# Supplementary material for: I2-catalyzed synthesis of 3-aminopyrrole with homopropargylic amines and nitrosoarenes
Source: Royal Society of Chemistry journal article supplement (doi:10.1039/d4cc00482e), 2024-01-01
Supplement: d4cc00482e1.pdf [file d4cc00482e1.pdf]

## Supporting Information

### **I<sub>2</sub>-Catalyzed Synthesis of 3-Aminopyrrole with Homopropargylic Amines and Nitrosoarenes**

Jiaze Qin,<sup>†a</sup> Shixuan Jiang,<sup>†a</sup> Xiaofeng Luo,<sup>b</sup> Tianqiang Wang,<sup>b</sup> Peihua Liu,<sup>c</sup>  
Bingxiang Yuan<sup>a</sup> and Rulong Yan<sup>\*a</sup>

<sup>a</sup> *State Key Laboratory of Applied Organic Chemistry, College of Chemistry and Chemical Engineering, Lanzhou University, Lanzhou 73000, Gansu, China.*

*Fax: 0931-8912596 E-mail: [yanrl@lzu.edu.cn](mailto:yanrl@lzu.edu.cn)*

<sup>b</sup> *Chengdu Guibao Science and Technology Co., Ltd, Chengdu 610041 Sichuan, China.*

<sup>c</sup> *Research Institute of Oil and Gas Technology of Changqing Oilfield Company, Xian 710018, Shaanxi, China.*

<sup>†</sup> These authors contributed equally.

### Table of Contents

|                                |         |
|--------------------------------|---------|
| General Remark                 | S2      |
| Experimental Section           | S2-S4   |
| X-Ray Crystal Data of Compound | S5-S6   |
| The Data of Products           | S7-S25  |
| Reference                      | S25-S26 |
| NMR spectra                    | S27-S86 |

## General remark

$^1\text{H}$  NMR and  $^{13}\text{C}$  NMR spectra were recorded on Bruker 400M and Mercury 300M in  $\text{CDCl}_3$ . All chemical shifts are given as  $\delta$  value (ppm) with reference to tetramethylsilane (TMS) as an internal standard. All compounds were further characterized by HRMS; copies of  $^1\text{H}$  NMR and  $^{13}\text{C}$  NMR spectra were provided. Products were purified by flash chromatography on 200-300 mesh silica gels. All melting points were determined without correction. All reactions were carried out under air in oven-dried glassware, unless otherwise noted. All reagents were purchased commercially and used as received, unless otherwise noted.

## General procedure for the synthesis of aminoalkynes **1a-1ac**<sup>[1-3]</sup>:

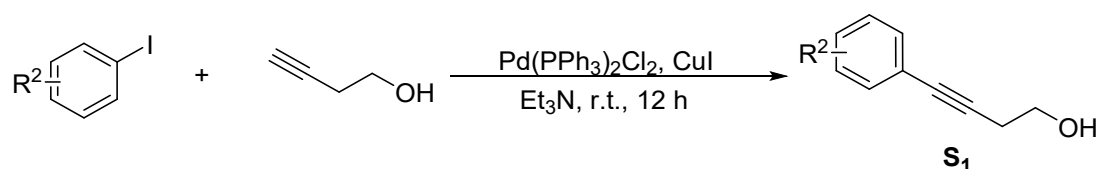

To a suspension of  $\text{Pd(PPh}_3)_2\text{Cl}_2$  (21 mg, 0.03 mmol),  $\text{CuI}$  (5.7 mg, 0.03 mmol) in  $\text{Et}_3\text{N}$  (1.5 mL) was added a solution of iodobenzene (1.2 eq) and but-3-yn-1-ol (210 mg, 3.0 mmol, 1.0 eq) in  $\text{Et}_3\text{N}$  (15 mL). The mixture was stirred at room temperature for 12 h and then was diluted with  $\text{EtOAc}$  (20 mL), filtered off and evaporated under reduced pressure. The residue was purified through column chromatography on silica gel (petroleum ether/ $\text{EtOAc}$  = 15/1 to 5/1) to afford substituted **S**<sub>1</sub> as yellow oil.

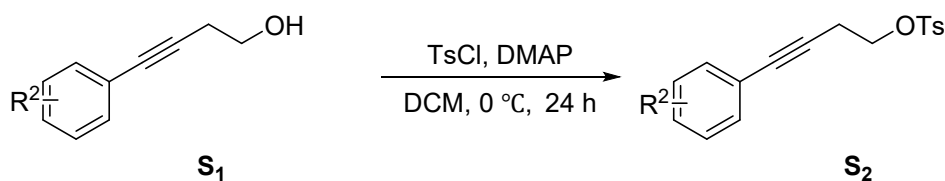

To a solution of **S**<sub>1</sub> (1 equiv.), triethylamine (1.2 eq), and 4-(dimethylamino)pyridine (0.2 eq) in  $\text{DCM}$  (6 mL/mmol) at 0 °C was added *p*-toluenesulfonyl chloride (1.05 eq) in three portions. The reaction mixture was brought to room temperature and stirred for 15 h. Aq.  $\text{NaOH}$  (1 N) was added, and the mixture was vigorously stirred for 15 min at rt. The usual workup ( $\text{DCM}$ , brine) gave *p*-toluenesulfonate derivatives **S**<sub>2</sub> in excellent yields as yellowish oil.

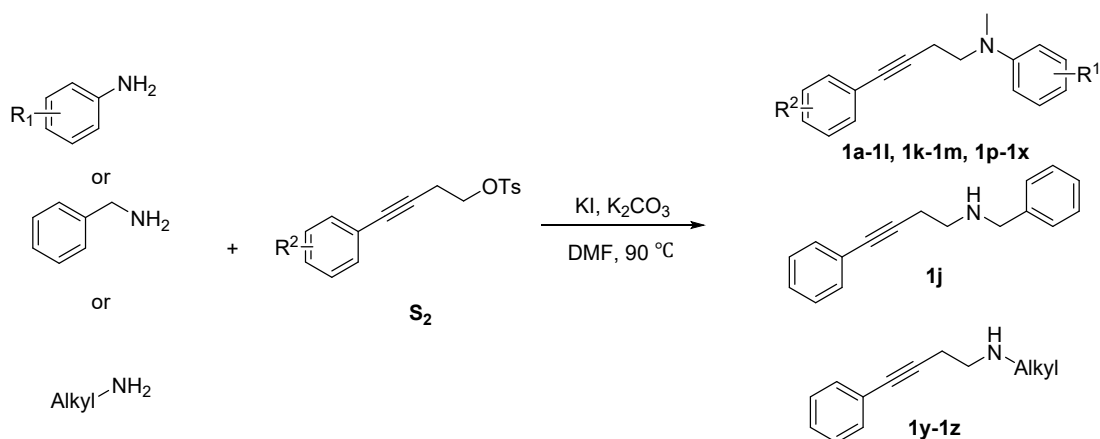

To a solution of aniline (1.5 eq), the above obtained **S<sub>2</sub>** (1 eq) and KI (0.1 eq) in DMF (2 mL/mmol) was added K<sub>2</sub>CO<sub>3</sub> (3 eq). The mixture was heated to 90 °C. After the complete consumption of **S<sub>2</sub>** (TLC), the reaction mixture was cooled to room temperature, quenched with a saturated solution of NH<sub>4</sub>Cl, extracted with AcOEt three times (3×20 mL), washed with small amounts of water (100 mL). The combined organic layers were dried with anhydrous Na<sub>2</sub>SO<sub>4</sub> and the solvent was removed in vacuo to afford a residue. The residue was purified by column chromatography on silica gel using petroleum ether/EtOAc (40:1) as eluent to provide the desired compounds **1a-1m, 1p-1x** in moderate yields as a yellow oil.

**General procedure for the synthesis of *N*-(1-(4-chlorophenyl)-4-phenylbut-3-yn-1-yl)aniline **1u**<sup>[3-4]</sup>:**

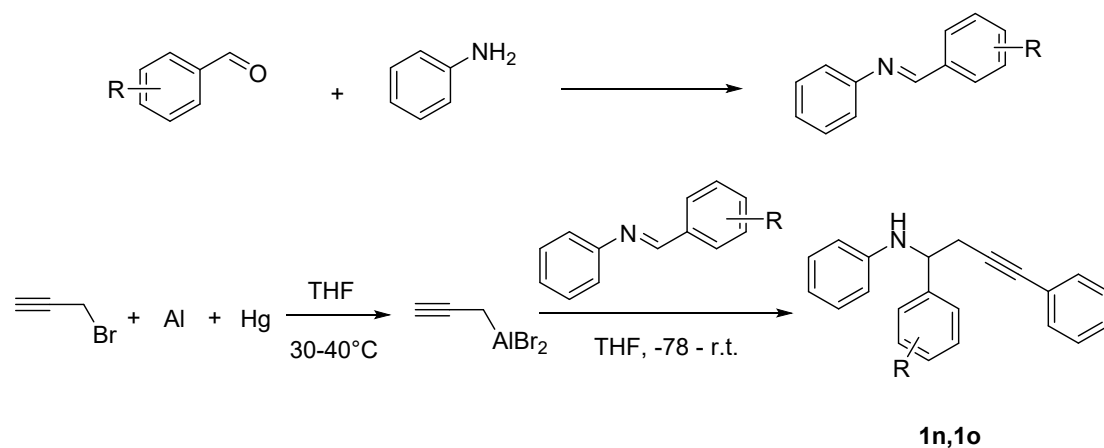

A dried round-bottom flask was charged with benzaldehyde (8.0 mmol), the aniline (8.0 mmol), molecular sieves 4Å (1mg /1.0 mmol aldehyde) and dichloromethane. The reaction mixture was stirred at room temperature and traced by TLC until the reaction finished. Then the mixture was filtered and the filtrate was concentrated

under reduced pressure, gave the pure imines without additional purification.

An aluminum amalgam was prepared from aluminum powder (0.5 g, 18.0 mmol) and a catalytic amount of mercuric chloride (10 mg) in 7.5 mL anhydrous THF by vigorously stirring at room temperature for 1 h under a N<sub>2</sub> atmosphere. A solution of propargyl bromide (18.0 mmol) in 12.5 mL of anhydrous THF was then slowly added to the suspension at such a rate as to maintain the temperature between 30-40°C. After the addition, the reaction mixture was continued to stir until a dark grey solution was obtained. The generated propargyl aluminum sesquibromide solution was added to a solution of imine (6.0 mmol) in 20.0 mL of anhydrous THF at -78°C under N<sub>2</sub> atmosphere. The reaction mixture was stirred at -78°C for about 1 h, then warmed to room temperature and continue to stir for additional 3-4 h (monitored by TLC). The mixture was quenched by adding saturated NH<sub>4</sub>Cl (aq), and extracted with EtOAc (3 × 20 mL), and washed with brine, combined organic extracts, dried over MgSO<sub>4</sub>, and concentrated in vacuo to give the residue. The residue was purified by flash chromatography over silica gel (gradient elution of EtOAc /petroleum ether, PE : EA = 50 : 1).

**General procedure for synthesis of 3-animopyrroles from *N*-(3-butynyl)anilines and nitrosoarenes:**

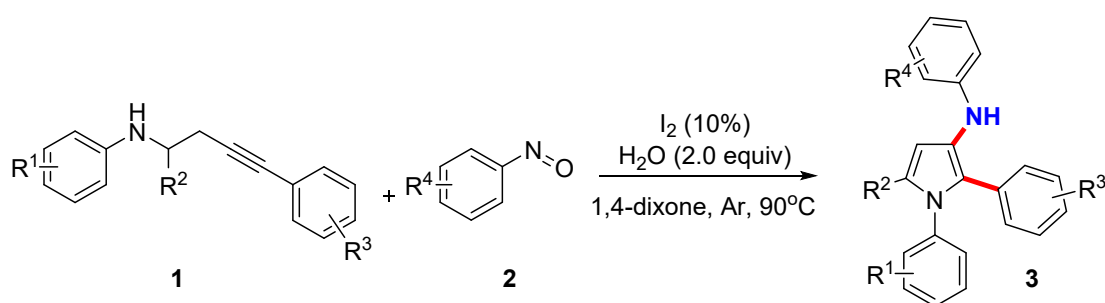

The *N*-(3-butynyl)anilines (**1**, 0.5 mmol), nitrosoarenes (**2**, 1.0 mmol), I<sub>2</sub> (0.05mmol), H<sub>2</sub>O (1.0 mmol) were mixed in 1,4-dioxane (2 mL) and this mixture was carried out under argon at 90 °C in sealed tube and the reaction time was monitored by TLC. Then the reaction mixture was cooled to room temperature and the solvent was evaporated in vacuo and the crude product was purified by column chromatography,



eluting with petroleum ether/EtOAc (100:1) to afford the desired 3-animopyrroles (**3**).

### X-Ray Crystal Data of Compound **3ta**:

Crystal **3ta** Growth with the Volatilization Method: An amount of 20 mg **3ta** was dissolved in DCE/PE (1:1) on the brown small reagent bottle (5 mL), which acted as good solvent, and a layer of ether was injected on the surface of tetrahydrofuran, and the cap is covered with a thin film, yellow crystals will be presented after seven days. Single crystals of  $C_{22}H_{17}FN_2$  (**3ta**) was determinate. A suitable crystal was selected and determinate on a Super Nova, Dual, Cu at zero, Eos diffractometer. The crystal was kept at 290.9(4) K during data collection. Using Olex2<sup>[5]</sup>, the structure was solved with the ShelXS<sup>[6]</sup> structure solution program using Direct Methods and refined with the ShelXL<sup>[7]</sup> refinement package using Least Squares minimisation.

All hydrogen atoms were placed by geometrical considerations and were added to the structure factor calculations. The crystal structure (excluding structure factor) has been deposited to Cambridge Crystallographic Data Centre and allocated deposition number: **3ta**: CCDC 2290112.

**X-Ray Data of Compound 3ta.** The ellipsoids are shown at 30% probability.

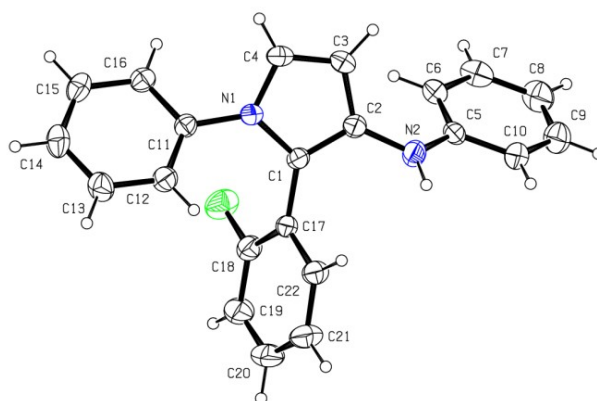

**Figure S1** X-Ray Crystal structure of **3ta**

**Table S2.** Crystal data and structure refinement for **3ta**.

|                     |                    |
|---------------------|--------------------|
| Identification code | <b>3ta</b>         |
| Empirical formula   | $C_{22}H_{17}FN_2$ |
| Formula weight      | 328.38             |
| Temperature/K       | 290.9(4)           |
| Crystal system      | monoclinic         |
| Space group         | $P2_1/c$           |

|                                             |                                                                |
|---------------------------------------------|----------------------------------------------------------------|
| a/Å                                         | 6.2418(3)                                                      |
| b/Å                                         | 18.1094(7)                                                     |
| c/Å                                         | 15.2988(6)                                                     |
| $\alpha$ /°                                 | 90.00                                                          |
| $\beta$ /°                                  | 96.701(4)                                                      |
| $\gamma$ /°                                 | 90.00                                                          |
| Volume/Å <sup>3</sup>                       | 1717.49(12)                                                    |
| Z                                           | 4                                                              |
| $\rho_{\text{calc}}$ /cm <sup>3</sup>       | 1.270                                                          |
| $\mu$ /mm <sup>-1</sup>                     | 0.083                                                          |
| F(000)                                      | 688.0                                                          |
| Crystal size/mm <sup>3</sup>                | 0.22 × 0.17 × 0.15                                             |
| Radiation                                   | MoK $\alpha$ ( $\lambda$ = 0.71073)                            |
| 2 $\Theta$ range for data collection/°      | 6.94 to 52.04                                                  |
| Index ranges                                | -7 ≤ h ≤ 4, -22 ≤ k ≤ 11, -18 ≤ l ≤ 17                         |
| Reflections collected                       | 6256                                                           |
| Independent reflections                     | 3383 [ $R_{\text{int}}$ = 0.0260, $R_{\text{sigma}}$ = 0.0540] |
| Data/restraints/parameters                  | 3383/0/226                                                     |
| Goodness-of-fit on F <sup>2</sup>           | 1.019                                                          |
| Final R indexes [ $I \geq 2\sigma(I)$ ]     | $R_1$ = 0.0524, $wR_2$ = 0.1131                                |
| Final R indexes [all data]                  | $R_1$ = 0.0901, $wR_2$ = 0.1337                                |
| Largest diff. peak/hole / e Å <sup>-3</sup> | 0.13/-0.23                                                     |

### The Data of Products:

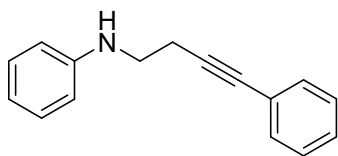

#### ***N*-(3-phenylprop-2-yn-1-yl)aniline (1a)**

Yellow oil (484.0 mg, 73% yield).  $^1\text{H}$  NMR (300 MHz,  $\text{CDCl}_3$ , ppm):  $\delta$  7.41-7.39 (m, 2 H), 7.30-7.25 (m, 3 H), 7.22-7.18 (m, 2 H), 6.77-6.71 (m, 1 H), 6.70-6.63 (m, 2 H), 3.99 (s, 1 H), 3.40 (t,  $J = 6.7$  Hz, 2 H), 2.73 (t,  $J = 6.7$  Hz, 2 H).  $^{13}\text{C}$  NMR (75 MHz,  $\text{CDCl}_3$ , ppm):  $\delta = 147.9, 131.8, 129.5, 128.4, 128.1, 123.6, 118.0, 113.3, 87.3, 82.4, 42.9, 20.4$ .

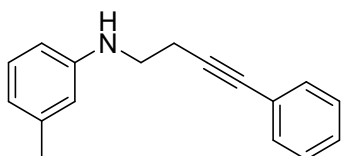

#### **3-methyl-*N*-(4-phenylbut-3-yn-1-yl)aniline (1b)**

Yellow oil (486.5mg, 69% yield).  $^1\text{H}$  NMR (300 MHz,  $\text{CDCl}_3$ , ppm):  $\delta = 7.42$ -7.39 (m, 2 H), 7.32-7.28 (m, 3 H), 7.11-7.06 (m, 1 H), 6.58-6.54 (m, 1 H), 6.50-6.47 (m, 2 H), 3.93 (s, 1 H), 3.38 (t,  $J = 6.7$  Hz, 2 H), 2.72 (t,  $J = 6.7$  Hz, 2 H), 2.29 (d,  $J = 2.4$  Hz, 3 H);  $^{13}\text{C}$  NMR (75 MHz,  $\text{CDCl}_3$ , ppm):  $\delta = 147.8, 139.3, 131.8, 129.3, 128.4, 128.0, 123.5, 118.9, 114.1, 110.4, 87.4, 82.3, 42.9, 21.8, 20.3$ .

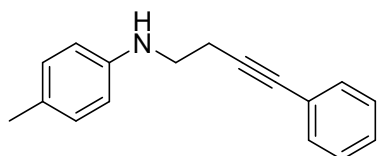

#### **4-methyl-*N*-(4-phenylbut-3-yn-1-yl)aniline (1c)**

Yellow oil (465.3mg, 66% yield).  $^1\text{H}$  NMR (300 MHz,  $\text{CDCl}_3$ , ppm):  $\delta = 7.42$ -7.39 (m, 2 H), 7.330-7.26 (m, 3 H), 7.02-6.99 (m, 2 H), 6.60-6.57 (m, 2 H), 3.84 (s, 1H), 3.35 (t,  $J = 6.7$  Hz, 2 H), 2.69 (t,  $J = 6.7$  Hz, 2H), 2.24 (s, 3 H);  $^{13}\text{C}$  NMR (75 MHz,  $\text{CDCl}_3$ , ppm):  $\delta = 145.5, 131.7, 129.9, 128.4, 128.0, 127.1, 123.5, 113.5, 87.4, 82.3, 43.2, 20.5, 20.2$ .

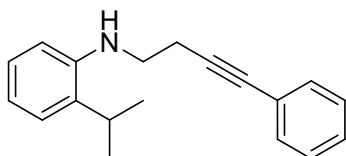

### 2-isopropyl-*N*-(4-phenylbut-3-yn-1-yl)aniline (1d)

Yellow oil (339.3 mg, 43% yield). <sup>1</sup>H NMR (300 MHz, CDCl<sub>3</sub>, ppm): δ = 7.40-7.37 (m, 2 H), 7.27-7.25 (m, 3 H), 7.16-7.10 (m, 2 H), 6.78-6.73 (m, 1 H), 6.68-6.65 (m, 1 H), 4.11 (s, 1 H), 3.39 (t, *J* = 6.5 Hz, 2 H), 2.92 (p, *J* = 6.7 Hz, 1 H), 2.75 (m, 2 H), 1.25 (d, *J* = 6.8 Hz, 6 H); <sup>13</sup>C NMR (75 MHz, CDCl<sub>3</sub>, ppm): δ = 144.5, 132.7, 131.7, 128.4, 128.0, 126.9, 125.2, 123.5, 117.8, 110.8, 87.4, 82.6, 42.8, 27.3, 22.4, 20.1.

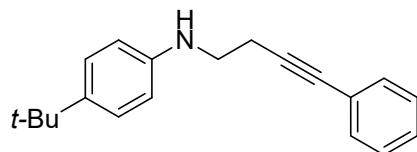

### 4-(*tert*-butyl)-*N*-(4-phenylbut-3-yn-1-yl)aniline (1e)

Yellow oil (473.7 mg, 57% yield). <sup>1</sup>H NMR (400 MHz, CDCl<sub>3</sub>, ppm): δ = 7.40-7.38 (m, 2 H), 7.28-7.23 (m, 3 H), 7.21-7.20 (m, 2 H), 6.63-6.61 (m, 2 H), 3.85 (s, 1 H), 3.37 (t, *J* = 6.6 Hz, 2 H), 2.70 (t, *J* = 6.6 Hz, 2 H), 1.28 (s, 9 H); <sup>13</sup>C NMR (100 MHz, CDCl<sub>3</sub>, ppm): δ = 145.5, 140.7, 131.7, 128.4, 128.0, 126.2, 123.6, 113.1, 87.5, 82.3, 43.1, 34.0, 31.7, 20.4.

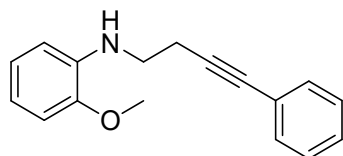

### 2-methoxy-*N*-(4-phenylbut-3-yn-1-yl)aniline (1f)

Yellow oil (286.1 mg, 38% yield). <sup>1</sup>H NMR (400 MHz, CDCl<sub>3</sub>, ppm): δ = 7.42-7.39 (m, 2 H), 7.28-7.25 (m, 3 H), 6.90-6.85 (m, 1 H), 6.77-6.75 (m, 1 H), 6.70-6.32 (m, 2 H), 4.57 (s, 1 H), 3.80 (s, 3 H), 3.39 (t, *J* = 6.9 Hz, 2 H), 2.71 (t, *J* = 6.9 Hz, 2 H); <sup>13</sup>C NMR (100 MHz, CDCl<sub>3</sub>, ppm): δ = 147.1, 137.7, 131.7, 128.3, 127.9, 123.6, 121.4, 116.9, 110.1, 109.7, 87.5, 82.2, 55.5, 42.6, 20.2.

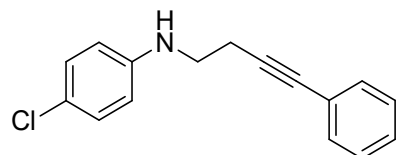

### 4-chloro-*N*-(4-phenylbut-3-yn-1-yl)aniline (1g)

Yellow oil (527.9 mg, 69% yield). <sup>1</sup>H NMR (300 MHz, CDCl<sub>3</sub>, ppm): δ = 7.42-7.38 (m, 2 H), 7.31-7.28 (m, 3 H), 7.15-7.12 (m, 2 H), 6.60-6.56 (m, 2 H), 4.00 (s, 1 H), 3.35 (t, *J* = 6.6 Hz, 2 H), 2.71 (t, *J* = 6.6 Hz, 2 H); <sup>13</sup>C NMR (75 MHz, CDCl<sub>3</sub>, ppm):

$\delta = 146.4, 131.8, 129.3, 128.4, 128.2, 128.1, 123.4, 122.5, 114.3, 87.0, 82.5, 42.9, 20.2.$

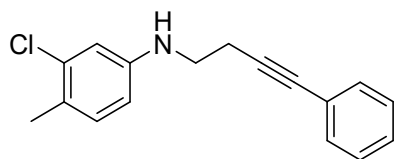

**3-chloro-4-methyl-N-(4-phenylbut-3-yn-1-yl)aniline (1h)**

Yellow oil (338.9 mg, 42% yield).  $^1\text{H}$  NMR (400 MHz,  $\text{CDCl}_3$ , ppm):  $\delta = 7.42\text{-}7.39$  (m, 2 H), 7.30-7.28 (m, 3 H), 7.02-7.00 (m, 1 H), 6.68-6.67 (m, 1 H), 6.49-6.46 (m, 1 H), 3.92 (s, 1 H), 3.34 (t,  $J = 6.6$  Hz, 2 H), 2.70 (t,  $J = 6.6$  Hz, 2 H), 2.25 (s, 3 H);  $^{13}\text{C}$  NMR (100 MHz,  $\text{CDCl}_3$ , ppm):  $\delta = 147.0, 135.0, 131.8, 131.5, 128.4, 128.1, 124.8, 123.5, 113.5, 112.1, 87.1, 82.5, 43.0, 20.2, 19.0.$

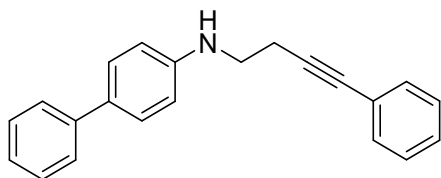

**N-(4-phenylbut-3-yn-1-yl)-[1,1'-biphenyl]-4-amine (1i)**

Yellow oil (597.0 mg, 67% yield).  $^1\text{H}$  NMR (400 MHz,  $\text{CDCl}_3$ , ppm):  $\delta = 7.63\text{-}7.61$  (m, 2 H), 7.54-7.46 (m, 6 H), 7.37-7.35 (m, 4 H), 6.79-6.77 (m, 2 H), 4.11 (s, 1 H), 3.47 (t,  $J = 6.9$  Hz, 2 H), 2.79 (t,  $J = 6.9$  Hz, 2 H);  $^{13}\text{C}$  NMR (100 MHz,  $\text{CDCl}_3$ , ppm):  $\delta = 147.2, 141.3, 131.8, 130.7, 128.8, 128.4, 128.1, 128.0, 126.4, 126.2, 123.5, 113.5, 87.3, 82.4, 42.8, 20.3.$

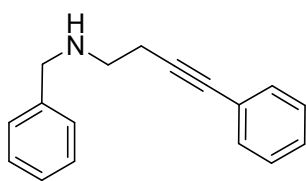

**N-benzyl-4-phenylbut-3-yn-1-amine (1j)<sup>[8]</sup>**

Yellow oil (183.3 mg, 26% yield).  $^1\text{H}$  NMR (300 MHz,  $\text{CDCl}_3$ , ppm):  $\delta = 7.40\text{-}7.38$  (m, 2 H), 7.36-7.31 (m, 4 H), 7.29-7.25 (m, 4 H), 3.86 (s, 2 H), 2.89-2.86 (m, 2 H), 2.66-2.62 (m, 2 H), 2.09 (s, 1 H);  $^{13}\text{C}$  NMR (75 MHz,  $\text{CDCl}_3$ , ppm):  $\delta = 140.0, 131.7, 131.4, 128.6, 128.3, 127.9, 127.5, 123.6, 87.8, 81.8, 53.3, 47.5, 20.5.$

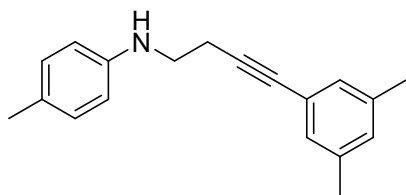

***N*-(4-(3,5-dimethylphenyl)but-3-yn-1-yl)-4-methylaniline (1k)**

Yellow oil (355.1mg, 45% yield). <sup>1</sup>H NMR (400 MHz, CDCl<sub>3</sub>, ppm): δ = 7.03-6.99 (m, 4 H), 6.92 (s, 1 H), 6.60-6.58 (m, 2 H), 3.85 (s, 1 H), 3.35 (t, *J* = 6.6 Hz, 2 H), 2.69 (t, *J* = 6.6 Hz, 2 H), 2.27 (s, 6H), 2.24 (s, 3 H) ; <sup>13</sup>C NMR (100 MHz, CDCl<sub>3</sub>, ppm): δ = 145.6, 138.0, 130.0, 129.9, 129.5, 127.2, 123.2, 113.6, 86.6, 82.6, 43.4, 21.2, 20.5, 20.3.

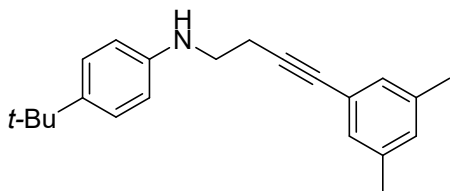

**4-(*tert*-butyl)-*N*-(4-(3,5-dimethylphenyl)but-3-yn-1-yl)aniline (1l)**

Yellow oil (420.9 mg, 46% yield). <sup>1</sup>H NMR (400 MHz, CDCl<sub>3</sub>, ppm): δ = 7.25-7.23 (m, 2 H), 7.06 (s, 2 H), 6.94 (s, 1 H), 6.65-6.63 (m, 2 H), 3.90 (s, 1 H), 3.38 (t, *J* = 6.6 Hz, 2 H), 2.71 (t, *J* = 6.6 Hz, 2 H), 2.29 (s, 6 H), 1.30 (s, 9 H); <sup>13</sup>C NMR (100 MHz, CDCl<sub>3</sub>, ppm): δ = 145.5, 140.7, 137.9, 129.9, 129.5, 126.2, 123.2, 113.1, 86.7, 82.6, 43.2, 34.0, 31.7, 21.2, 20.4.

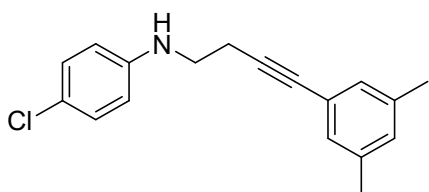

**4-Chloro-*N*-(4-(3,5-dimethylphenyl)but-3-yn-1-yl)aniline (1m)<sup>[8]</sup>**

Yellow oil (297.2 mg, 35% yield). <sup>1</sup>H NMR (300 MHz, CDCl<sub>3</sub>, ppm): δ 7.13-7.11 (m, 2 H), 7.03 (s, 2 H), 6.92 (s, 1 H), 6.56-6.54 (m, 2 H), 4.52 (s, 1 H), 3.33-3.29 (m, 2 H), 2.69-2.65 (m, 2 H), 2.27 (s, 6 H); <sup>13</sup>C NMR (75 MHz, CDCl<sub>3</sub>, ppm): δ 146.3, 137.8, 129.8, 129.3, 129.0, 122.8, 122.1, 114.1, 86.1, 52.6, 42.7, 21.0, 20.0.

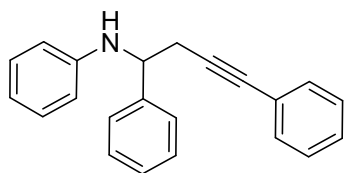

***N*-(1,4-diphenylbut-3-yn-1-yl)aniline (1n)<sup>[8]</sup>**

Yellow solid (650.4 mg, 73% yield). <sup>1</sup>H NMR (400 MHz, CDCl<sub>3</sub>, ppm): δ = 7.46-7.44 (m, 2 H), 7.37-7.32 (m, 3 H), 7.29-7.23 (m, 3 H), 7.12-7.07 (m, 2 H), 7.12-7.08 (m, 2 H), 6.69-6.65 (m, 1 H), 6.58-6.55 (m, 2 H), 4.62-4.59 (m, 1 H), 4.48 (s, 1 H), 3.00-2.84 (m, 2 H); <sup>13</sup>C NMR (100 MHz, CDCl<sub>3</sub>, ppm): δ = 147.2, 142.4, 131.6, 129.1, 128.6, 128.2, 128.0, 127.4, 126.4, 123.2, 117.7, 113.7, 85.8, 83.5, 56.9, 29.2.

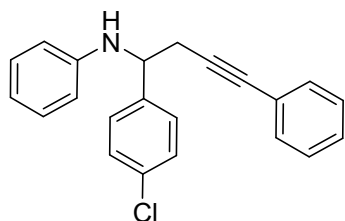

***N*-(1-(4-chlorophenyl)-4-phenylbut-3-yn-1-yl)aniline (1o)<sup>[8]</sup>**

Yellow solid (715.0 mg, 72% yield). <sup>1</sup>H NMR (400 MHz, CDCl<sub>3</sub>, ppm): δ = 7.41-7.25 (m, 8 H), 7.14-7.08 (m, 2 H), 6.72-6.67 (m, 2 H), 6.55-6.52 (d, *J* = 12.0 Hz, 2 H), 4.61-4.55 (m, 1 H), 4.48 (s, 1 H), 3.00-2.81 (m, 2 H); <sup>13</sup>C NMR (100 MHz, CDCl<sub>3</sub>, ppm): δ = 146.8, 140.9, 133.1, 131.6, 129.2, 128.8, 128.3, 128.1, 127.8, 123.0, 118.0, 113.7, 85.1, 56.2, 29.2.

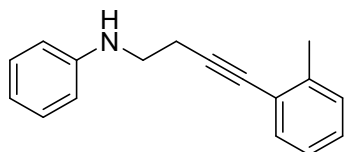

***N*-(4-(*o*-tolyl)but-3-yn-1-yl)aniline (1p)**

Yellow oil (373.7 mg, 53% yield). <sup>1</sup>H NMR (400 MHz, CDCl<sub>3</sub>, ppm): δ = 7.38-7.36 (m, 1 H), 7.20-7.12 (m, 4 H), 7.11-7.08 (m, 1 H), 6.74-6.70 (m, 1 H), 6.65-6.63 (m, 2 H), 3.97 (s, 1 H), 3.37 (t, *J* = 6.6 Hz, 2 H), 2.74 (t, *J* = 6.6 Hz, 2 H), 2.41 (s, 3 H); <sup>13</sup>C NMR (100 MHz, CDCl<sub>3</sub>, ppm): δ = 147.8, 140.1, 132.0, 129.5, 129.4, 128.0, 125.6, 123.3, 117.9, 113.3, 91.2, 81.3, 43.0, 20.9, 20.4.



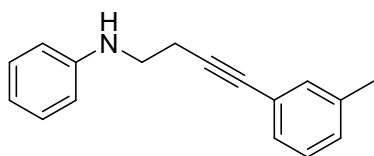

***N*-(4-(*m*-tolyl)but-3-yn-1-yl)aniline (1q)**

Yellow oil (345.5 mg, 49% yield). <sup>1</sup>H NMR (400 MHz, CDCl<sub>3</sub>, ppm): δ = 7.24-7.17 (m, 5 H), 7.11 (s, 1 H), 6.73 (s, 1 H), 6.68-6.66 (m, 2 H), 3.98 (s, 1H), 3.38 (t, *J* = 6.6 Hz, 2 H), 2.71 (t, *J* = 6.6 Hz, 2 H), 2.31 (s, 3 H); <sup>13</sup>C NMR (100 MHz, CDCl<sub>3</sub>, ppm): δ = 147.9, 138.1, 132.5, 132.3, 129.5, 129.4, 128.9, 123.4, 117.9, 113.3, 86.9, 82.5, 42.9, 21.4, 21.3, 20.3.

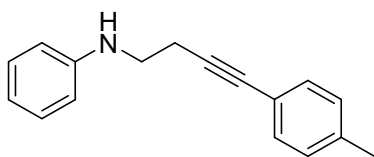

***N*-(4-(*p*-tolyl)but-3-yn-1-yl)aniline (1r)**

Yellow oil (444.2 mg, 63% yield). <sup>1</sup>H NMR (300 MHz, CDCl<sub>3</sub>, ppm): δ = 7.30-7.28 (m, 2 H), 7.18-7.14 (m, 2H), 7.07-7.04 (m, 2 H), 6.73-6.69 (m, 1 H), 6.62-6.60 (m, 2 H), 3.91 (s, 1 H), 3.31 (t, *J* = 6.6 Hz, 2 H), 2.64 (t, *J* = 6.6 Hz, 2 H), 2.29 (s, 3 H); <sup>13</sup>C NMR (75 MHz, CDCl<sub>3</sub>, ppm): δ = 147.8, 138.0, 131.6, 129.4, 129.1, 120.4, 117.7, 113.1, 86.5, 82.3, 42.8, 21.5, 20.2.

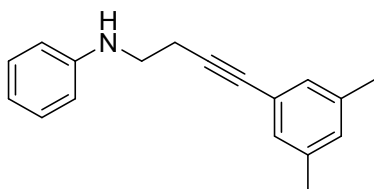

***N*-(4-(3,5-dimethylphenyl)but-3-yn-1-yl)aniline (1s)**

Yellow oil (343.6 mg, 46% yield). <sup>1</sup>H NMR (400 MHz, CDCl<sub>3</sub>, ppm): δ = 7.27-7.23 (m, 2 H), 7.10 (s, 2 H), 6.98 (s, 1 H), 6.81-6.77 (m, 1 H), 6.72-6.70 (m, 2 H), 4.02 (s, 1 H), 3.42 (t, *J* = 6.6 Hz, 2 H), 2.75 (t, *J* = 6.6 Hz, 2 H), 2.33 (s, 6 H); <sup>13</sup>C NMR (100 MHz, CDCl<sub>3</sub>, ppm): δ = 147.9, 137.9, 129.9, 129.5, 123.1, 117.9, 113.3, 86.5, 82.6, 42.9, 21.2, 20.3.

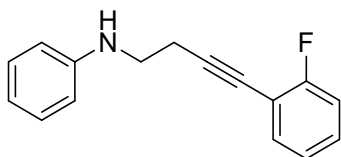

***N*-(4-(2-fluorophenyl)but-3-yn-1-yl)aniline (1t)**

Yellow oil (329.8 mg, 46% yield). <sup>1</sup>H NMR (400 MHz, CDCl<sub>3</sub>, ppm): δ = 7.40-7.36 (m, 1 H), 7.31-7.13 (m, 3 H), 7.10-6.98 (m, 2 H), 6.75-6.71 (m, 1 H), 6.67-6.65 (m, 2 H), 4.01 (s, 1 H), 3.39 (t, *J* = 6.6 Hz, 2 H), 2.74 (t, *J* = 6.6 Hz, 2 H); <sup>13</sup>C NMR (100 MHz, CDCl<sub>3</sub>, ppm): δ = 164.1-161.6 (d, *J* = 249.0 Hz, 1 C), 147.6, 133.4, 129.5 (d, *J* = 8.0 Hz, 1 C), 129.3, 123.8 (d, *J* = 4.0 Hz, 1 C), 117.7, 115.4-115.2 (d, *J* = 21.0 Hz, 1 C), 113.1, 111.9-111.8 (d, *J* = 16.0 Hz, 1 C), 92.7, 75.6, 42.5, 20.2.

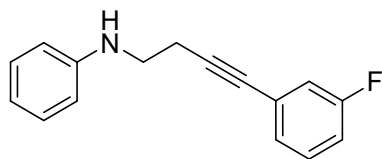

***N*-(4-(3-fluorophenyl)but-3-yn-1-yl)aniline (1u)**

Yellow oil (337.0 mg, 47% yield). <sup>1</sup>H NMR (400 MHz, CDCl<sub>3</sub>, ppm): δ = 7.28-7.14 (m, 4 H), 7.10-7.07 (m, 1 H), 6.99-6.94 (m, 1 H), 6.75-6.72 (m, 1 H), 6.68-6.60 (m, 2 H), 3.94 (s, 1 H), 3.38 (t, *J* = 6.6 Hz, 2 H), 2.69 (t, *J* = 6.6 Hz, 2 H); <sup>13</sup>C NMR (100 MHz, CDCl<sub>3</sub>, ppm): δ = 163.5-161.1 (d, *J* = 245.0 Hz, 1 C), 147.5, 129.8, 129.3, 127.5, 125.3-125.2 (d, *J* = 10.0 Hz, 1 C), 118.6-118.3 (d, *J* = 30.0 Hz, 1 C), 117.8, 115.3-115.1 (d, *J* = 22.0 Hz, 1 C), 113.1, 88.4, 81.1, 42.5, 20.1.

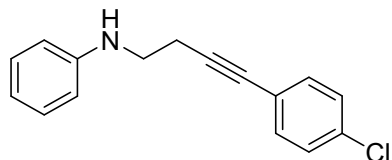

***N*-(4-(4-chlorophenyl)but-3-yn-1-yl)aniline (1v)**

Yellow oil (503.9 mg, 76% yield). <sup>1</sup>H NMR (400 MHz, CDCl<sub>3</sub>, ppm): δ = 7.31-7.29 (m, 2 H), 7.25-7.22 (m, 2 H), 7.20-7.16 (m, 2 H), 6.74-6.70 (m, 1 H), 6.64-6.62 (m, 2 H), 3.91 (s, 1 H), 3.35 (t, *J* = 6.7 Hz, 2 H), 2.67 (t, *J* = 6.7 Hz, 2 H); <sup>13</sup>C NMR (100 MHz, CDCl<sub>3</sub>, ppm): δ = 147.7, 133.9, 133.0, 129.4, 128.7, 122.0, 117.9, 113.2, 88.5, 81.3, 42.7, 20.3.

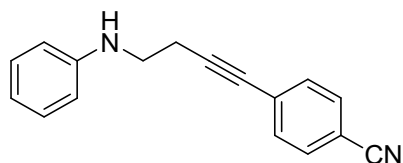

**4-(4-(phenylamino)but-1-yn-1-yl)benzotrile (1w)**

Yellow oil (612.5 mg, 83% yield). <sup>1</sup>H NMR (400 MHz, CDCl<sub>3</sub>, ppm): δ = 7.54-7.52

(m, 2 H), 7.43-7.41 (m, 2 H), 7.21-7.17 (m, 2 H), 6.75-6.73 (m, 1 H), 6.66-6.64 (m, 2 H), 3.96 (s, 1 H), 3.40 (t,  $J = 6.6$  Hz, 2 H), 2.72 (t,  $J = 6.6$  Hz, 2 H);  $^{13}\text{C}$  NMR (100 MHz,  $\text{CDCl}_3$ , ppm):  $\delta = 147.5, 132.2, 132.0, 129.4, 128.5, 118.6, 117.9, 113.1, 111.2, 92.5, 80.9, 42.5, 20.3$ .

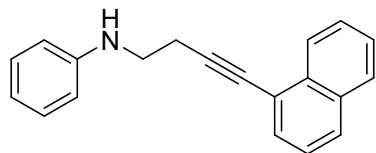

***N*-(4-(naphthalen-1-yl)but-3-yn-1-yl)aniline (1x)**

Yellow oil (430.9 mg, 53% yield).  $^1\text{H}$  NMR (400 MHz,  $\text{CDCl}_3$ , ppm):  $\delta = 8.32$ - $8.29$  (m, 1 H),  $7.78$ - $7.72$  (m, 2 H),  $7.62$ - $7.60$  (m, 1 H),  $7.53$ - $7.48$  (m, 2 H),  $7.47$ - $7.45$  (m, 1 H),  $7.37$ - $7.30$  (m, 3 H),  $7.19$ - $7.15$  (m, 2 H),  $6.74$ - $6.70$  (m, 1 H),  $6.64$ - $6.62$  (m, 2 H),  $3.97$  (s, 1 H),  $3.39$  (t,  $J = 6.7$  Hz, 2 H),  $2.78$  (t,  $J = 6.7$  Hz, 2 H);  $^{13}\text{C}$  NMR (100 MHz,  $\text{CDCl}_3$ , ppm):  $147.7, 133.5, 133.2, 131.6, 130.3, 129.4, 129.0, 128.9, 128.5, 128.4, 128.3, 128.2, 126.7, 126.4, 126.2, 125.3, 121.2, 117.8, 113.2, 92.4, 42.9, 22.7, 20.5$ .

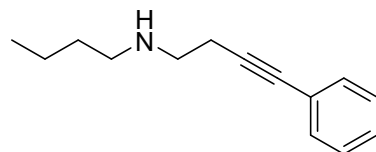

***N*-butyl-4-phenylbut-3-yn-1-amine (1y) <sup>[8]</sup>**

Yellow oil (416.7 mg, 69% yield).  $^1\text{H}$  NMR (400 MHz,  $\text{CDCl}_3$ , ppm):  $\delta = 7.41$ - $7.39$  (m, 2 H),  $7.28$ - $7.27$  (m, 3 H),  $2.87$ - $2.84$  (m, 2 H),  $2.66$ - $2.60$  (m, 4 H),  $1.71$  (s, 1 H),  $1.52$ - $1.48$  (m, 2 H),  $1.39$ - $1.35$  (m, 2 H),  $0.94$ - $0.91$  (m, 3 H);  $^{13}\text{C}$  NMR (100 MHz,  $\text{CDCl}_3$ , ppm):  $\delta = 131.8, 128.5, 127.6, 123.8, 88.1, 81.8, 49.2, 48.7, 47.9, 32.3, 20.6, 14.1$ .

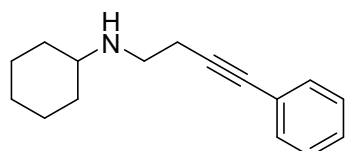

***N*-(4-phenylbut-3-yn-1-yl)cyclohexanamine (1z) <sup>[8]</sup>**

Yellow oil (422.2 mg, 62% yield).  $^1\text{H}$  NMR (400 MHz,  $\text{CDCl}_3$ , ppm):  $\delta = 7.40$ - $7.38$  (m, 2 H),  $7.30$ - $7.27$  (m, 3 H),  $2.90$ - $2.85$  (m, 2 H),  $2.62$ - $2.58$  (m, 2 H),  $2.53$ - $2.46$  (m, 1 H),  $1.92$ - $1.88$  (d,  $J = 16.0$  Hz, 2 H),  $1.76$ - $1.61$  (m, 4 H),  $1.33$ - $1.07$  (m, 5 H);  $^{13}\text{C}$  NMR (100 MHz,  $\text{CDCl}_3$ , ppm):  $\delta = 131.5, 128.2, 127.6, 123.6, 88.0, 81.7, 56.2, 45.2, 33.6$ ,

26.1, 25.0, 20.8.

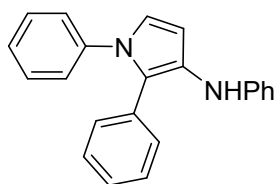

***N*,1,2-triphenyl-1*H*-pyrrol-3-amine (3aa)**

Yellow oil (113.2 mg, 74% yield). <sup>1</sup>H NMR (400 MHz, CDCl<sub>3</sub>, ppm): δ = 7.29-7.25 (m, 2 H), 7.23-7.15 (m, 6 H), 7.12-7.08 (m, 4 H), 6.90-6.89 (m, 3 H), 6.78-6.74 (m, 1 H), 6.42-6.41 (d, *J* = 4.0 Hz, 1 H), 5.23 (s, 1 H); <sup>13</sup>C NMR (100 MHz, CDCl<sub>3</sub>, ppm): δ = 147.3, 140.4, 131.1, 129.6, 129.2, 128.9, 128.2, 126.5, 126.2, 125.8, 125.3, 125.2, 121.7, 118.1, 114.0, 106.5. HRMS calcd for C<sub>22</sub>H<sub>19</sub>N<sub>2</sub> [M+H]<sup>+</sup> 311.1543; found: 311.1543.

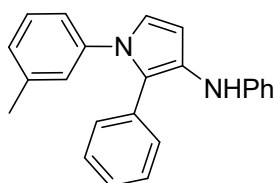

***N*,2-diphenyl-1-(*m*-tolyl)-1*H*-pyrrol-3-amine (3ba)**

Yellow oil (124.7 mg, 77% yield). <sup>1</sup>H NMR (400 MHz, CDCl<sub>3</sub>, ppm): δ = 7.24-7.15 (m, 6 H), 7.12-7.08 (m, 2 H), 7.05-6.99 (m, 2 H), 6.91-6.87 (m, 4 H), 6.80-6.75 (m, 1 H), 6.42-6.41 (d, *J* = 4.0 Hz, 1 H), 5.25 (s, 1 H), 2.30 (s, 3 H); <sup>13</sup>C NMR (100 MHz, CDCl<sub>3</sub>, ppm): δ = 147.3, 140.3, 138.9, 131.6, 131.2, 129.6, 129.2, 128.7, 128.2, 127.0, 126.4, 125.8, 125.5, 122.3, 121.7, 118.0, 114.0, 106.4, 21.3. HRMS calcd for C<sub>23</sub>H<sub>21</sub>N<sub>2</sub> [M+H]<sup>+</sup> 325.1699; found: 325.1700.

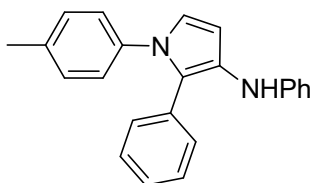

***N*,2-diphenyl-1-(*p*-tolyl)-1*H*-pyrrol-3-amine (3ca)**

Yellow oil (134.5 mg, 83% yield). <sup>1</sup>H NMR (400 MHz, CDCl<sub>3</sub>, ppm): δ = 7.24-7.17 (m, 5 H), 7.11-7.06 (m, 4 H), 7.01-6.98 (d, *J* = 4.0 Hz, 2 H), 6.89-6.86 (m, 3 H), 6.78-6.6.73 (m, 1 H), 6.40-6.39 (d, *J* = 4.0 Hz, 1 H), 5.23 (s, 1 H), 2.33 (s, 3 H); <sup>13</sup>C NMR

(100 MHz, CDCl<sub>3</sub>, ppm):  $\delta$  = 147.4, 138.0, 136.0, 131.2, 129.6, 129.5, 129.2, 128.2, 126.4, 125.5, 125.3, 125.1, 121.7, 118.0, 114.0, 106.3, 21.0. HRMS calcd for C<sub>23</sub>H<sub>21</sub>N<sub>2</sub> [M+H]<sup>+</sup> 325.1699; found: 325.1698.

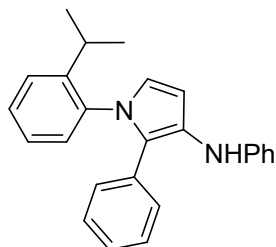

### 1-(2-isopropylphenyl)-*N*,2-diphenyl-1*H*-pyrrol-3-amine (3da)

Yellow oil (118.0 mg, 67% yield). <sup>1</sup>H NMR (400 MHz, CDCl<sub>3</sub>, ppm):  $\delta$  = 7.34-7.30 (m, 1 H), 7.27-7.23 (m, 5 H), 7.21-7.11 (m, 2 H), 7.08-7.05 (m, 3 H), 6.90-6.88 (d, *J* = 8.0 Hz, 2 H), 6.79-6.75 (m, 1 H), 6.72-6.71 (d, *J* = 4.0 Hz, 1 H), 6.40-6.39 (d, *J* = 4.0 Hz, 1 H), 5.25 (s, 1 H), 2.74-2.67 (m, 1 H), 1.09-1.08 (d, *J* = 4.0 Hz, 3 H), 0.74-0.72 (d, *J* = 4.0 Hz, 3 H); <sup>13</sup>C NMR (100 MHz, CDCl<sub>3</sub>, ppm):  $\delta$  = 147.7, 146.3, 138.4, 131.2, 129.3, 128.7, 128.6, 128.2, 127.3, 126.6, 126.5, 126.4, 126.1, 124.2, 122.6, 118.0, 114.0, 106.1, 27.6, 25.3, 22.4. HRMS calcd for C<sub>25</sub>H<sub>25</sub>N<sub>2</sub> [M+H]<sup>+</sup> 353.2012; found: 353.2010.

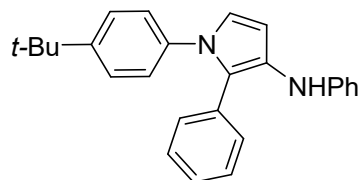

### 1-(4-(tert-butyl)phenyl)-*N*,2-diphenyl-1*H*-pyrrol-3-amine (3ea)

Yellow oil (155.5 mg, 85% yield). <sup>1</sup>H NMR (400 MHz, CDCl<sub>3</sub>, ppm):  $\delta$  = 7.30-7.25 (m, 2 H), 7.22-7.15 (m, 5 H), 7.11-7.09 (m, 2 H), 7.05-7.02 (d, *J* = 12.0 Hz, 2 H), 6.89-6.87 (m, 3 H), 6.78-6.74 (m, 1 H), 6.40 (d, *J* = 3.2 Hz, 1 H), 5.23 (s, 1 H), 1.30 (s, 9 H); <sup>13</sup>C NMR (100 MHz, CDCl<sub>3</sub>, ppm):  $\delta$  = 149.3, 147.5, 137.9, 131.4, 129.7, 129.3, 128.3, 126.5, 125.9, 125.6, 125.3, 124.8, 121.9, 118.1, 114.1, 106.4, 34.6, 31.4. HRMS calcd for C<sub>26</sub>H<sub>27</sub>N<sub>2</sub> [M+H]<sup>+</sup> 367.2169; found: 367.2171.

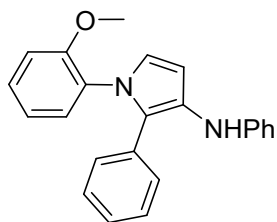

### 1-(2-methoxyphenyl)-N,2-diphenyl-1H-pyrrol-3-amine (3fa)

Yellow oil (115.9 mg, 68% yield).  $^1\text{H}$  NMR (400 MHz,  $\text{CDCl}_3$ , ppm):  $\delta$  = 7.24-7.13 (m, 6 H), 7.08-7.06 (m, 3 H), 6.92-6.85 (m, 4 H), 6.81-6.80 (d,  $J$  = 4.0 Hz, 1 H), 6.77-6.72 (m, 1 H), 6.41-6.40 (d,  $J$  = 4.0 Hz, 1 H), 5.24 (s, 1 H), 3.52 (s, 3 H);  $^{13}\text{C}$  NMR (100 MHz,  $\text{CDCl}_3$ , ppm):  $\delta$  = 154.3, 147.8, 131.8, 129.6, 129.3, 128.9, 128.7, 128.6, 128.0, 127.0, 126.3, 124.3, 122.2, 120.7, 117.9, 114.0, 112.2, 106.3, 55.5. HRMS calcd for  $\text{C}_{23}\text{H}_{21}\text{N}_2\text{O}$   $[\text{M}+\text{H}]^+$  341.1649; found: 341.1649.

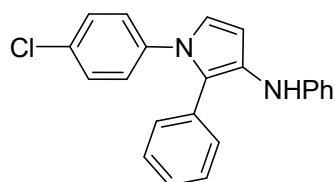

### 1-(4-chlorophenyl)-N,2-diphenyl-1H-pyrrol-3-amine (3ga)

Yellow oil (141.0 mg, 82% yield).  $^1\text{H}$  NMR (400 MHz,  $\text{CDCl}_3$ , ppm):  $\delta$  = 7.25-7.17 (m, 7 H), 7.09-7.02 (m, 4 H), 6.88-6.85 (m, 3 H), 6.78-6.75 (m, 1 H), 6.43-6.42 (d,  $J$  = 4.0 Hz, 1 H), 5.23 (s, 1 H);  $^{13}\text{C}$  NMR (100 MHz,  $\text{CDCl}_3$ , ppm):  $\delta$  = 147.1, 139.0, 131.9, 130.8, 129.7, 129.2, 129.1, 128.5, 126.8, 126.3, 126.2, 125.0, 121.6, 118.3, 114.1, 106.9. HRMS calcd for  $\text{C}_{22}\text{H}_{18}\text{ClN}_2$   $[\text{M}+\text{H}]^+$  345.1153; found: 345.1152.

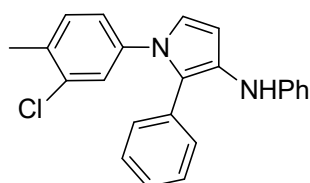

### 1-(3-chloro-4-methylphenyl)-N,2-diphenyl-1H-pyrrol-3-amine (3ha)

Yellow oil (111.0 mg, 62% yield).  $^1\text{H}$  NMR (400 MHz,  $\text{CDCl}_3$ , ppm):  $\delta$  = 7.25-7.18 (m, 6 H), 7.11-7.07 (m, 3 H), 6.89-6.79 (m, 3 H), 6.77-6.74 (m, 2 H), 6.42-6.41 (m, 1 H), 5.23 (s, 1 H), 2.34 (s, 3 H);  $^{13}\text{C}$  NMR (100 MHz,  $\text{CDCl}_3$ , ppm):  $\delta$  = 147.9, 139.9, 135.1, 134.8, 131.7, 131.6, 130.4, 130.0, 129.2, 127.5, 126.7, 126.2, 125.8, 124.4, 122.4, 119.0, 114.8, 107.5, 20.4. HRMS calcd for  $\text{C}_{23}\text{H}_{20}\text{ClN}_2$   $[\text{M}+\text{H}]^+$  359.1310;

found: 359.1310.

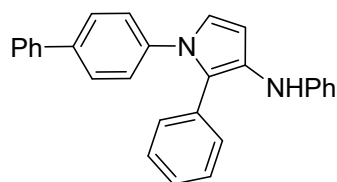

### 1-([1,1'-biphenyl]-4-yl)-N,2-diphenyl-1H-pyrrol-3-amine (3ia)

Yellow oil (140.8 mg, 73% yield). <sup>1</sup>H NMR (400 MHz, CDCl<sub>3</sub>, ppm): δ = 7.58-7.50 (m, 4 H), 7.46-7.41 (m, 2 H), 7.36-7.34 (m, 1 H), 7.25-7.13 (m, 9 H), 6.95-6.89 (m, 3 H), 6.80-6.75 (m, 1 H), 6.45-6.44 (d, *J* = 4.0 Hz, 1 H), 5.27 (s, 1 H); <sup>13</sup>C NMR (100 MHz, CDCl<sub>3</sub>, ppm): δ = 148.6, 141.4, 141.0, 140.3, 131.0, 130.6, 130.2, 129.7, 128.9, 128.8, 128.3, 128.0, 126.7, 123.1, 119.5, 115.4, 108.0. HRMS calcd for C<sub>28</sub>H<sub>23</sub>N<sub>2</sub> [M+H]<sup>+</sup> 387.1856; found: 387.1856.

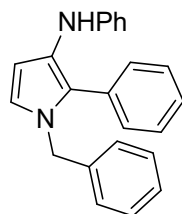

### 1-benzyl-N,2-diphenyl-1H-pyrrol-3-amine (3ja)

Yellow oil (60.1 mg, 37% yield). <sup>1</sup>H NMR (400 MHz, CDCl<sub>3</sub>, ppm): δ = 7.33-7.29 (m, 3 H), 7.27-7.26 (m, 2 H), 7.25-7.22 (m, 3 H), 7.18-7.14 (m, 3 H), 7.01-6.99 (d, *J* = 8.0 Hz, 2 H), 6.82-6.80 (d, *J* = 8.0 Hz, 2 H), 6.74-6.69 (m, 2 H), 6.30 (d, *J* = 3.2 Hz, 1 H), 5.13 (s, 1 H), 5.05 (s, 2 H); <sup>13</sup>C NMR (100 MHz, CDCl<sub>3</sub>, ppm): δ = 147.8, 138.6, 131.0, 129.9, 129.1, 128.6, 128.5, 127.3, 127.2, 127.1, 126.5, 123.8, 120.5, 117.7, 113.7, 105.9, 51.0. HRMS calcd for C<sub>23</sub>H<sub>21</sub>N<sub>2</sub> [M+H]<sup>+</sup> 325.1699; found: 325.1698.

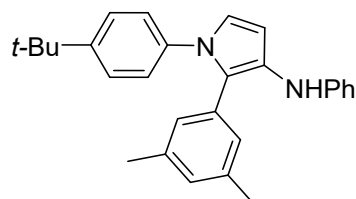

### 1-(4-(tert-butyl)phenyl)-2-(3,5-dimethylphenyl)-N-phenyl-1H-pyrrol-3-amine (3la)

Yellow oil (147.8 mg, 75% yield). <sup>1</sup>H NMR (400 MHz, CDCl<sub>3</sub>, ppm): δ = 7.30-7.25

(m, 2 H), 7.22-7.18 (m, 2 H), 7.04-7.02 (m, 2 H), 6.91-6.89 (m, 2 H), 6.86 (d,  $J = 3.2$  Hz, 1 H), 6.79-6.74 (m, 2 H), 6.68 (s, 2 H), 6.41-6.40 (d,  $J = 4.0$  Hz, 1 H), 5.27 (s, 1 H), 2.14 (s, 6 H), 1.30 (s, 9 H);  $^{13}\text{C}$  NMR (100 MHz,  $\text{CDCl}_3$ , ppm):  $\delta = 149.2, 147.4, 138.0, 137.5, 133.9, 131.1, 130.6, 129.1, 128.1, 127.4, 125.6, 124.9, 121.3, 118.0, 114.2, 105.8, 34.5, 31.3, 21.2$ . HRMS calcd for  $\text{C}_{28}\text{H}_{31}\text{N}_2$   $[\text{M}+\text{H}]^+$  395.2482; found: 395.2482.

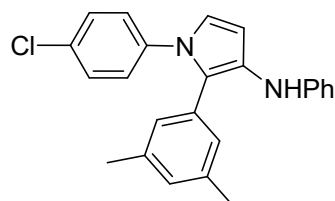

### 1-(4-chlorophenyl)-2-(3,5-dimethylphenyl)-*N*-phenyl-1*H*-pyrrol-3-amine (3ma)

Yellow oil (145.0 mg, 78% yield).  $^1\text{H}$  NMR (400 MHz,  $\text{CDCl}_3$ , ppm):  $\delta = 7.25-7.18$  (m, 4 H), 7.06-7.02 (m, 2 H), 6.90-6.88 (m, 2 H), 6.83 (d,  $J = 3.2$  Hz, 2 H), 6.79 -6.75 (m, 1 H), 6.69 (s, 2 H), 6.43-6.42 (d,  $J = 4.0$  Hz, 1 H), 5.27 (s, 1 H), 2.17 (s, 6 H);  $^{13}\text{C}$  NMR (100 MHz,  $\text{CDCl}_3$ , ppm):  $\delta = 147.0, 139.1, 137.9, 131.6, 130.7, 129.2, 129.0, 128.6, 127.5, 126.3, 126.2, 124.6, 121.2, 118.3, 114.3, 106.3, 21.3$ . HRMS calcd for  $\text{C}_{24}\text{H}_{22}\text{ClN}_2$   $[\text{M}+\text{H}]^+$  373.1466; found: 373.1468.

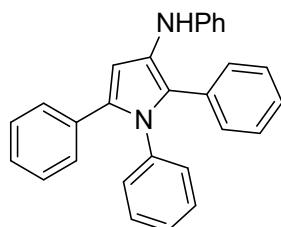

### *N*,1,2,5-tetraphenyl-1*H*-pyrrol-3-amine (3na)

Yellow solid (131.2 mg, 68% yield), melting point: 176-178 °C.  $^1\text{H}$  NMR (400 MHz,  $\text{CDCl}_3$ , ppm):  $\delta = 7.22-7.16$  (m, 7 H), 7.15-7.12 (m, 4 H), 7.08-7.06 (m, 2 H), 7.02-6.98 (m, 4 H), 6.94-6.92 (d,  $J = 8.0$  Hz, 2 H), 6.78-6.75 (m, 1 H), 6.58 (s, 1 H), 5.26 (s, 1 H);  $^{13}\text{C}$  NMR (100 MHz,  $\text{CDCl}_3$ , ppm):  $\delta = 147.0, 138.6, 133.1, 132.8, 131.1, 130.1, 129.2, 128.8, 128.6, 128.5, 128.0, 127.9, 127.0, 126.5, 126.4, 126.3, 125.1, 118.1, 114.1, 106.4$ . HRMS calcd for  $\text{C}_{28}\text{H}_{23}\text{N}_2$   $[\text{M}+\text{H}]^+$  387.1856; found: 387.1856.



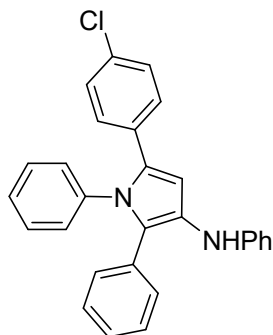

**5-(4-chlorophenyl)-N,1,2-triphenyl-1H-pyrrol-3-amine (30a)**

Yellow solid (132.3 mg, 63% yield), melting point: 185-187 °C. <sup>1</sup>H NMR (400 MHz, CDCl<sub>3</sub>, ppm): δ = 7.24-7.13 (m, 10 H), 7.04-6.98 (m, 6 H), 6.93-6.91 (d, *J* = 8.0 Hz, 2 H), 6.79-6.75 (m, 1 H), 6.56 (s, 1 H), 5.24 (s, 1 H); <sup>13</sup>C NMR (100 MHz, CDCl<sub>3</sub>, ppm): δ = 147.0, 138.5, 132.2, 131.9, 131.4, 131.0, 130.1, 129.7, 129.2, 128.8, 128.2, 128.1, 127.4, 127.2, 126.7, 125.3, 118.3, 114.2, 106.5. HRMS calcd for C<sub>28</sub>H<sub>22</sub>ClN<sub>2</sub> [M+H]<sup>+</sup> 421.1466; found: 421.1467.

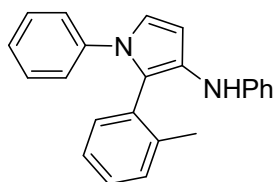

**N,1-diphenyl-2-(*o*-tolyl)-1H-pyrrol-3-amine (3pa)**

Yellow oil (119.5 mg, 73% yield). <sup>1</sup>H NMR (400 MHz, CDCl<sub>3</sub>, ppm): δ = 7.24-7.15 (m, 6 H), 7.13-7.09 (m, 2 H), 7.03-6.98 (m, 2 H), 6.89-6.85 (m, 4 H), 6.78-6.74 (m, 1 H), 6.41-6.40 (d, *J* = 4.0 Hz, 1 H), 5.23 (s, 1 H), 2.28 (s, 3 H); <sup>13</sup>C NMR (100 MHz, CDCl<sub>3</sub>, ppm): δ = 147.4, 140.4, 138.9, 131.2, 129.6, 129.2, 128.7, 128.2, 127.0, 126.5, 125.7, 125.6, 125.2, 122.5, 121.7, 118.0, 114.0, 106.4, 21.3. HRMS calcd for C<sub>23</sub>H<sub>21</sub>N<sub>2</sub> [M+H]<sup>+</sup> 325.1699; found: 325.1699.

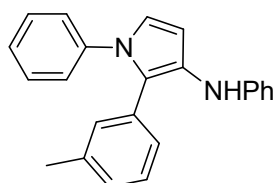

**N,1-diphenyl-2-(*m*-tolyl)-1H-pyrrol-3-amine (3qa)**

Yellow oil (119.8 mg, 74% yield). <sup>1</sup>H NMR (400 MHz, CDCl<sub>3</sub>, ppm): 7.31-7.26 (m, 3 H), 7.23-7.18 (m, 3 H), 7.13-7.07 (m, 3 H), 6.99-7.96 (m, 1 H), 6.92-6.85 (m, 4 H),

6.79-6.74 (m, 1 H), 6.43-6.42 (d,  $J = 4.0$  Hz, 1 H), 5.26 (s, 1 H), 2.19 (s, 3 H);  $^{13}\text{C}$  NMR (100 MHz,  $\text{CDCl}_3$ , ppm):  $\delta = 147.3, 140.5, 137.8, 131.1, 130.3, 129.2, 128.9, 128.1, 127.3, 126.8, 126.1, 125.2, 125.0, 121.5, 118.1, 114.1, 106.3, 100.0, 21.4$ . HRMS calcd for  $\text{C}_{23}\text{H}_{21}\text{N}_2$   $[\text{M}+\text{H}]^+$  325.1699; found: 325.1698.

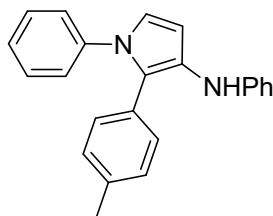

### ***N*,1-diphenyl-2-(*p*-tolyl)-1*H*-pyrrol-3-amine (3ra)**

Yellow oil (134.5 mg, 83% yield).  $^1\text{H}$  NMR (400 MHz,  $\text{CDCl}_3$ , ppm):  $\delta = 7.31-7.27$  (m, 2 H), 7.25-7.19 (m, 3 H), 7.14-7.12 (d,  $J = 8.0$  Hz, 2 H), 7.04-6.97 (m, 4 H), 6.90-6.88 (m, 3 H), 6.79-6.75 (m, 1 H), 6.42 (d,  $J = 3.2$  Hz, 1 H), 5.22 (s, 1 H), 2.29 (s, 3 H);  $^{13}\text{C}$  NMR (100 MHz,  $\text{CDCl}_3$ , ppm):  $\delta = 147.4, 140.5, 136.3, 129.5, 129.2, 129.0, 128.9, 128.1, 126.1, 126.0, 125.4, 125.3, 121.4, 118.0, 114.0, 106.5, 21.2$ . HRMS calcd for  $\text{C}_{23}\text{H}_{21}\text{N}_2$   $[\text{M}+\text{H}]^+$  325.1699; found: 325.1700.

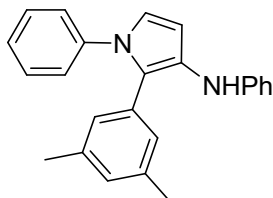

### **2-(3,5-dimethylphenyl)-*N*,1-diphenyl-1*H*-pyrrol-3-amine (3sa)**

Yellow oil (125.0 mg, 74% yield).  $^1\text{H}$  NMR (400 MHz,  $\text{CDCl}_3$ , ppm):  $\delta = 7.30-7.25$  (m, 2 H), 7.22-7.18 (m, 3 H), 7.12-7.10 (m, 2 H), 6.91-6.87 (m, 3 H), 6.80 (s, 1 H), 6.78-6.74 (m, 1 H), 6.69 (s, 2 H), 6.42 (d,  $J = 2.8$  Hz, 1 H), 5.28 (s, 1 H), 2.15 (s, 6 H);  $^{13}\text{C}$  NMR (100 MHz,  $\text{CDCl}_3$ , ppm):  $\delta = 147.2, 140.5, 137.6, 130.9, 129.2, 128.8, 128.3, 127.4, 126.0, 125.8, 125.1, 124.7, 121.3, 118.1, 114.2, 106.0, 21.3$ . HRMS calcd for  $\text{C}_{24}\text{H}_{23}\text{N}_2$   $[\text{M}+\text{H}]^+$  339.1856; found: 339.1854.

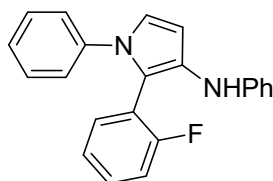

### **2-(2-fluorophenyl)-*N*,1-diphenyl-1*H*-pyrrol-3-amine (3ta)**

Yellow solid (102.4 mg, 78% yield), melting point: 140-142 °C. <sup>1</sup>H NMR (400 MHz, CDCl<sub>3</sub>, ppm): δ = 7.28-7.16 (m, 8 H), 7.14-7.02 (m, 1 H), 6.99-6. 6.87 (m, 3 H), 6.85-6.84 (d, *J* = 4.0 Hz, 2 H), 6.75-6.70 (m, 1 H), 6.45-6.44 (d, *J* = 4.0 Hz, 1 H), 5.33 (s, 1 H); <sup>13</sup>C NMR (100 MHz, CDCl<sub>3</sub>, ppm): δ = 161.5-158.2 (*J* = 326.0 Hz, 1 C), 146.8, 140.5, 132.3 (*J* = 4.0 Hz, 1 C), 129.2, 129.1-129.0 (*J* = 7.0 Hz, 1 C), 127.5, 126.2, 124.1, 124.0, 122.2, 119.4, 119.0, 118.1, 116.0, 115.7, 114.1, 106.2. HRMS calcd for C<sub>22</sub>H<sub>18</sub>FN<sub>2</sub> [M+H]<sup>+</sup> 329.1449; found: 329.1449.

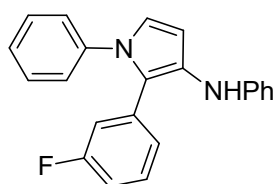

### 2-(3-fluorophenyl)-*N*,1-diphenyl-1*H*-pyrrol-3-amine (3ua)

Yellow solid (121.4 mg, 74% yield), melting point: 142-144 °C. <sup>1</sup>H NMR (400 MHz, CDCl<sub>3</sub>, ppm): δ = 7.33-7.20 (m, 6 H), 7.18-7.10 (m, 3 H), 6.91-6.88 (m, 3 H), 6.86 (m, 1 H), 6.81-6.80 (m, 1 H), 6.78-6.75 (m, 1 H), 6.41-6.40 (d, *J* = 4.0 Hz, 1 H), 5.22 (s, 1 H); <sup>13</sup>C NMR (100 MHz, CDCl<sub>3</sub>, ppm): δ = 164.2-160.9 (*J* = 325.0 Hz, 1 C), 147.0, 140.1, 133.3-133.2 (*J* = 12.0 Hz, 1 C), 129.7, 129.6, 129.2-129.1 (*J* = 15.0 Hz, 1 C), 126.5-126.4 (*J* = 10.0 Hz, 1 C), 125.2 (*J* = 8.0 Hz, 1 C), 124.0, 122.4, 118.3, 116.3, 116.0, 114.1, 113.5, 113.2, 106.6. HRMS calcd for C<sub>22</sub>H<sub>18</sub>FN<sub>2</sub> [M+H]<sup>+</sup> 329.1449; found: 329.1450.

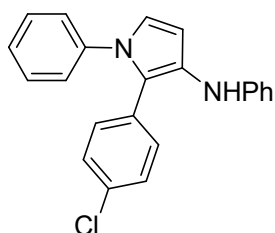

### 2-(4-chlorophenyl)-*N*,1-diphenyl-1*H*-pyrrol-3-amine (3va)

Yellow oil (126.8 mg, 82% yield). <sup>1</sup>H NMR (400 MHz, CDCl<sub>3</sub>, ppm): δ = 7.32-7.29 (m, 2 H), 7.26-7.24 (m, 1 H), 7.22-7.15 (m, 4 H), 7.11-7.10 (d, *J* = 4.0 Hz, 2 H), 7.02-7.00 (d, *J* = 8.0 Hz, 2 H), 6.90 (d, *J* = 2.8 Hz, 1 H), 6.86-6.84 (m, 2 H), 6.79-6.75 (m, 1 H), 6.40 (d, *J* = 2.8 Hz, 1 H), 5.14 (s, 1 H); <sup>13</sup>C NMR (100 MHz, CDCl<sub>3</sub>, ppm): δ = 147.3, 140.3, 132.5, 130.8, 129.7, 129.3, 129.2, 128.6, 126.6, 126.2, 125.4, 124.5,

122.3, 118.4, 114.1, 106.9. HRMS calcd for C<sub>22</sub>H<sub>18</sub>ClN<sub>2</sub> [M+H]<sup>+</sup> 345.1153; found: 345.1153.

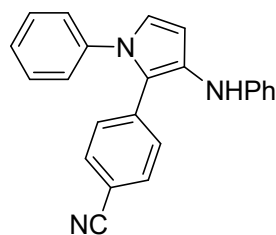

#### 4-(1-phenyl-3-(phenylamino)-1H-pyrrol-2-yl)benzonitrile (3wa)

Yellow solid (142.3 mg, 85% yield), melting point: 142-144 °C. <sup>1</sup>H NMR (400 MHz, CDCl<sub>3</sub>, ppm): δ = 7.45-7.43 (d, *J* = 8.0 Hz, 2 H), 7.35-7.28 (m, 3 H), 7.24-7.16 (m, 4 H), 7.12-7.10 (d, *J* = 8.0 Hz, 2 H), 6.94-6.93 (d, *J* = 4.0 Hz, 1 H), 6.85-6.83 (d, *J* = 8.0 Hz, 2 H), 6.81-6.77 (m, 1 H), 6.41-6.40 (d, *J* = 4.0 Hz, 1 H), 5.19 (s, 1 H); <sup>13</sup>C NMR (100 MHz, CDCl<sub>3</sub>, ppm): δ = 146.7, 139.9, 135.8, 131.9, 129.4, 129.3, 127.7, 126.9, 125.3, 123.9, 123.7, 118.9, 118.7, 114.2, 109.3, 107.1. HRMS calcd for C<sub>23</sub>H<sub>18</sub>N<sub>3</sub> [M+H]<sup>+</sup> 336.1495; found: 336.1496.

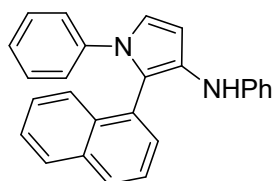

#### 2-(naphthalen-1-yl)-N,1-diphenyl-1H-pyrrol-3-amine (3xa)

Yellow oil (139.9 mg, 80% yield). <sup>1</sup>H NMR (400 MHz, CDCl<sub>3</sub>, ppm): δ = 7.82-7.74 (m, 3 H), 7.41-7.30 (m, 3 H), 7.23-7.20 (m, 1 H), 7.15-6.99 (m, 8 H), 6.85-6.81 (m, 2 H), 6.73-6.71 (m, 1 H), 6.57-6.55 (m, 1 H), 5.06 (s, 1 H); <sup>13</sup>C NMR (100 MHz, CDCl<sub>3</sub>, ppm): δ = 146.4, 140.4, 133.7, 132.6, 129.8, 129.0, 128.9, 128.7, 128.3, 128.1, 127.4, 126.4, 126.0, 125.9, 125.8, 125.3, 124.2, 121.8, 121.2, 118.1, 114.2, 105.3. HRMS calcd for C<sub>26</sub>H<sub>21</sub>N<sub>2</sub> [M+H]<sup>+</sup> 361.1699; found: 361.1700.

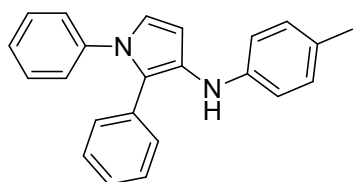

#### 1,2-diphenyl-N-(p-tolyl)-1H-pyrrol-3-amine (3ab)

Yellow oil (141.0 mg, 87% yield).  $^1\text{H}$  NMR (400 MHz,  $\text{CDCl}_3$ , ppm):  $\delta$  = 7.30-7.25 (m, 2 H), 7.23-7.19 (m, 3 H), 7.17-7.15 (m, 1 H), 7.12-7.08 (m, 4 H), 7.03-7.01 (d,  $J$  = 8.0 Hz, 2 H), 6.89-6.88 (d,  $J$  = 4.0 Hz, 1 H), 6.82-6.80 (d,  $J$  = 8.0 Hz, 2 H), 6.40 (d,  $J$  = 2.8 Hz, 1 H), 5.16 (s, 1 H), 2.27 (s, 3 H);  $^{13}\text{C}$  NMR (100 MHz,  $\text{CDCl}_3$ , ppm):  $\delta$  = 145.0, 140.6, 131.3, 129.8, 129.7, 129.0, 128.3, 127.5, 126.6, 126.5, 126.3, 125.3, 124.8, 121.8, 114.4, 106.3, 20.5. HRMS calcd for  $\text{C}_{23}\text{H}_{21}\text{N}_2$   $[\text{M}+\text{H}]^+$  325.1699; found: 325.1698.

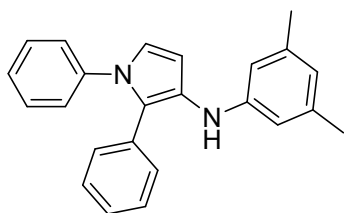

***N*-(3,5-dimethylphenyl)-1,2-diphenyl-1*H*-pyrrol-3-amine (3ac)**

Yellow oil (113.2 mg, 67% yield).  $^1\text{H}$  NMR (400 MHz,  $\text{CDCl}_3$ , ppm):  $\delta$  = 7.32-7.18 (m, 6 H), 7.16-7.08 (m, 4 H), 6.91-6.90 (d,  $J$  = 4.0 Hz, 1 H), 6.55 (s, 2 H), 6.44-6.43 (d,  $J$  = 4.0 Hz, 2 H), 5.18 (s, 1 H), 2.26 (s, 6 H);  $^{13}\text{C}$  NMR (100 MHz,  $\text{CDCl}_3$ , ppm):  $\delta$  = 147.2, 140.5, 138.9, 131.2, 129.7, 128.9, 128.3, 126.5, 126.2, 126.0, 125.3, 124.8, 121.7, 120.1, 111.9, 106.5, 21.5. HRMS calcd for  $\text{C}_{24}\text{H}_{23}\text{N}_2$   $[\text{M}+\text{H}]^+$  339.1856; found: 339.1858.

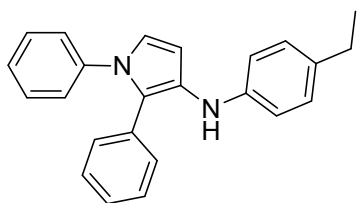

***N*-(4-ethylphenyl)-1,2-diphenyl-1*H*-pyrrol-3-amine (3ad)**

Yellow oil (144.1 mg, 85% yield).  $^1\text{H}$  NMR (400 MHz,  $\text{CDCl}_3$ , ppm):  $\delta$  = 7.29-7.24 (m, 2 H), 7.22-7.19 (m, 3 H), 7.16-7.15 (m, 1 H), 7.12-7.10 (m, 4 H), 7.08-7.03 (m, 2 H), 6.89-6.88 (d,  $J$  = 2.8 Hz, 1 H), 6.85-6.83 (d,  $J$  = 8.0 Hz, 2 H), 6.41 (d,  $J$  = 3.2 Hz, 1 H), 5.19 (s, 1 H), 2.60-2.54 (m, 2 H), 1.23-1.19 (m, 3 H);  $^{13}\text{C}$  NMR (100 MHz,  $\text{CDCl}_3$ , ppm):  $\delta$  = 145.0, 140.5, 134.1, 131.3, 129.6, 128.9, 128.5, 128.2, 126.5, 126.4, 126.1, 125.2, 124.6, 121.7, 114.3, 106.2, 28.0, 15.9. HRMS calcd for  $\text{C}_{24}\text{H}_{23}\text{N}_2$   $[\text{M}+\text{H}]^+$  339.1856; found: 339.1857.

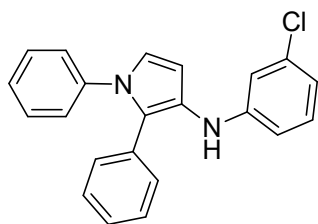

***N*-(3-chlorophenyl)-1,2-diphenyl-1*H*-pyrrol-3-amine (3ae)**

Yellow oil (142.8 mg, 83% yield). <sup>1</sup>H NMR (400 MHz, CDCl<sub>3</sub>, ppm): δ = 7.30-7.26 (m, 2 H), 7.23-7.15 (m, 4 H), 7.12-7.05 (m, 5 H), 6.90-6.89 (d, *J* = 4.0 Hz, 1 H), 6.86-6.85 (m, 1 H), 6.71-6.68 (m, 2 H), 6.38-6.37 (d, *J* = 4.0 Hz, 1 H), 5.24 (s, 1 H); <sup>13</sup>C NMR (100 MHz, CDCl<sub>3</sub>, ppm): δ = 148.7, 140.3, 135.0, 130.9, 130.1, 129.6, 129.0, 128.3, 126.7, 126.4, 126.0, 125.3, 124.6, 121.9, 117.9, 113.5, 112.1, 106.8. HRMS calcd for C<sub>22</sub>H<sub>18</sub>ClN<sub>2</sub> [M+H]<sup>+</sup> 345.1153; found: 345.1153.

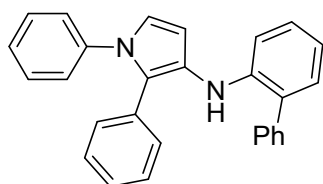

***N*-([1,1'-biphenyl]-4-yl)-1,2-diphenyl-1*H*-pyrrol-3-amine (3af)**

Yellow oil (150.5 mg, 78% yield). <sup>1</sup>H NMR (400 MHz, CDCl<sub>3</sub>, ppm): δ = 7.40-7.34 (m, 4 H), 7.28-7.24 (m, 3 H), 7.22-7.18 (m, 2 H), 7.15-7.08 (m, 7 H), 7.00-6.98 (m, 2 H), 6.89-6.88 (d, *J* = 4.0 Hz, 1 H), 6.82-6.78 (m, 1 H), 6.41-6.40 (d, *J* = 4.0 Hz, 1 H), 5.54 (s, 1 H); <sup>13</sup>C NMR (100 MHz, CDCl<sub>3</sub>, ppm): δ = 144.3, 140.5, 139.3, 131.1, 130.2, 129.5, 129.4, 128.9, 128.8, 128.5, 128.1, 127.9, 127.2, 126.4, 126.2, 125.9, 125.6, 125.2, 121.7, 117.7, 112.7, 107.0. HRMS calcd for C<sub>28</sub>H<sub>23</sub>N<sub>2</sub> [M+H]<sup>+</sup> 387.1856; found: 387.1857.

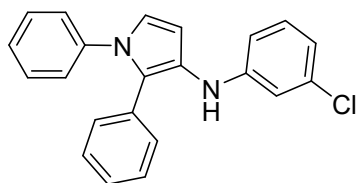

***N*-(4-chlorophenyl)-2-(3,5-dimethylphenyl)-1-(*p*-tolyl)-1*H*-pyrrol-3-amine (3ke)**

Yellow oil (129.3 mg, 67% yield). <sup>1</sup>H NMR (400 MHz, CDCl<sub>3</sub>, ppm): δ = 7.24-7.23 (m, 1 H), 7.10-7.07 (m, 4 H), 7.02-7.00 (d, *J* = 8.0 Hz, 2 H), 6.86-6.85 (d, *J* = 4.0 Hz,

1 H), 6.78 (s, 1 H), 6.68 (s, 2 H), 6.66-6.62 (m, 1 H), 6.38 (d,  $J = 3.2$  Hz, 1 H), 5.90 (s, 1 H), 2.33 (s, 3 H), 2.14 (s, 6 H);  $^{13}\text{C}$  NMR (100 MHz,  $\text{CDCl}_3$ , ppm):  $\delta = 143.5, 138.1, 137.5, 136.0, 130.7, 129.4, 129.1, 128.3, 127.5, 127.2, 126.1, 125.1, 124.2, 121.5, 119.1, 117.9, 113.4, 106.6, 29.7, 21.2, 20.9$ . HRMS calcd for  $\text{C}_{25}\text{H}_{24}\text{ClN}_2$   $[\text{M}+\text{H}]^+$  387.1623; found: 387.1623.

## Reference:

- (1) F. Fang, M. Vogel, J. V. Hines, S. C. Bergmeier, *Org. Biomol. Chem.* **2012**, 10, 3080.
- (2) C. Gronnier, Y. Odabachian, F. Gagosz, *Chem. Commun.* **2011**, 47, 218.
- (3) J. L. García Ruano, J. Alemán, I. Alonso, A. Parra, V. Marcos, J. Aguirre, *Chem.-Eur. J.* **2007**, 13, 6179-6195.
- (4) S. Wang, L. Zhang, *J. Am. Chem. Soc.* **2006**, 128, 14274-14275.
- (5) Dolomanov, O. V.; Bourhis, L. J.; Gildea, R. J.; Howard, J. A. K.; and Puschmann, H. OLEX2: A Complete Structure Solution, Refinement and Analysis Program *J. Appl. Cryst.* **2009**, 42, 339-341.
- (6) Sheldrick, G.M. A Short History of SHELX. *Acta Cryst. A.* **2008**, 64, 112-122.
- (7) Sheldrick, G.M. Crystal Structure Refinement with SHELXL. *Acta Cryst. C.* **2015**, 71, 3-8.
- (8) Yan, R. Cu-Catalyzed Tandem Aerobic Oxidative Cyclization for the Synthesis of 3,3'-Bipyrroles from the Homopropargylic Amines. *Org. Lett.* **2018**, 20, 5048-5052.



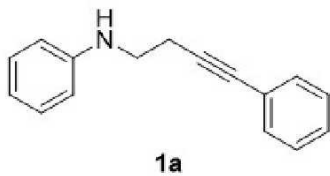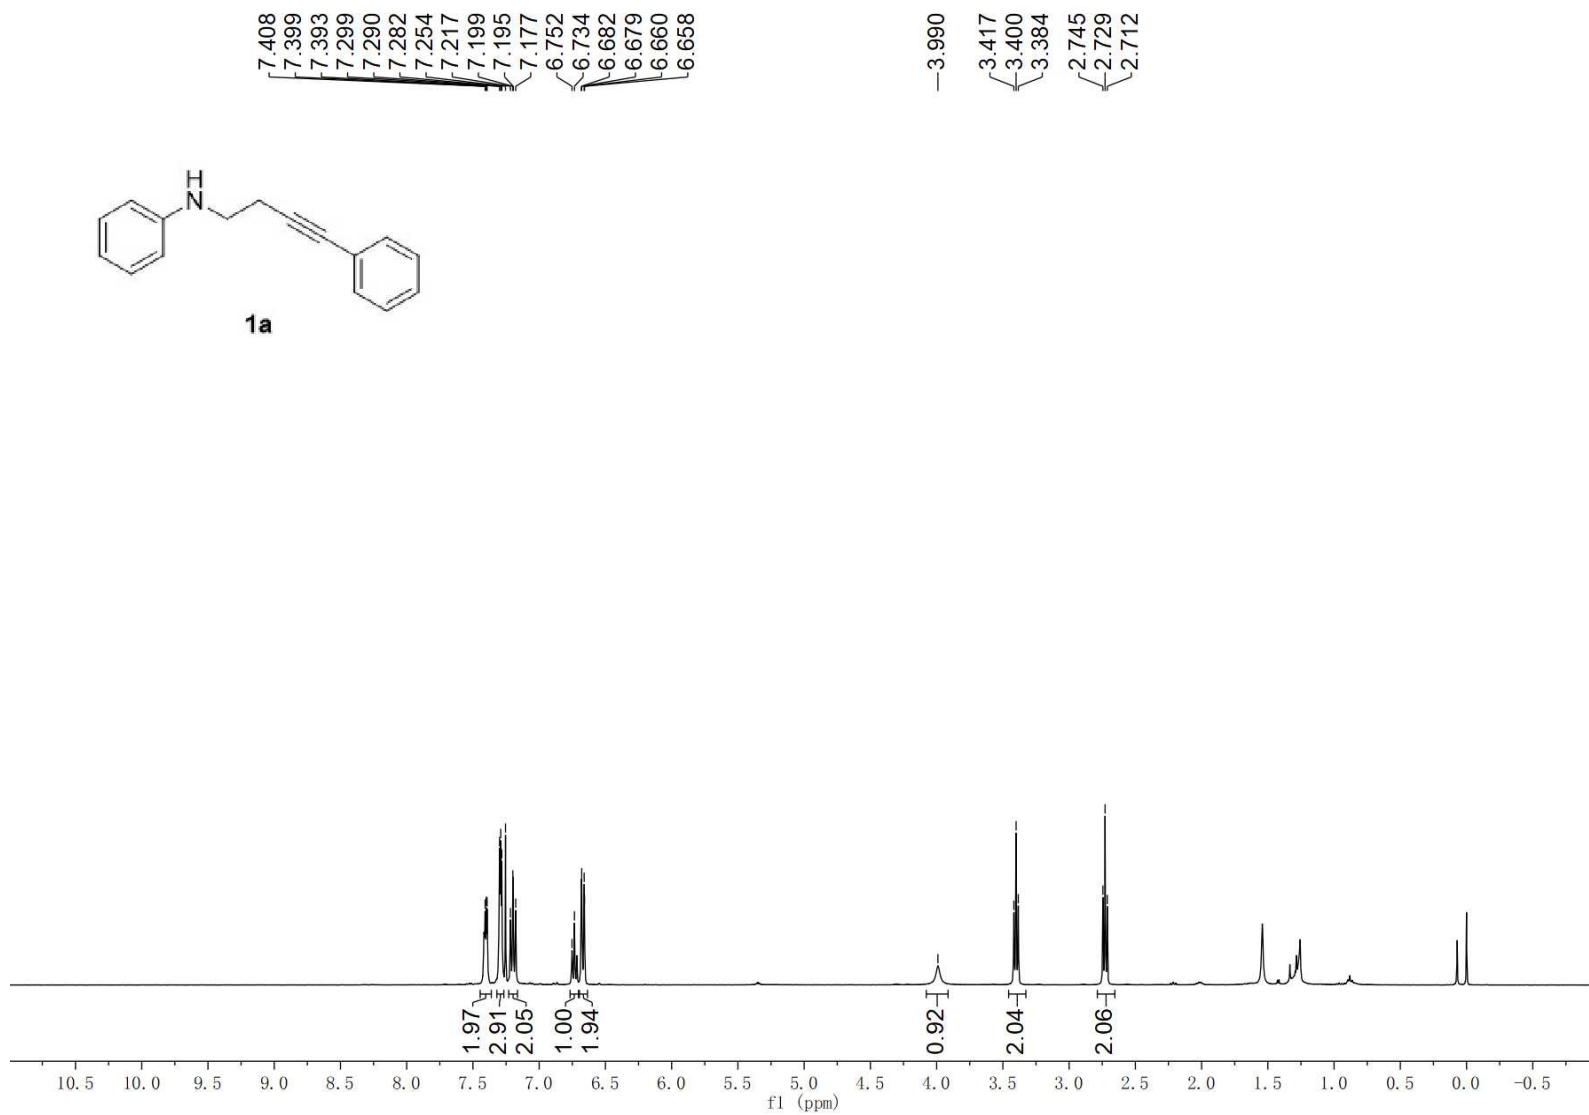

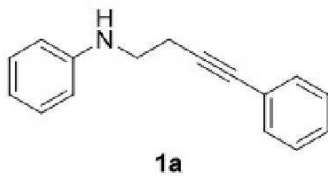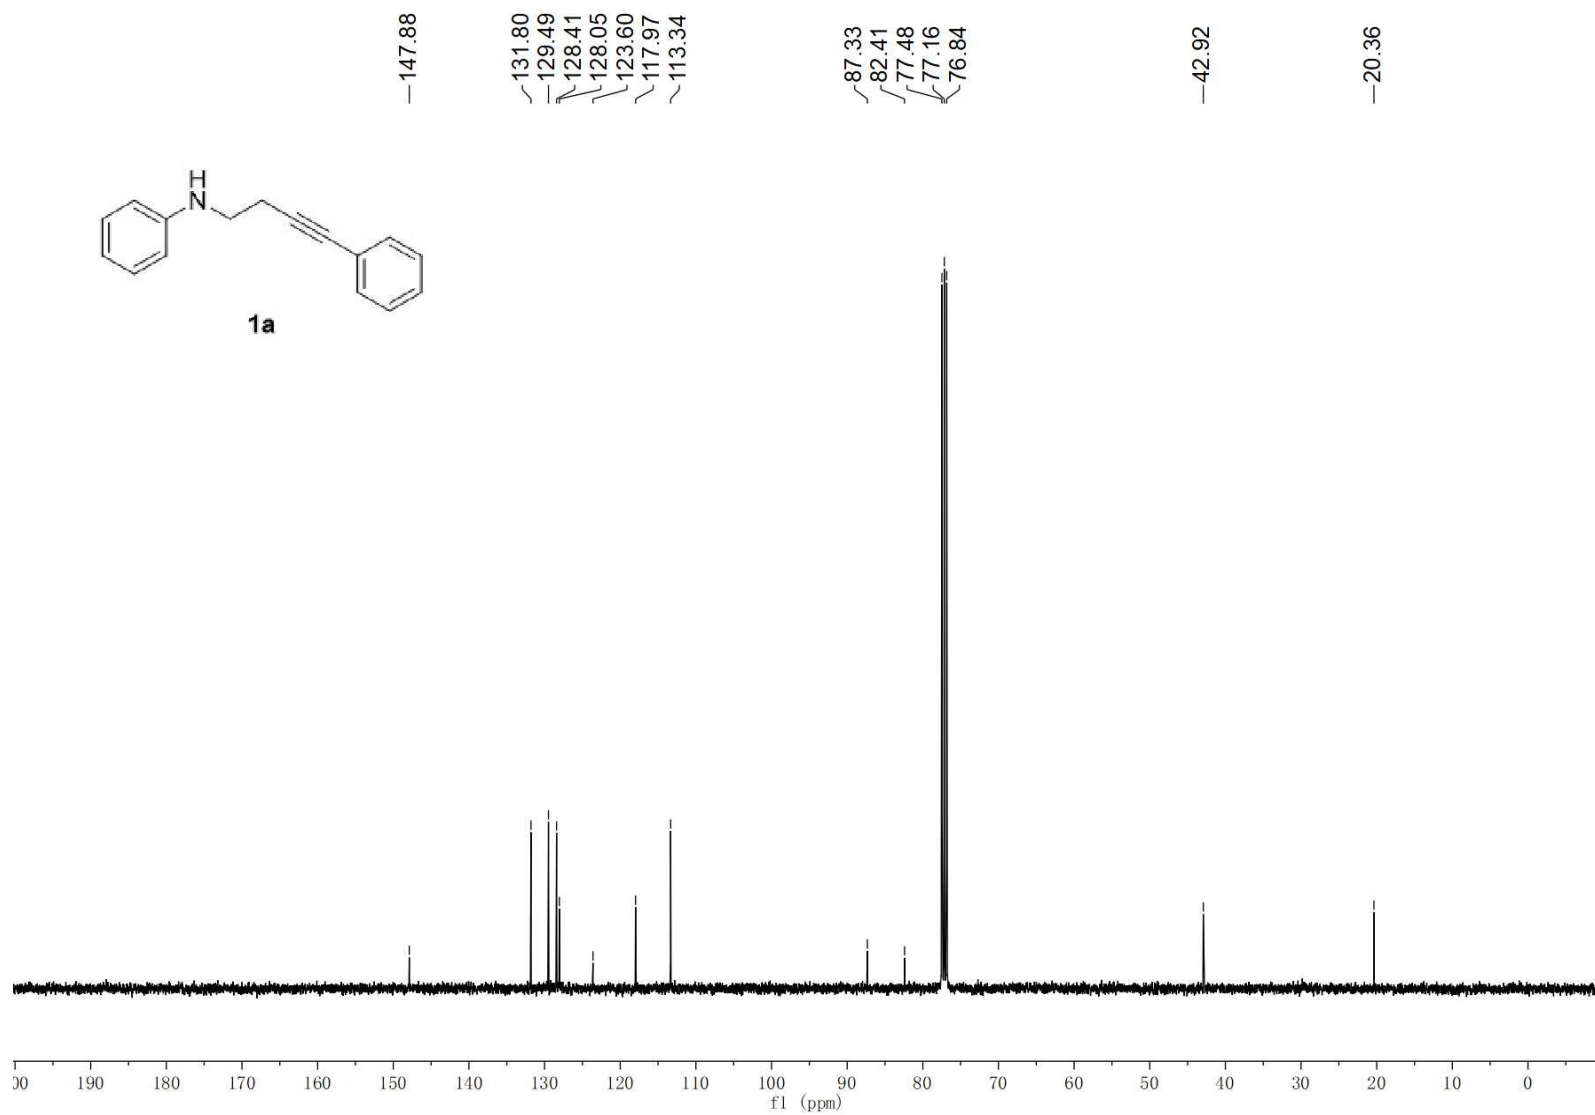

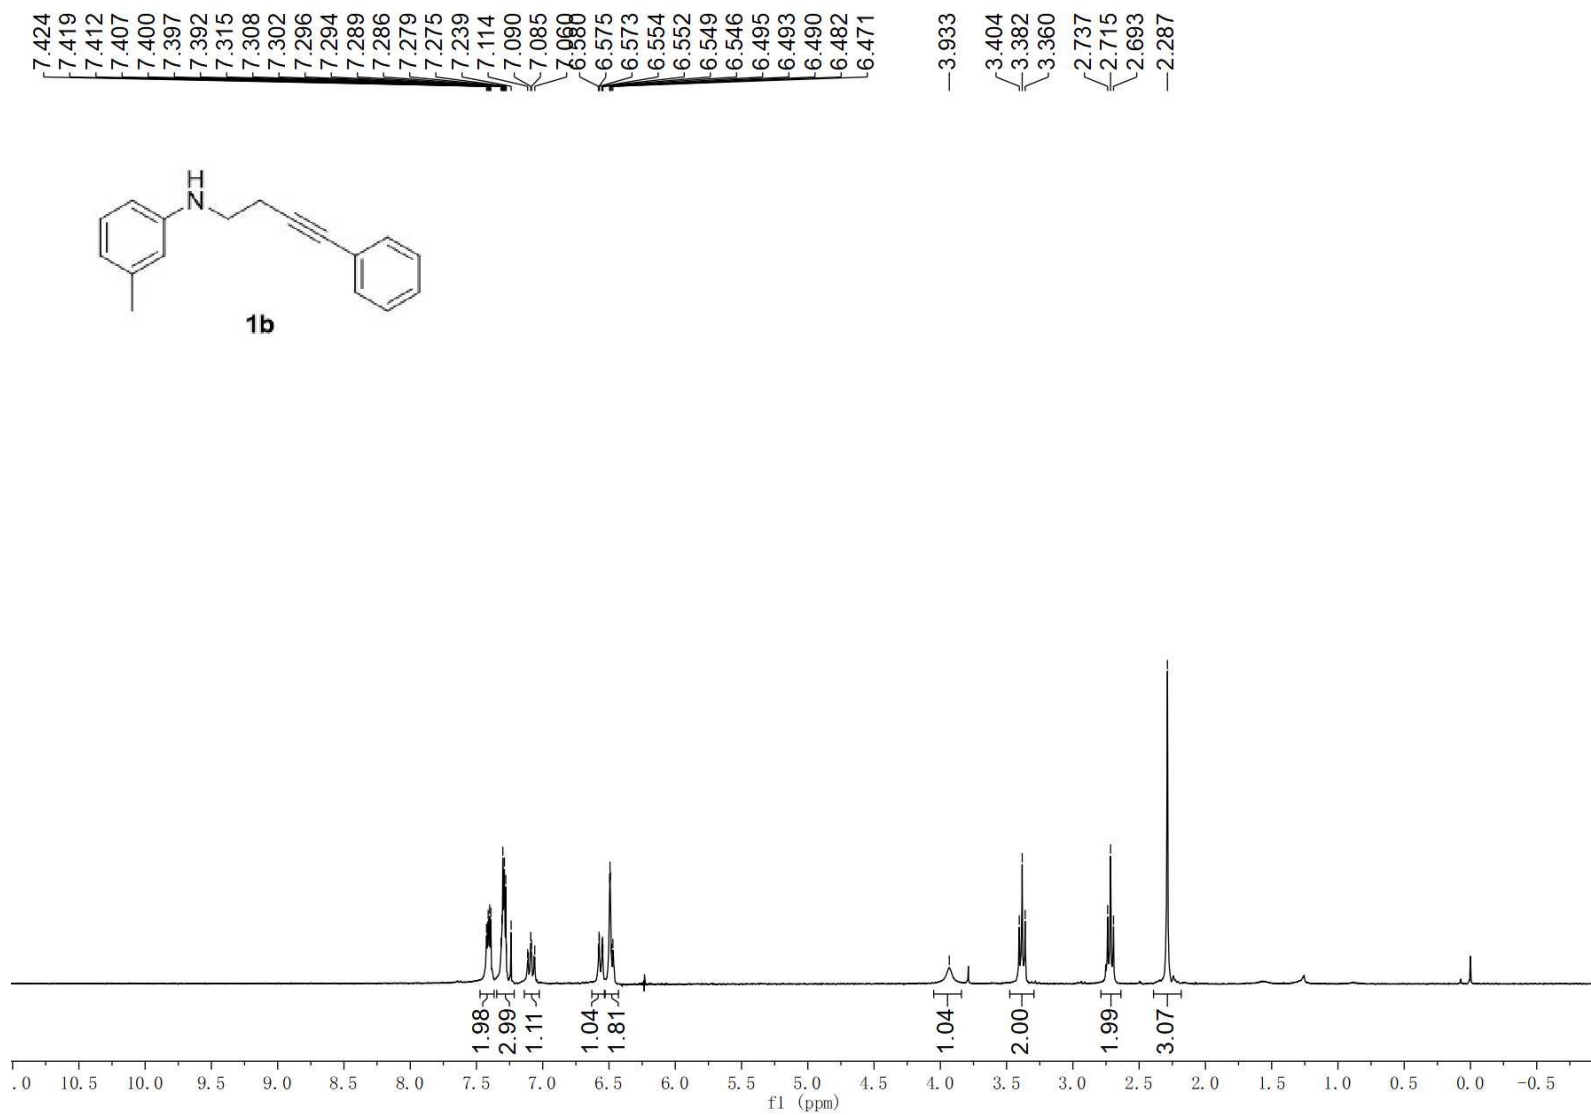

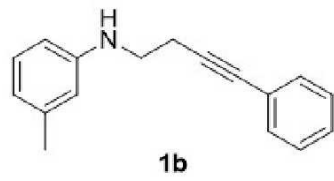

147.84  
139.26  
131.76  
129.33  
128.39  
128.02  
123.54  
118.85  
114.06  
110.40  
87.39  
82.31  
77.58  
77.16  
76.74  
42.86  
21.77  
20.32

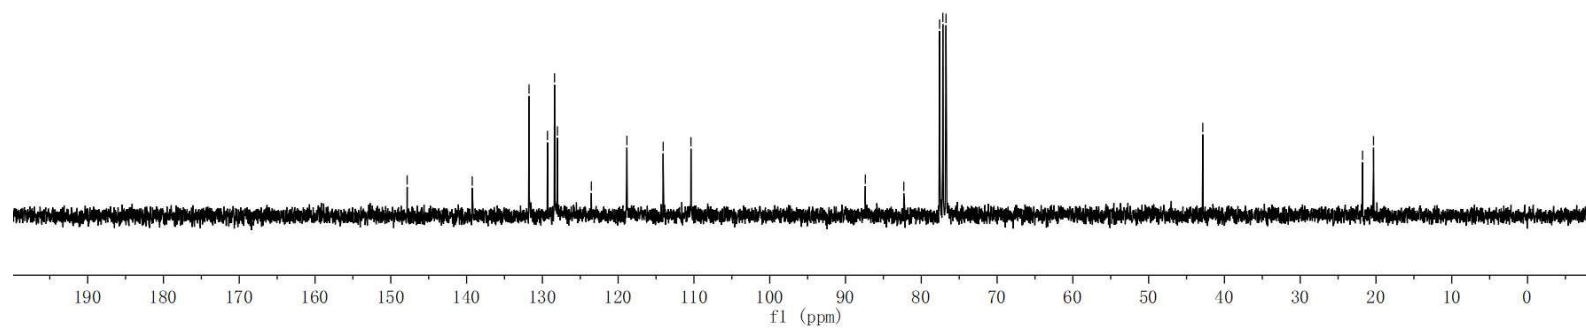

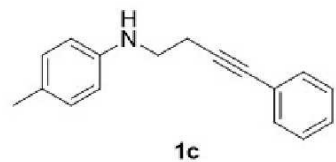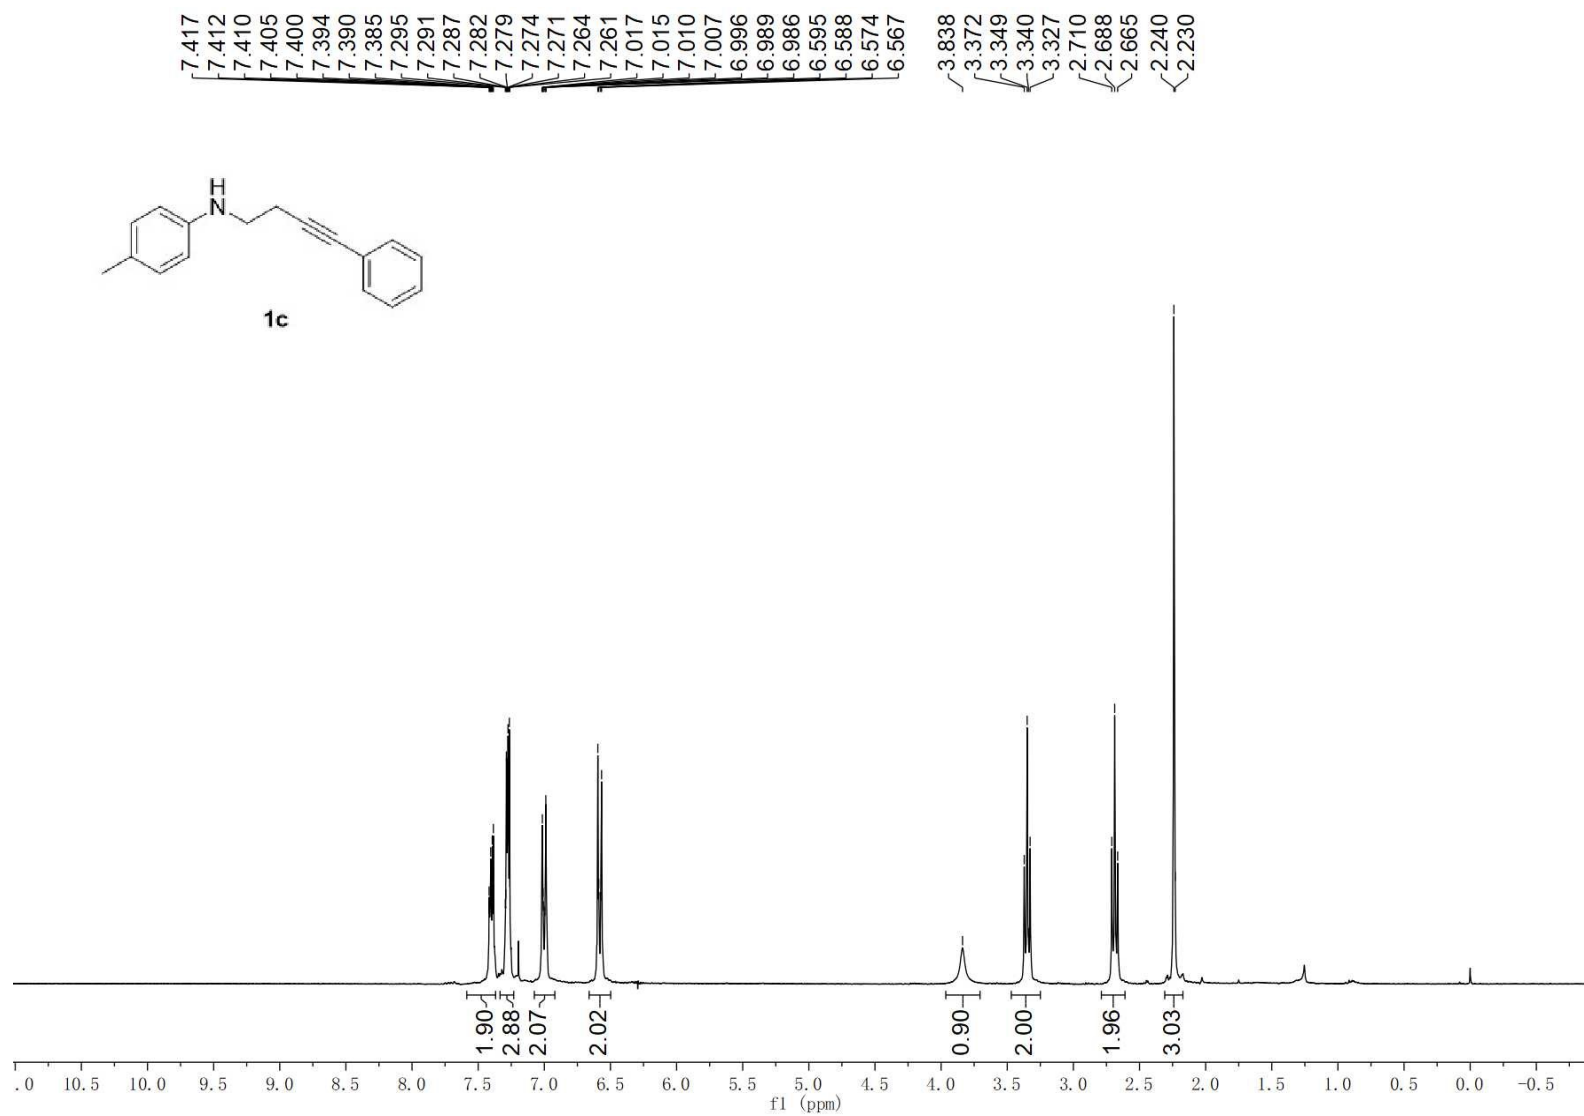

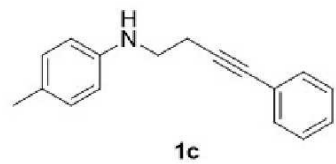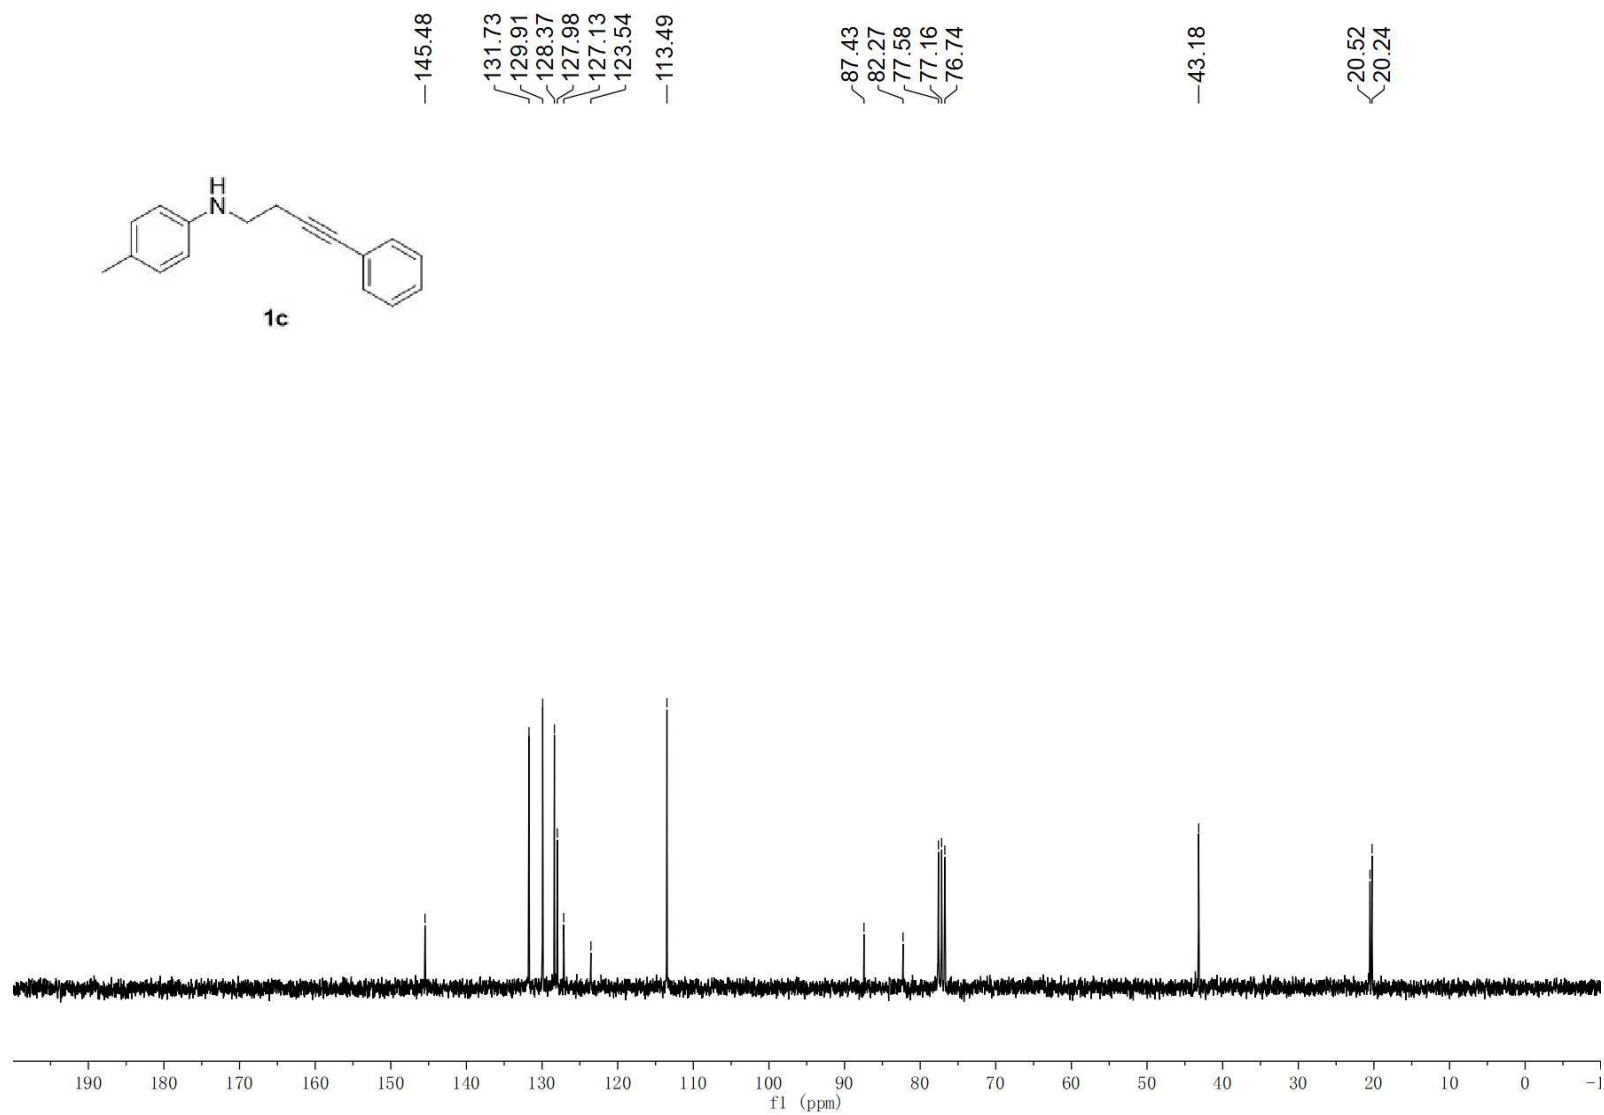

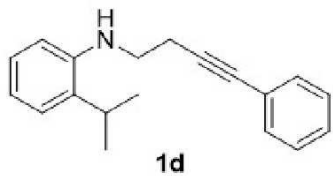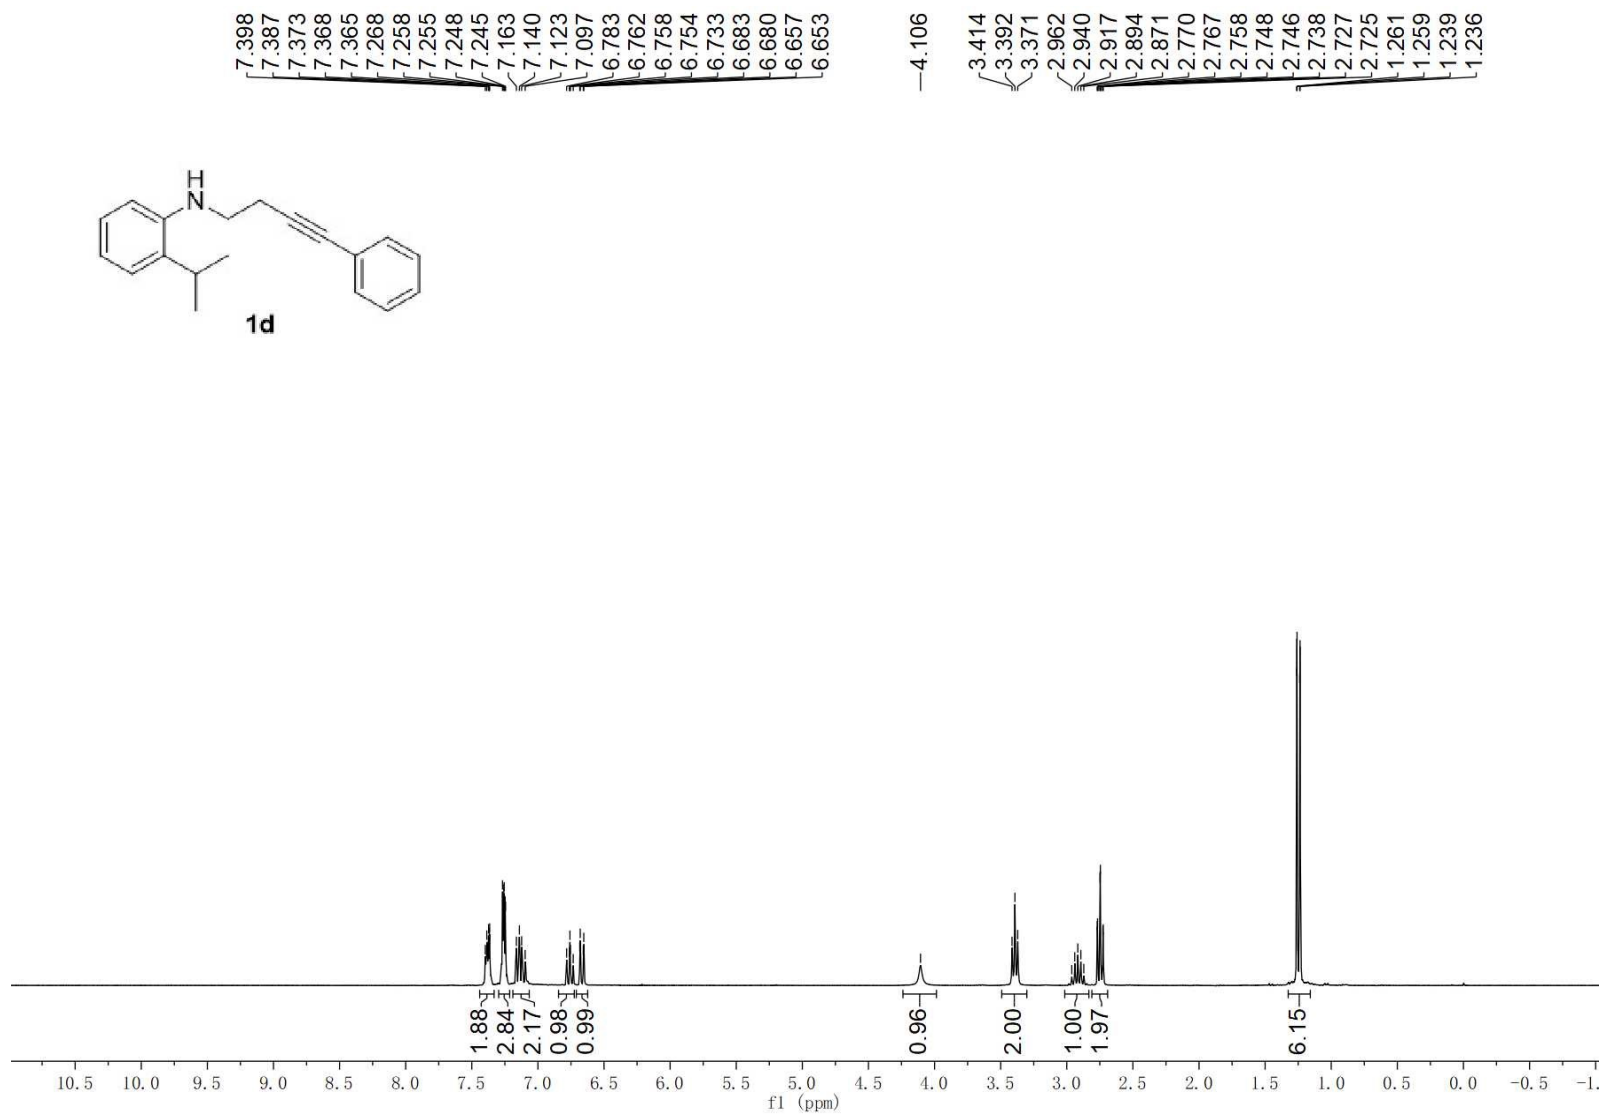

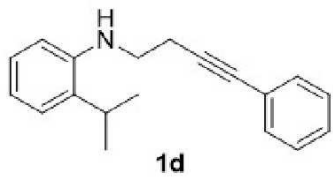

144.53  
132.74  
131.66  
128.36  
127.99  
126.86  
125.18  
123.48  
117.79  
110.80

87.44  
82.56  
77.47  
77.16  
76.84

42.79

27.30  
22.43  
20.13

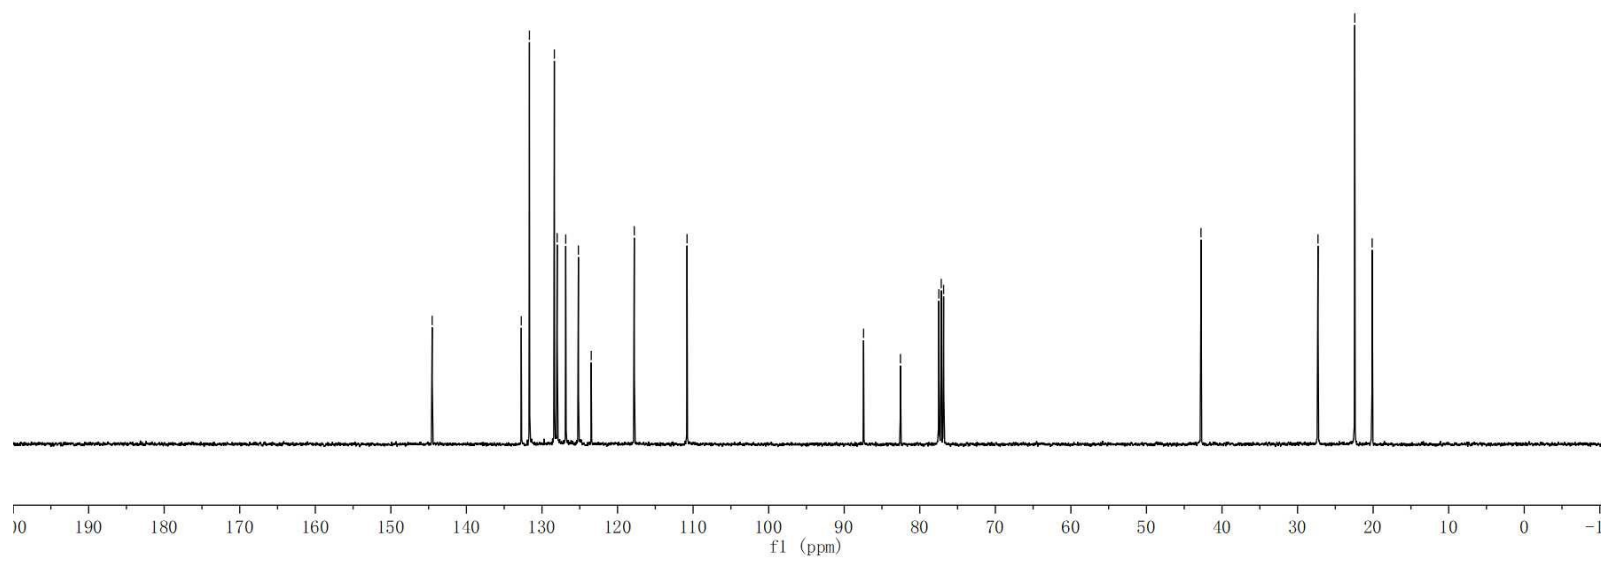



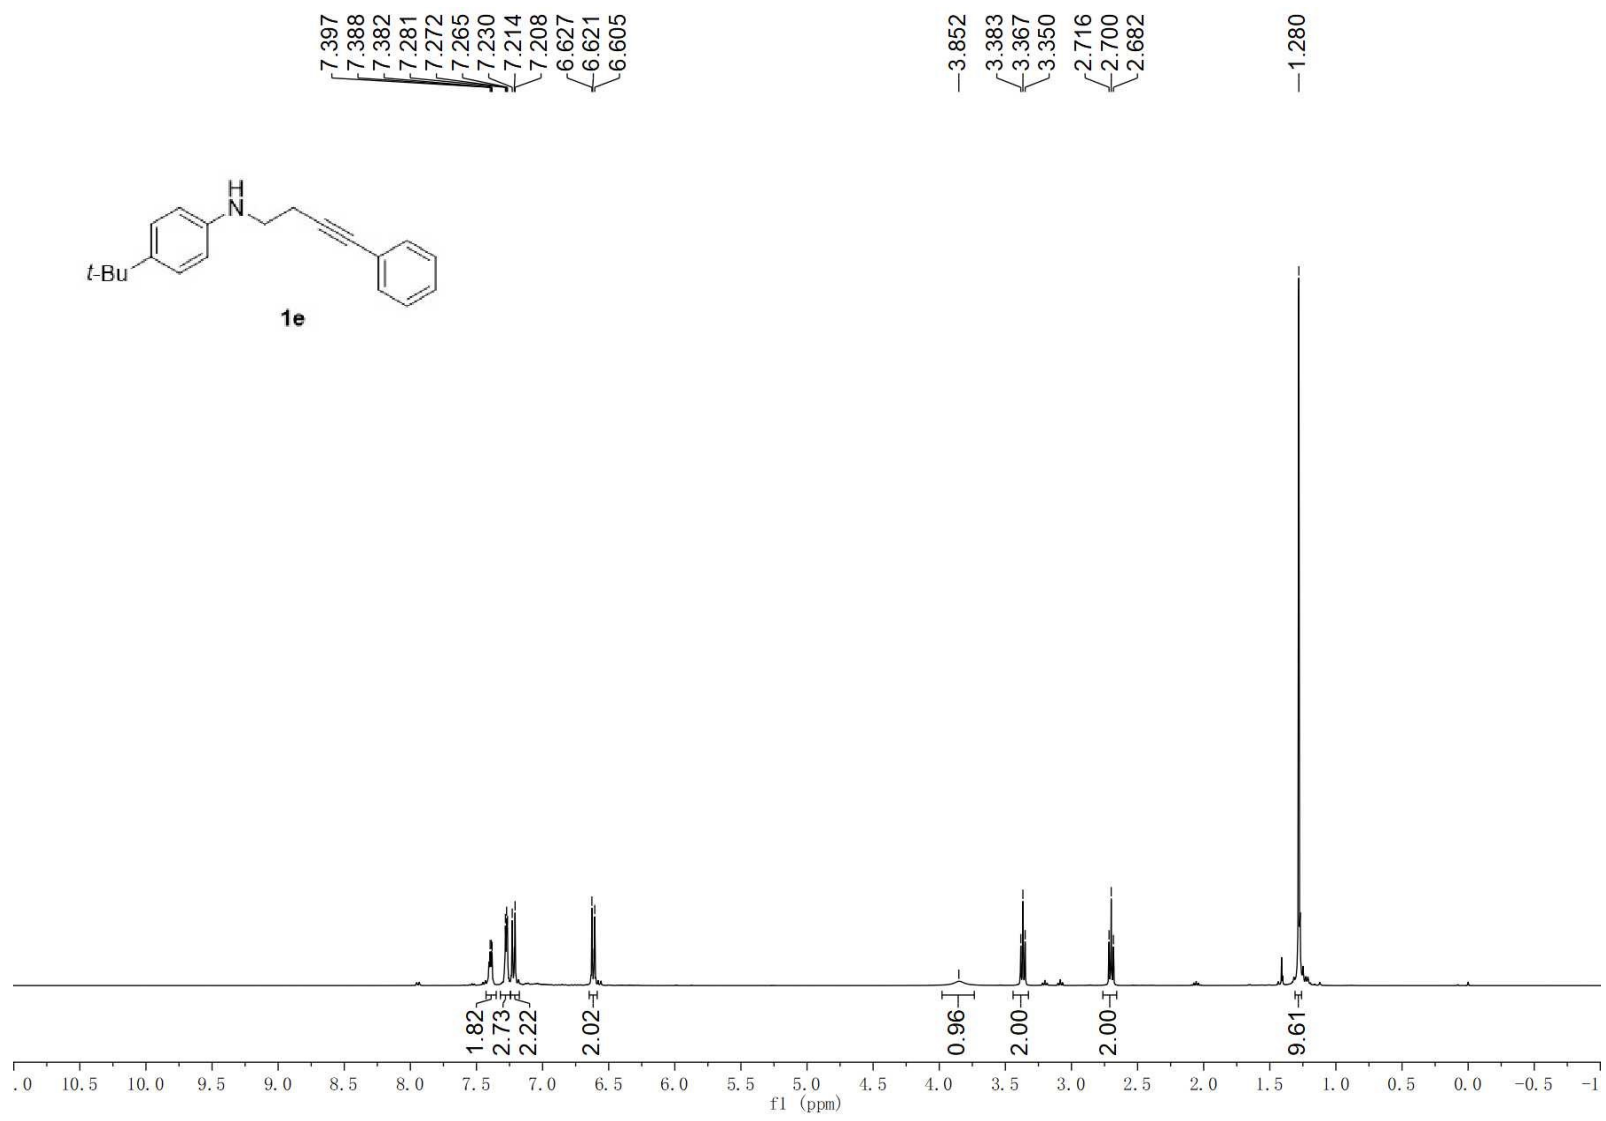

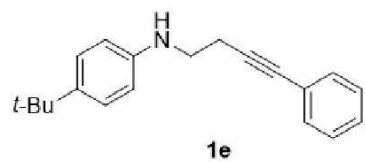

— 145.49  
 — 140.73  
 / 131.77  
 / 128.39  
 / 127.99  
 / 126.22  
 / 126.16  
 / 123.63  
 — 113.06

/ 87.51  
 / 82.32  
 / 77.49  
 / 77.16  
 / 76.85

— 43.14  
 ~ 34.00  
 ~ 31.68

— 20.41

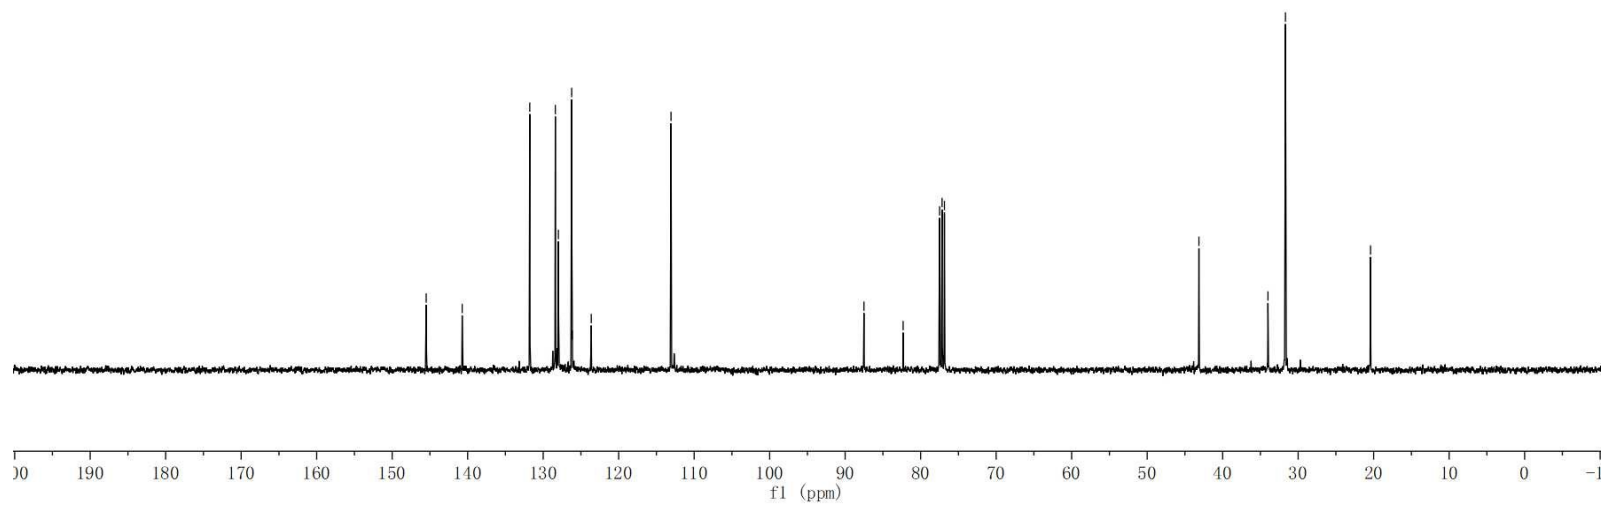

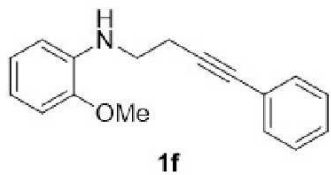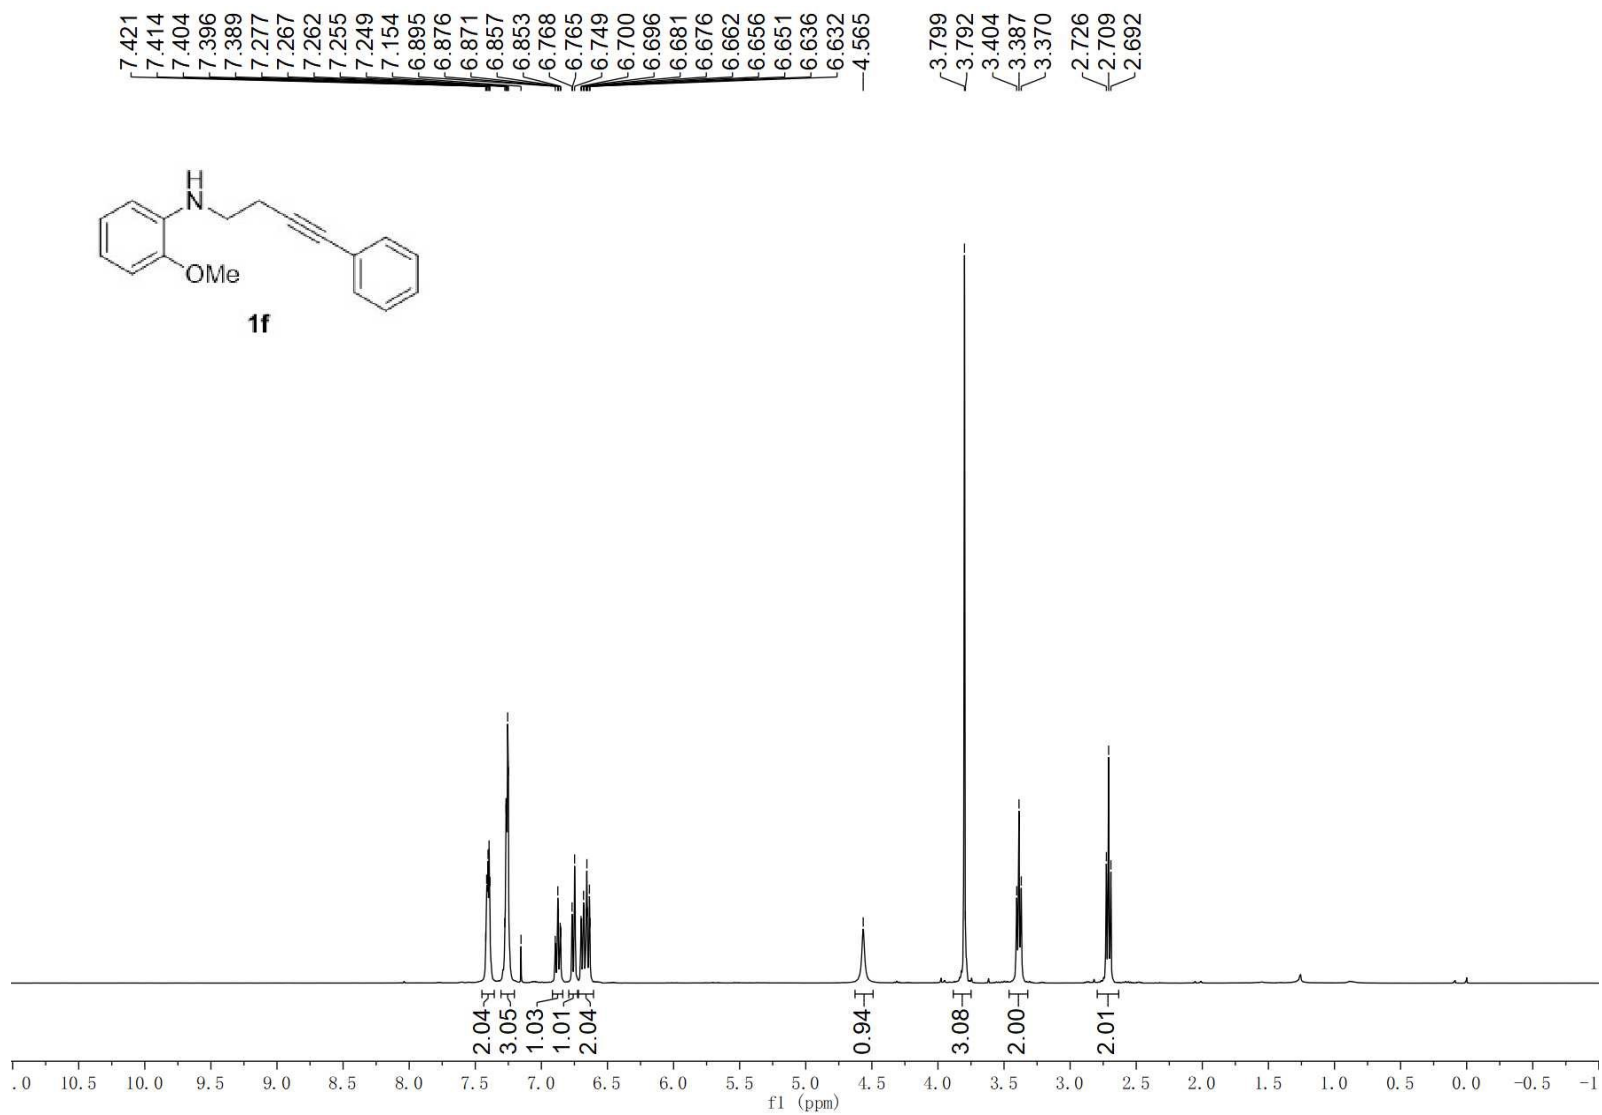

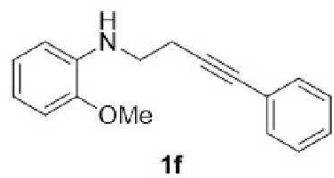

—147.08

—137.70

—131.66

—128.29

—127.85

—123.64

—121.35

—116.87

—110.09

—109.68

—87.50

—82.21

—77.48

—77.16

—76.84

—55.47

—42.55

—20.22

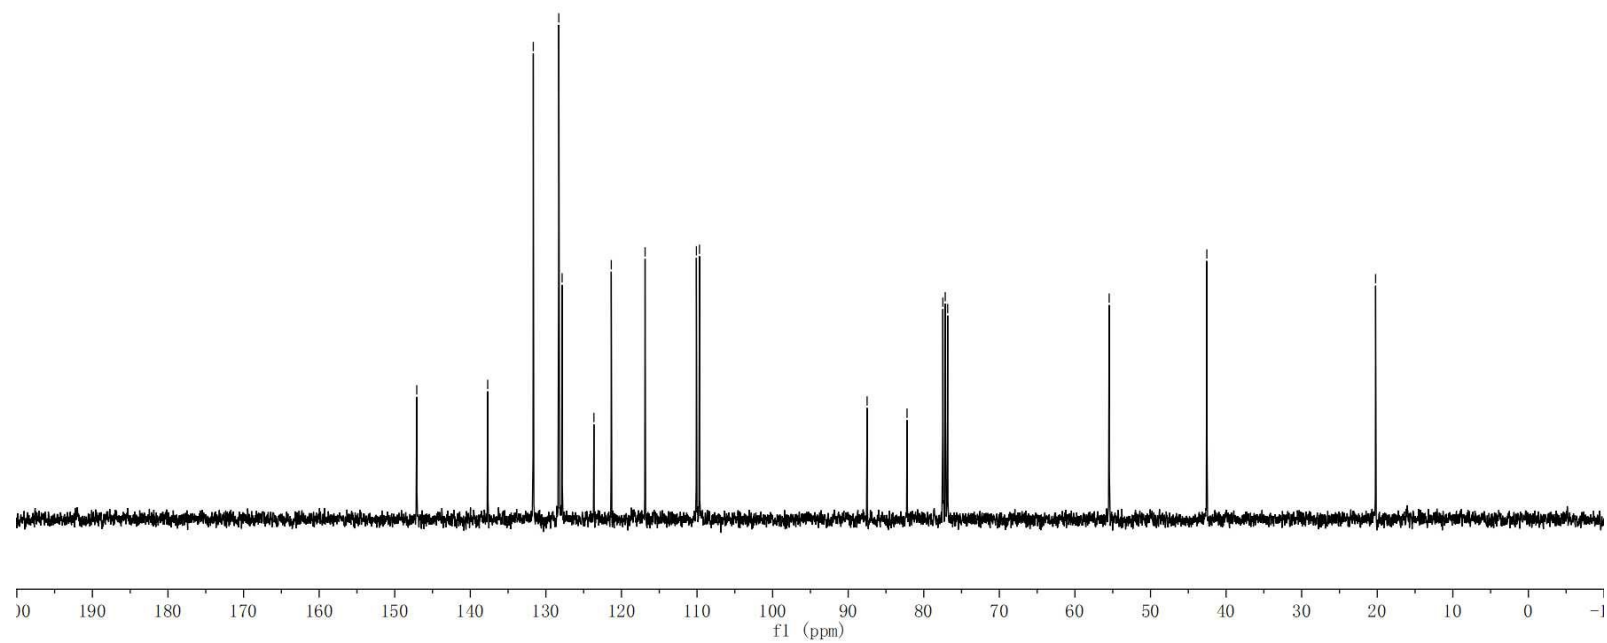

7.417  
7.406  
7.403  
7.399  
7.394  
7.389  
7.384  
7.309  
7.303  
7.298  
7.295  
7.292  
7.288  
7.286  
7.281  
7.241  
7.147  
7.140  
7.125  
7.119  
7.117  
6.556  
6.594  
6.587  
6.580  
6.565  
6.557

3.995  
3.370  
3.348  
3.326  
2.727  
2.706  
2.684

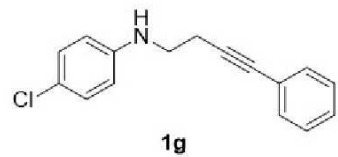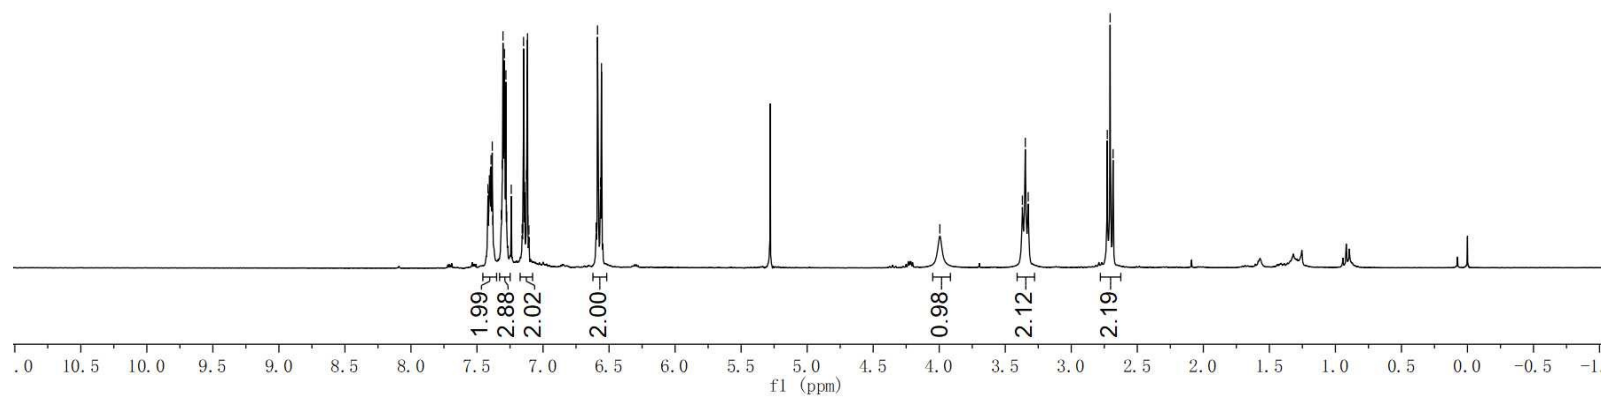

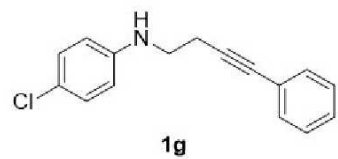

— 146.40  
131.76  
129.27  
128.43  
128.22  
128.12  
123.41  
122.45  
— 114.34

87.01  
82.52  
77.47  
77.16  
76.84

— 42.90

— 20.19

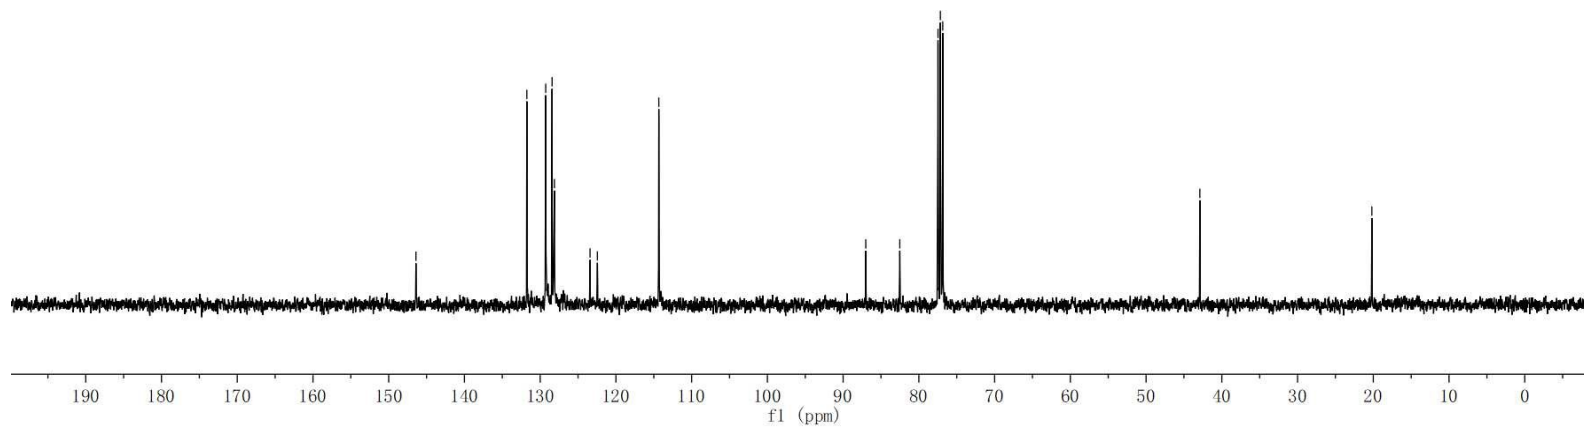

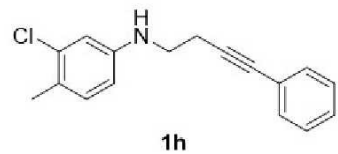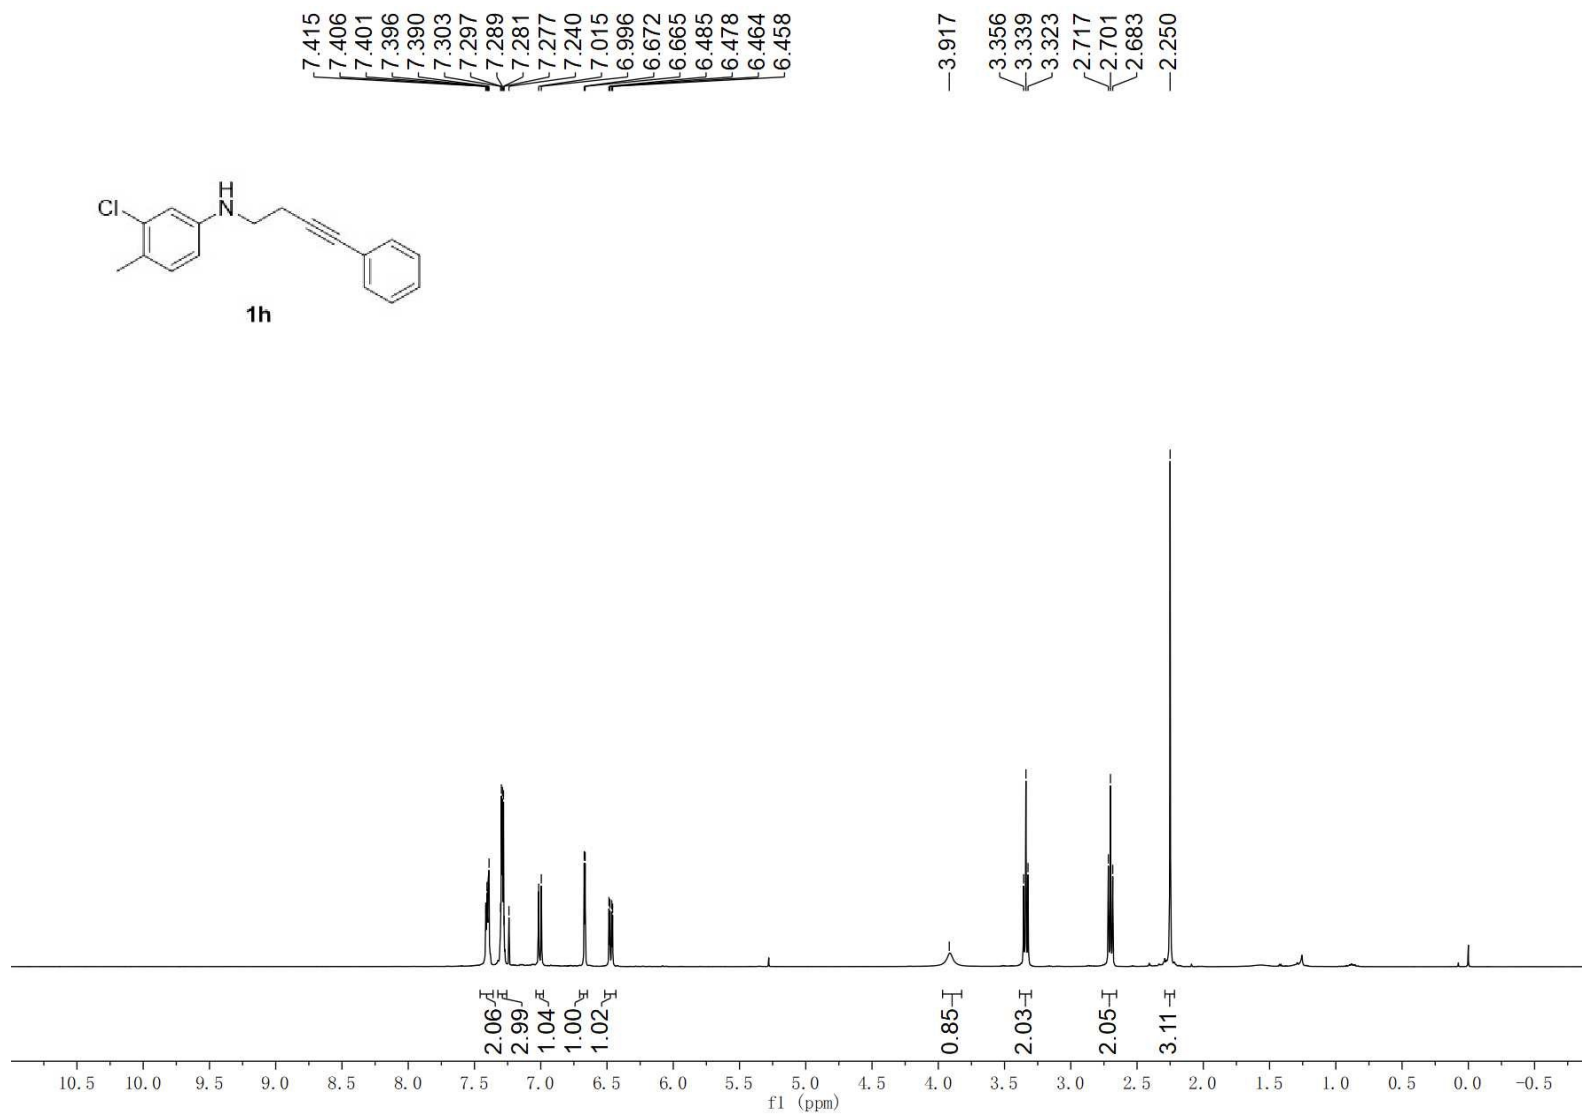

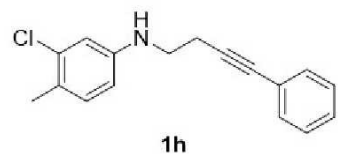

146.95  
135.02  
131.78  
131.47  
128.42  
128.09  
124.78  
123.45  
113.53  
112.13  
87.08  
82.49  
77.48  
77.16  
76.84  
42.95  
20.22  
19.03

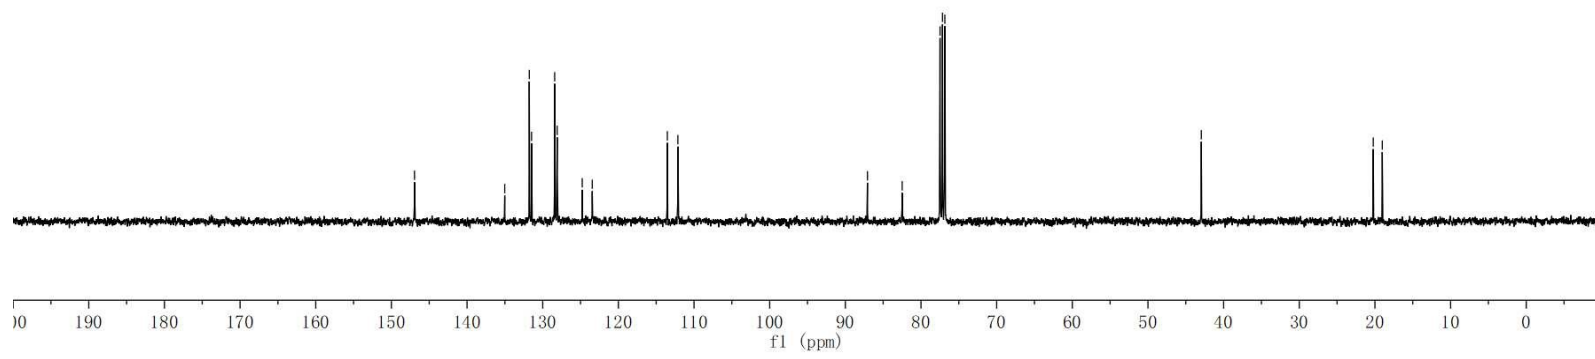



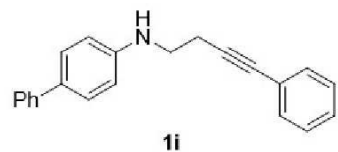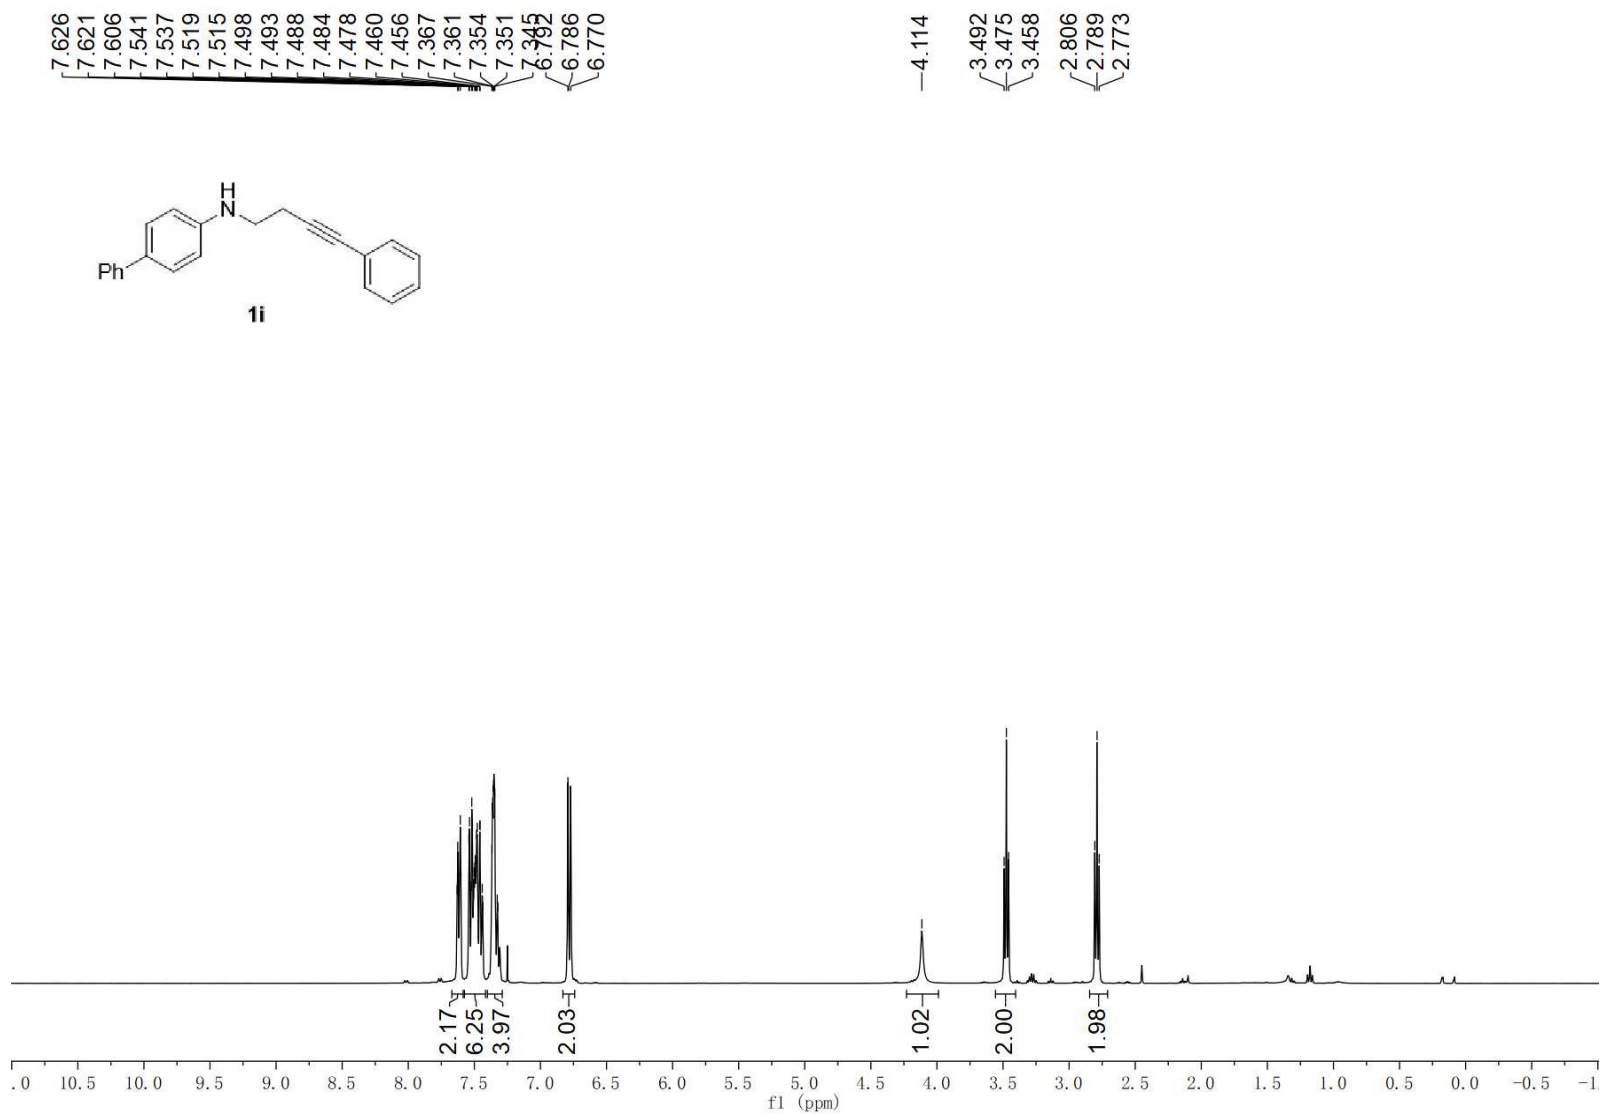

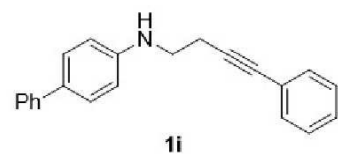

147.23  
141.28  
131.75  
130.73  
128.77  
128.40  
128.11  
128.03  
126.41  
126.22  
123.52  
-113.47

87.30  
82.43  
77.48  
77.16  
76.85

-42.81

-20.30

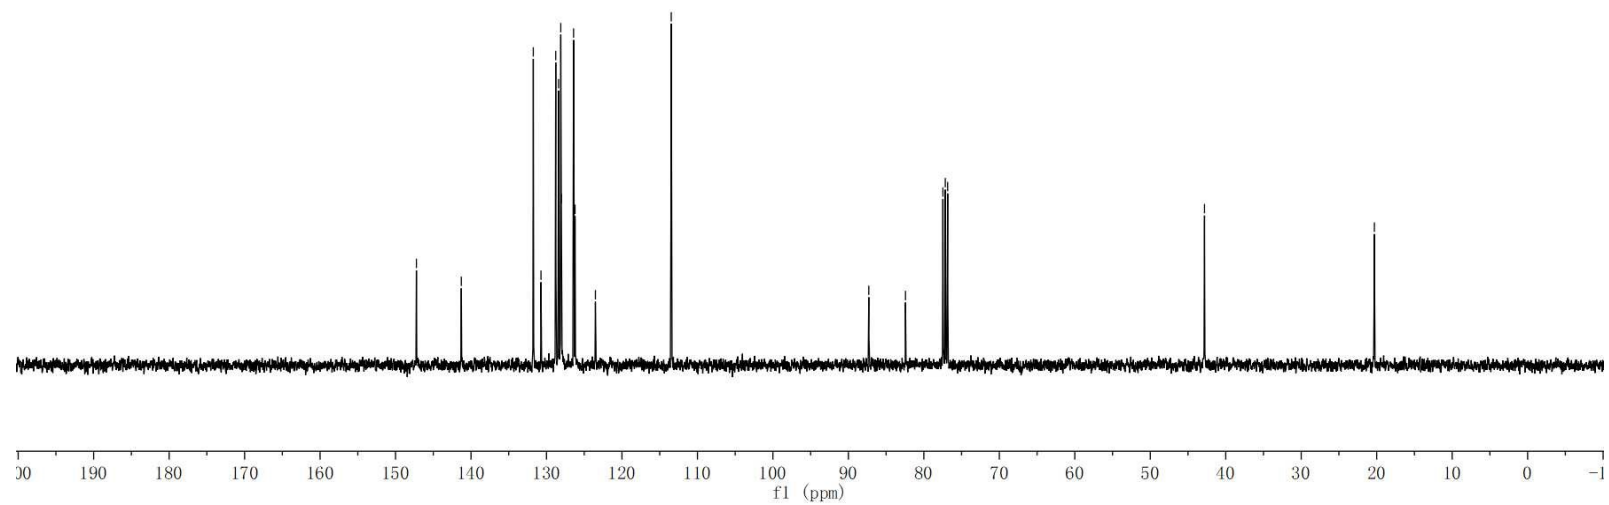

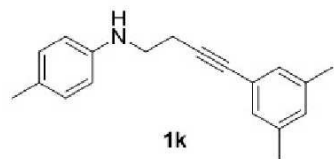

7.034  
7.013  
6.991  
6.920  
6.600  
6.579

3.853  
3.370  
3.352  
3.336  
2.704  
2.688  
2.671  
2.272  
2.244

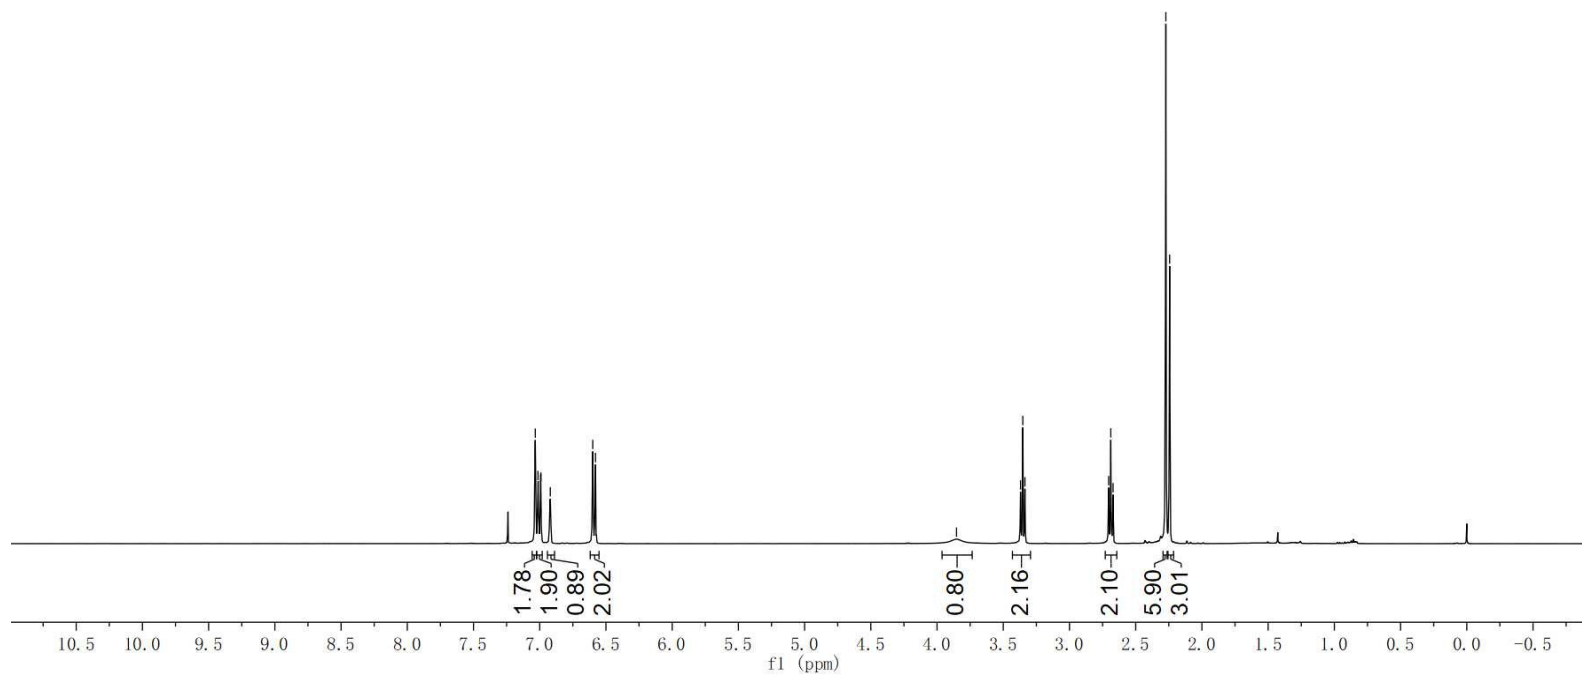



— 145.60  
— 137.95  
— 129.95  
— 129.92  
— 129.48  
— 127.19  
— 123.22  
— 113.59

— 86.62  
— 82.61  
— 77.48  
— 77.36  
— 77.16  
— 76.84

— 43.35

— 21.22  
— 20.52  
— 20.33

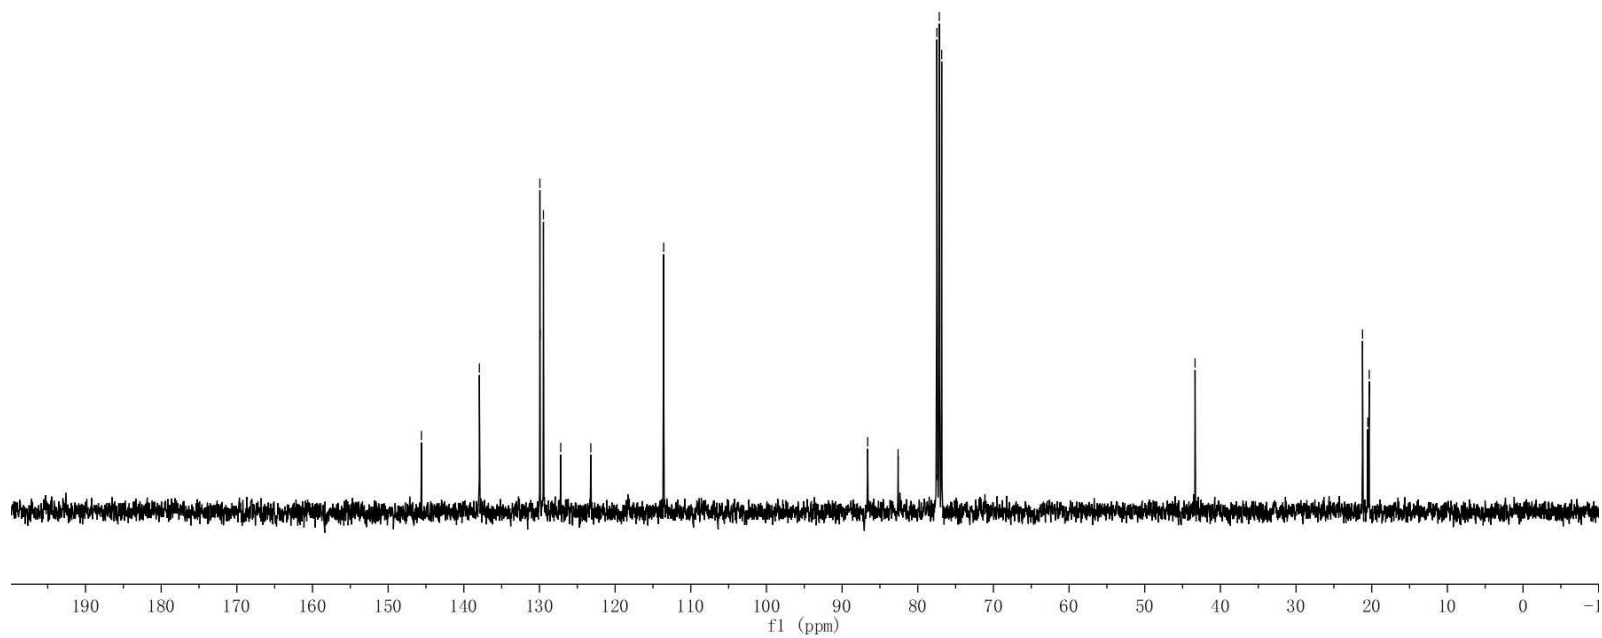

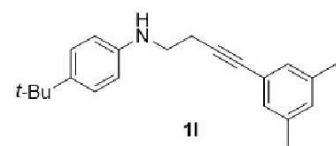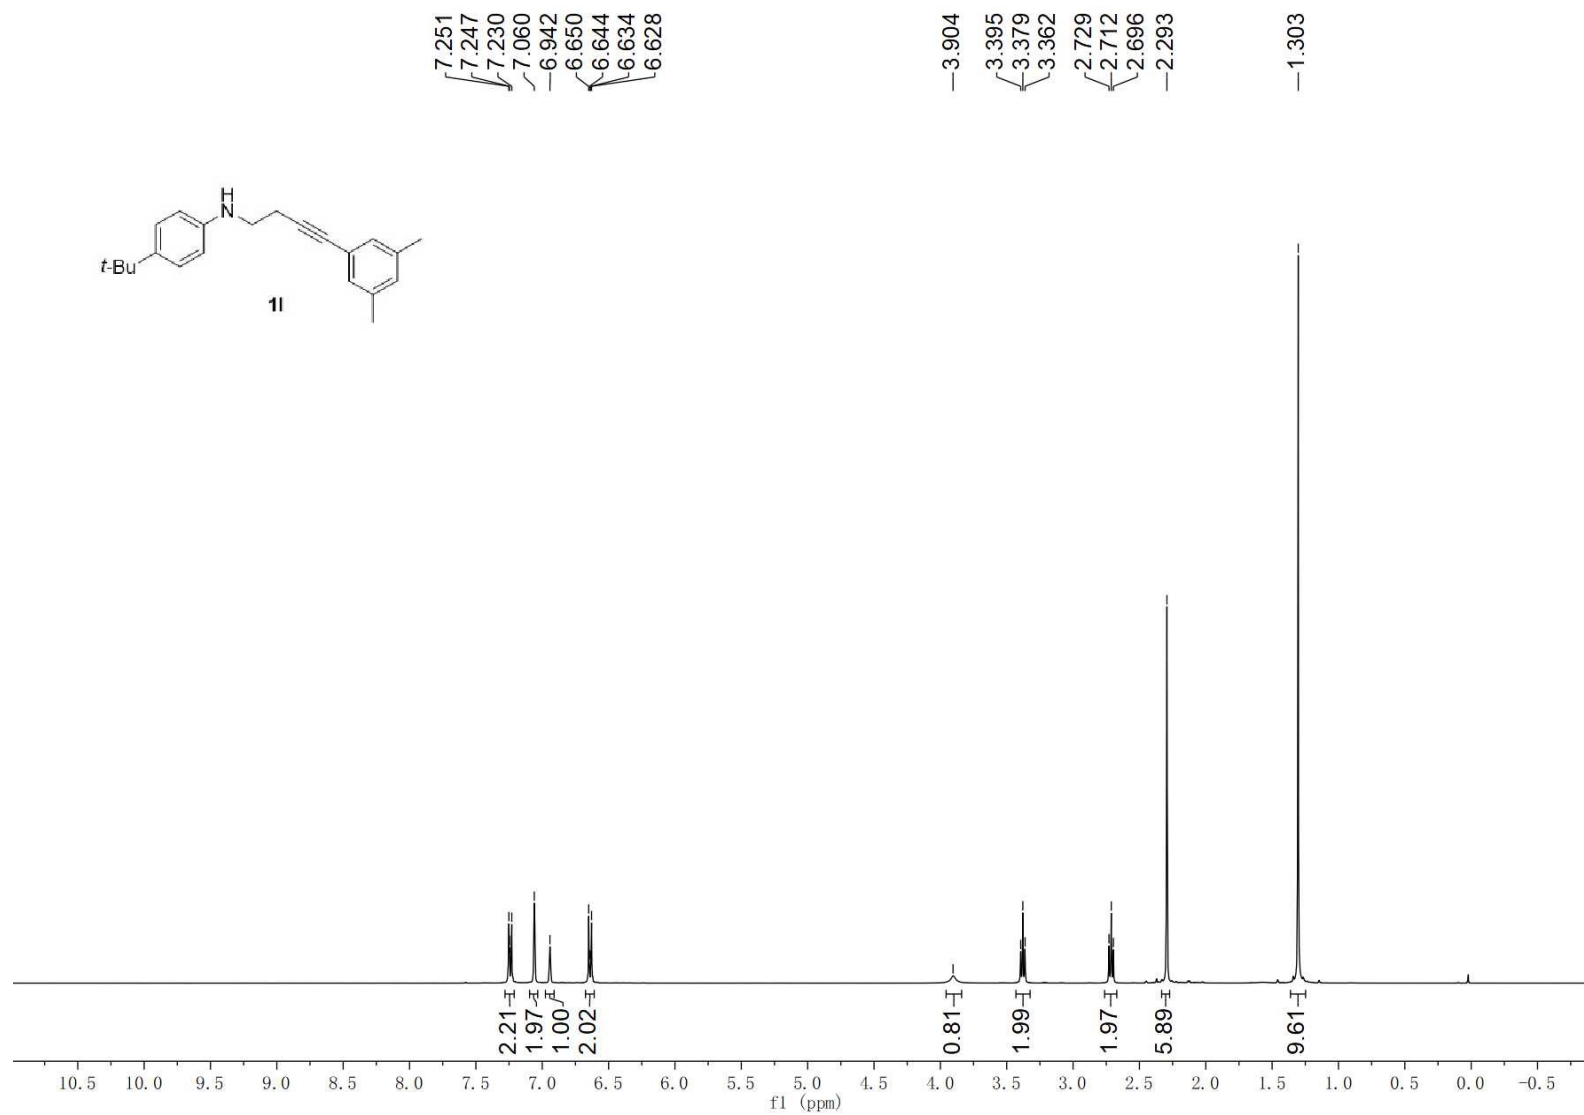

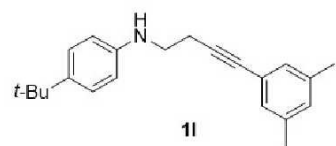

~145.53  
~140.70  
~137.94  
~129.92  
~129.48  
~126.21  
~123.21  
-113.07

~86.68  
~82.58  
~77.47  
~77.16  
~76.84

-43.20

~34.00  
~31.69

~21.22  
~20.40

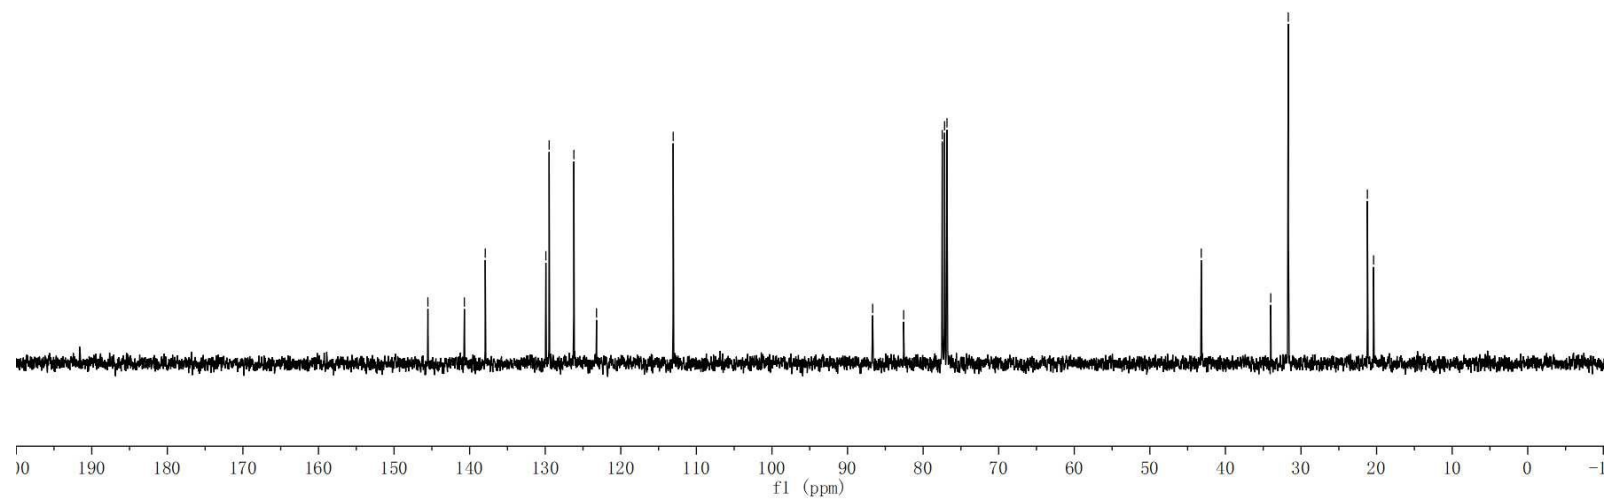

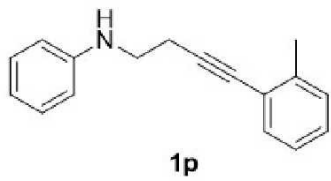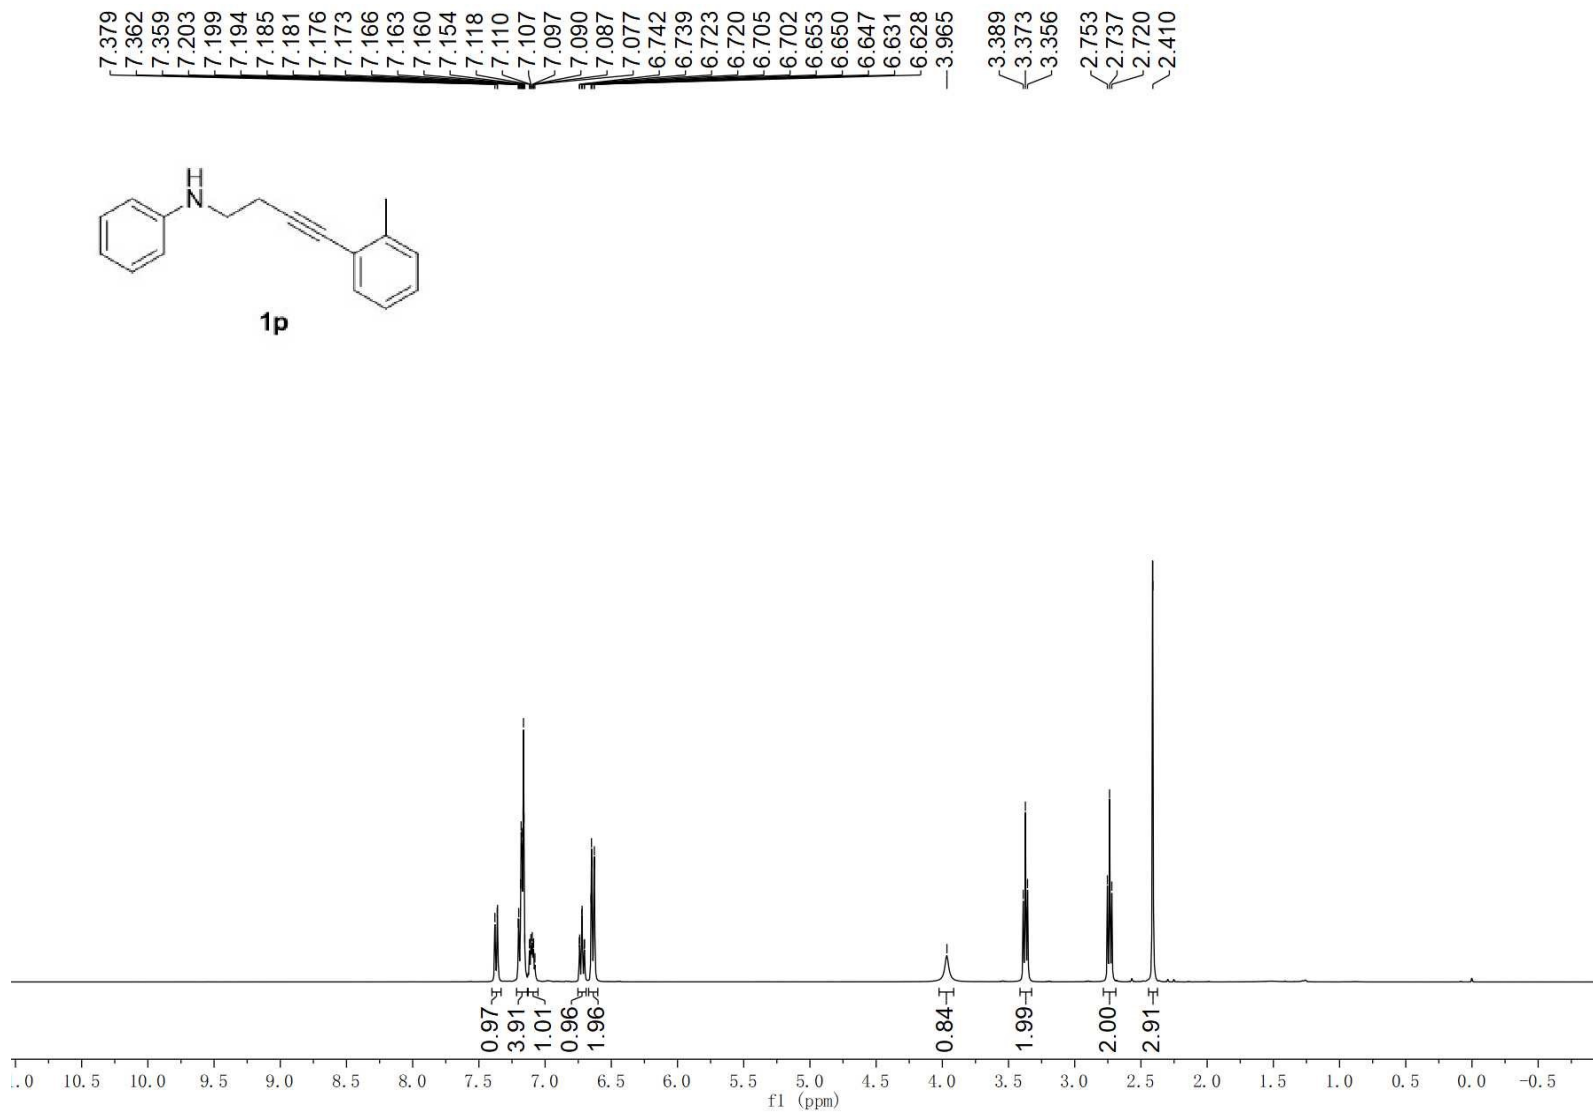



—147.84  
—140.07  
/ 132.02  
/ 129.48  
/ 129.44  
/ 127.99  
/ 125.62  
/ 123.33  
/ 117.89  
/ 113.26  
  
—91.24  
/ 81.27  
/ 77.48  
/ 77.16  
/ 76.84  
  
—42.98  
  
/ 20.87  
/ 20.41

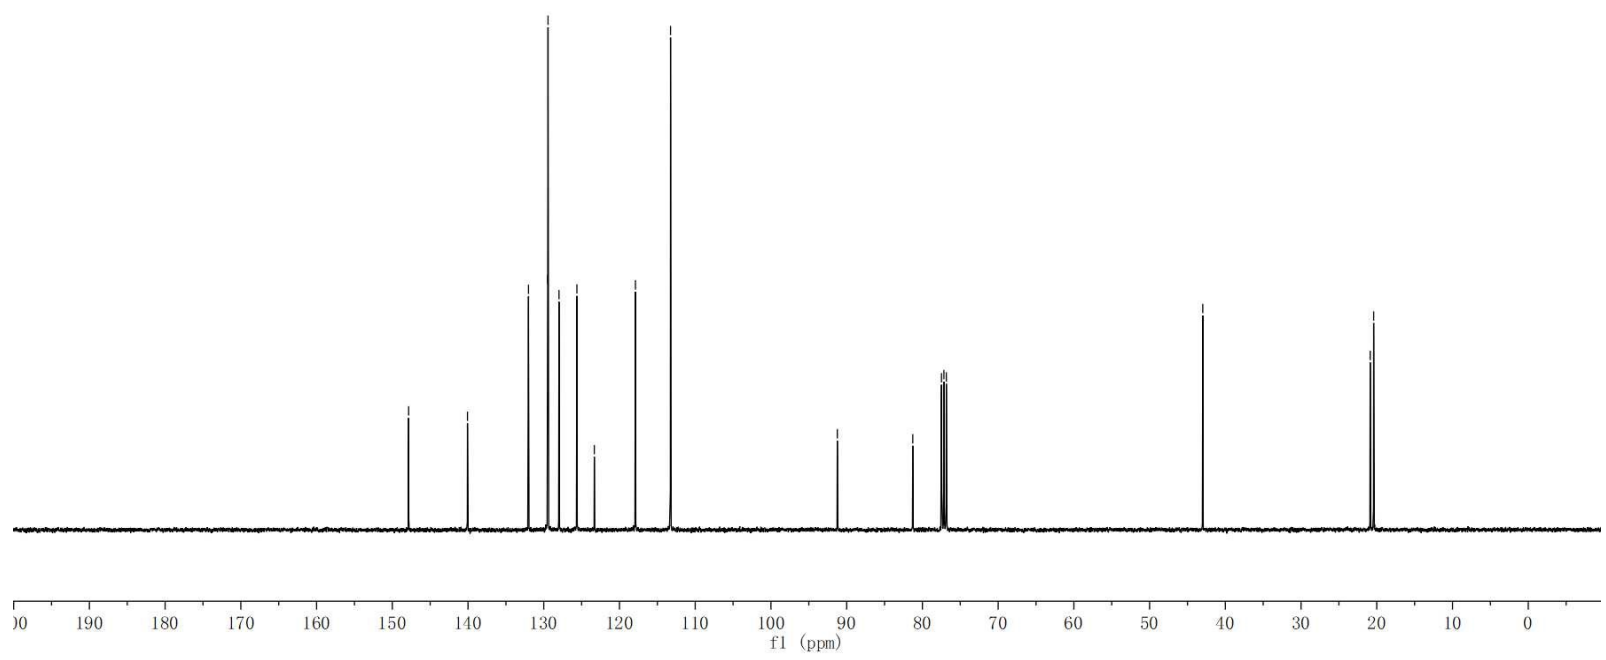



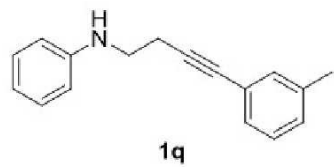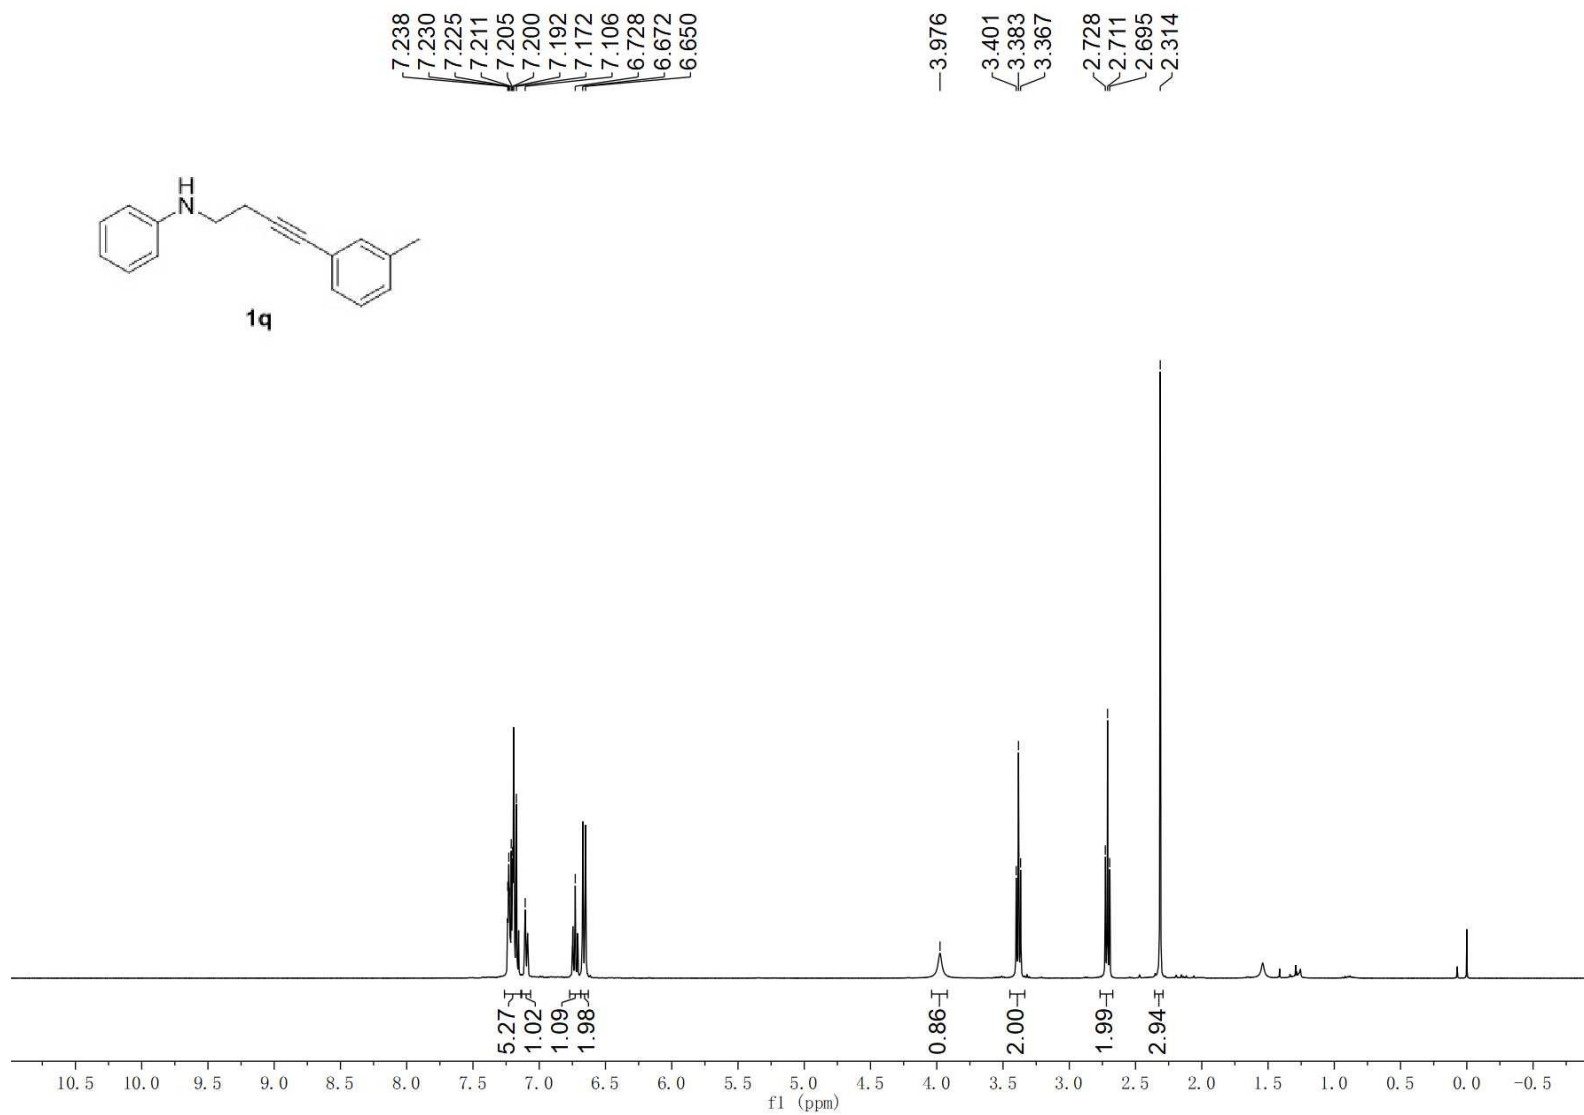

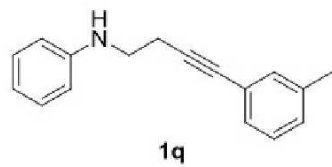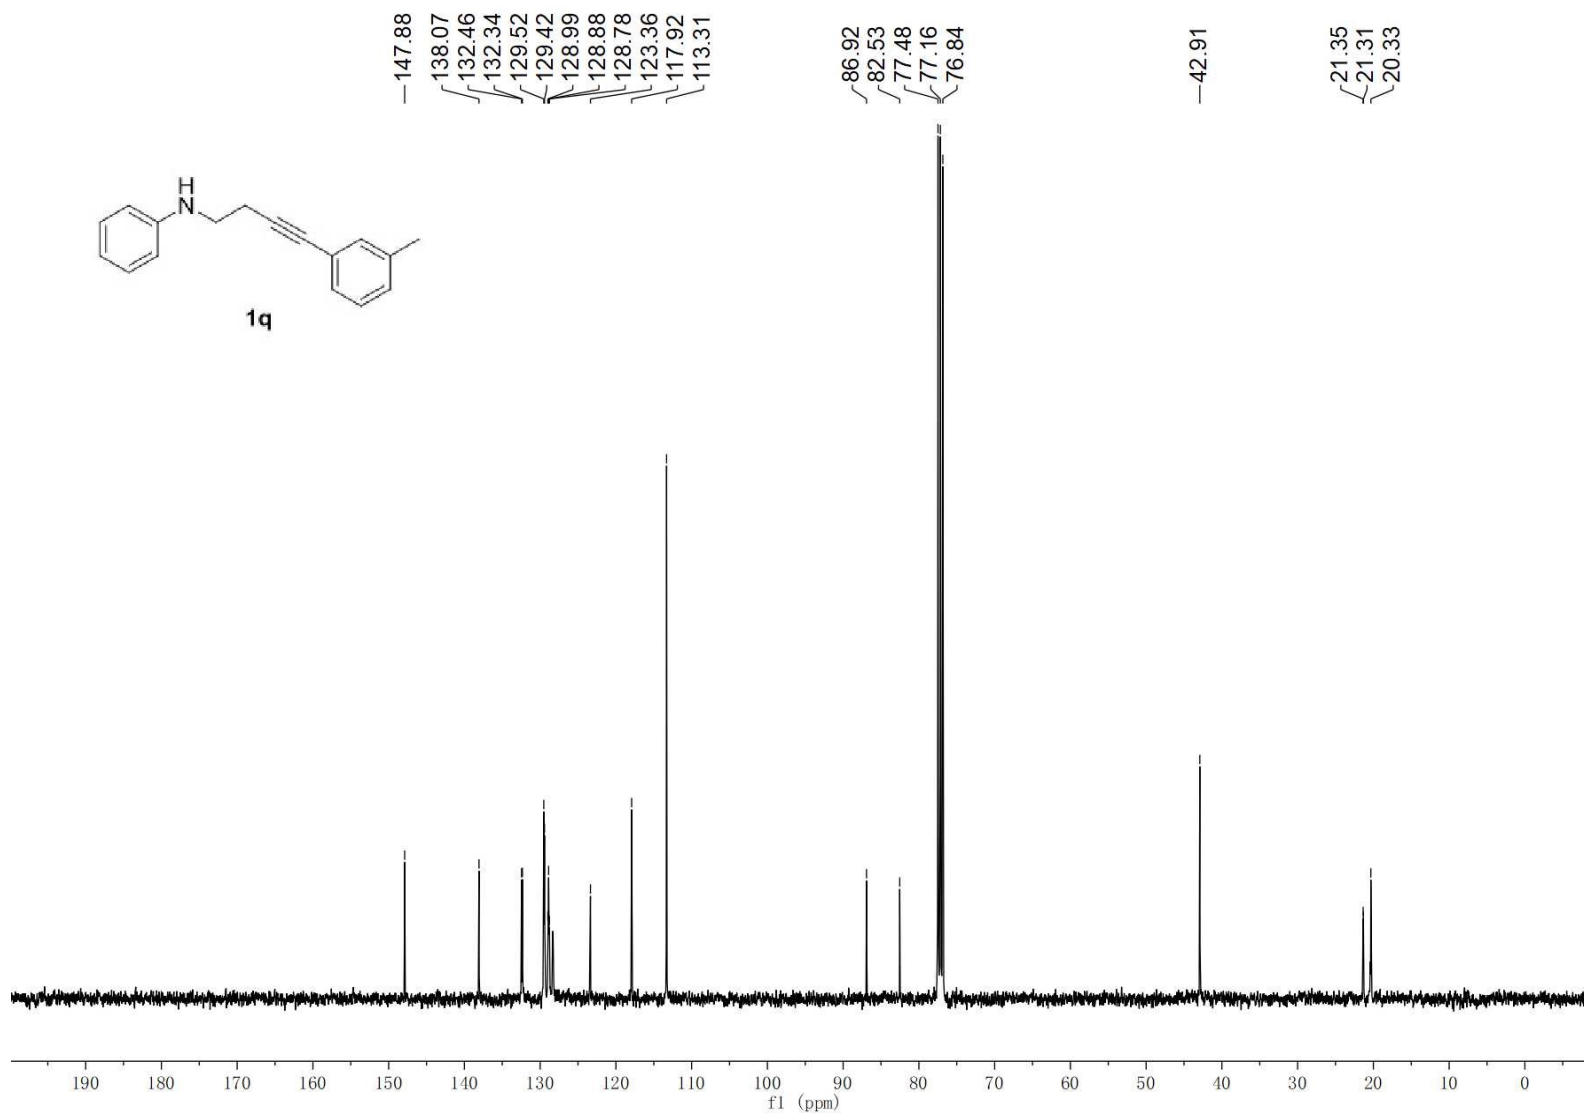

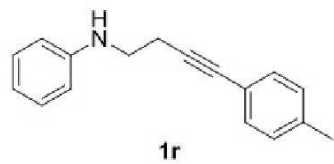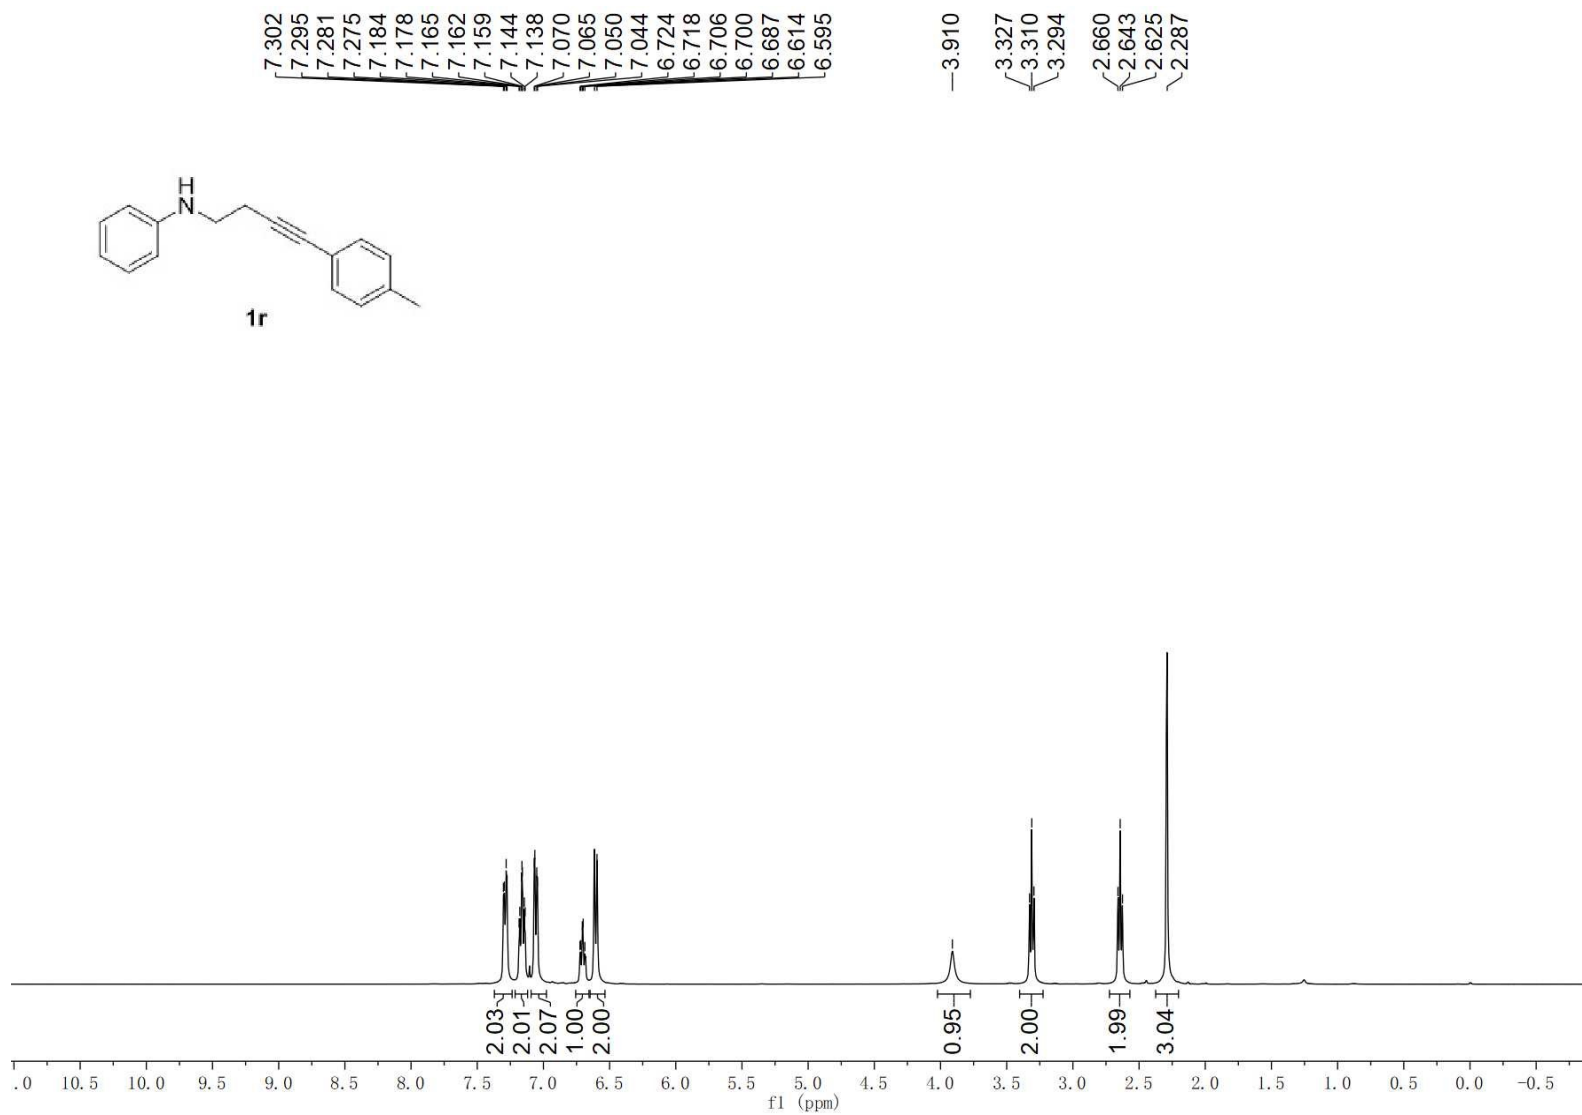

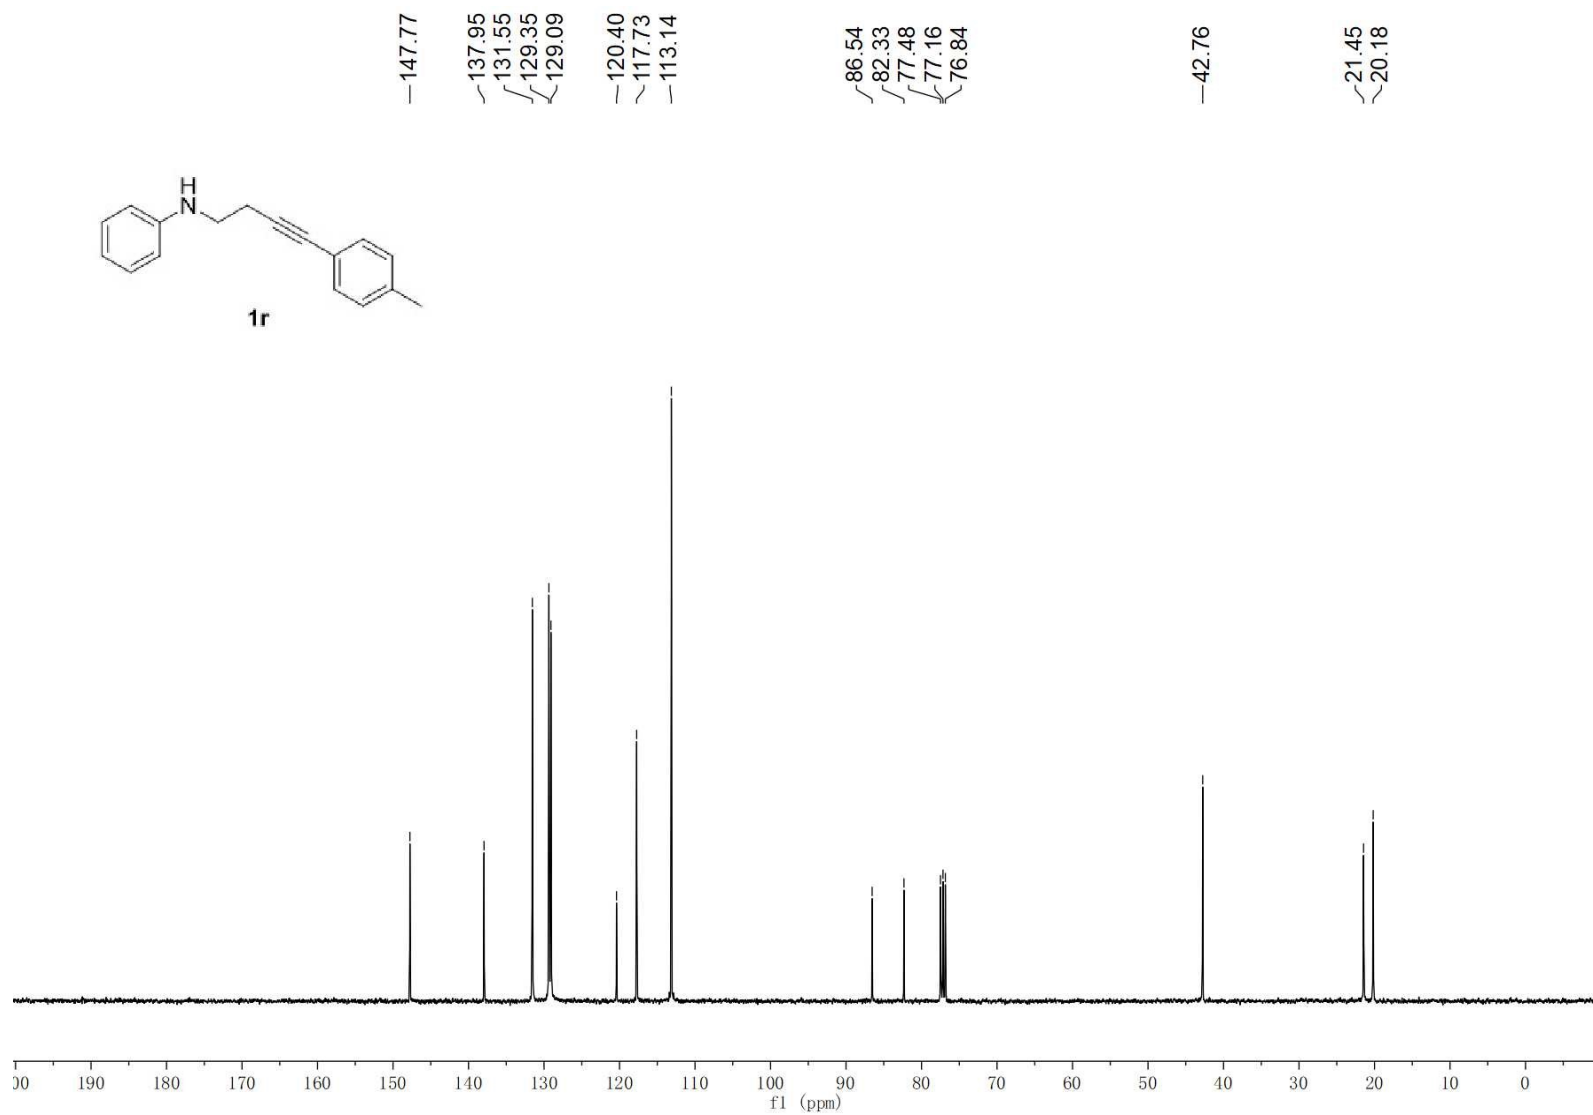

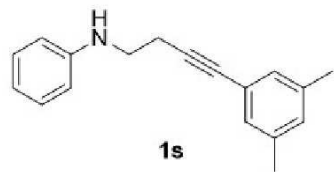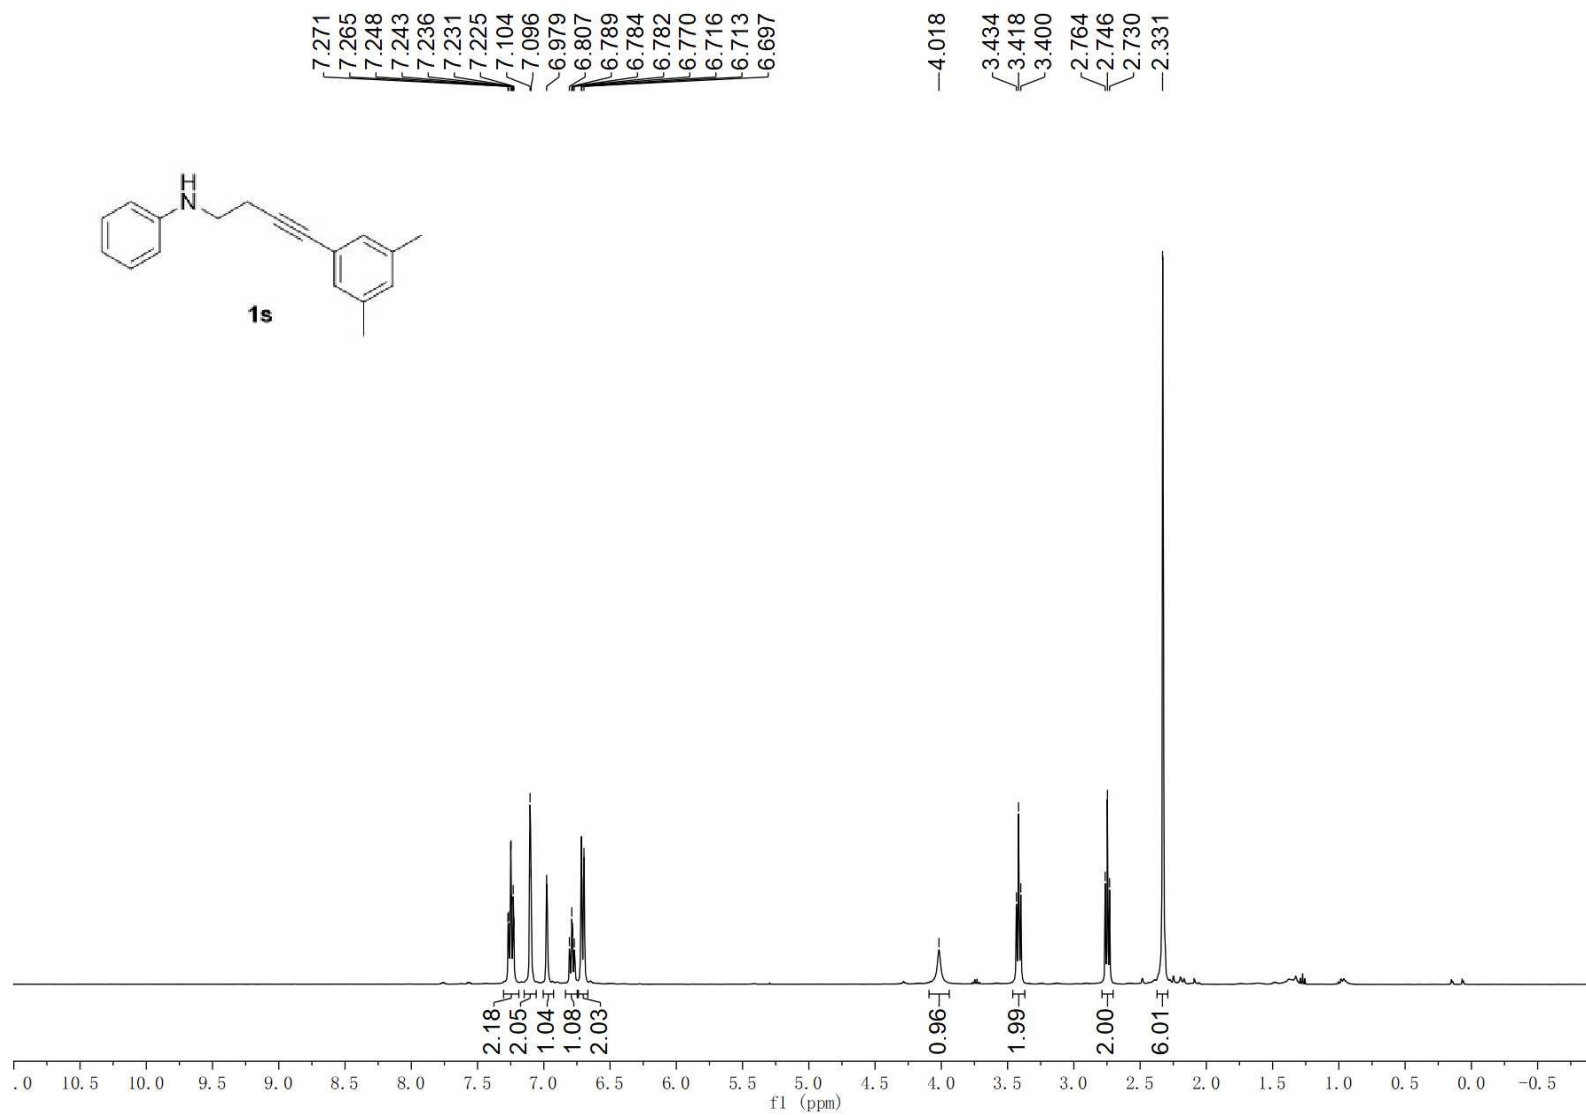



-147.87

-137.94

129.94

129.45

123.12

-117.87

113.28

86.50

82.61

77.48

77.16

76.84

-42.89

21.22

20.28

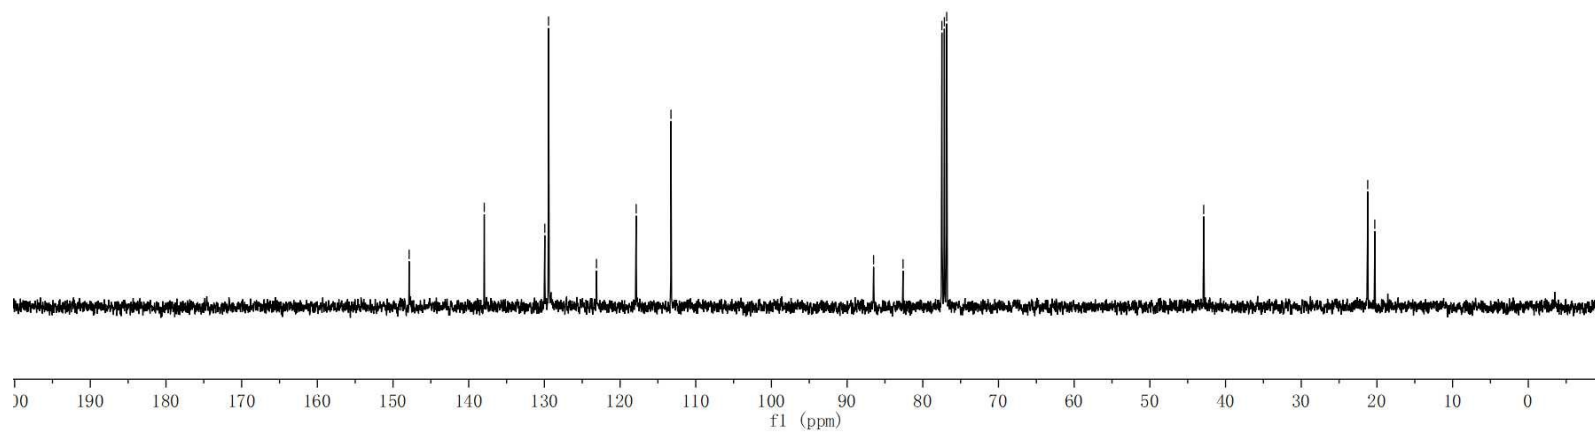

7.402  
7.396  
7.383  
7.377  
7.364  
7.359  
7.258  
7.252  
7.245  
7.238  
7.231  
7.226  
7.218  
7.213  
7.207  
7.203  
7.197  
7.190  
7.188  
7.174  
7.168  
7.066  
7.049  
7.041  
7.030  
7.021  
6.747  
6.729  
6.710  
6.674  
6.668  
6.652  
6.646  
4.013  
3.403  
3.395  
3.387  
3.370  
2.752  
2.743  
2.736  
2.718

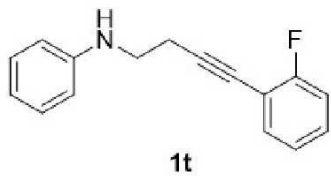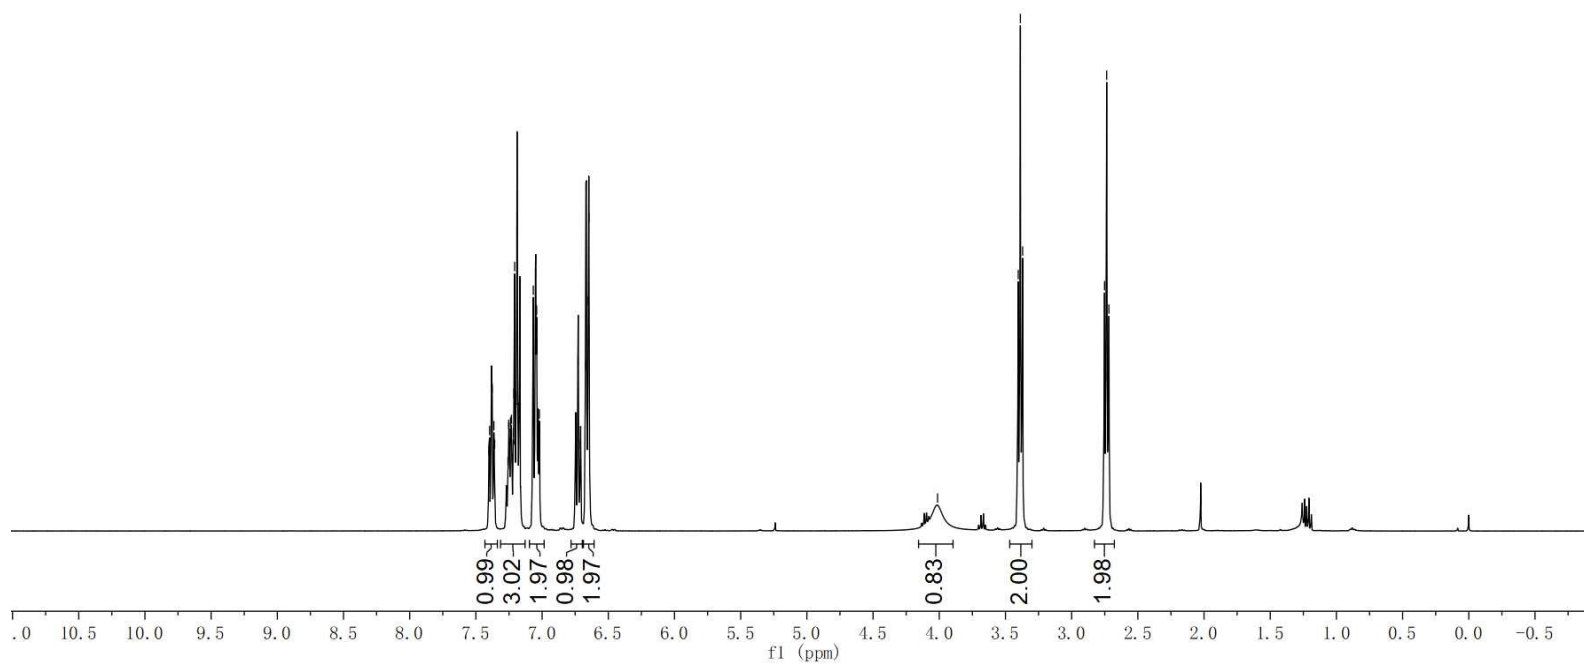



164.23  
161.75

147.75

133.57

129.70

129.61

129.42

124.01

123.97

117.90

115.60

115.40

113.31

112.08

111.92

92.89

92.85

77.47

77.16

76.84

75.75

42.61

20.39

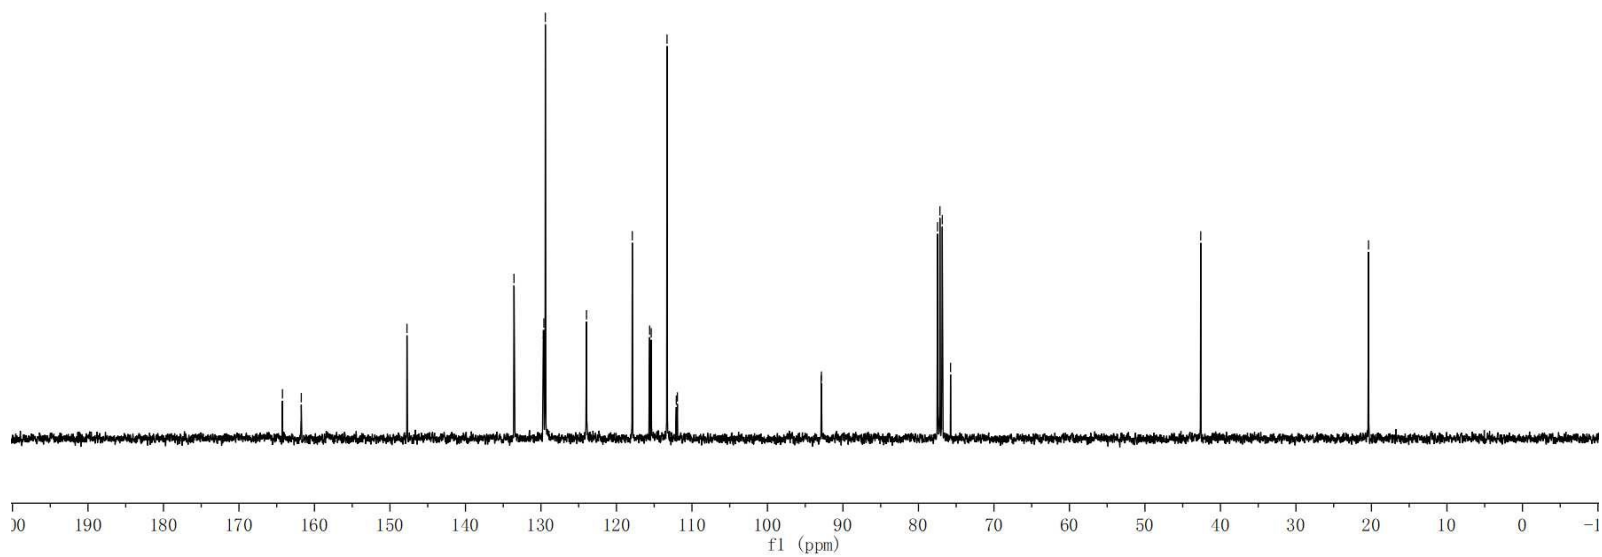



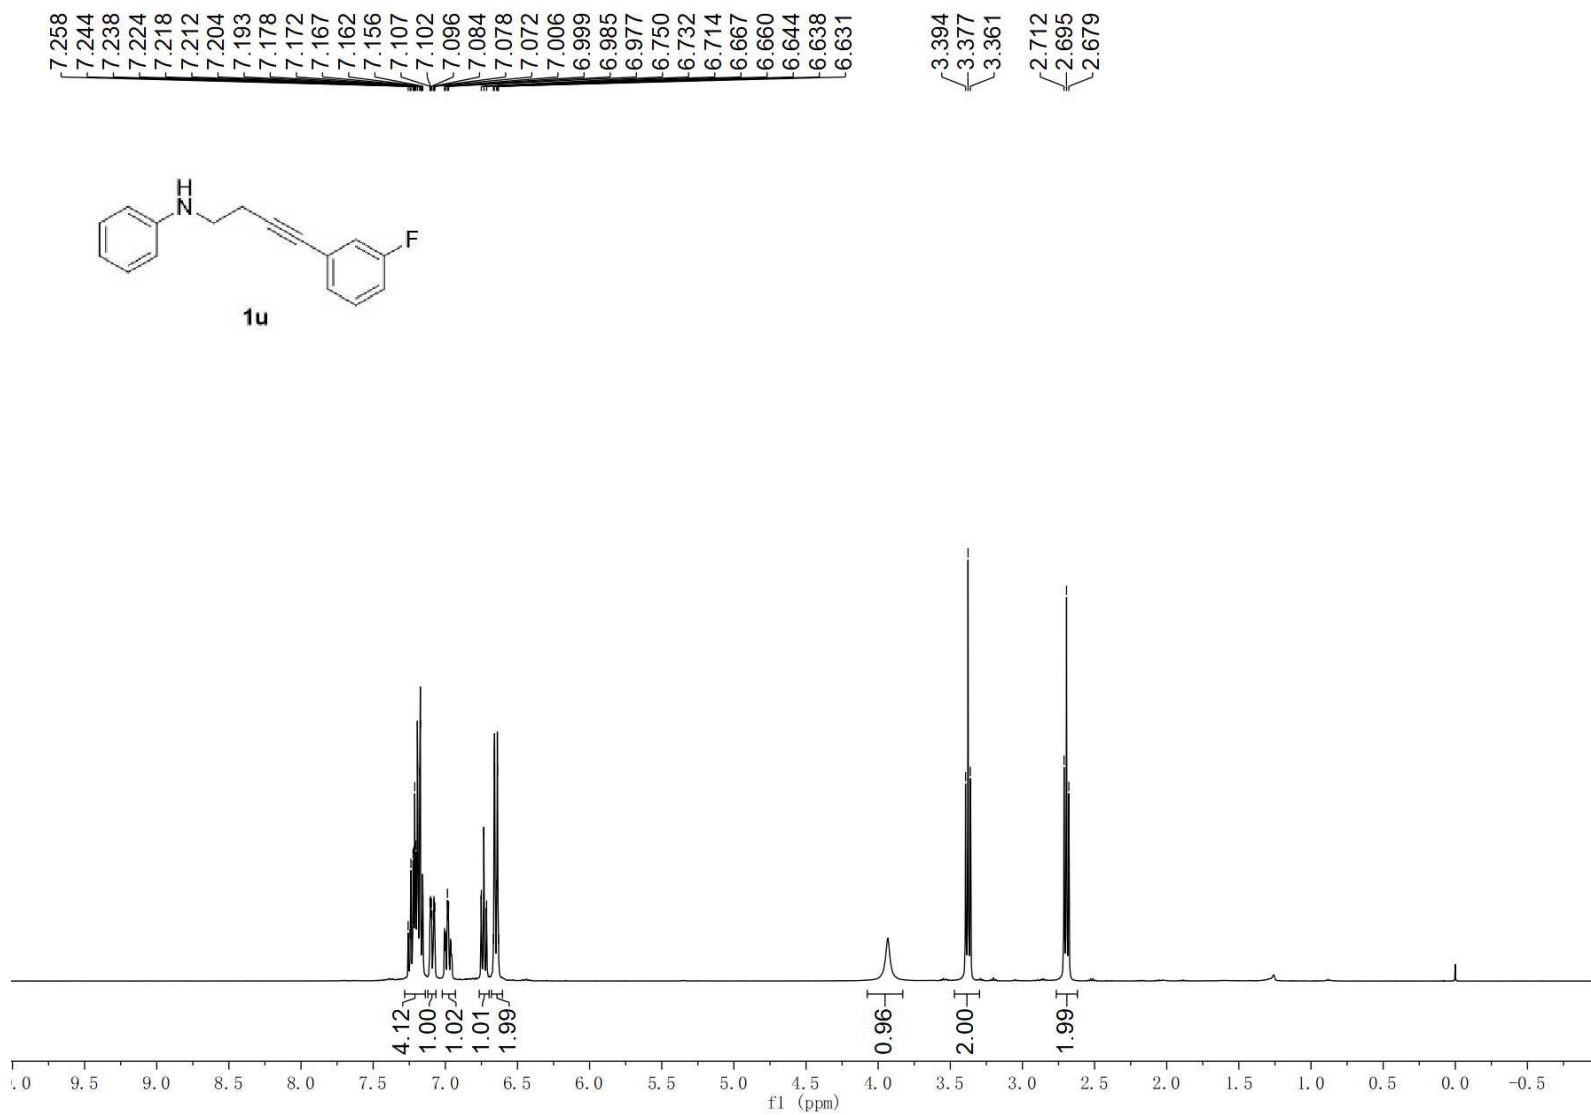

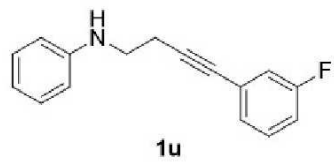

163.68  
161.23

147.69

129.91

129.50

129.44

127.64

125.45

125.35

118.71

118.49

118.41

117.95

115.46

115.24

113.21

88.53

81.21

81.18

77.47

77.16

76.85

42.69

20.24

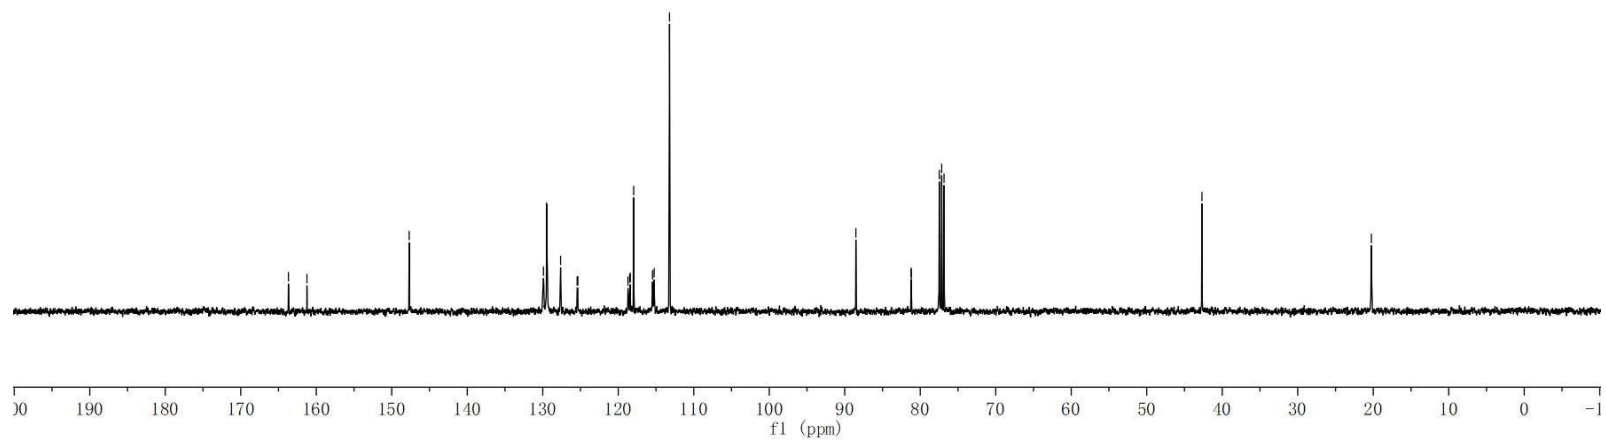

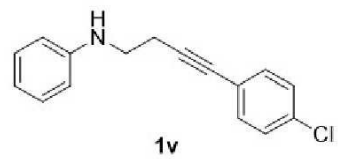

7.311  
7.306  
7.295  
7.289  
7.245  
7.229  
7.224  
7.199  
7.196  
7.181  
7.178  
7.160  
6.744  
6.741  
6.738  
6.725  
6.722  
6.720  
6.707  
6.704  
6.701  
6.639  
6.619

3.910  
3.369  
3.352  
3.335  
2.687  
2.670  
2.653

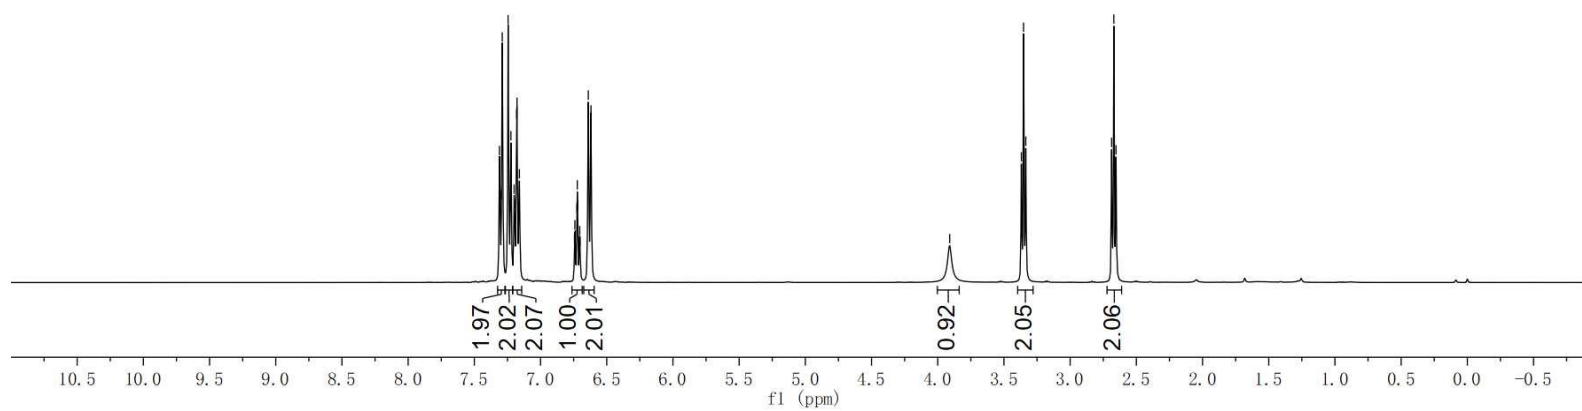

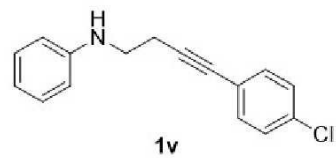

—147.71

—133.93

—132.95

—129.43

—128.66

—122.04

—117.92

—113.19

—88.48

—81.26

—77.48

—77.16

—76.84

—42.73

—20.30

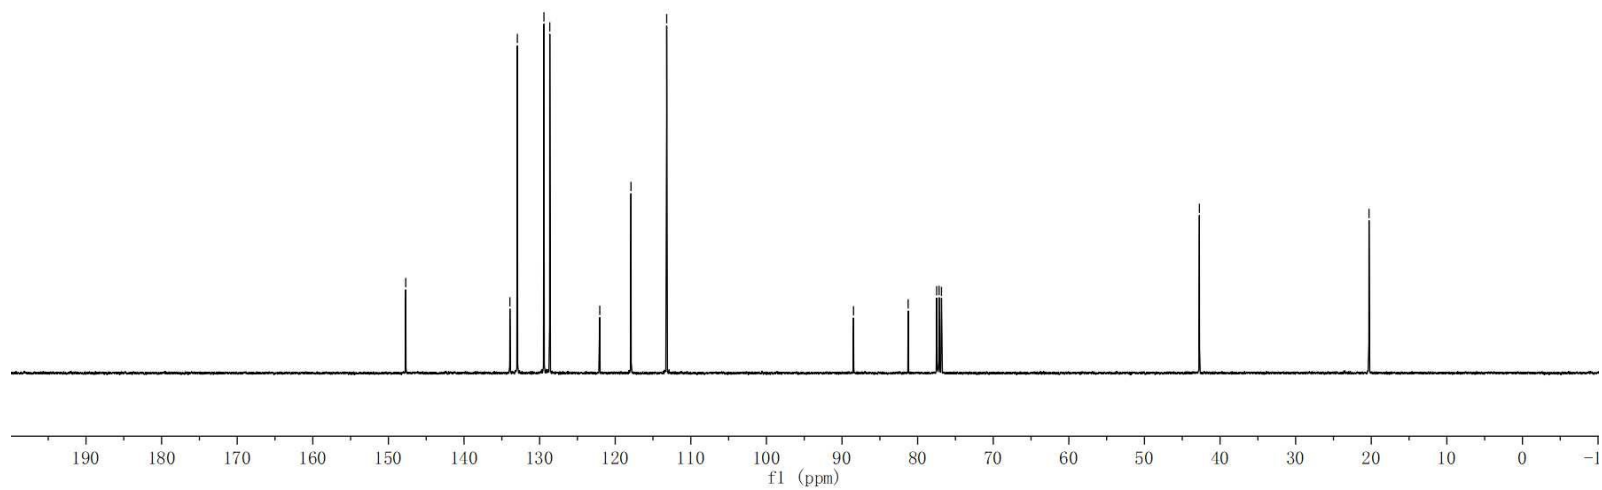



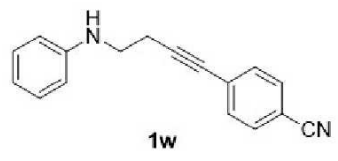

147.51  
132.19  
131.97  
129.39  
128.45  
118.56  
117.90  
113.08  
111.18  
92.51  
80.89  
77.48  
77.16  
76.84  
42.47  
20.34

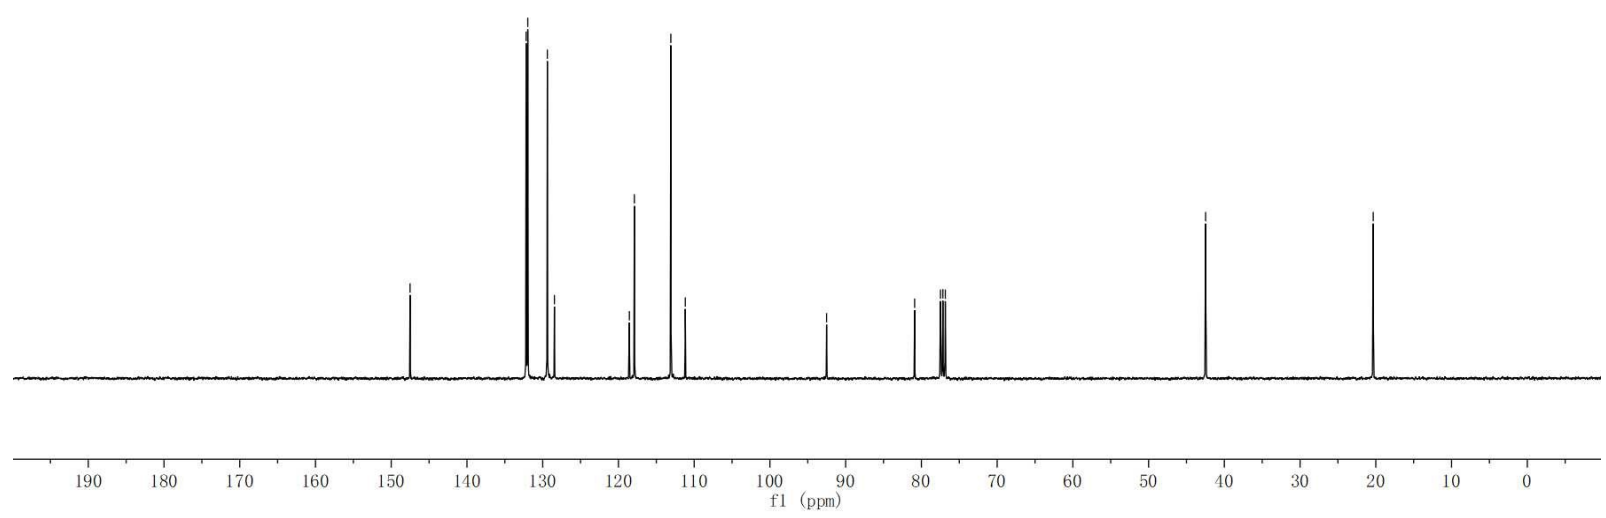

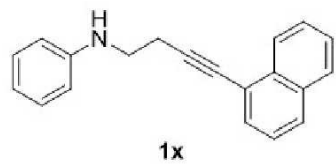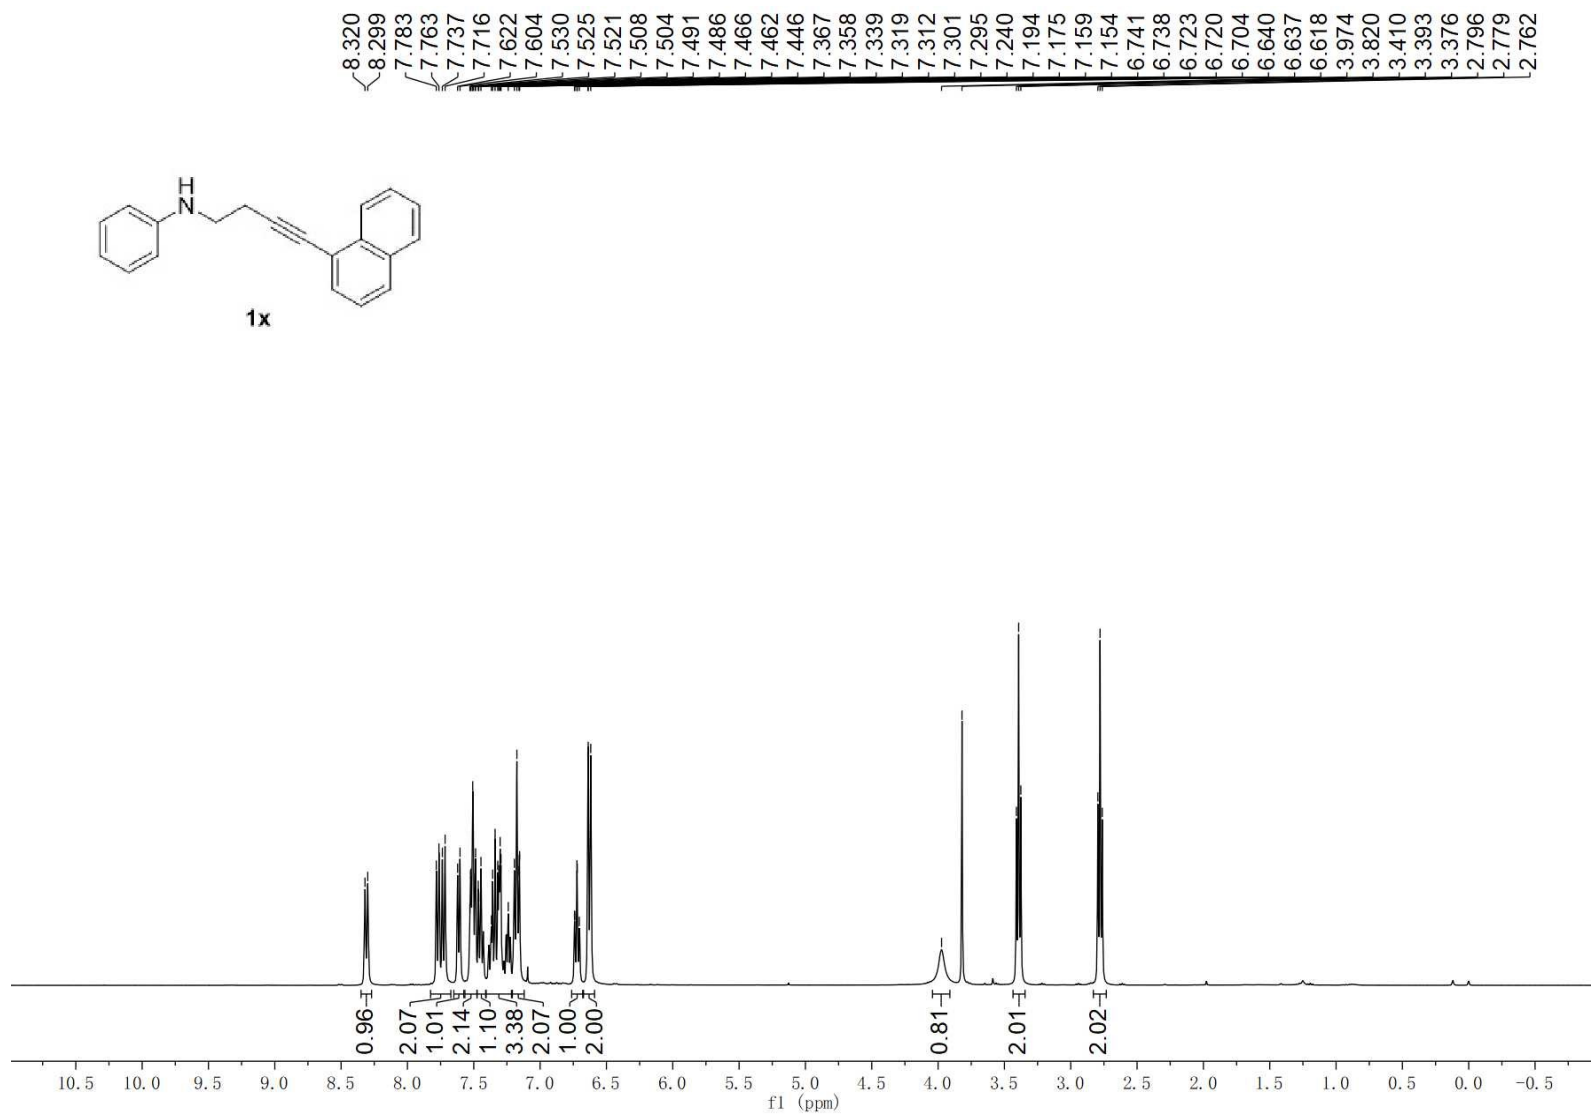

147.72  
133.46  
133.21  
132.34  
131.76  
131.62  
130.28  
129.38  
129.01  
128.87  
128.52  
128.35  
128.31  
128.25  
128.16  
128.13  
126.71  
126.36  
126.17  
125.25  
122.78  
122.54  
121.17  
117.79  
117.46  
113.18  
95.73  
92.41  
86.10  
80.34  
77.48  
77.16  
76.84

—42.86

~22.70  
~20.49

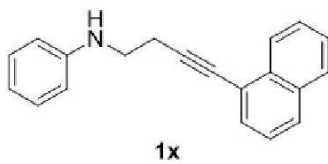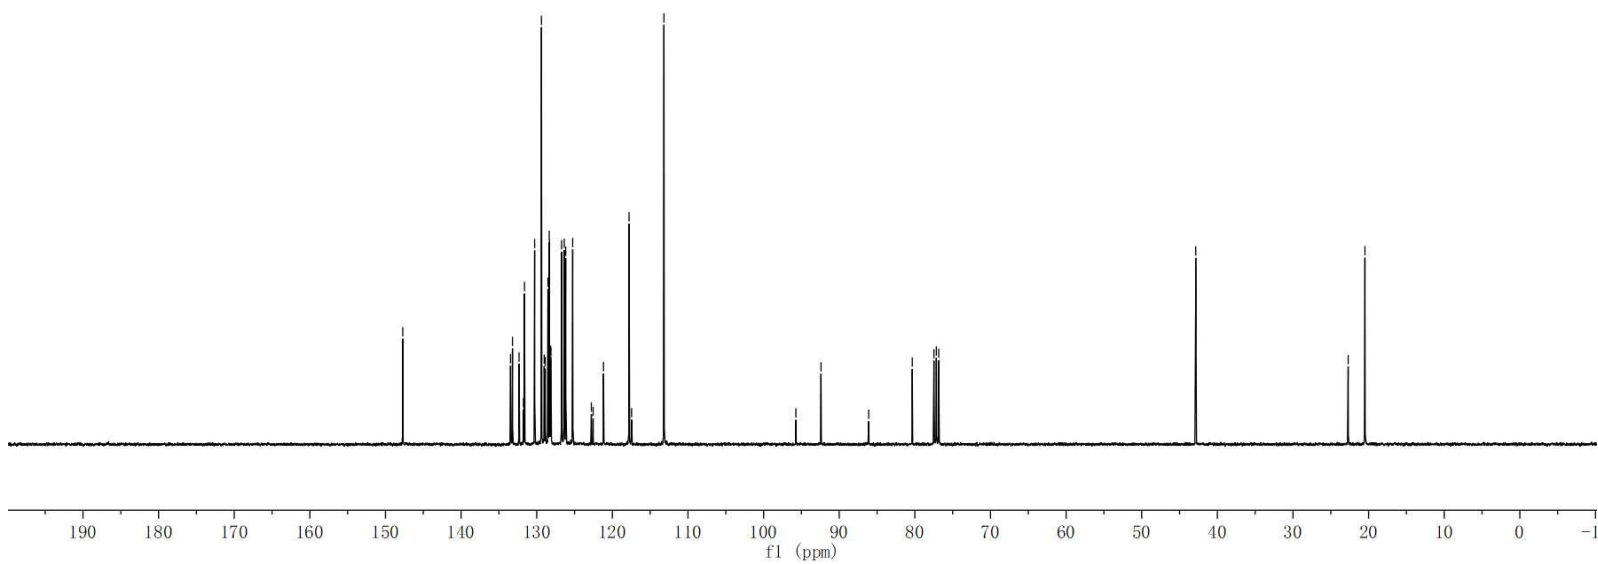



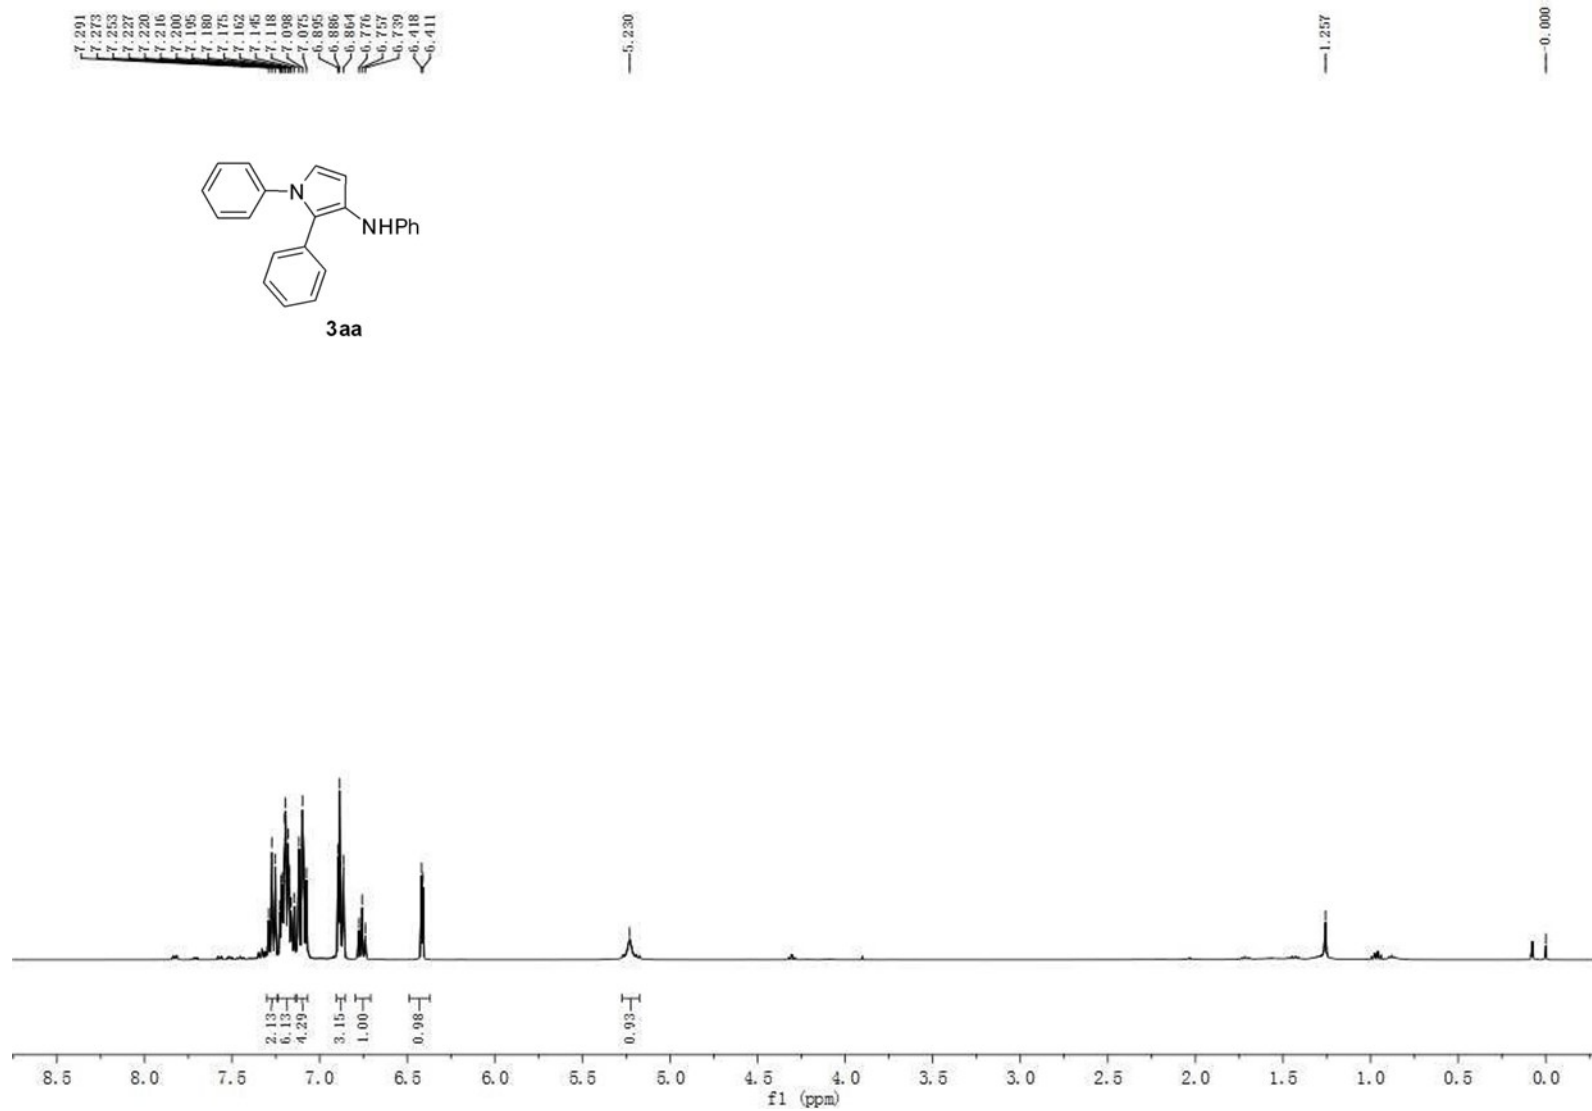

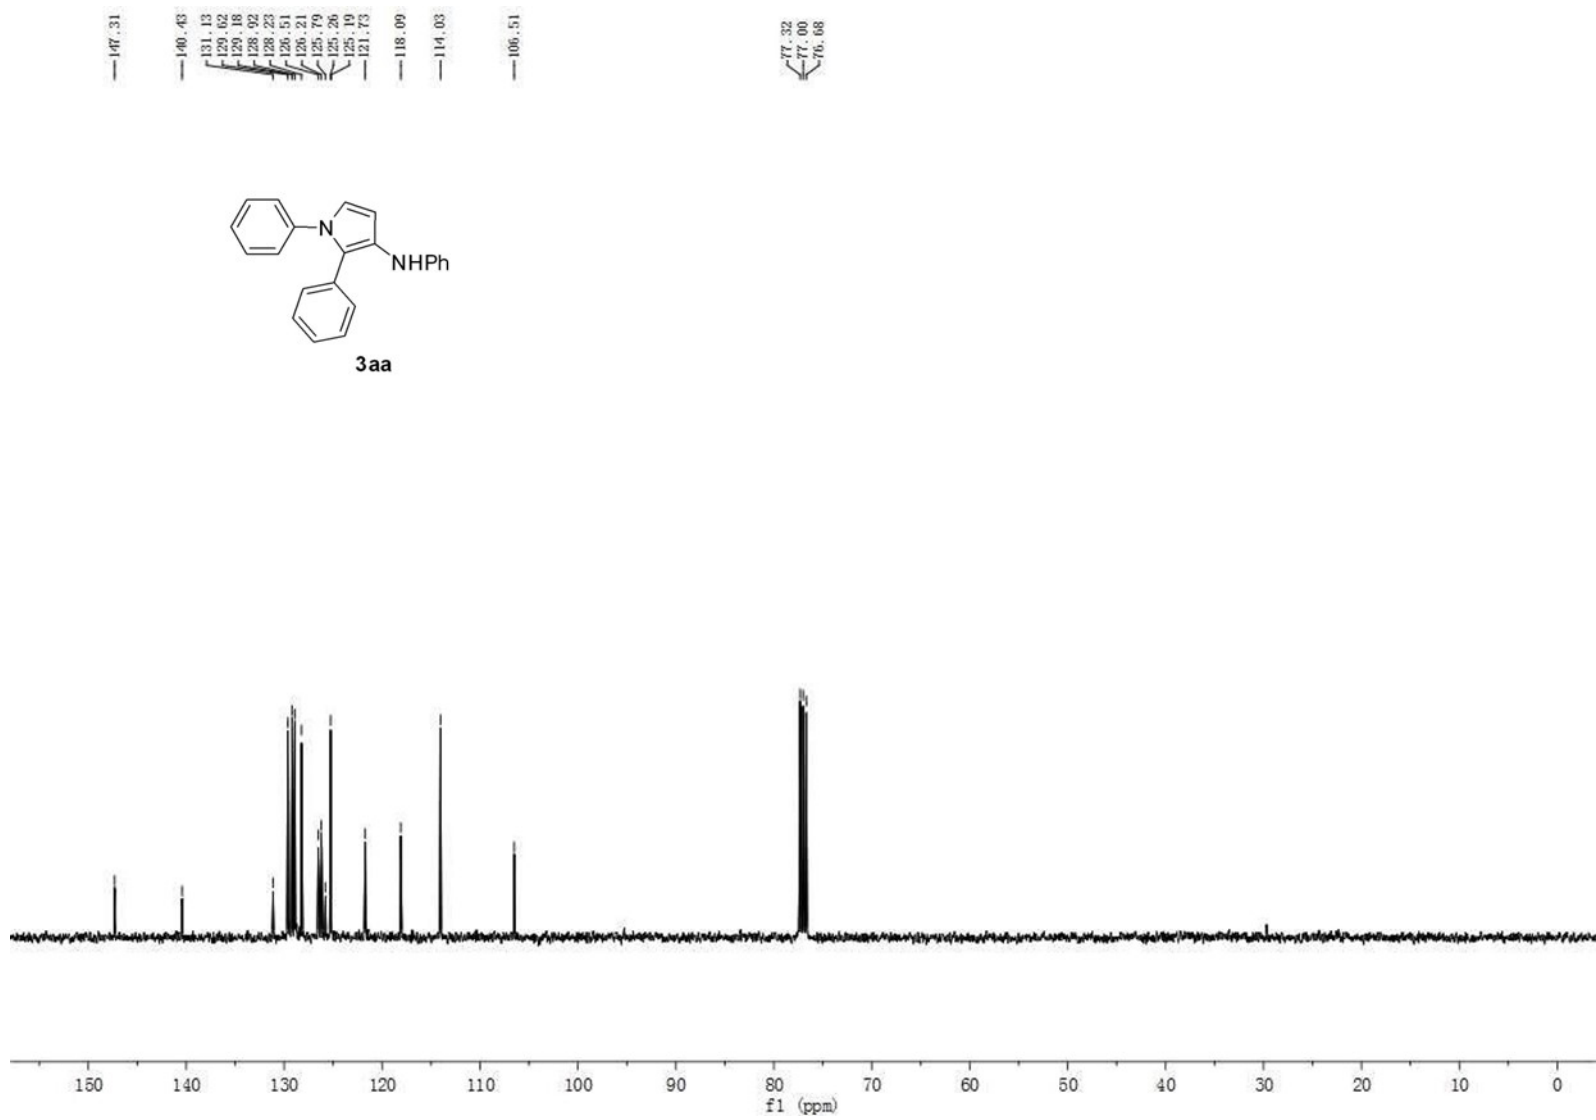

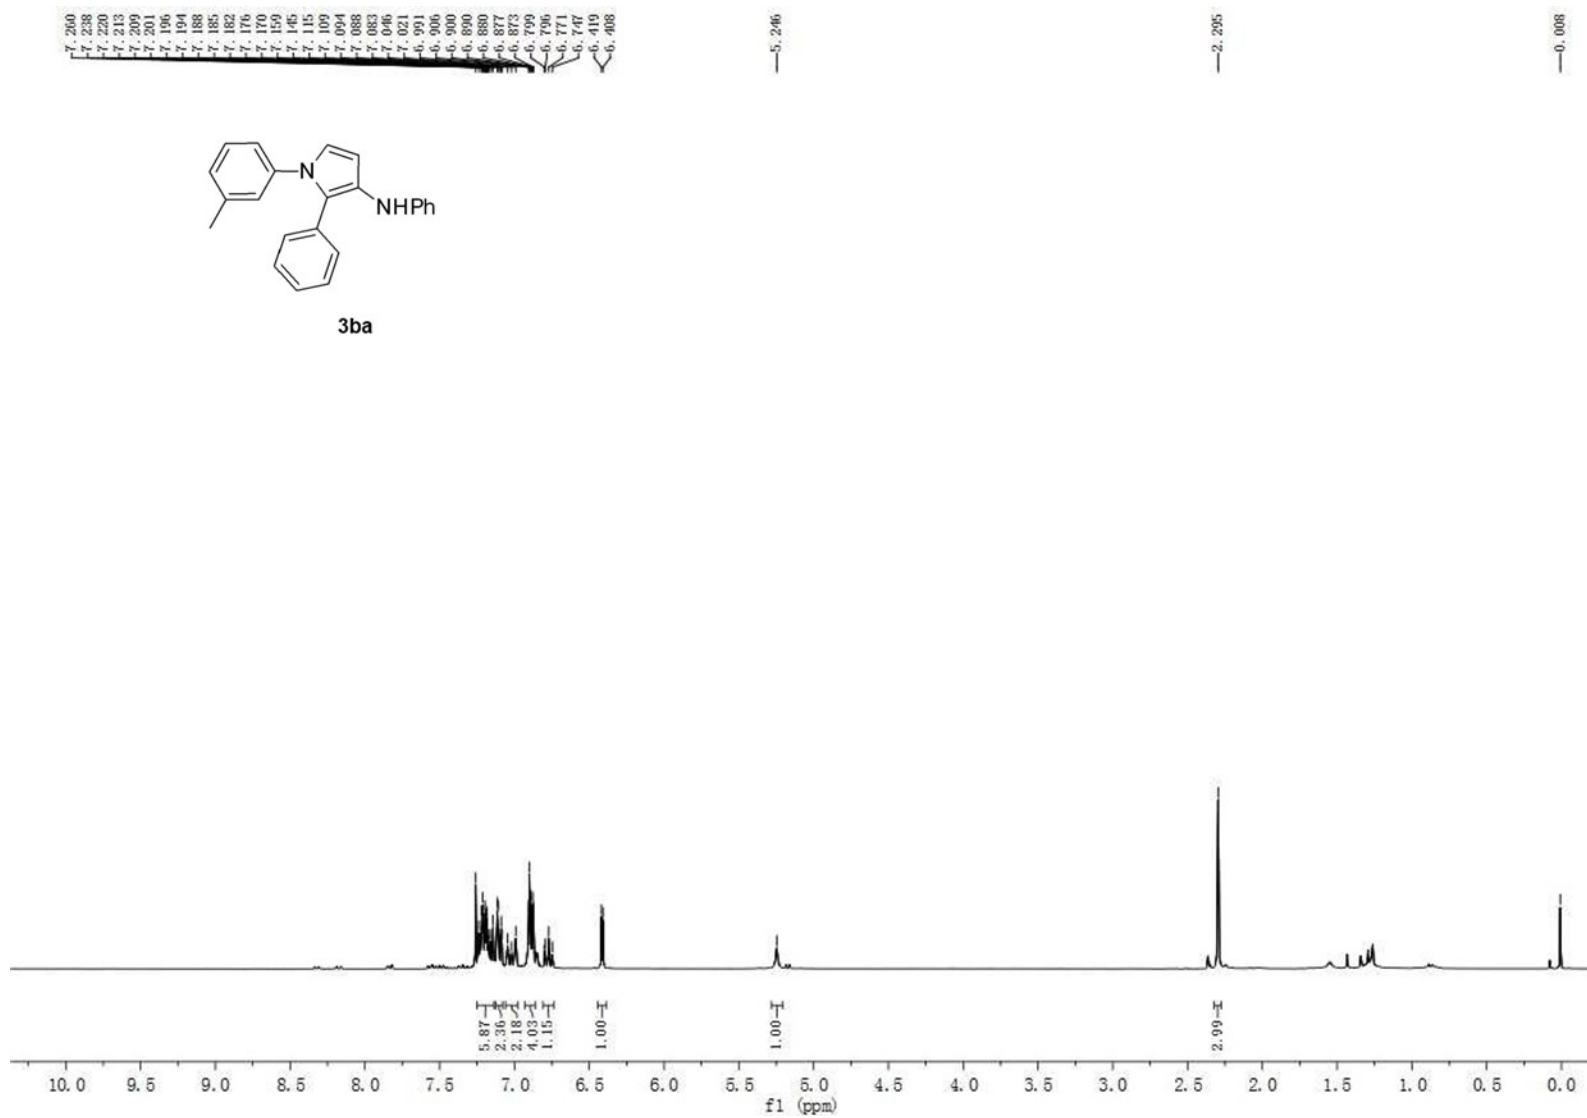

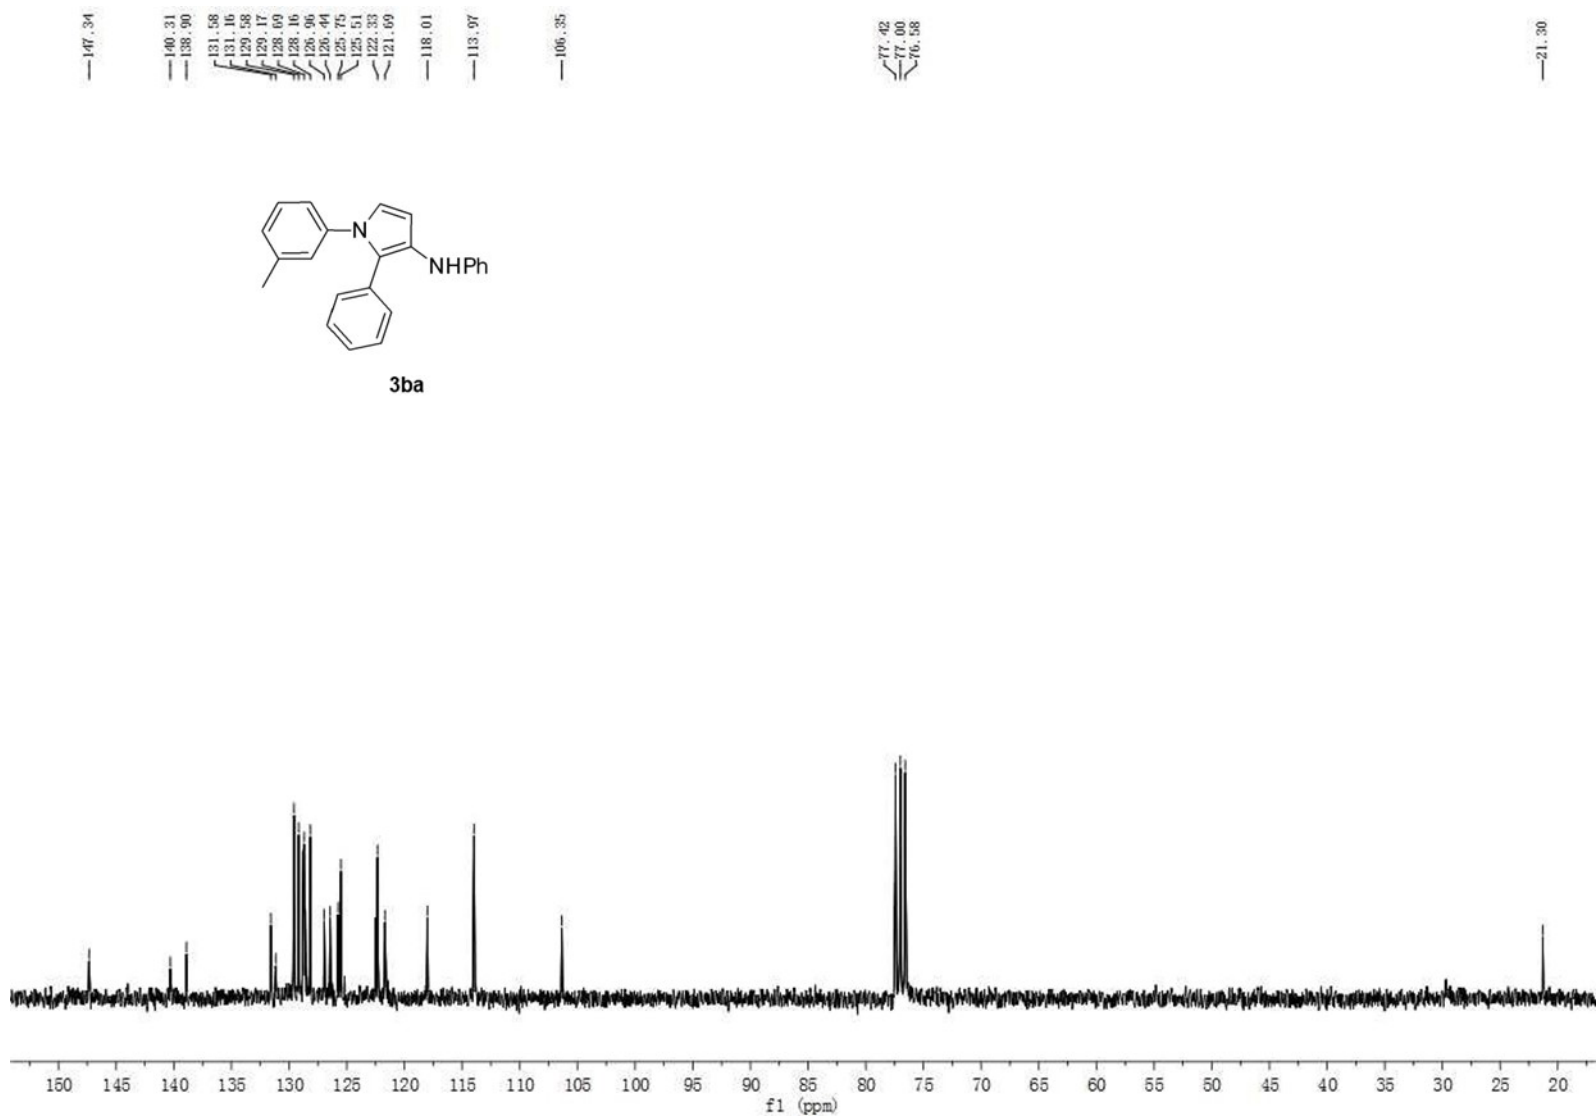

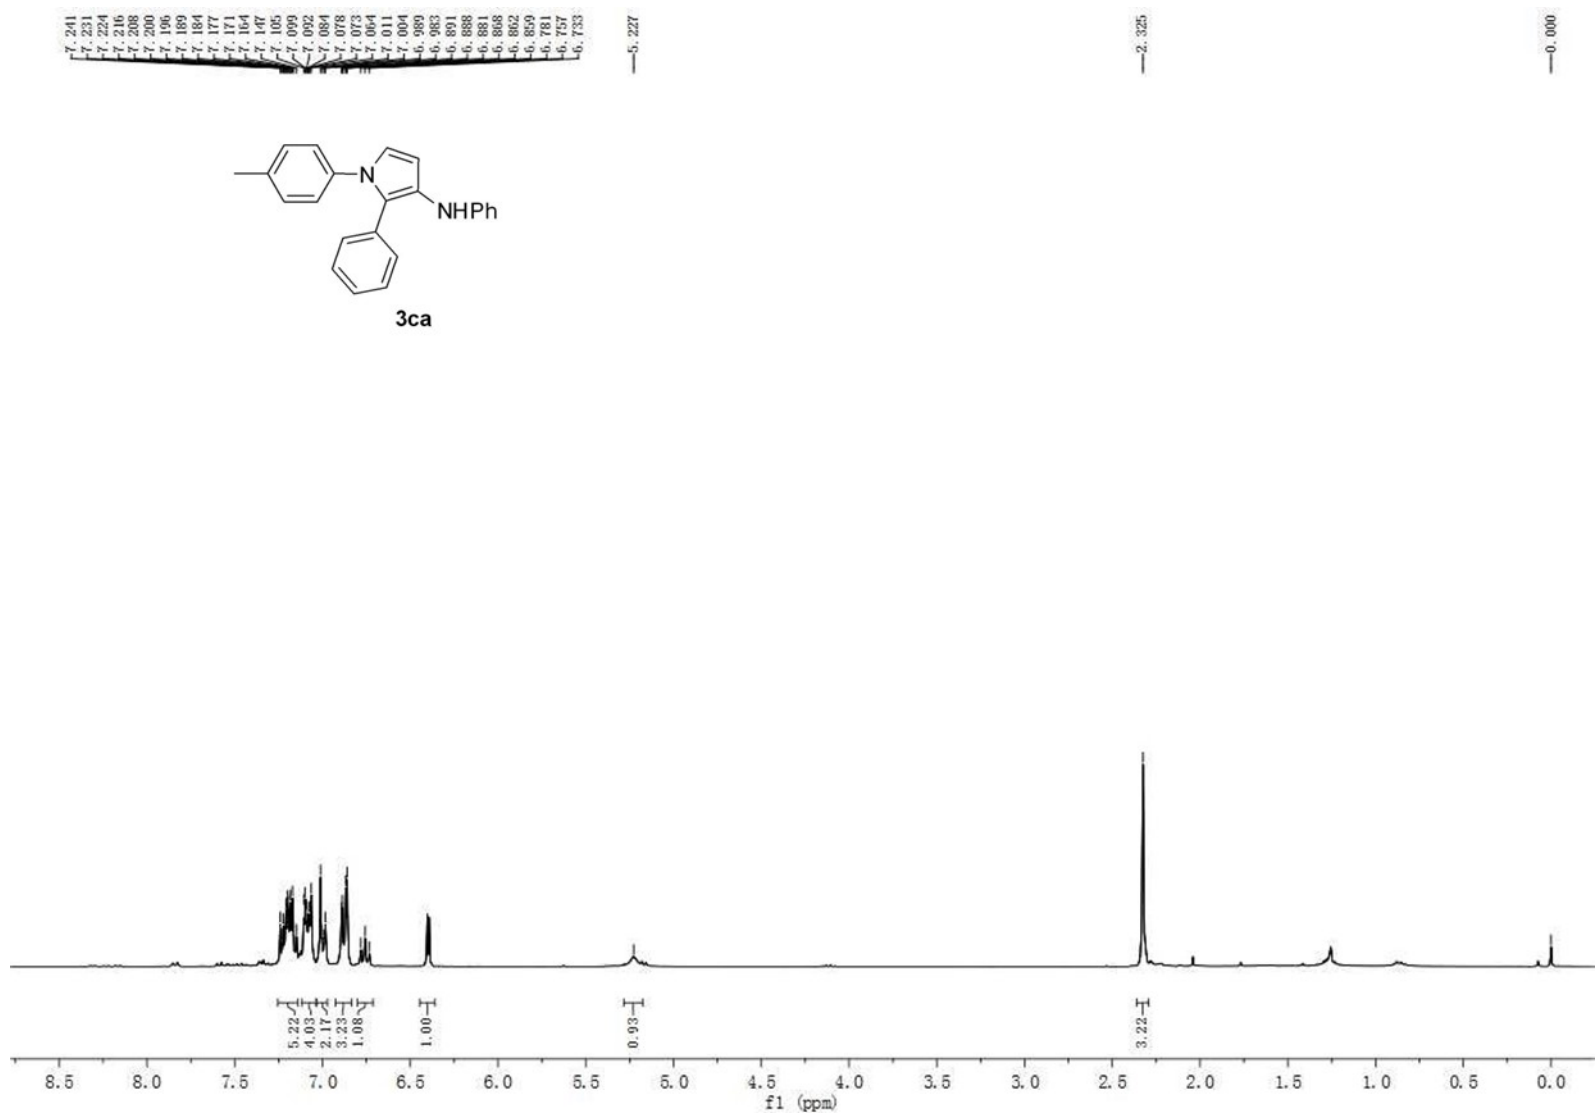

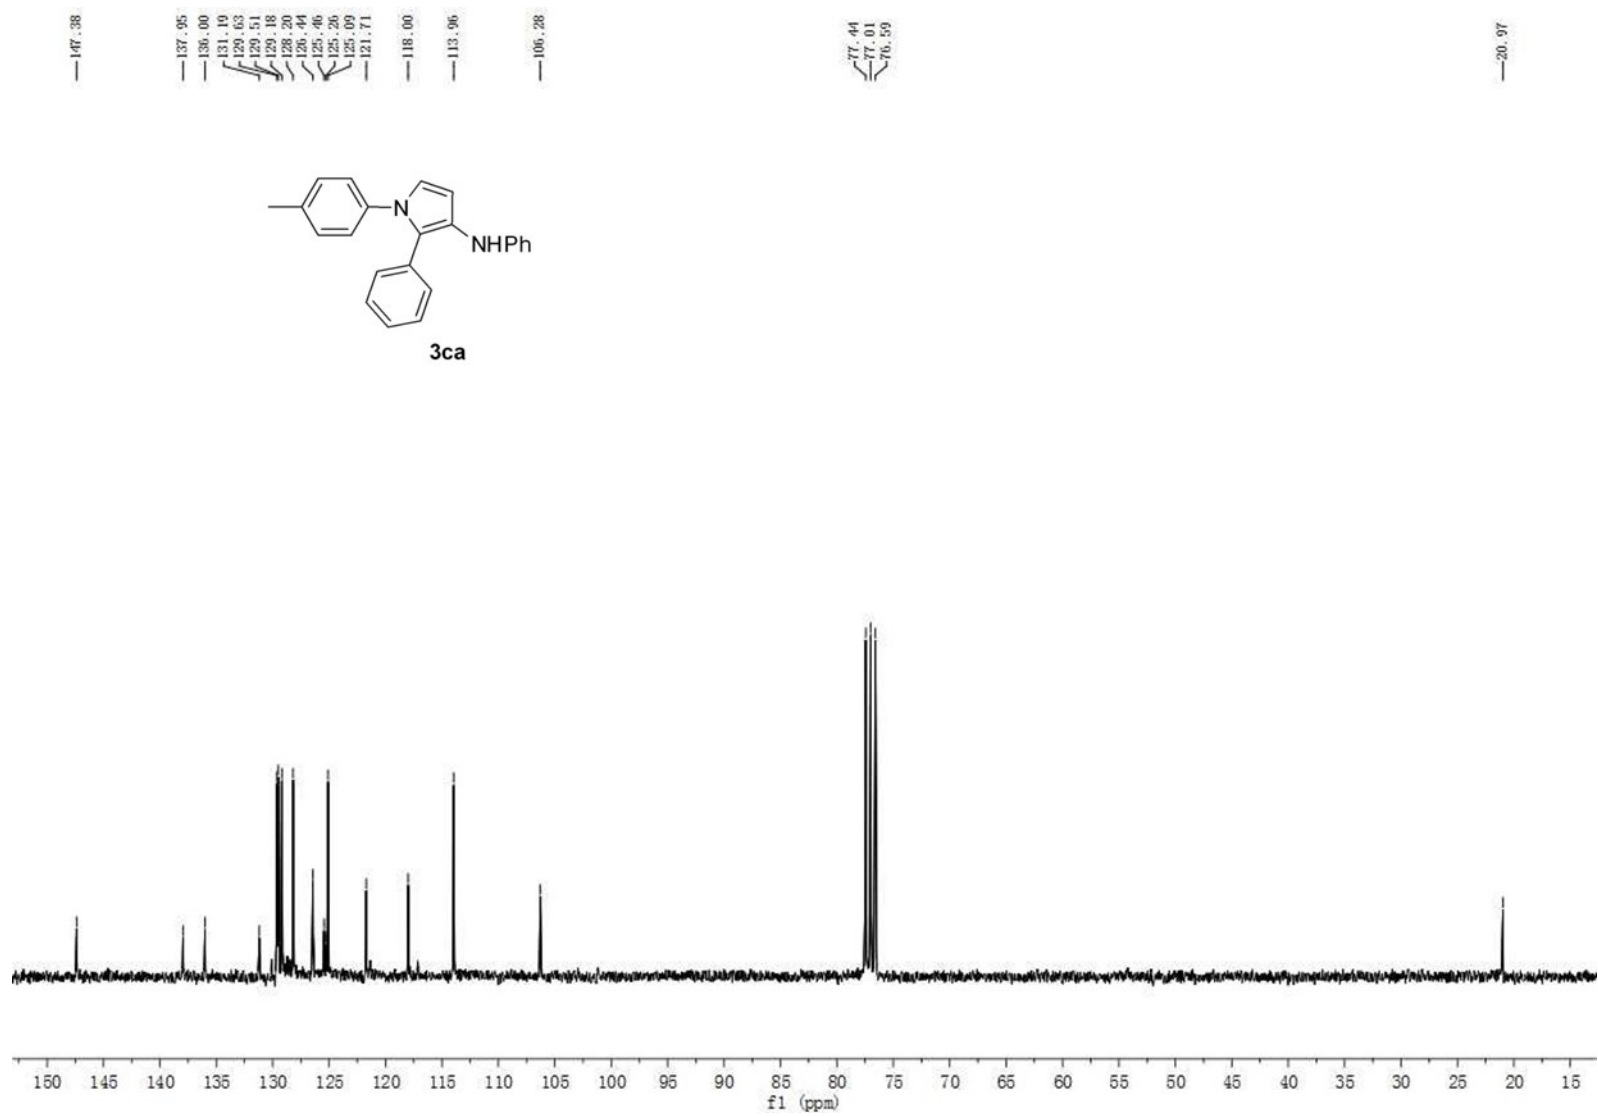

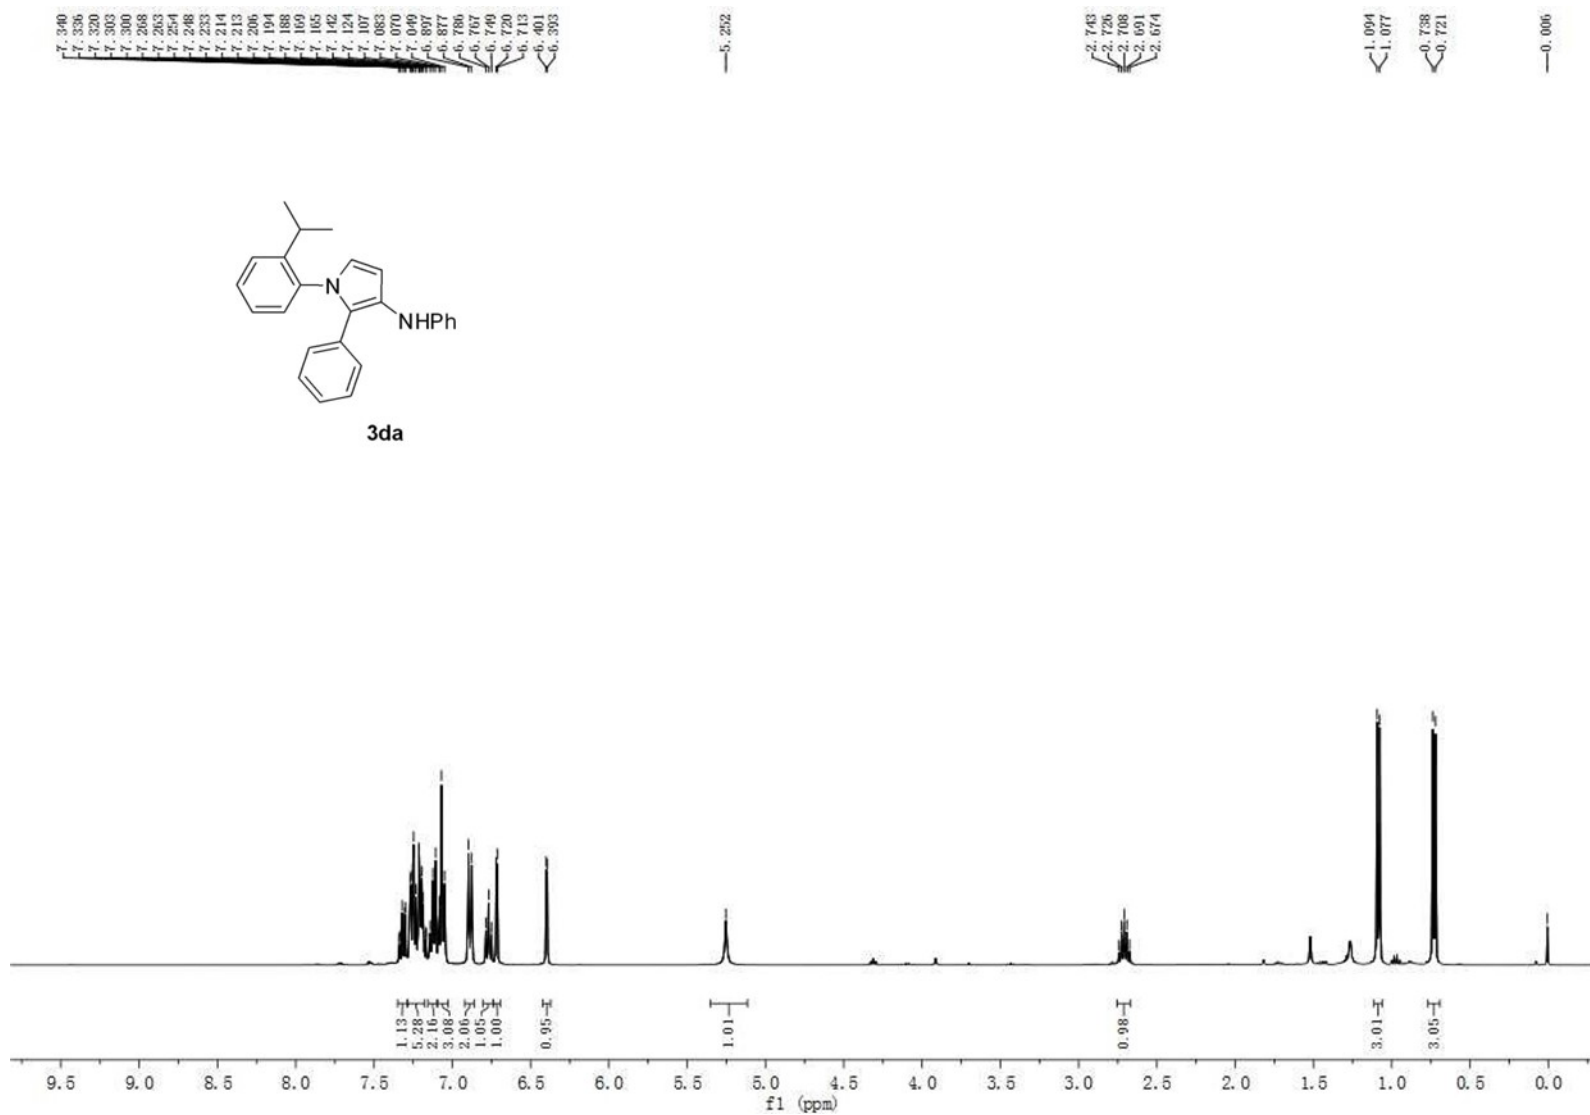

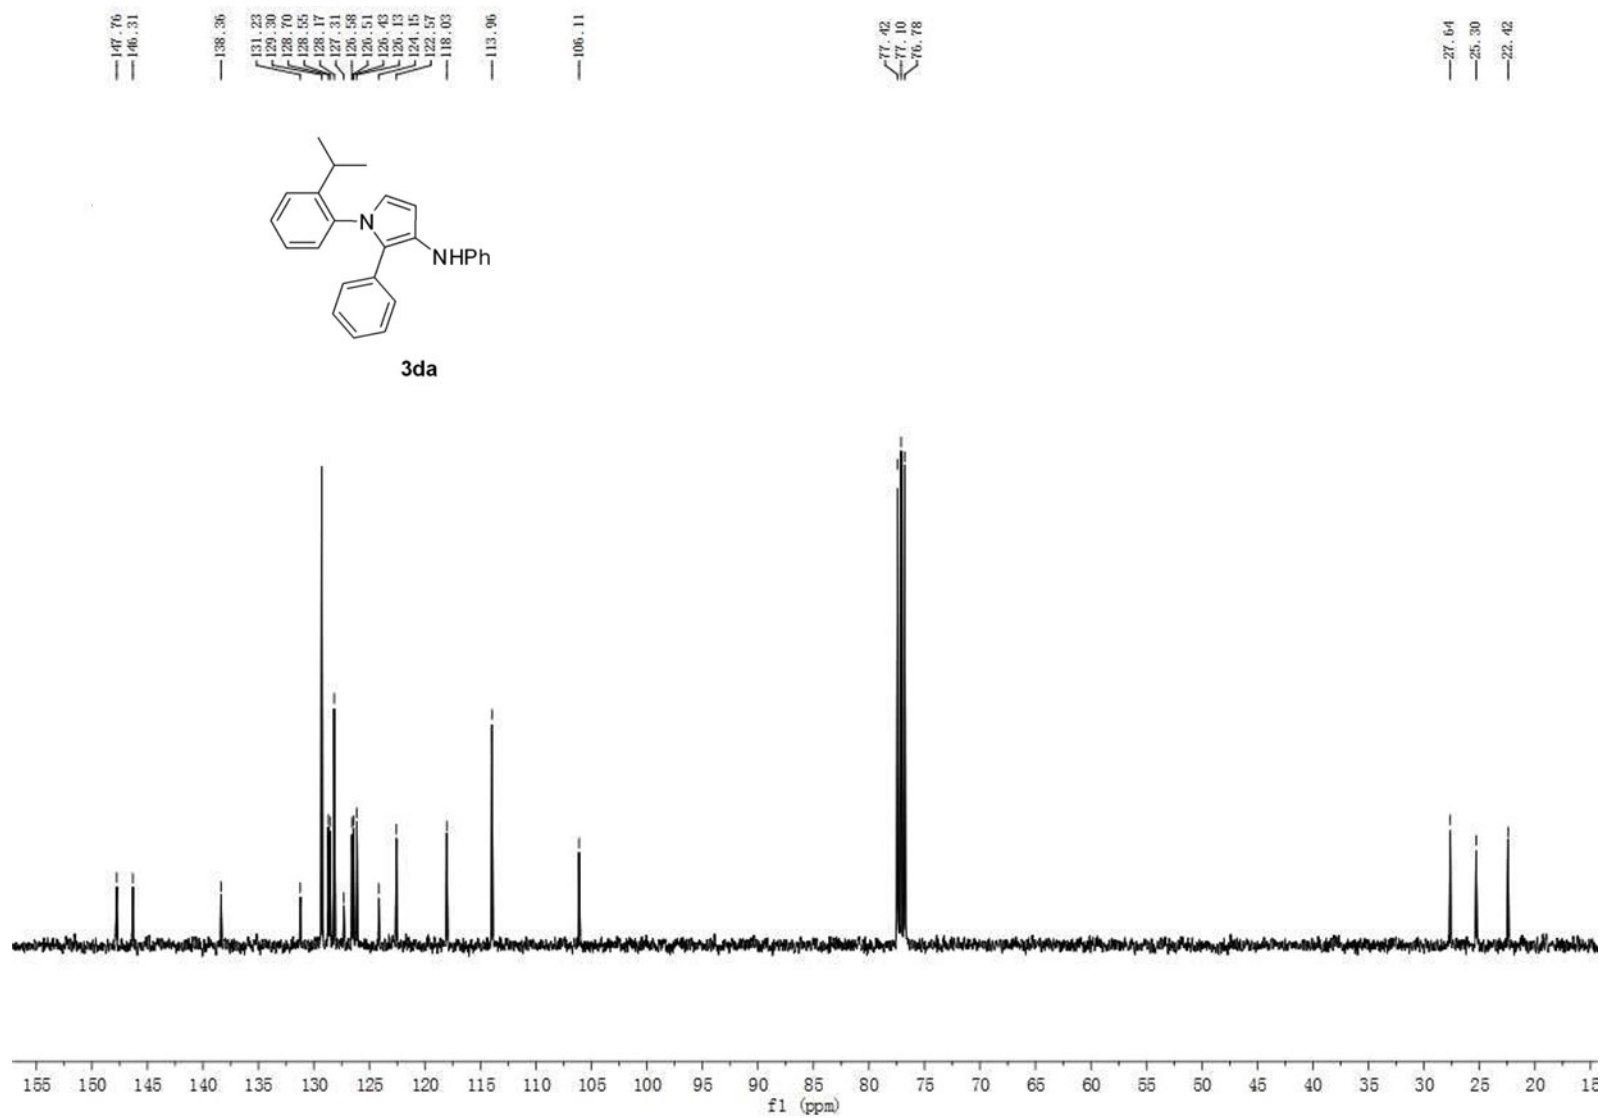



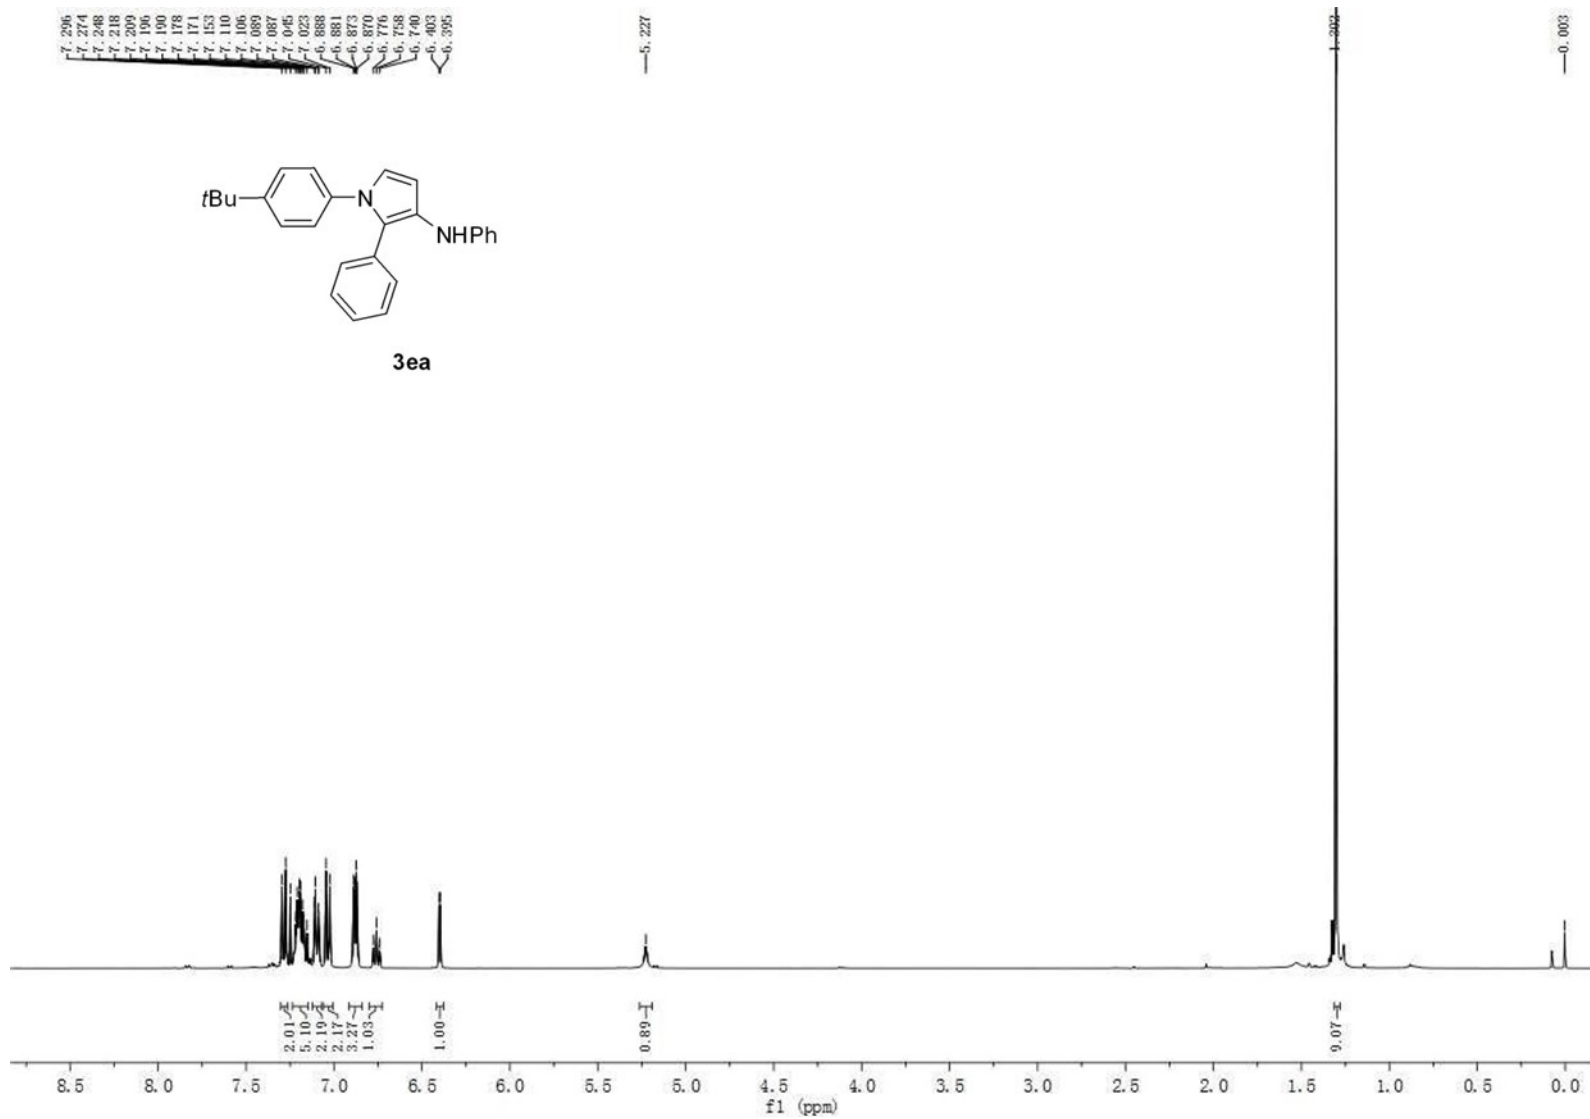

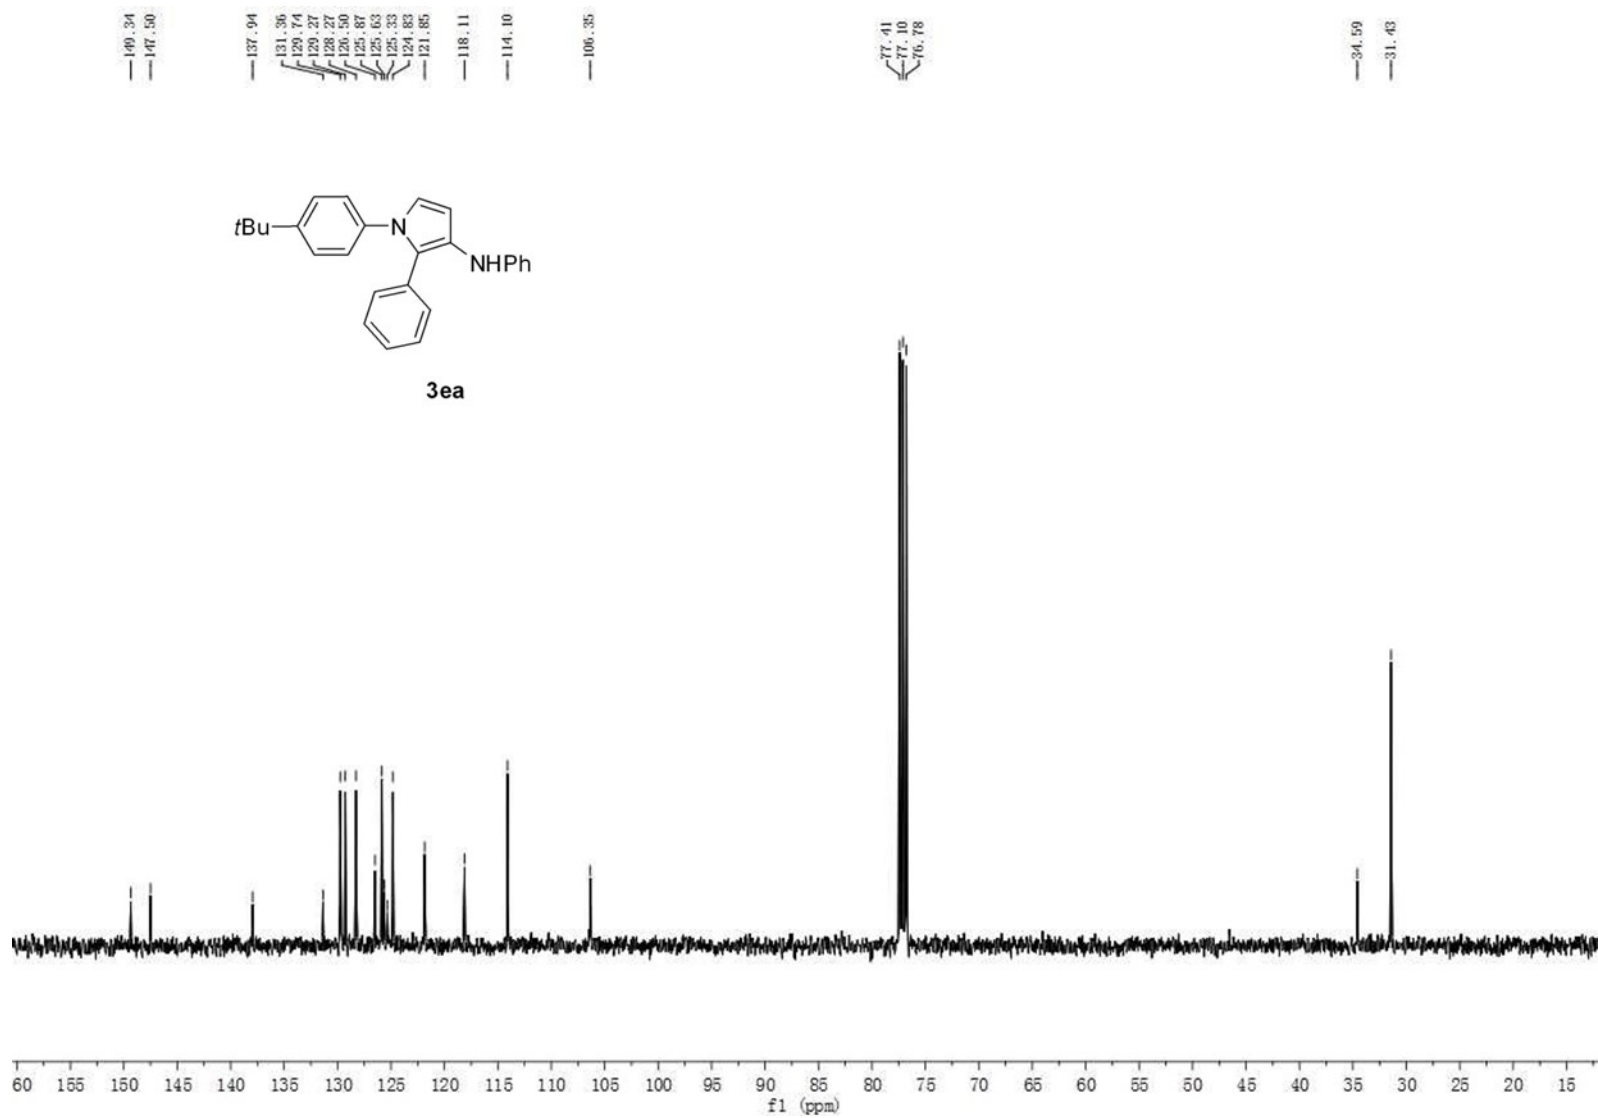

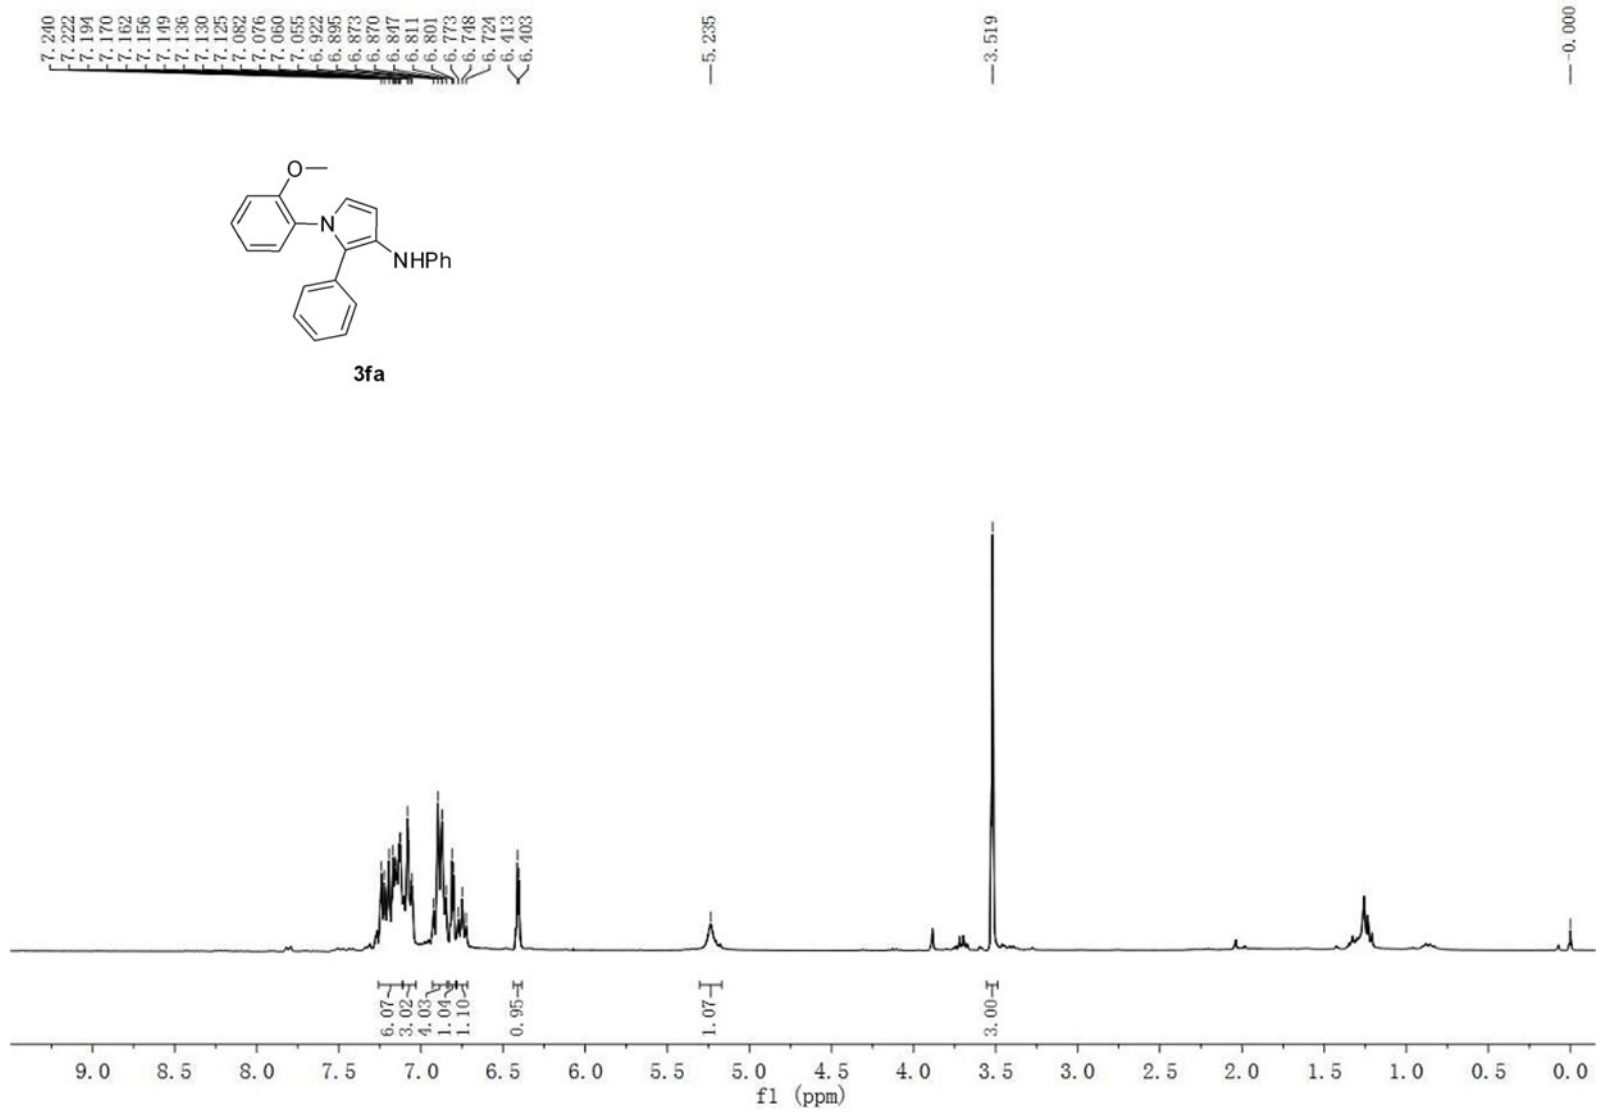

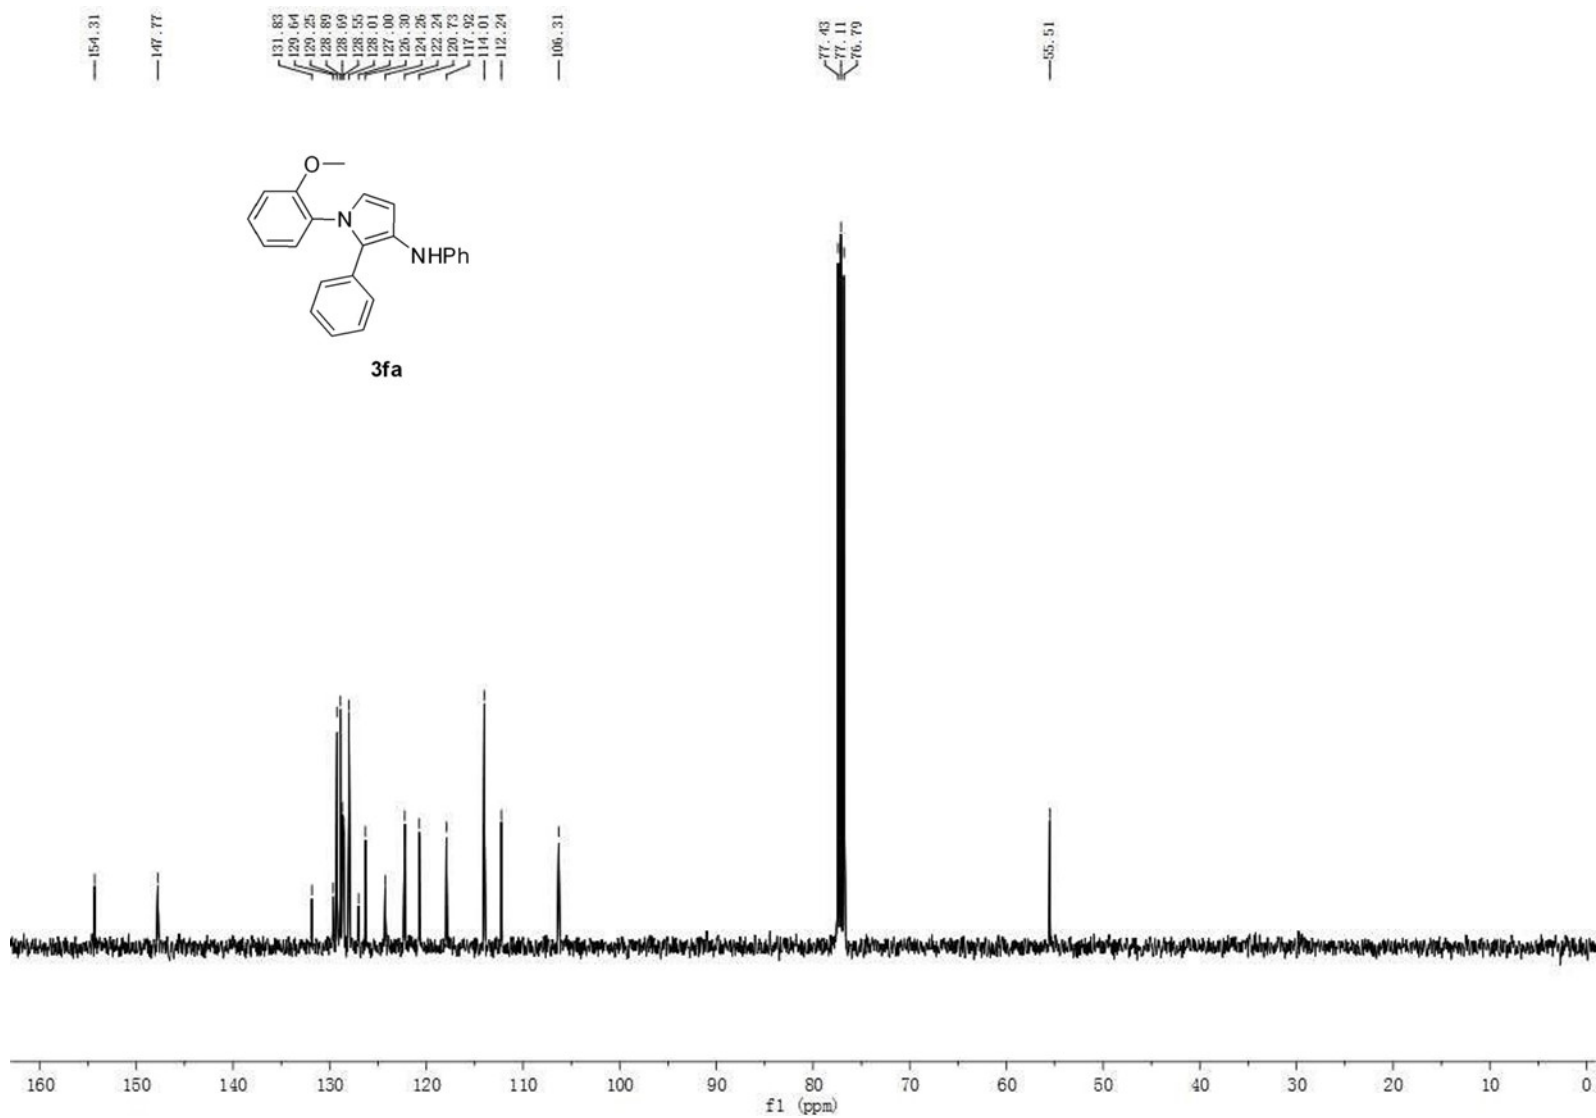

7.250  
7.246  
7.233  
7.229  
7.213  
7.210  
7.192  
7.179  
7.174  
7.089  
7.085  
7.068  
7.044  
7.039  
7.027  
7.022  
6.875  
6.853  
6.847  
6.783  
6.765  
6.747  
6.726  
6.718

5.226

0.000

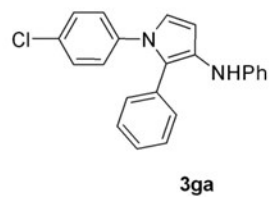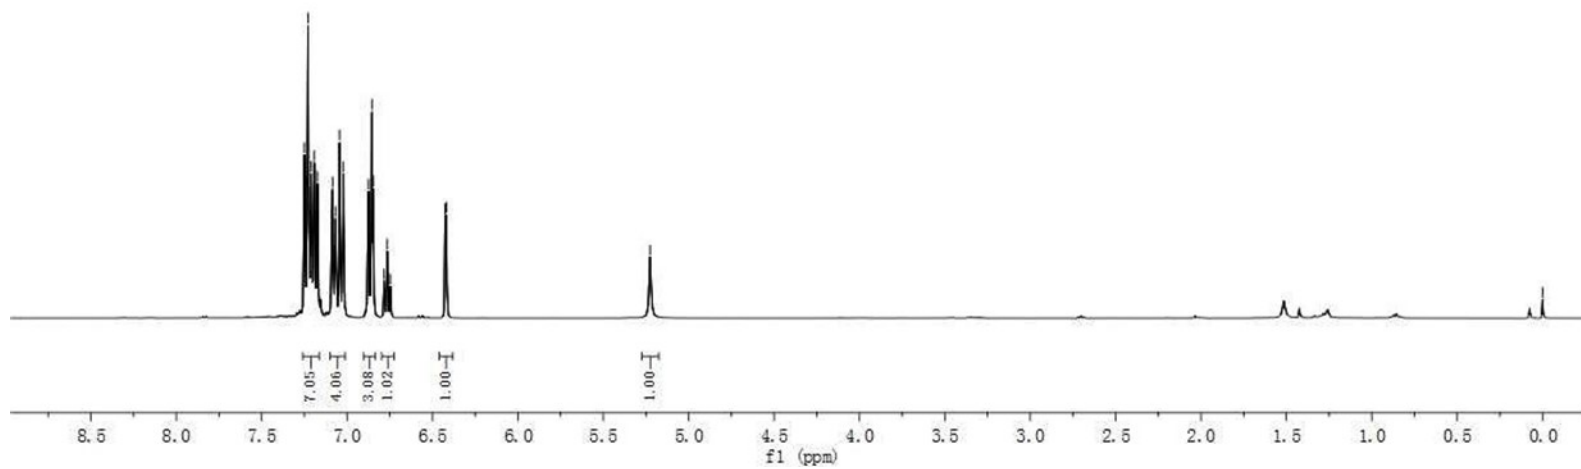

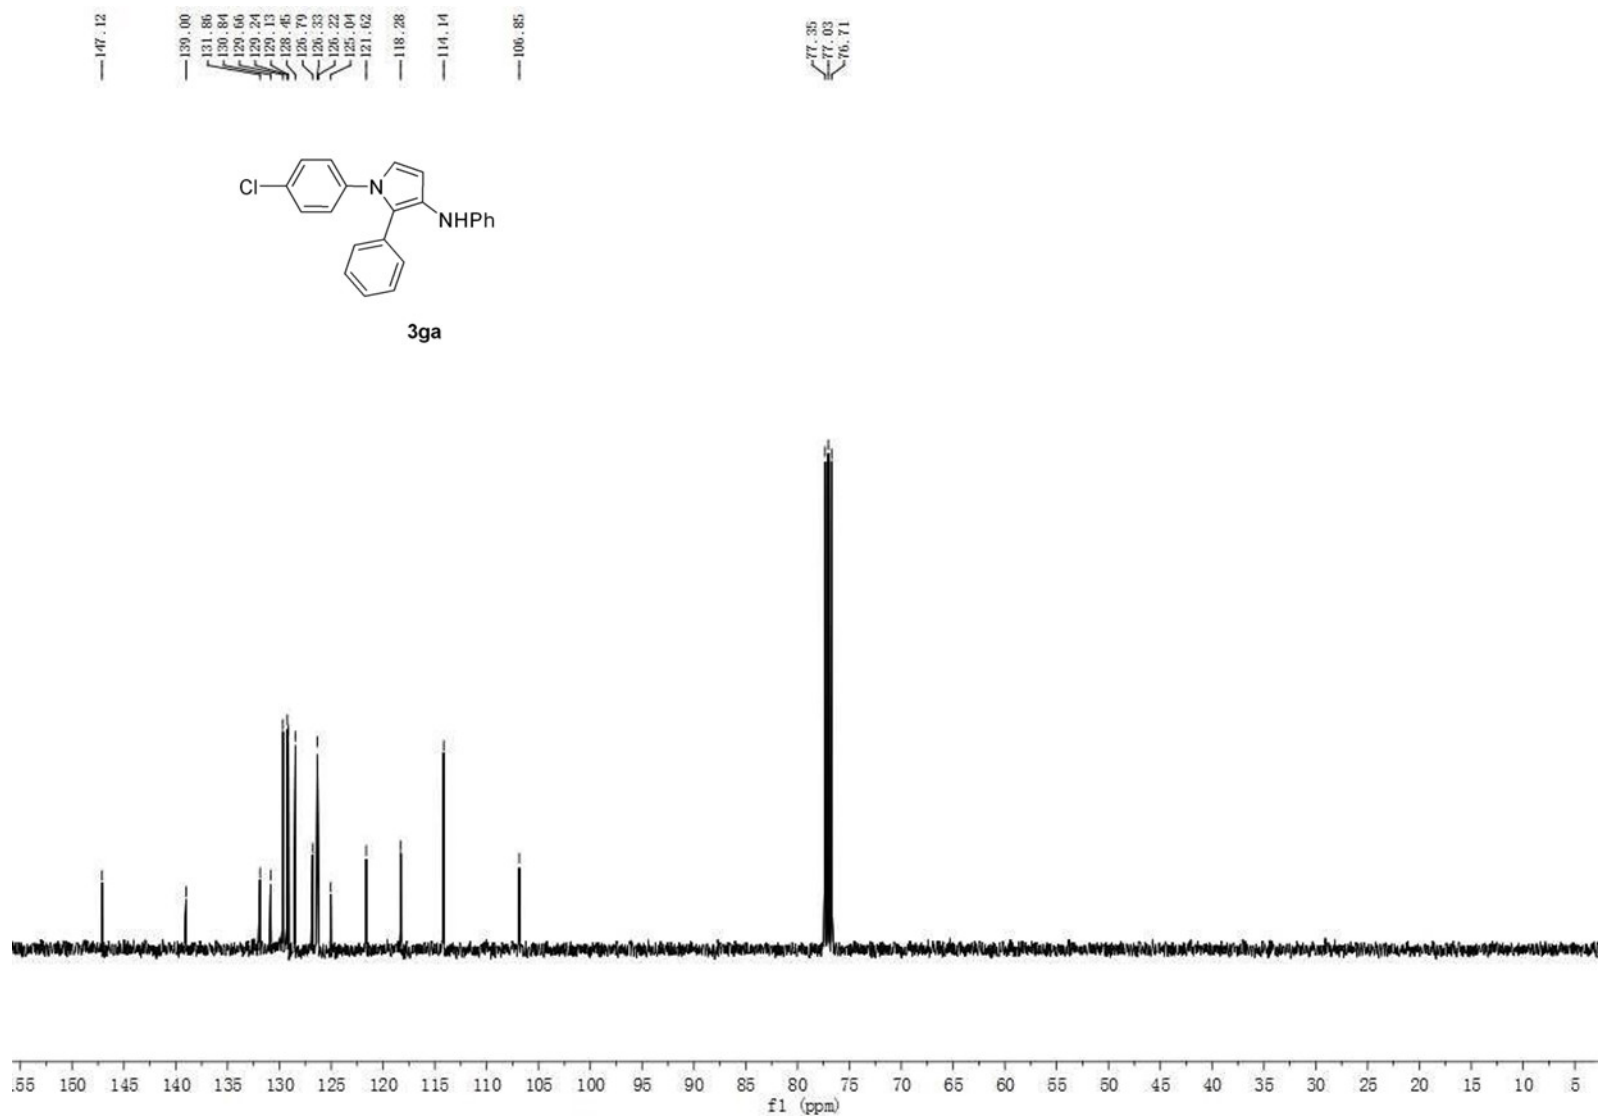

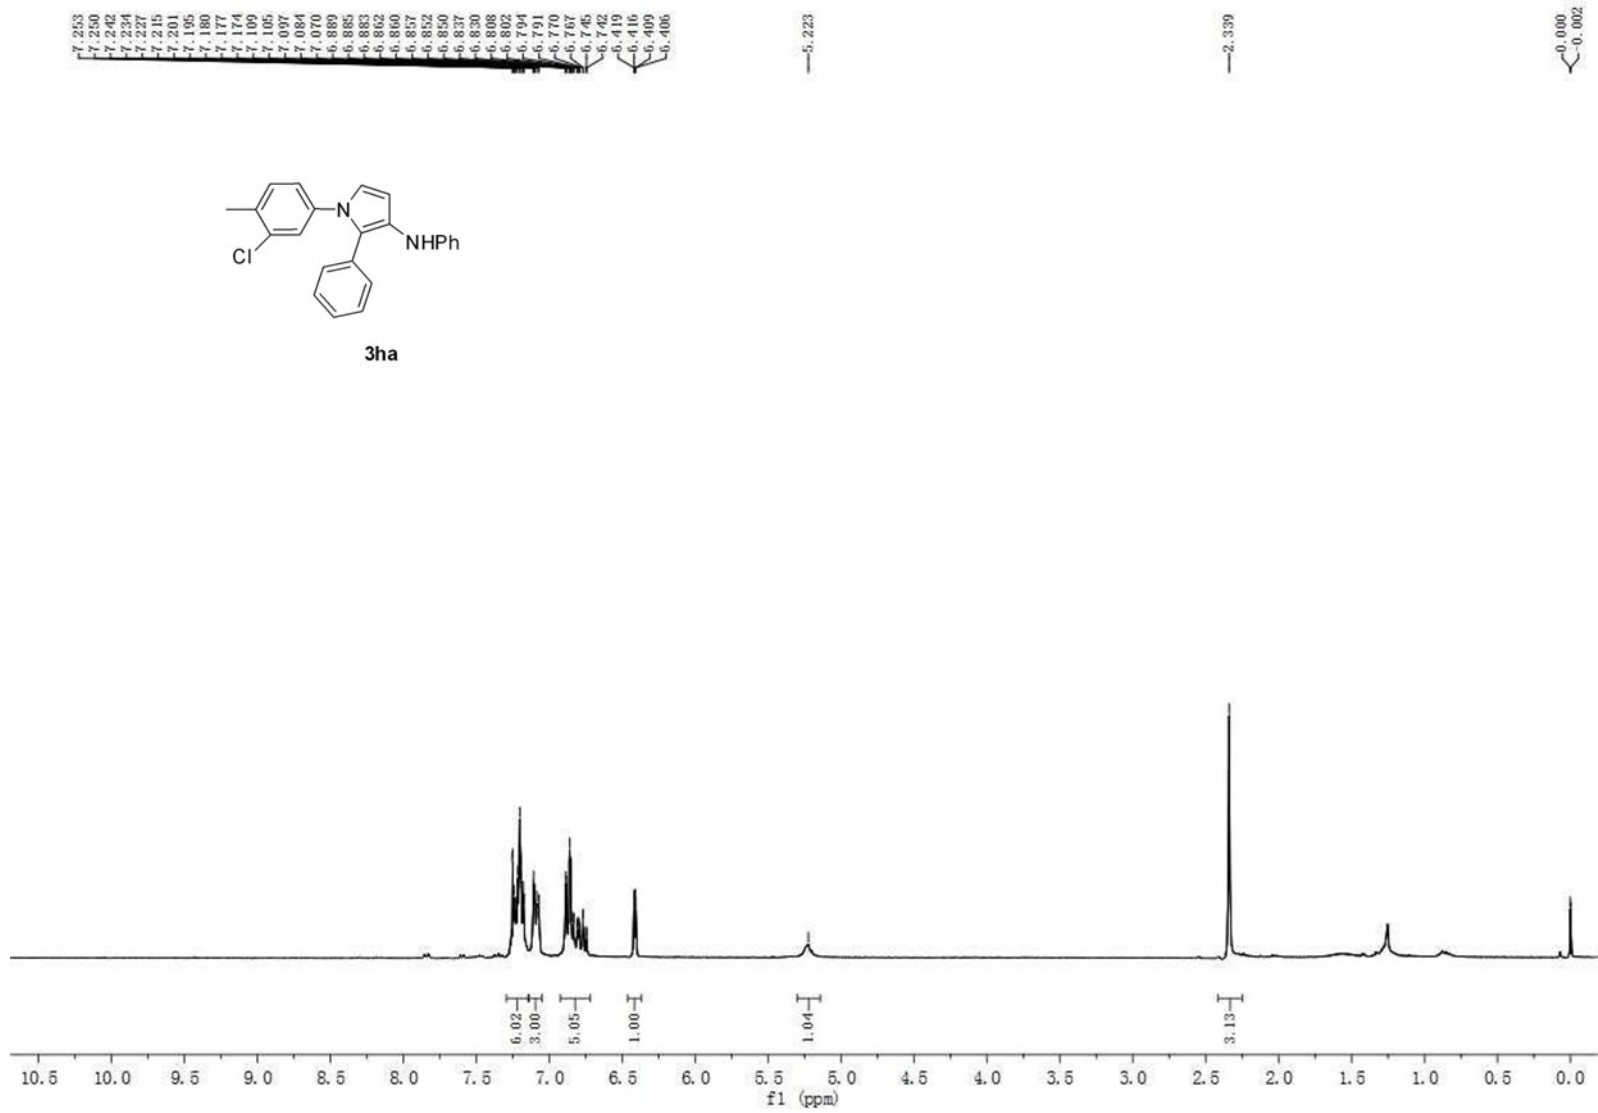

147.90  
139.94  
135.12  
134.77  
131.68  
131.57  
130.39  
129.98  
129.15  
127.51  
126.70  
126.15  
124.35  
122.39  
118.83

107.46

78.20  
77.78  
77.35

20.36

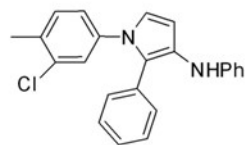

3ha

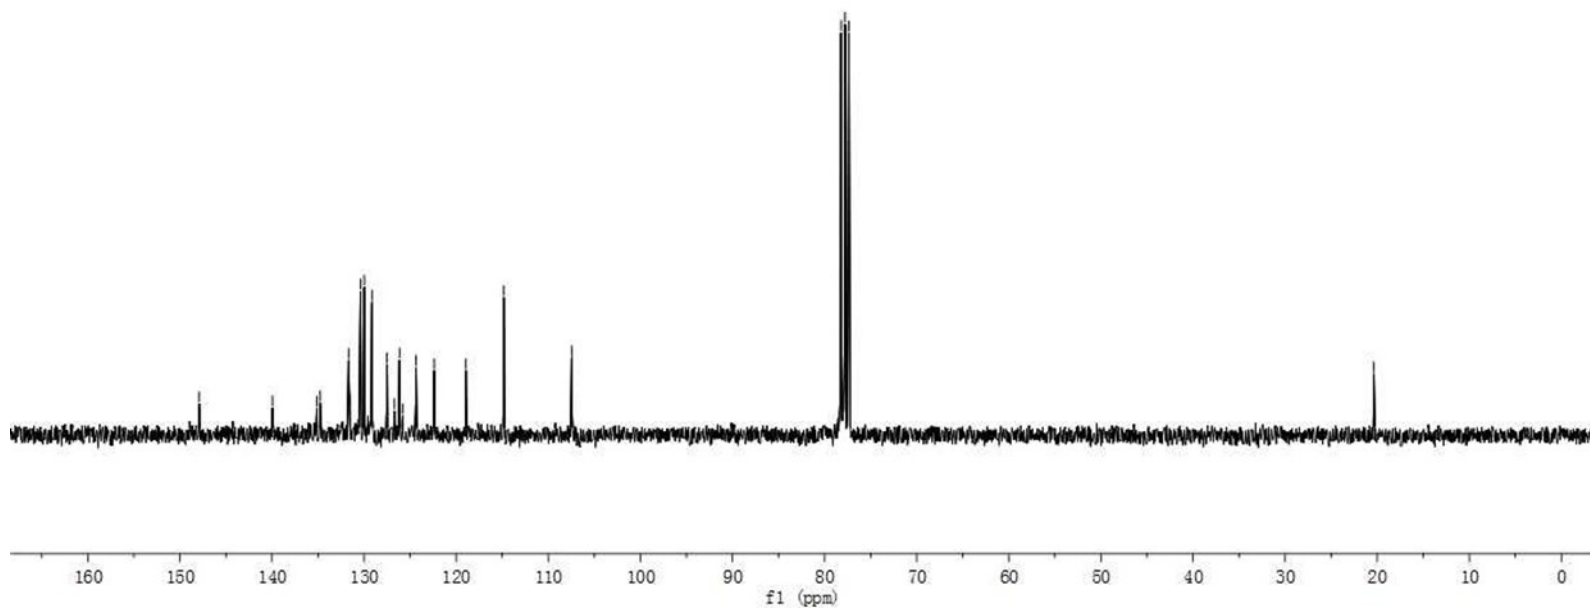



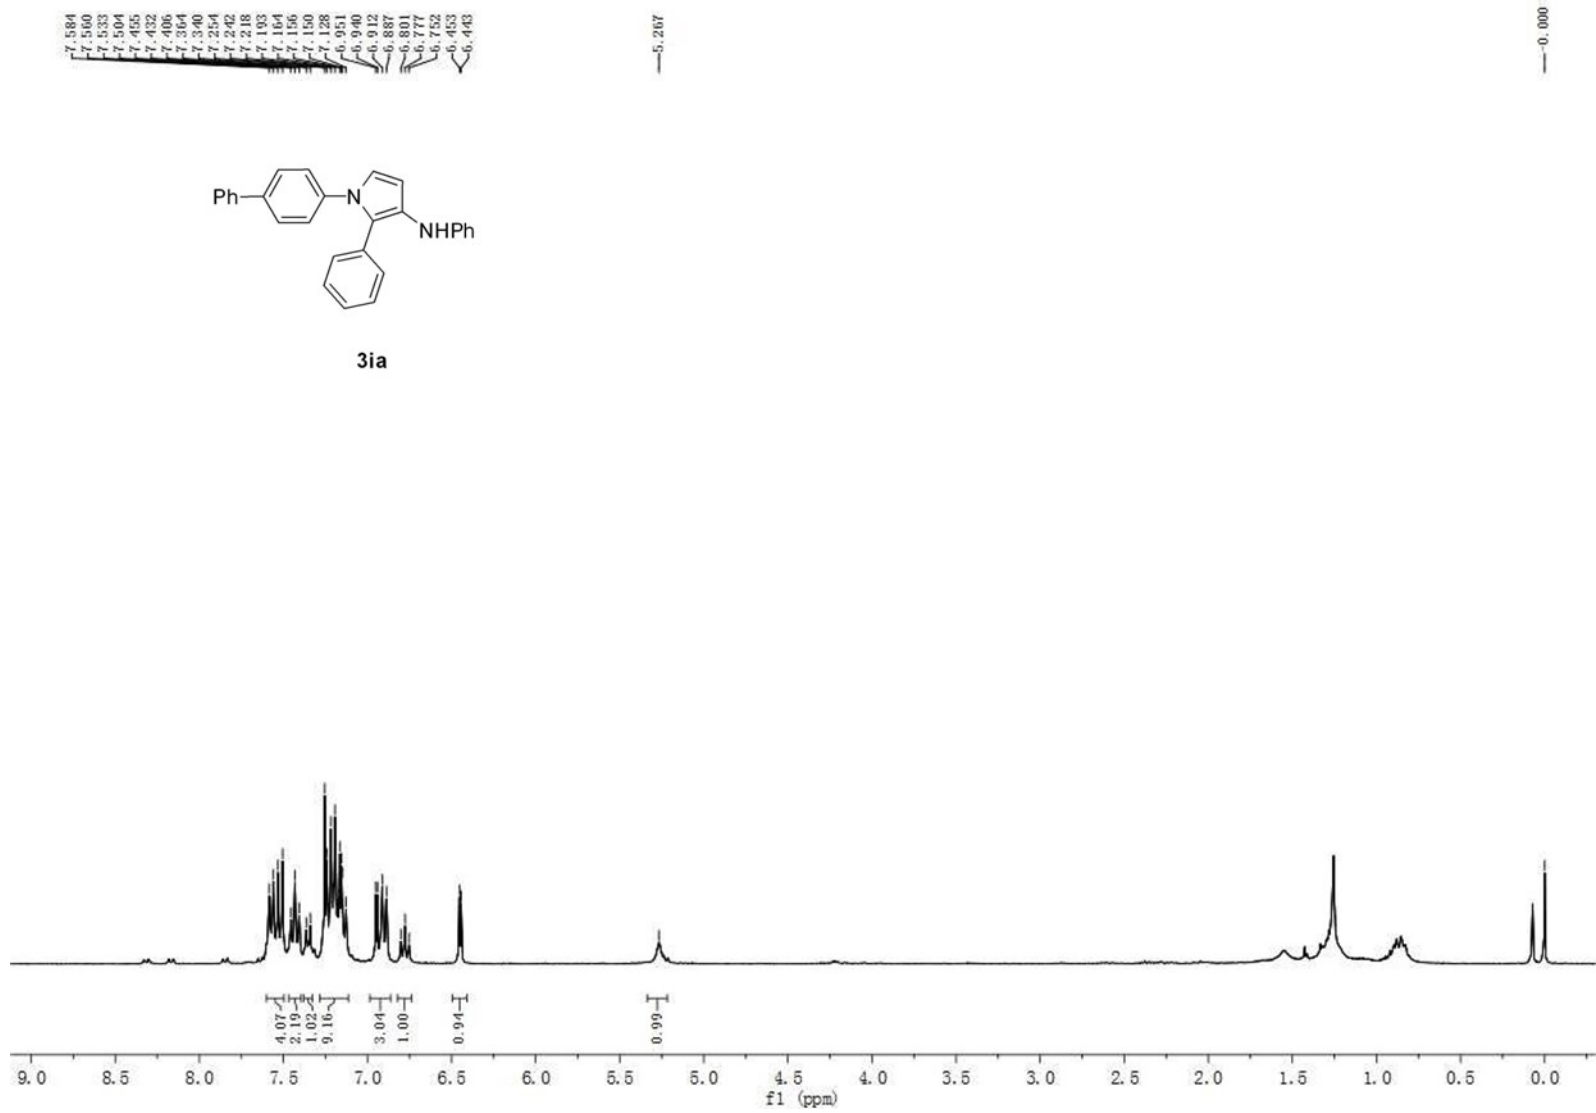

148.60  
141.40  
140.93  
140.28  
131.04  
130.58  
130.19  
129.70  
128.88  
128.80  
128.28  
127.95  
126.63  
119.49  
115.41  
107.96

78.69  
78.37  
78.05

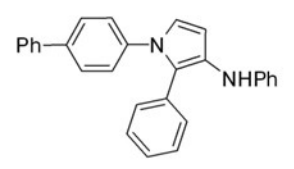

3ia

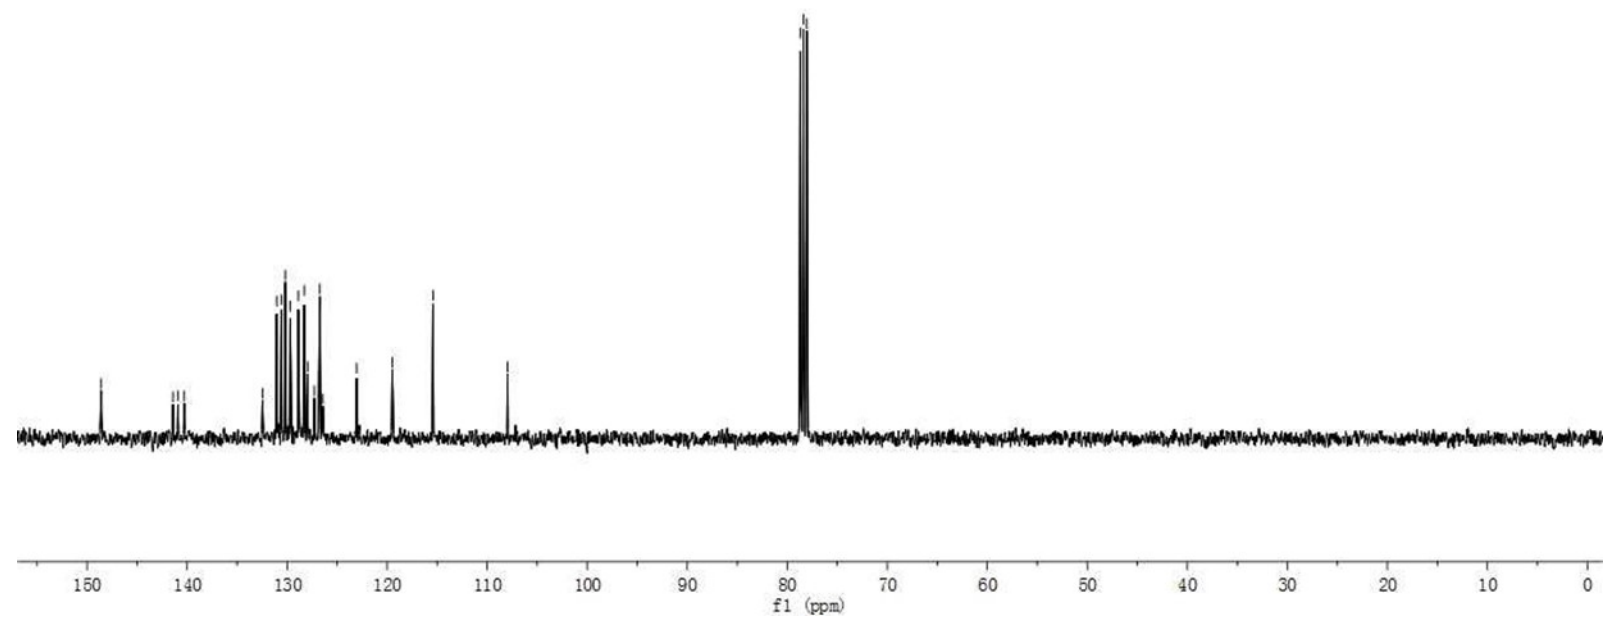

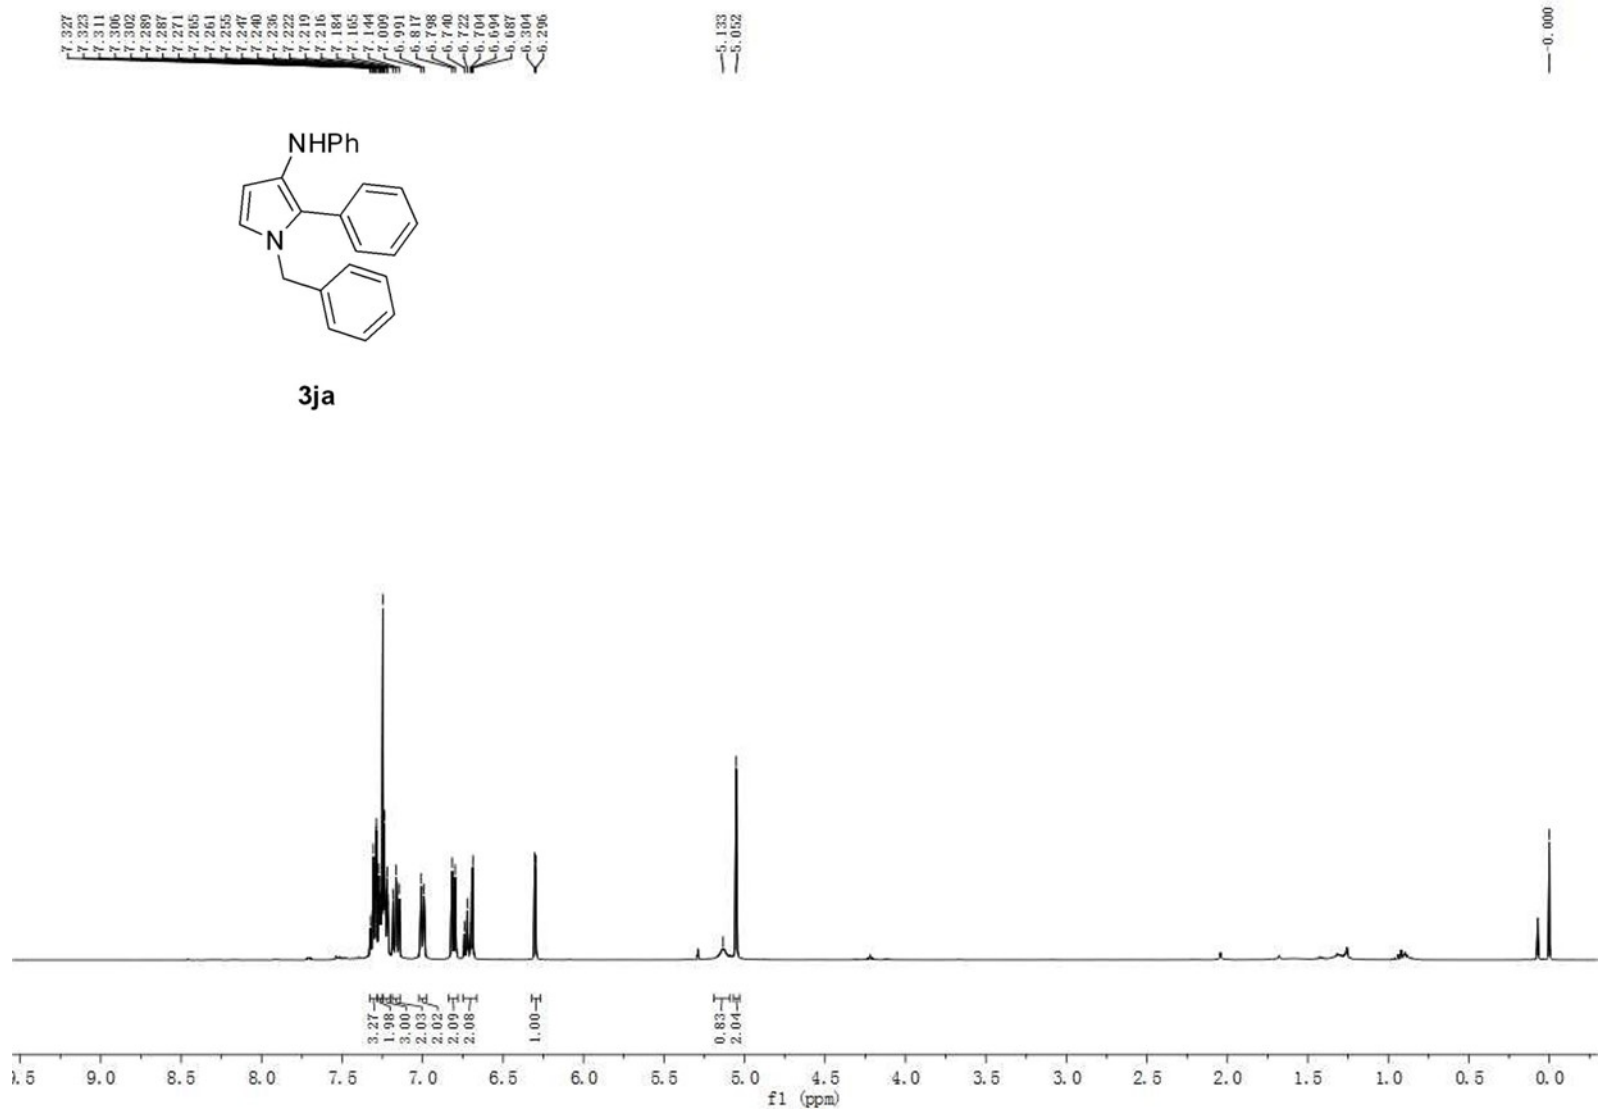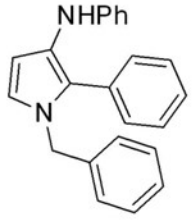

3ja

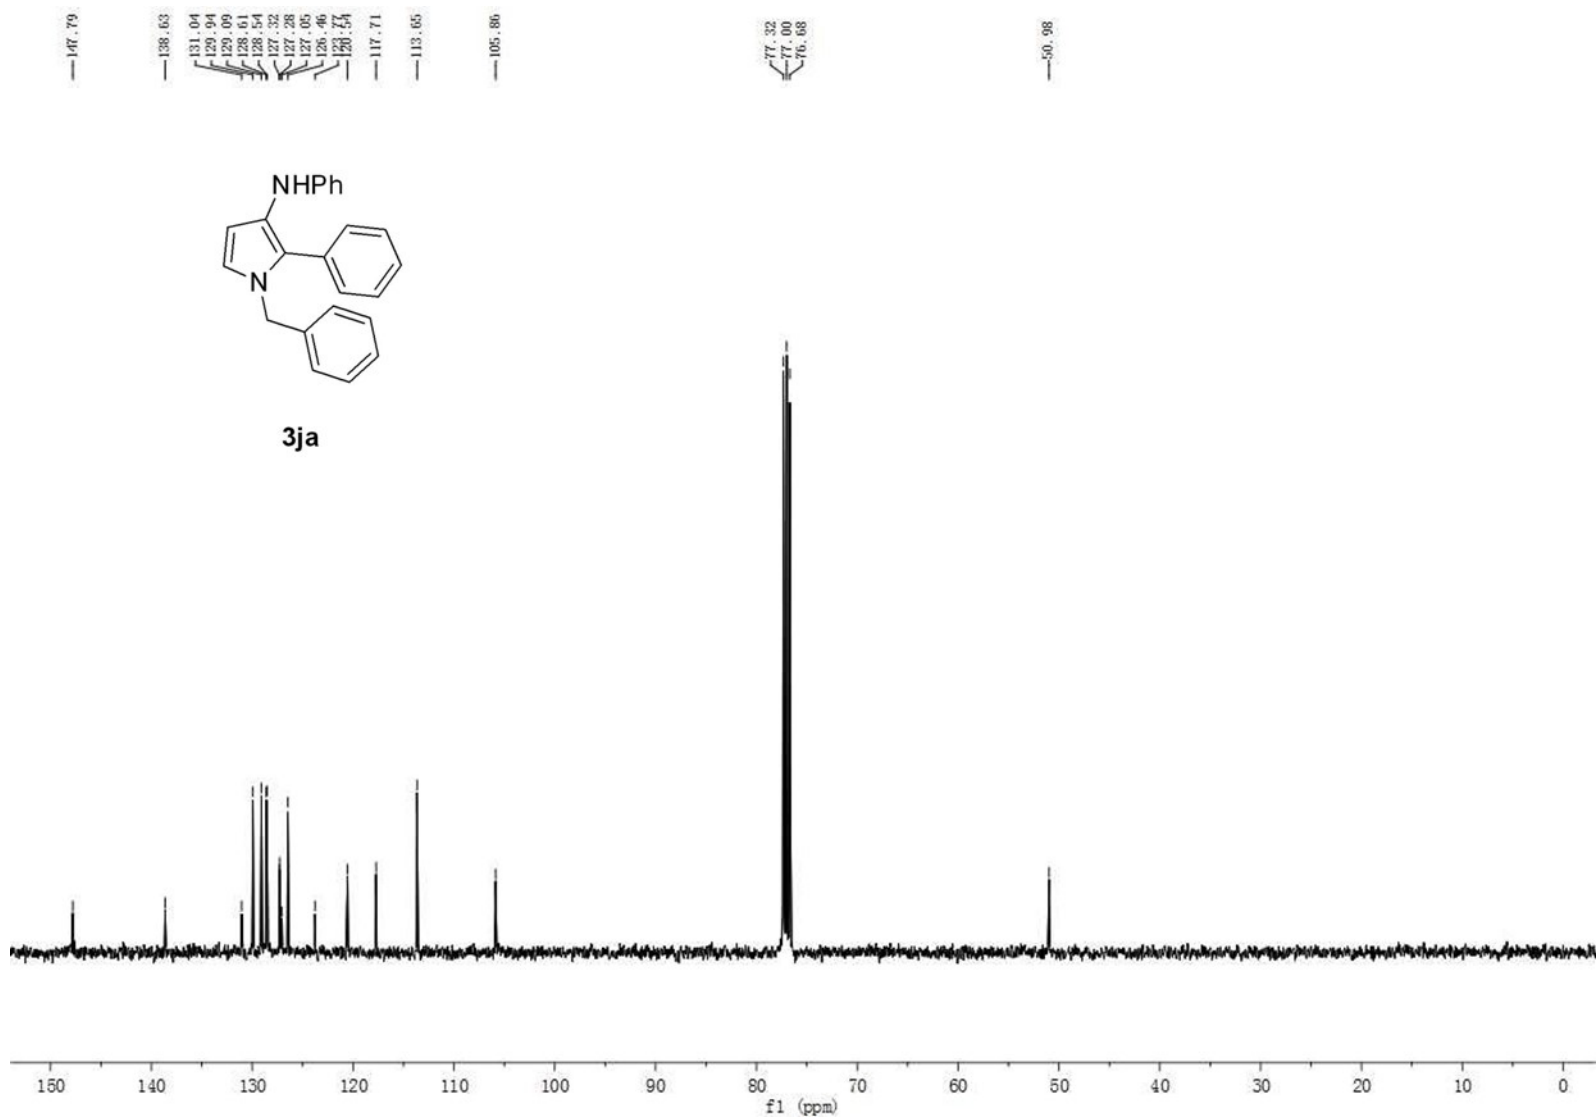

7.266  
7.255  
7.247  
7.101  
7.094  
7.080  
7.028  
7.008  
6.862  
6.854  
6.788  
6.679  
6.386  
6.378

5.898

2.334

2.147

0.000

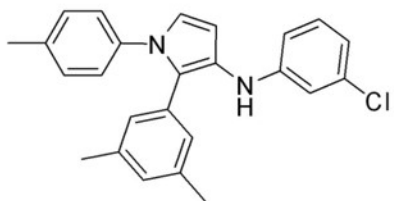

3ke

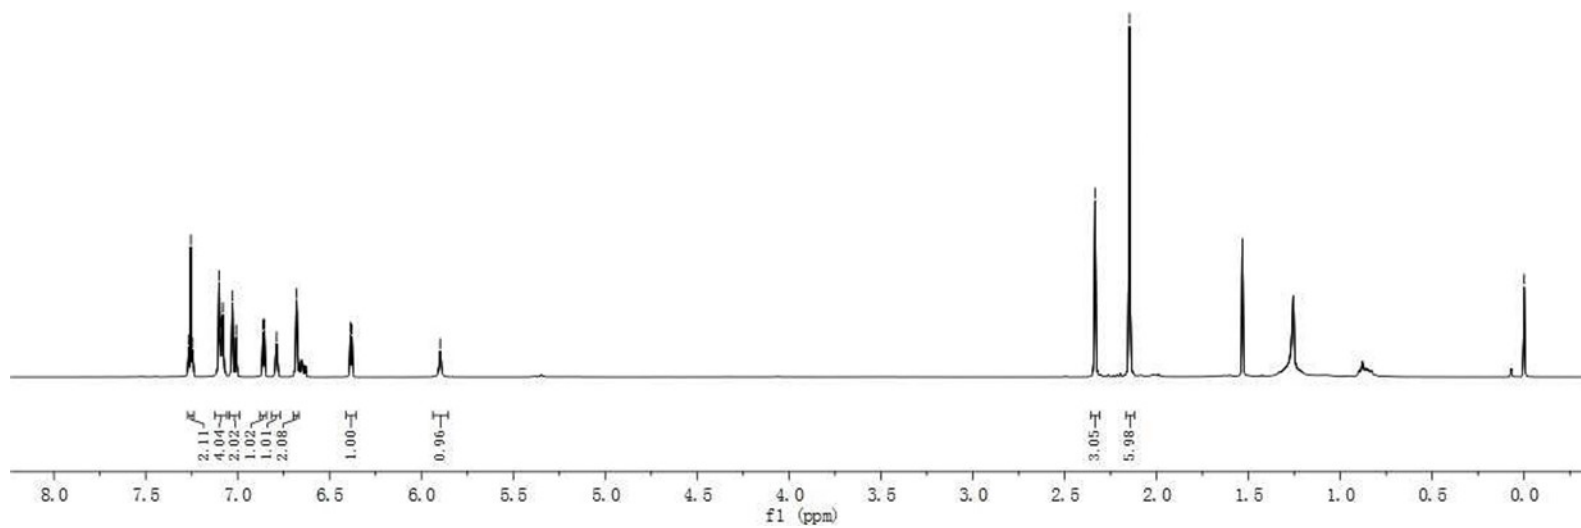

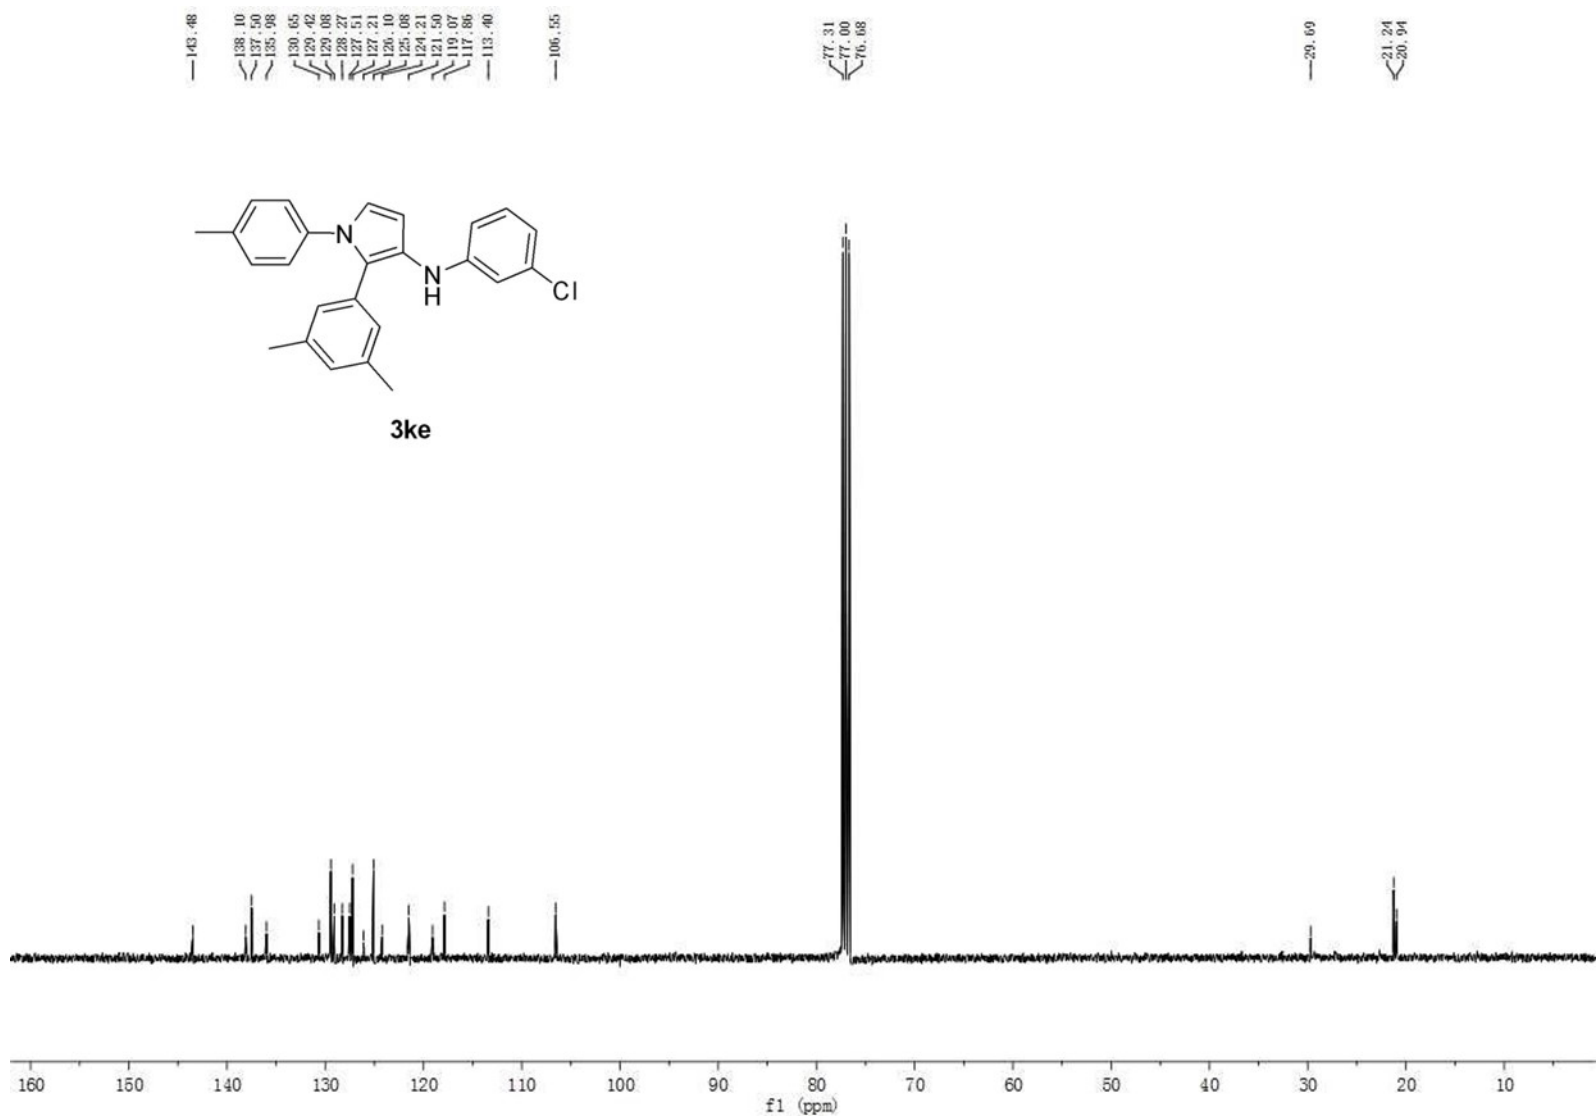

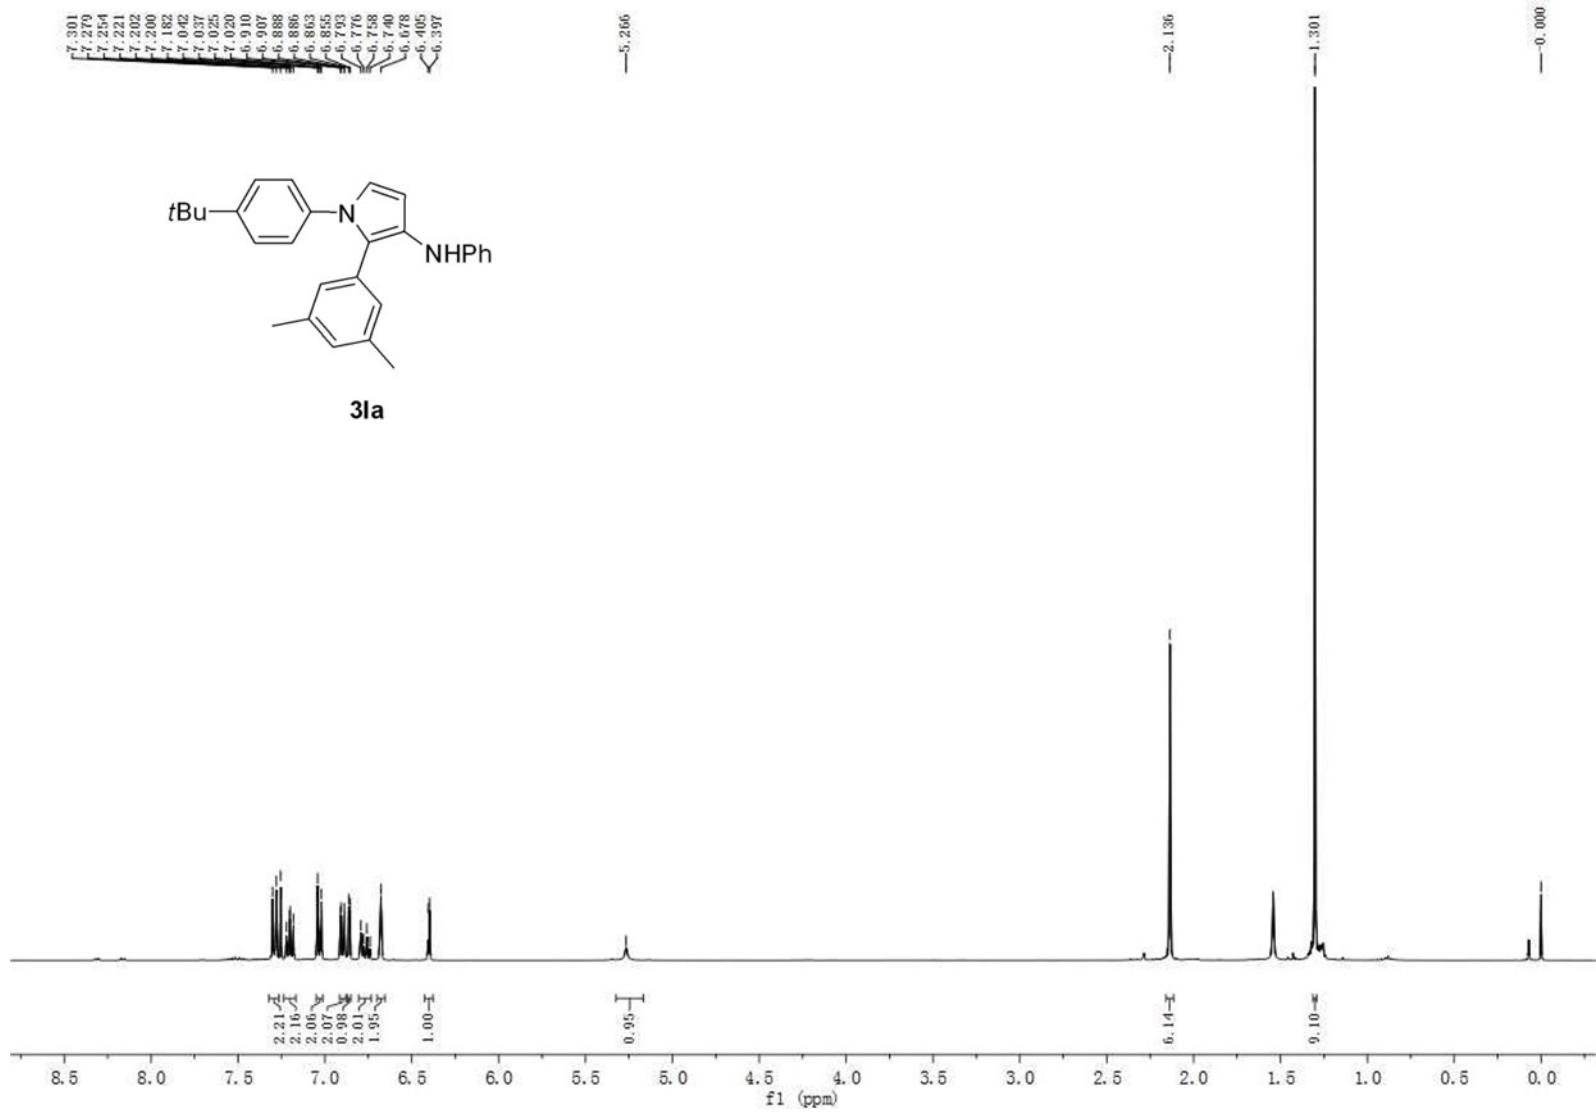

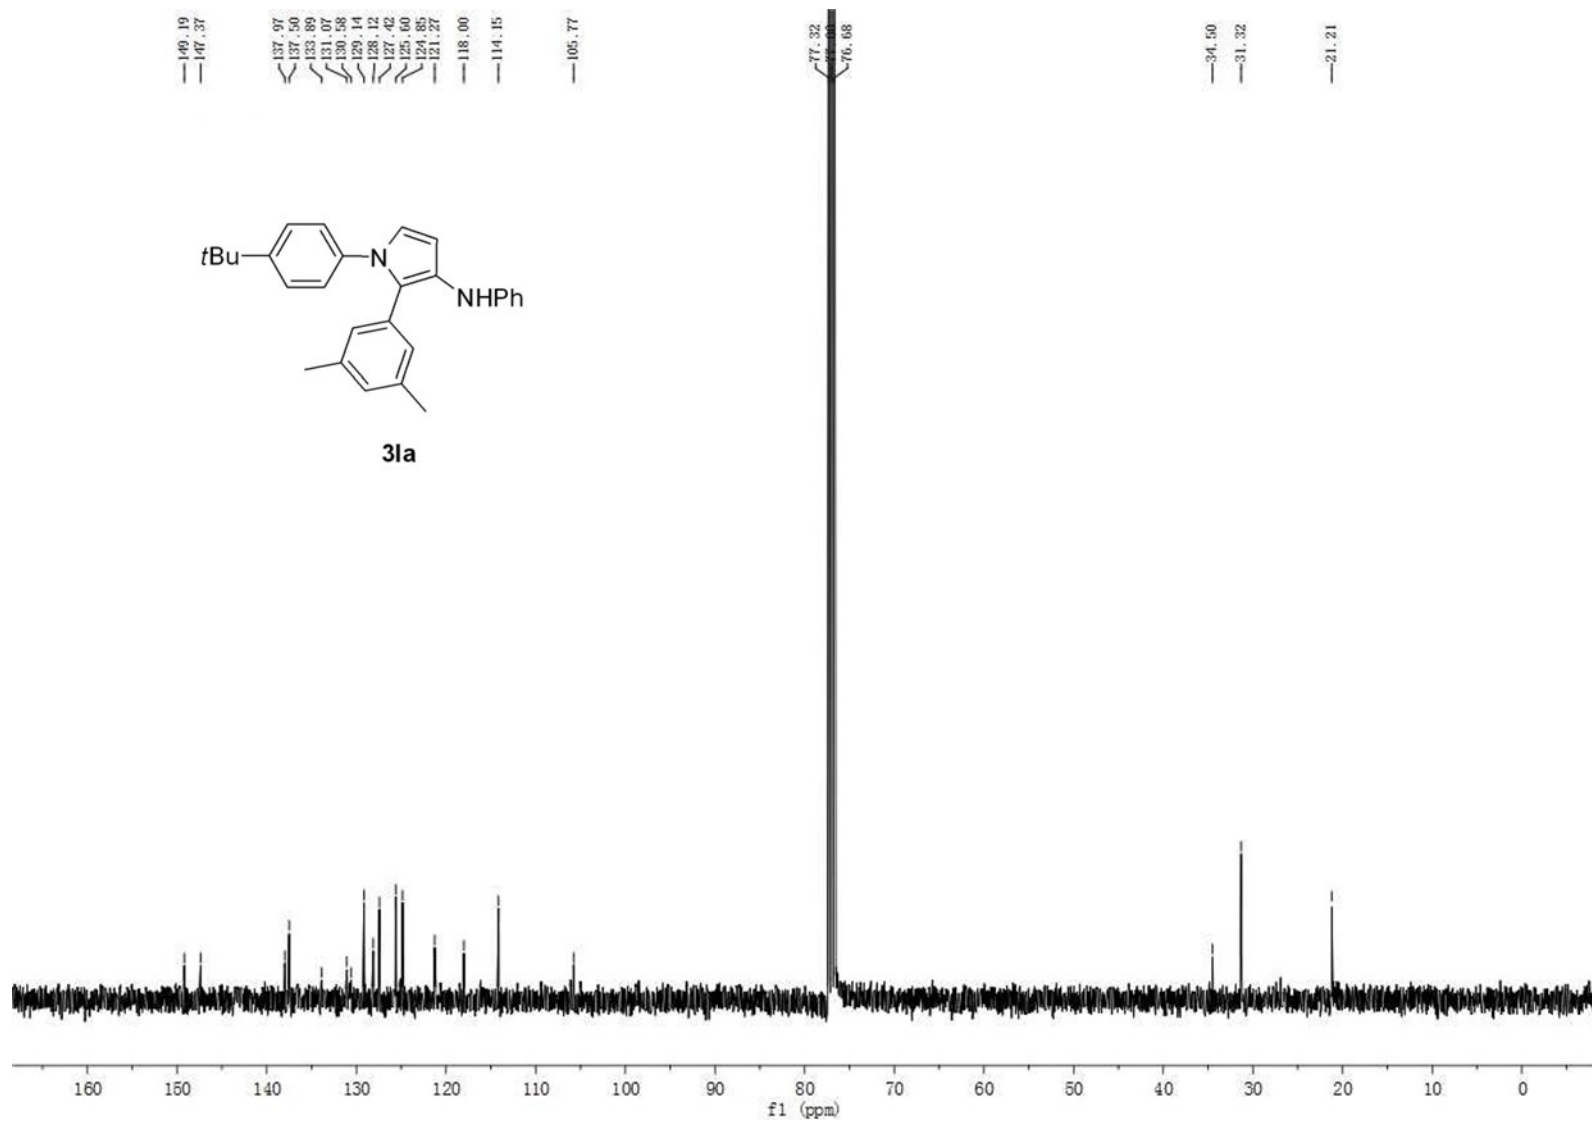



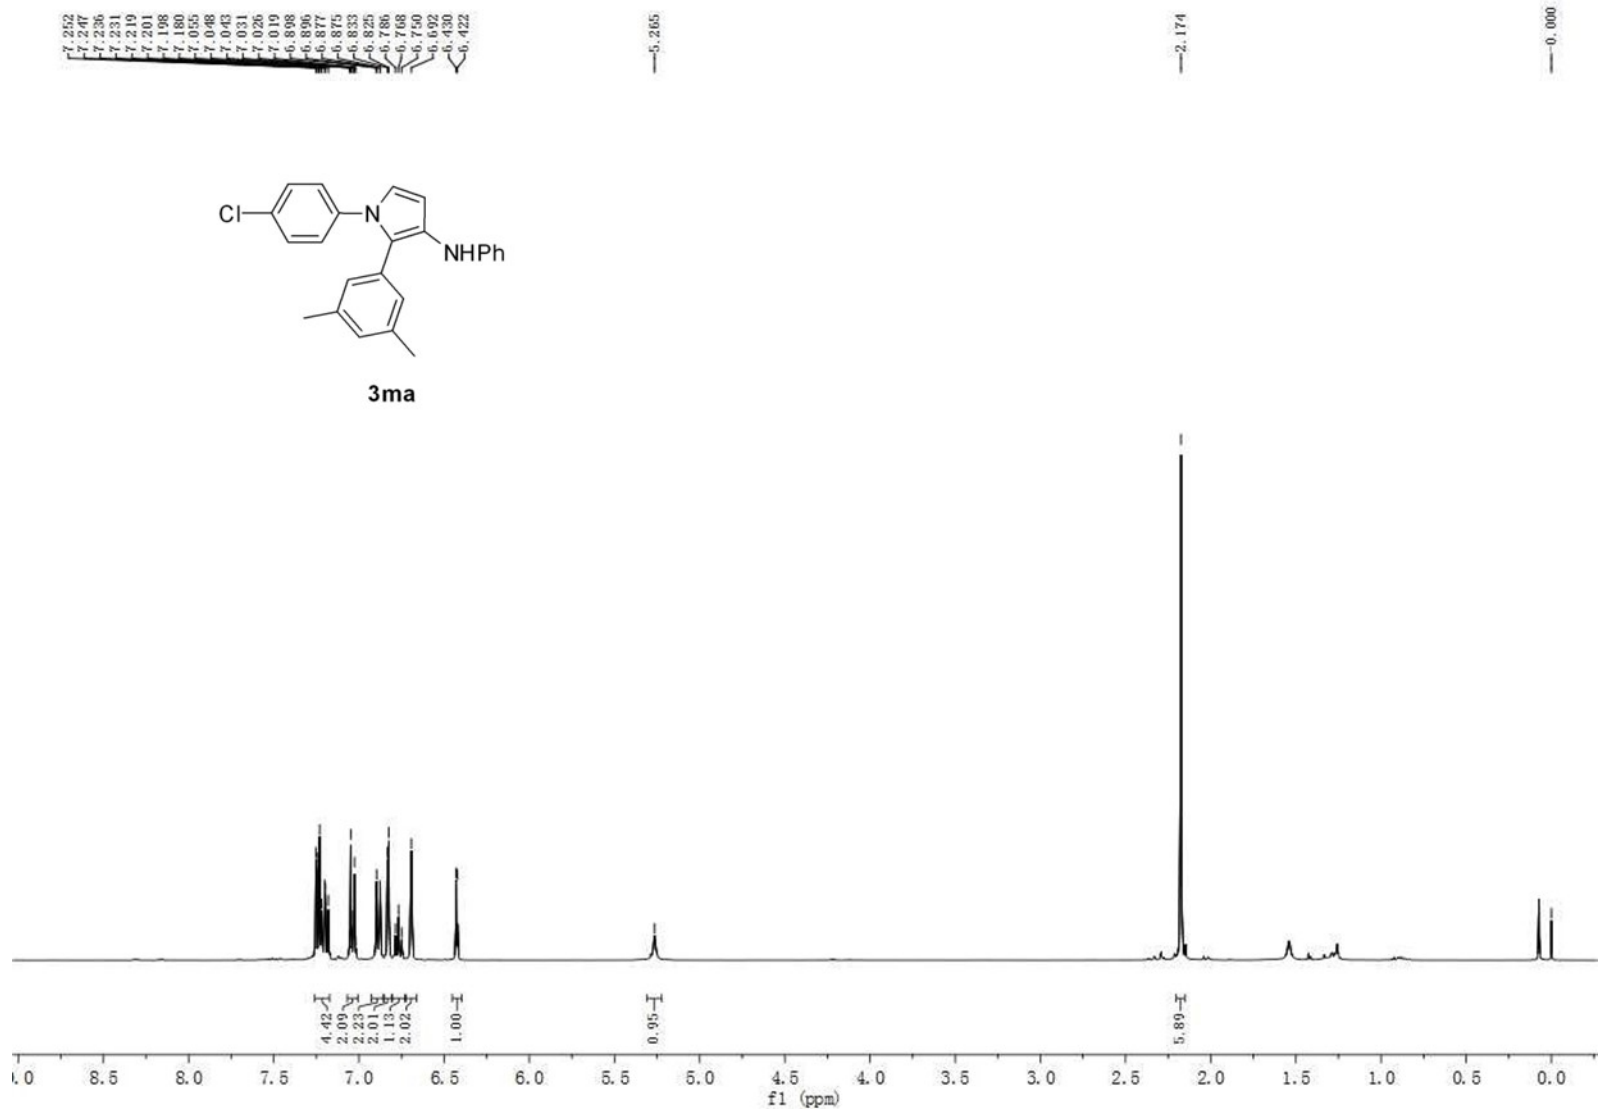

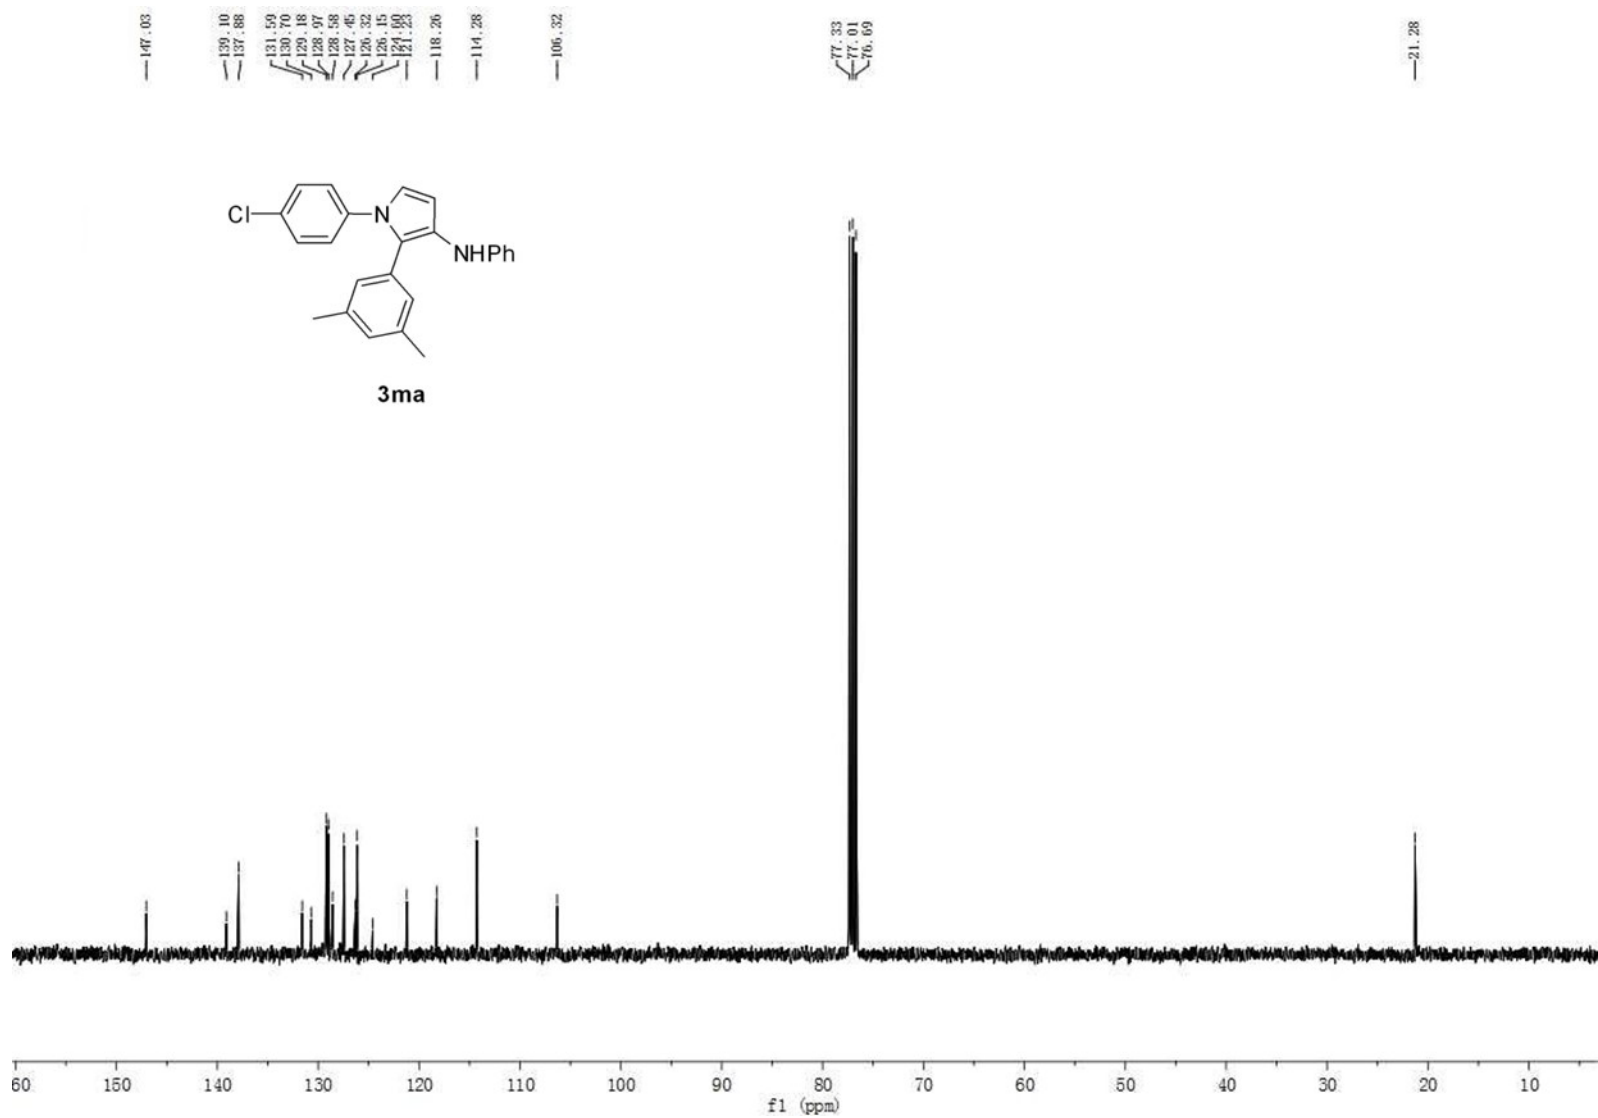

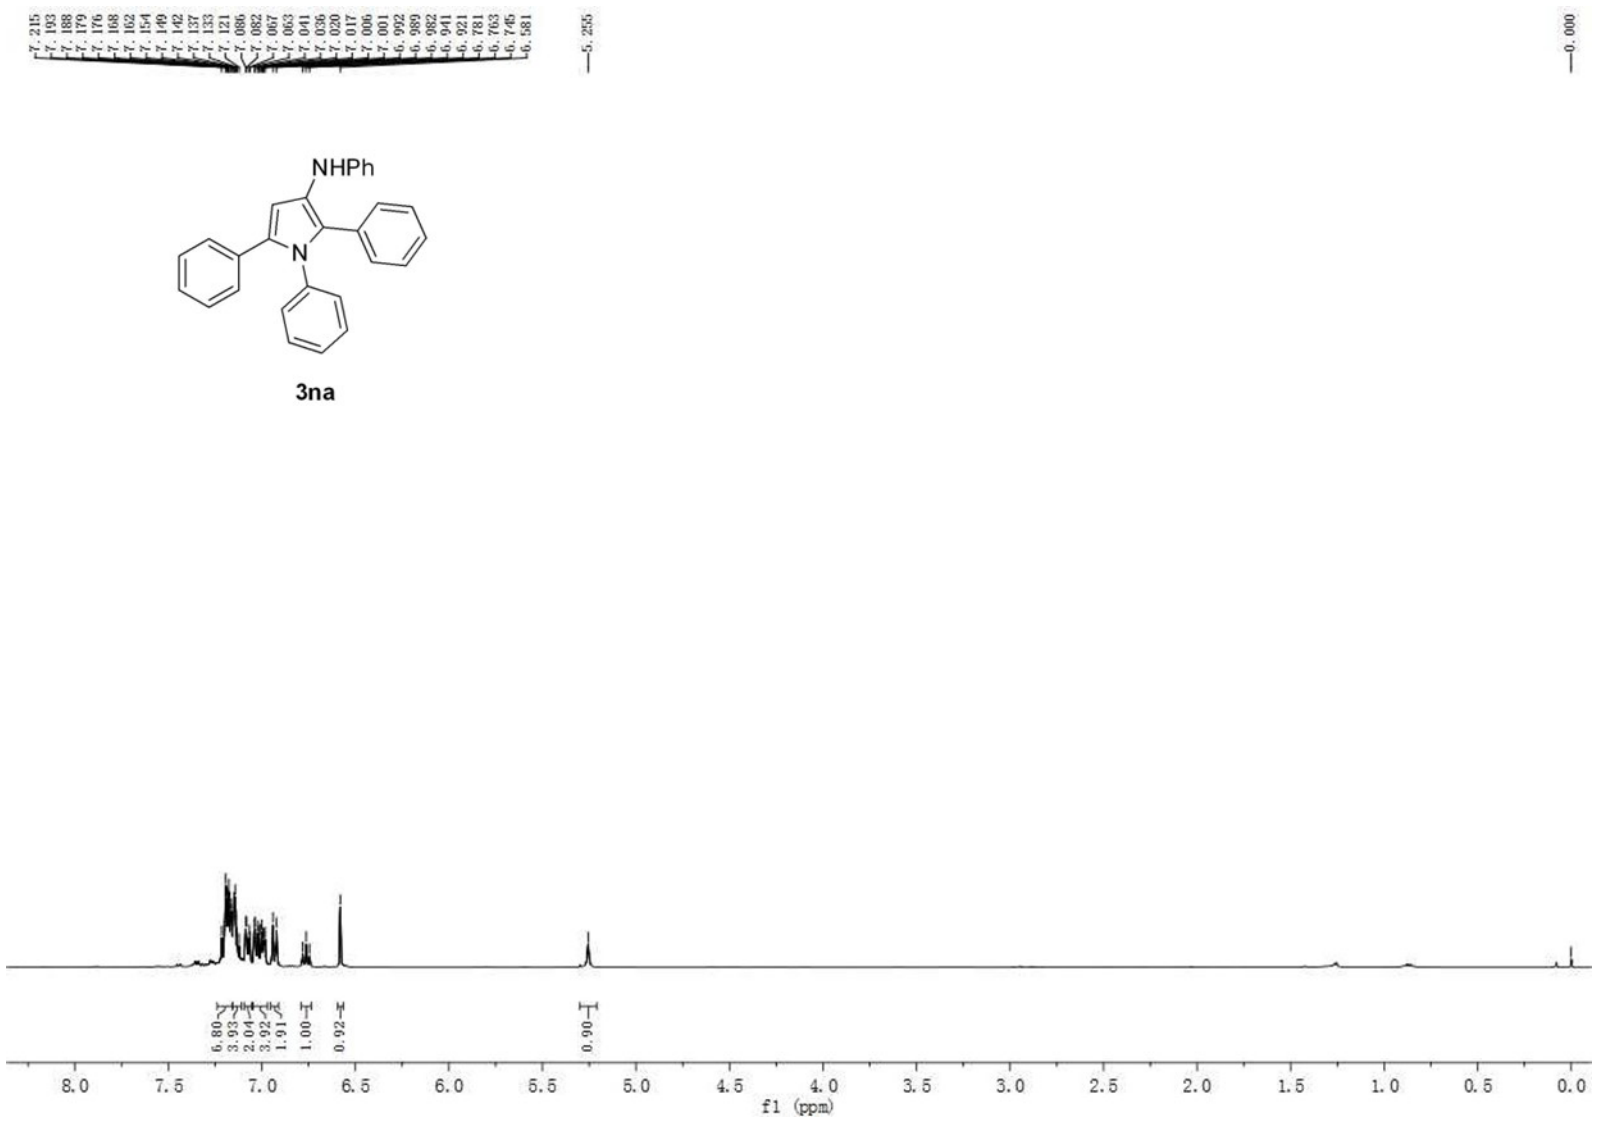

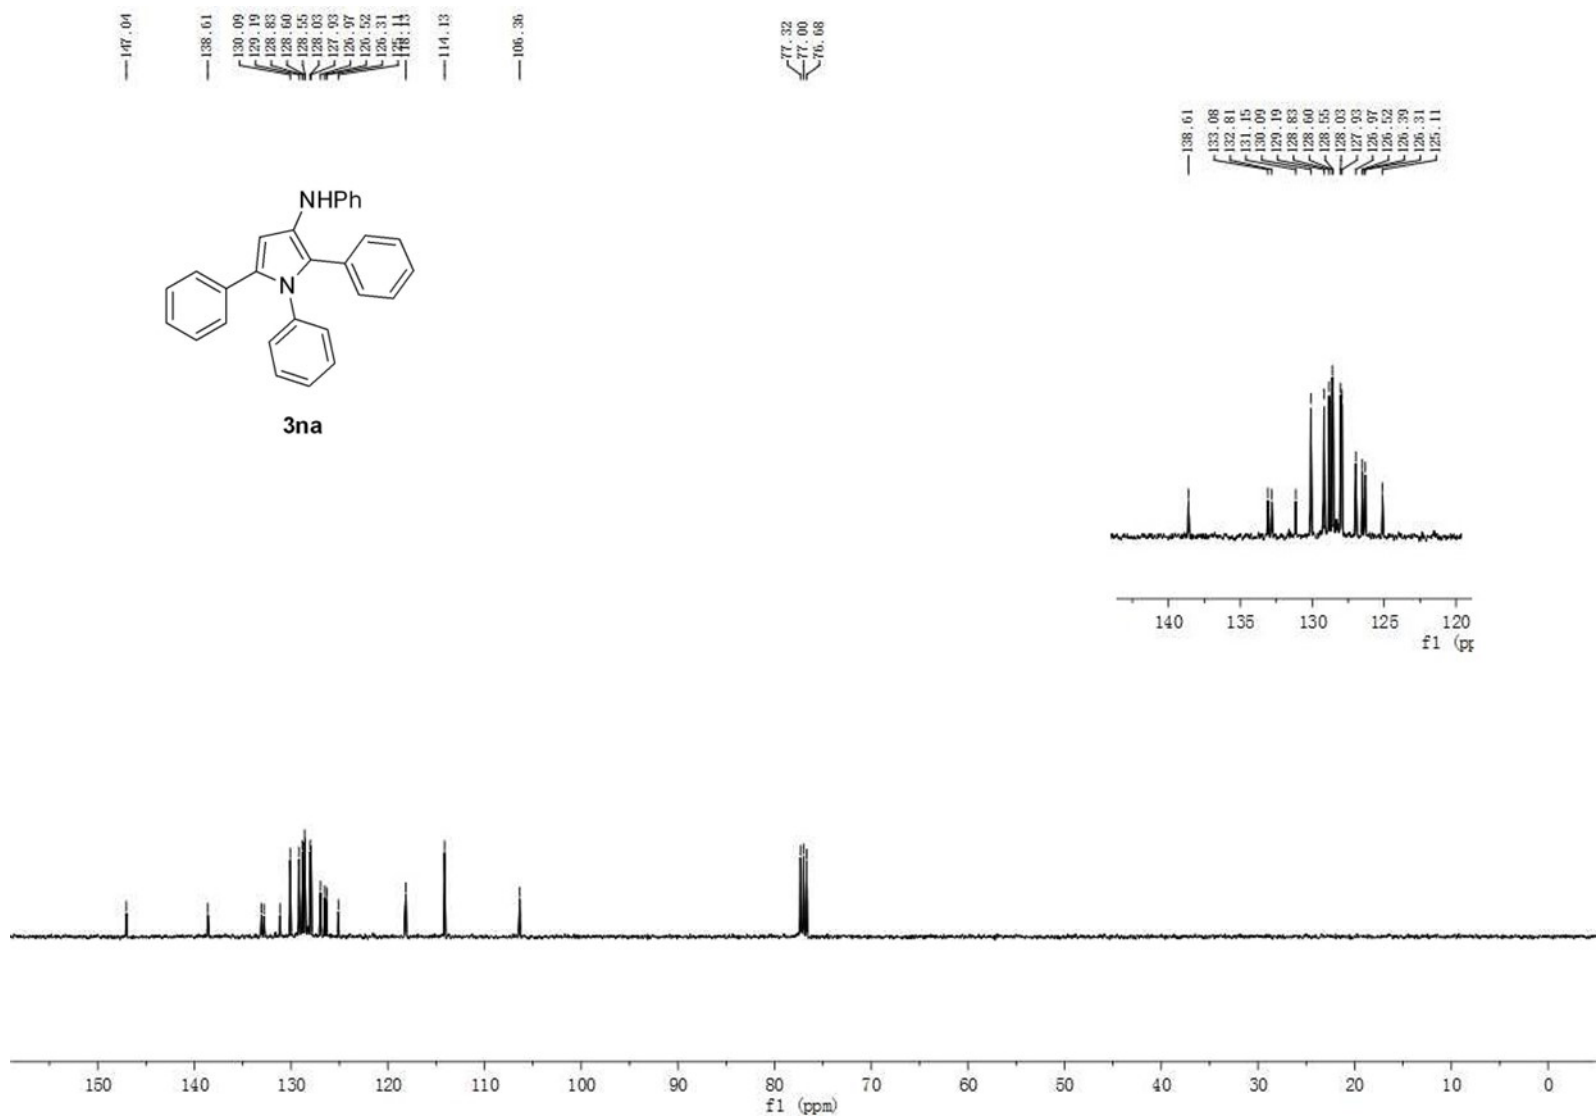

7.243  
7.219  
7.214  
7.201  
7.181  
7.170  
7.147  
7.125  
7.037  
7.017  
6.998  
6.977  
6.931  
6.912  
6.790  
6.772  
6.754  
6.564

5.243

0.000

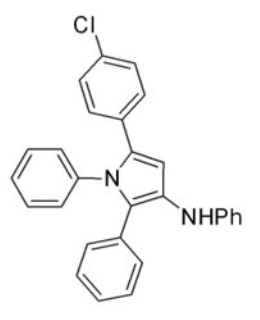

3a

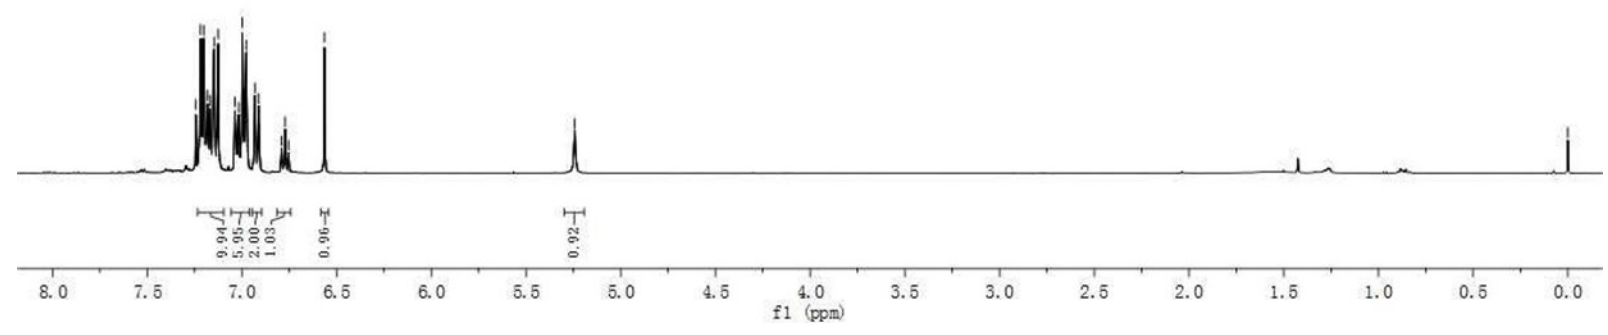

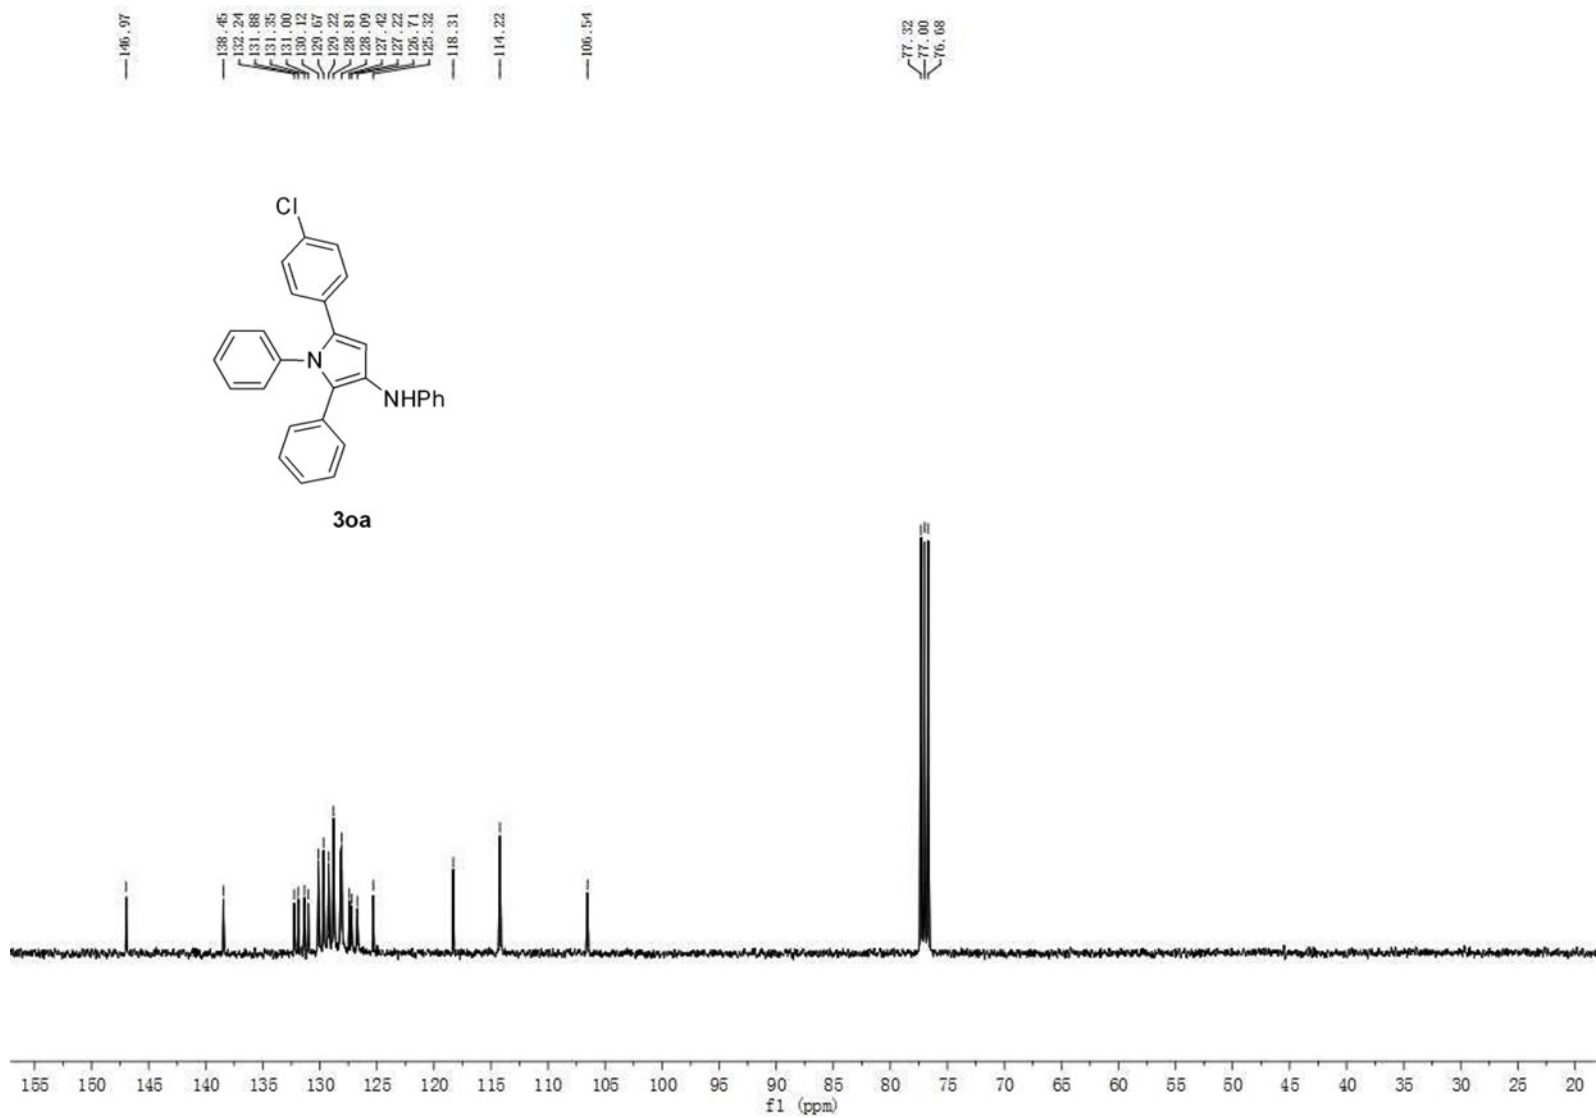

7.245  
7.218  
7.206  
7.197  
7.189  
7.179  
7.166  
7.149  
7.133  
7.114  
7.102  
7.085  
7.031  
6.999  
6.987  
6.982  
6.949  
6.949  
6.779  
6.760  
6.742  
6.408  
6.400

—5.232

—2.284

—0.004

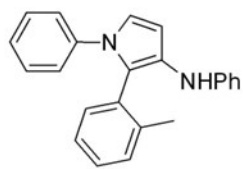

3pa

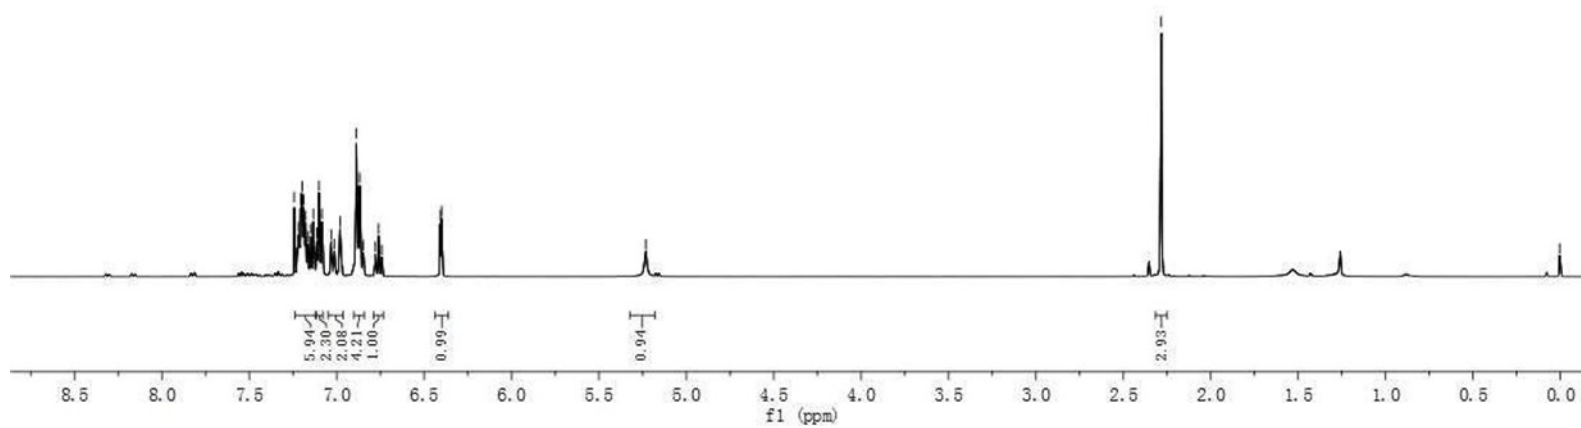

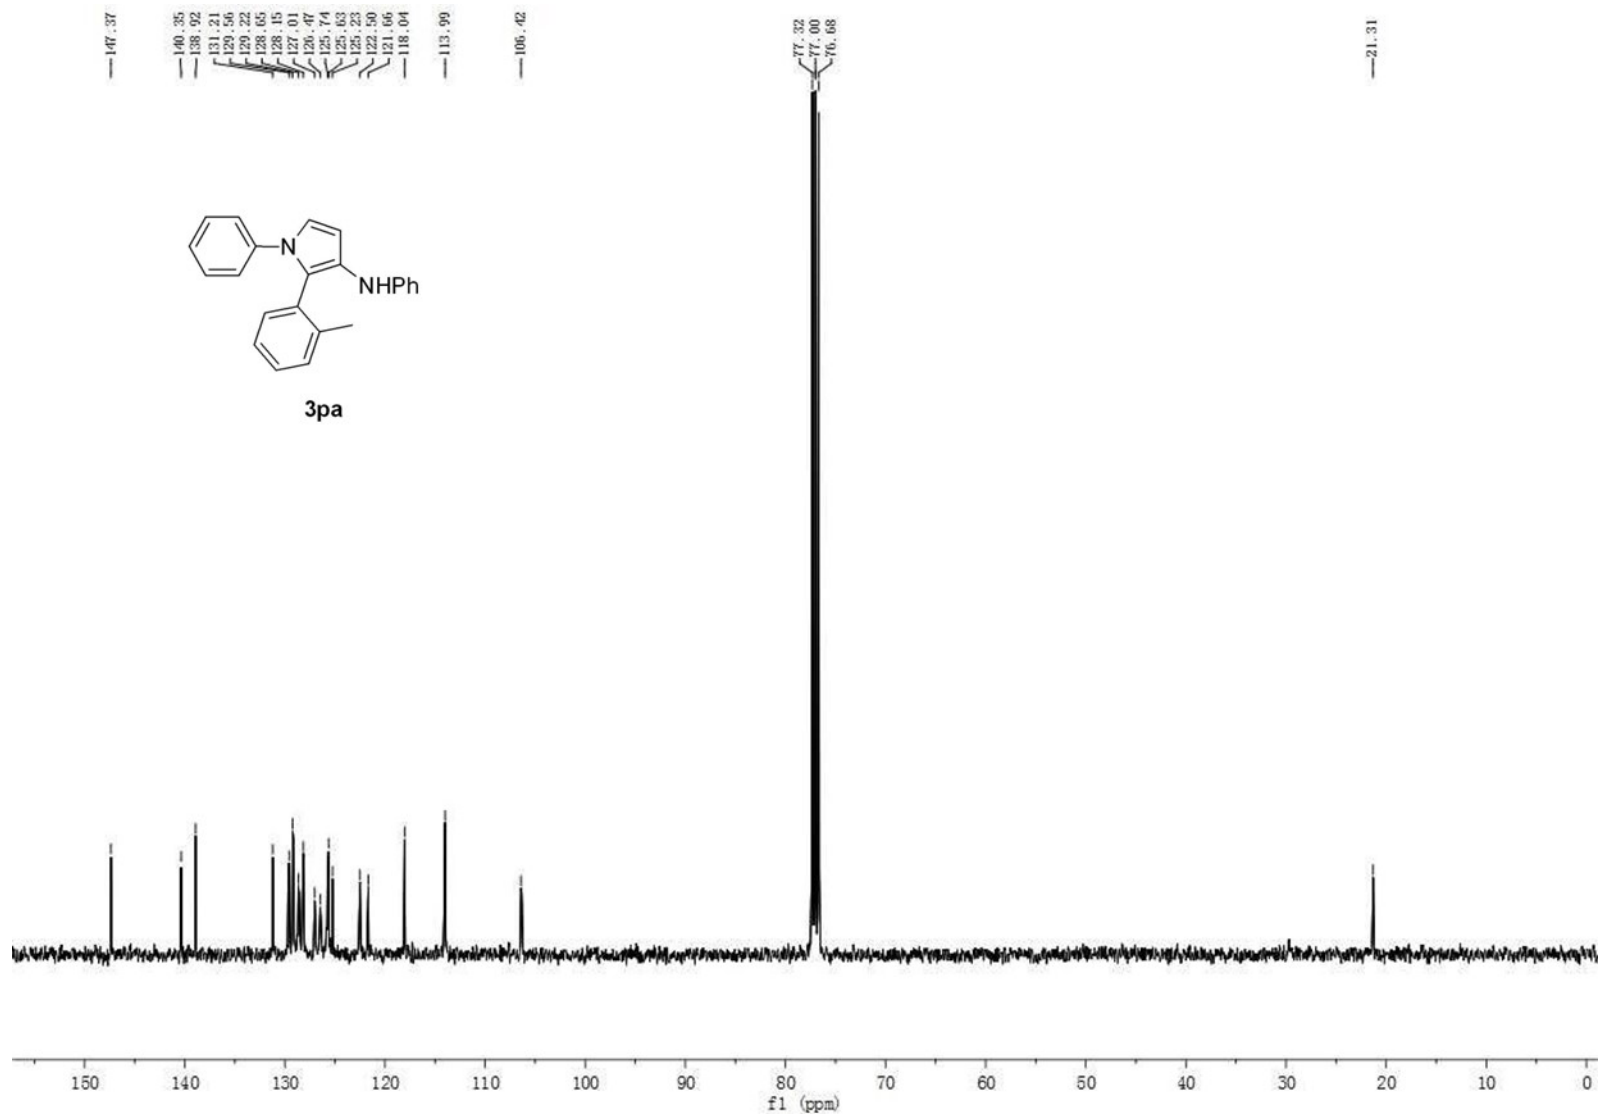

S100



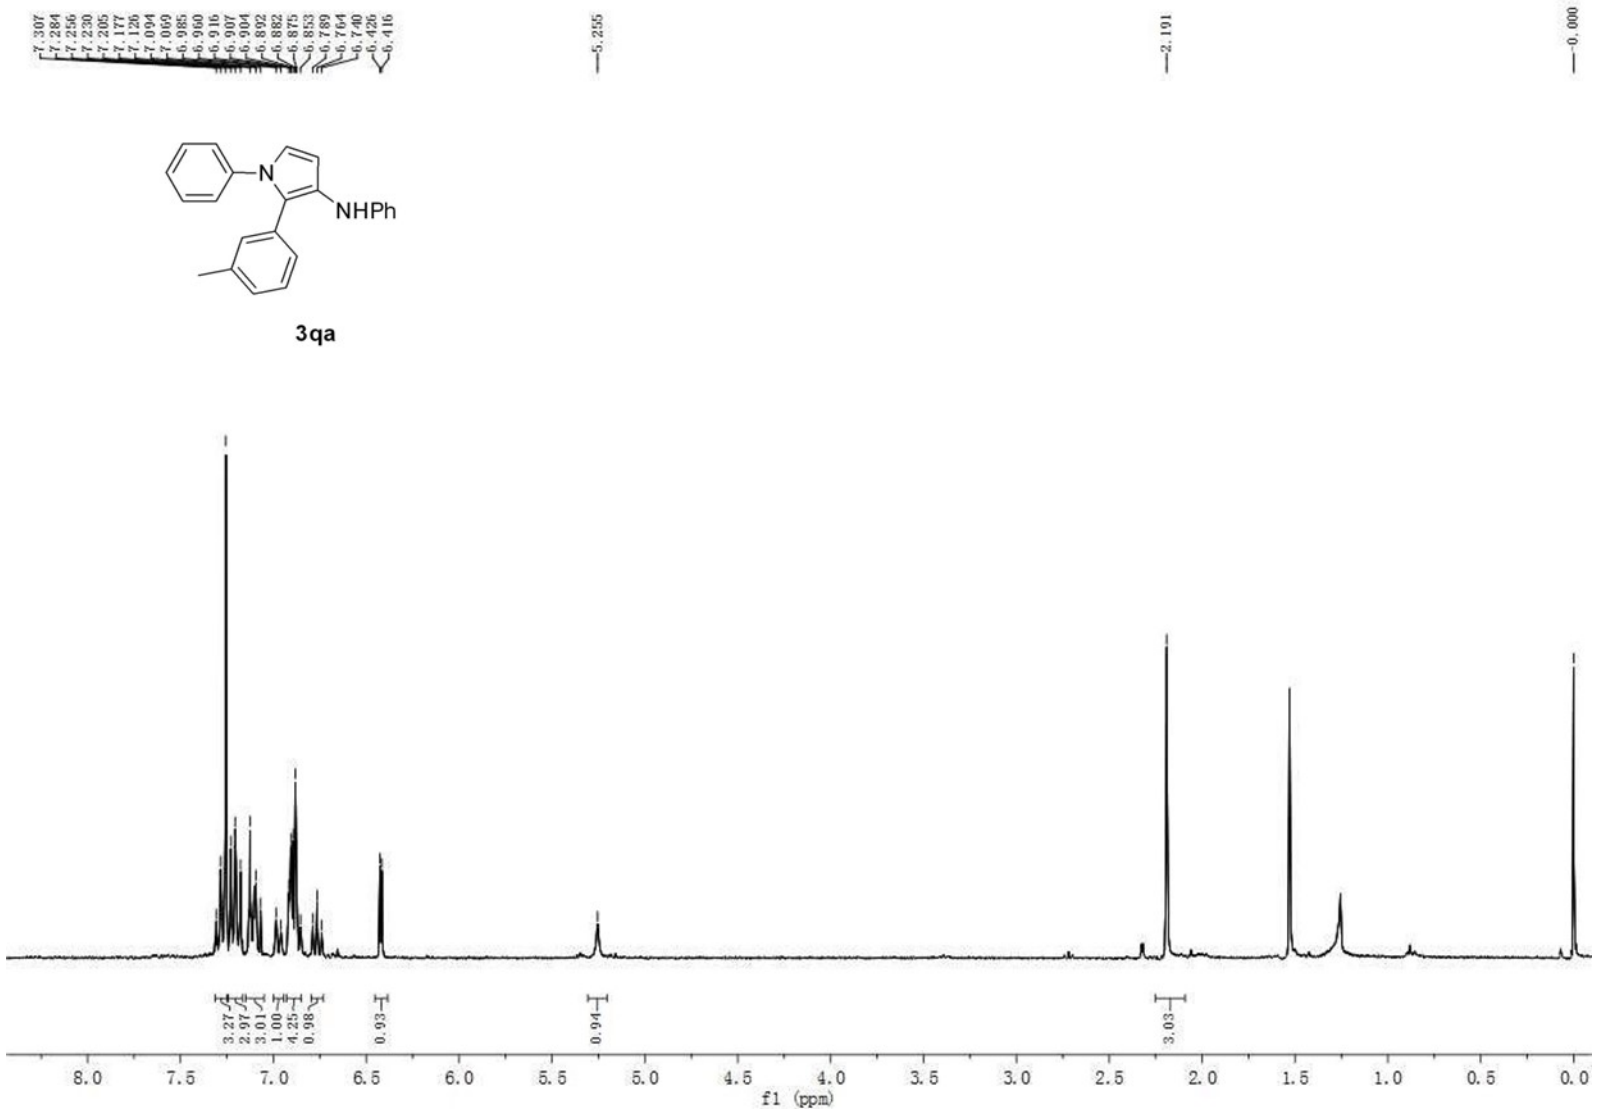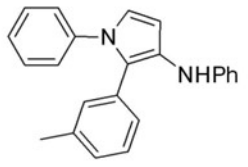

3qa

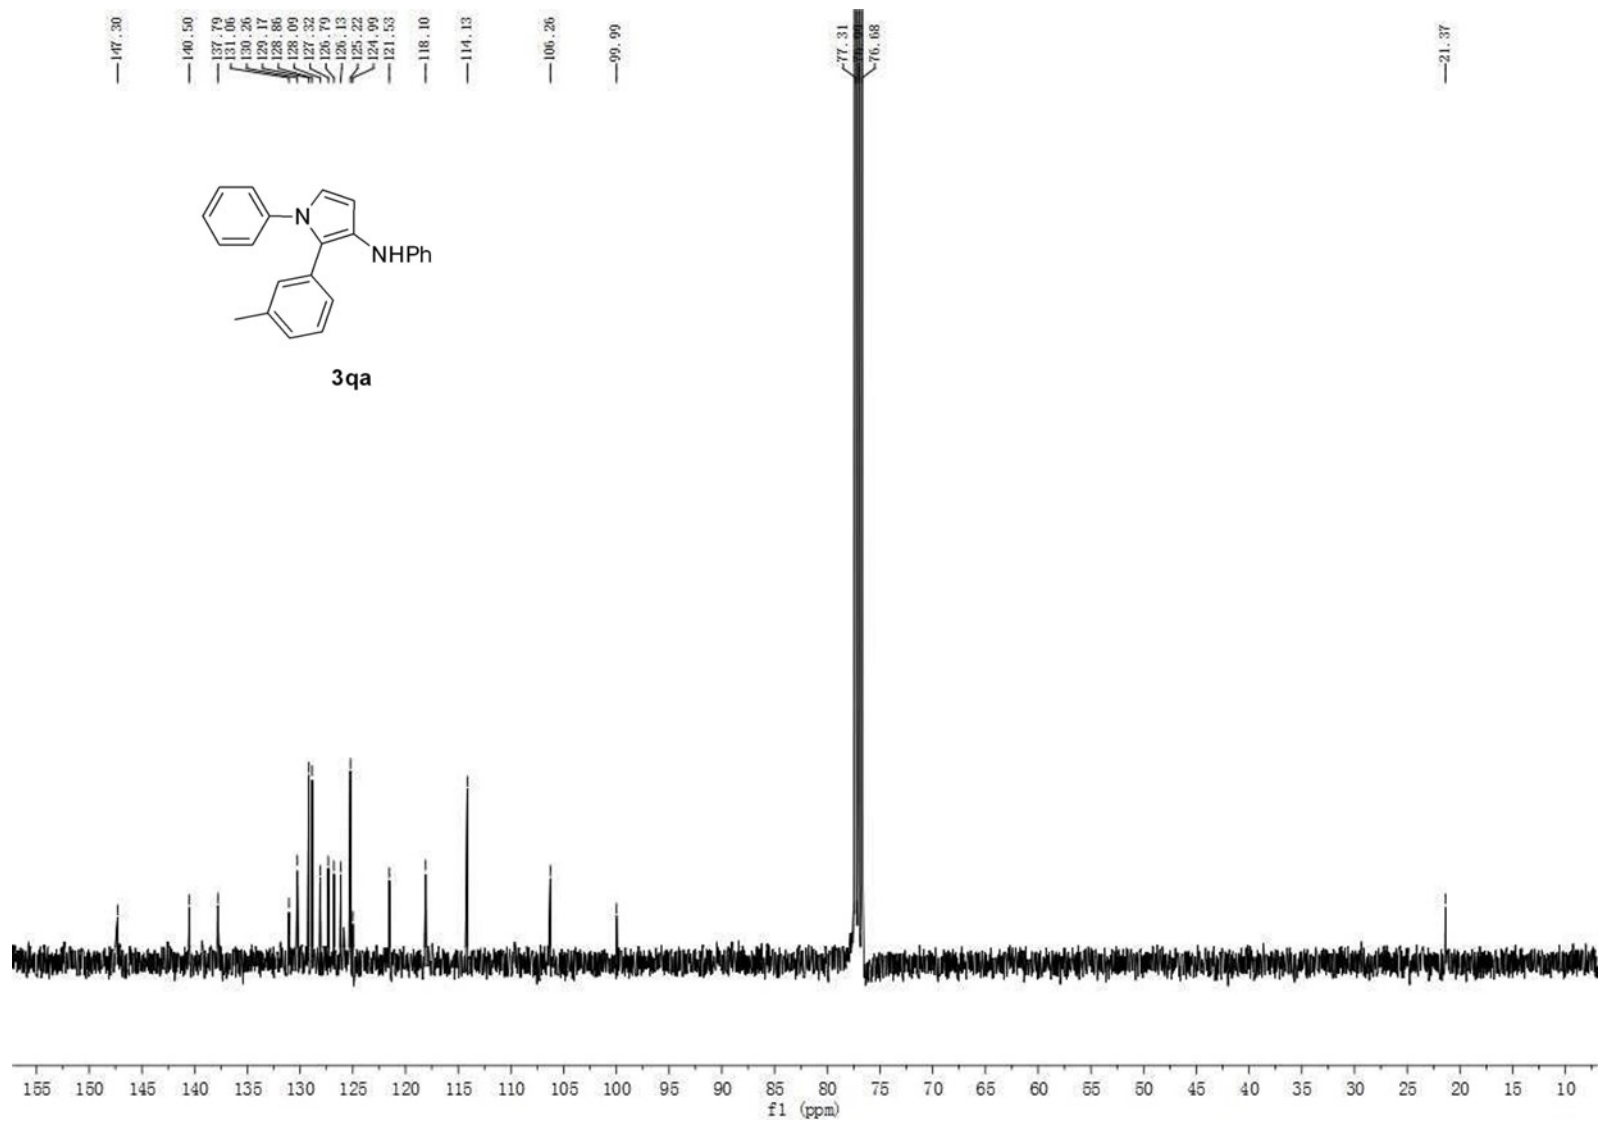

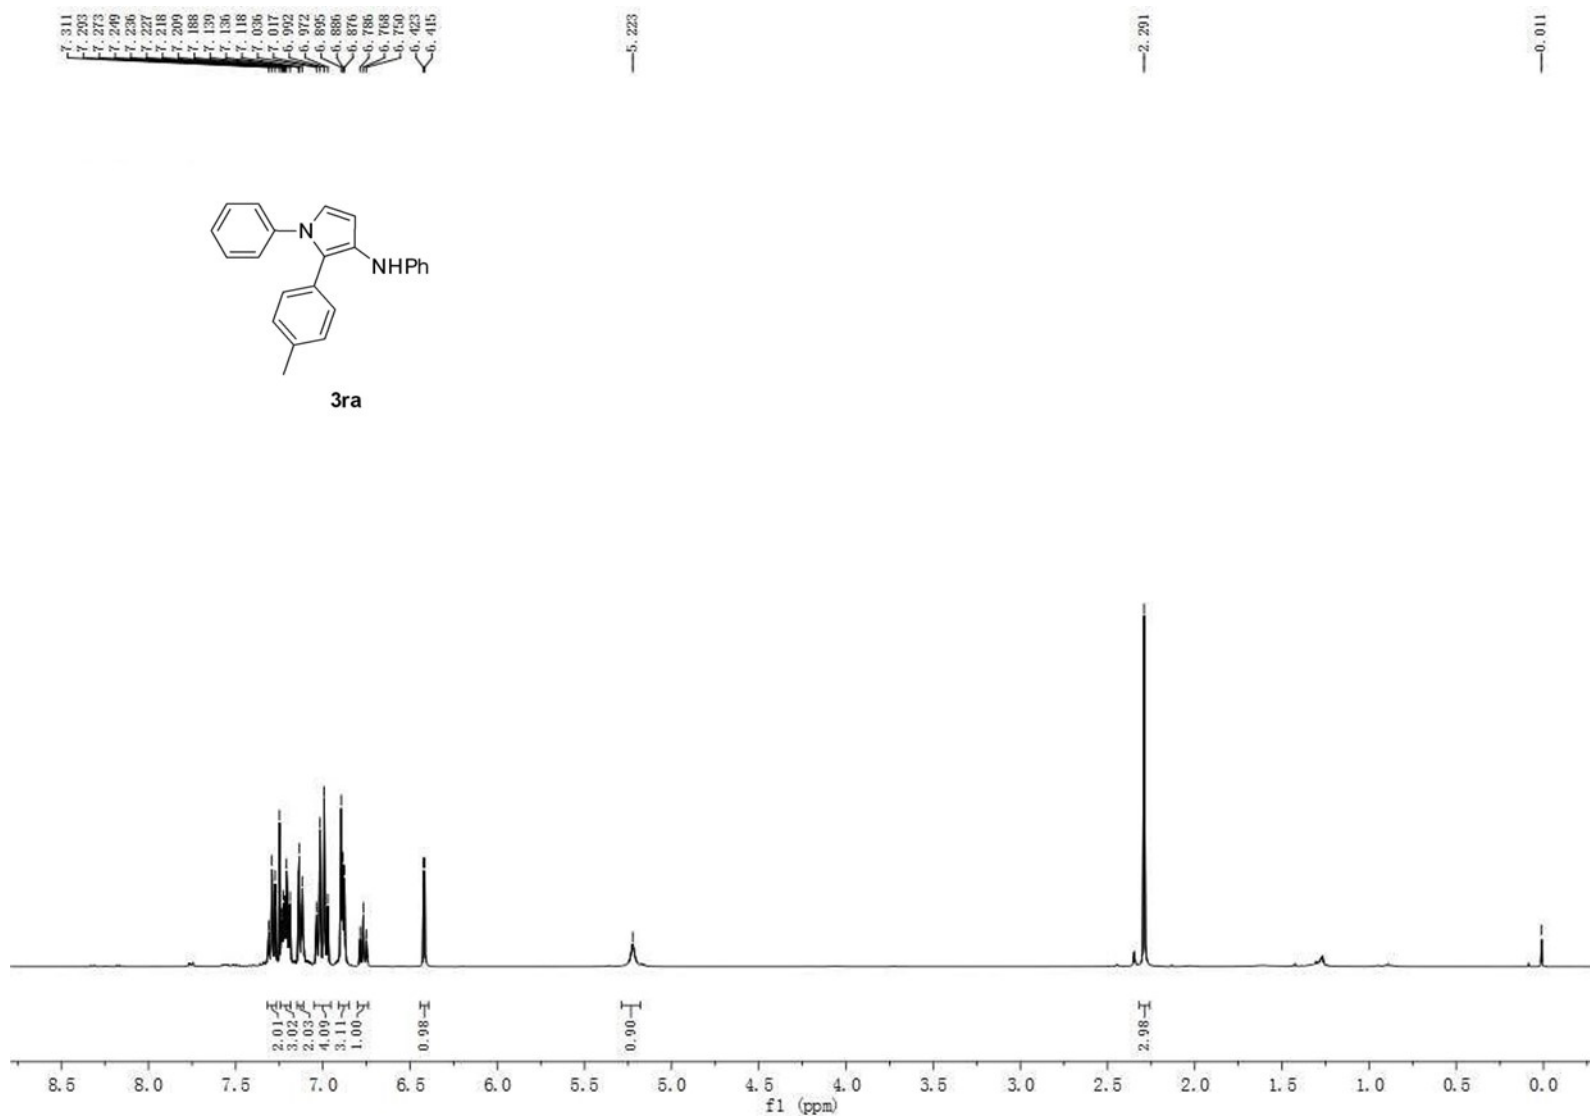

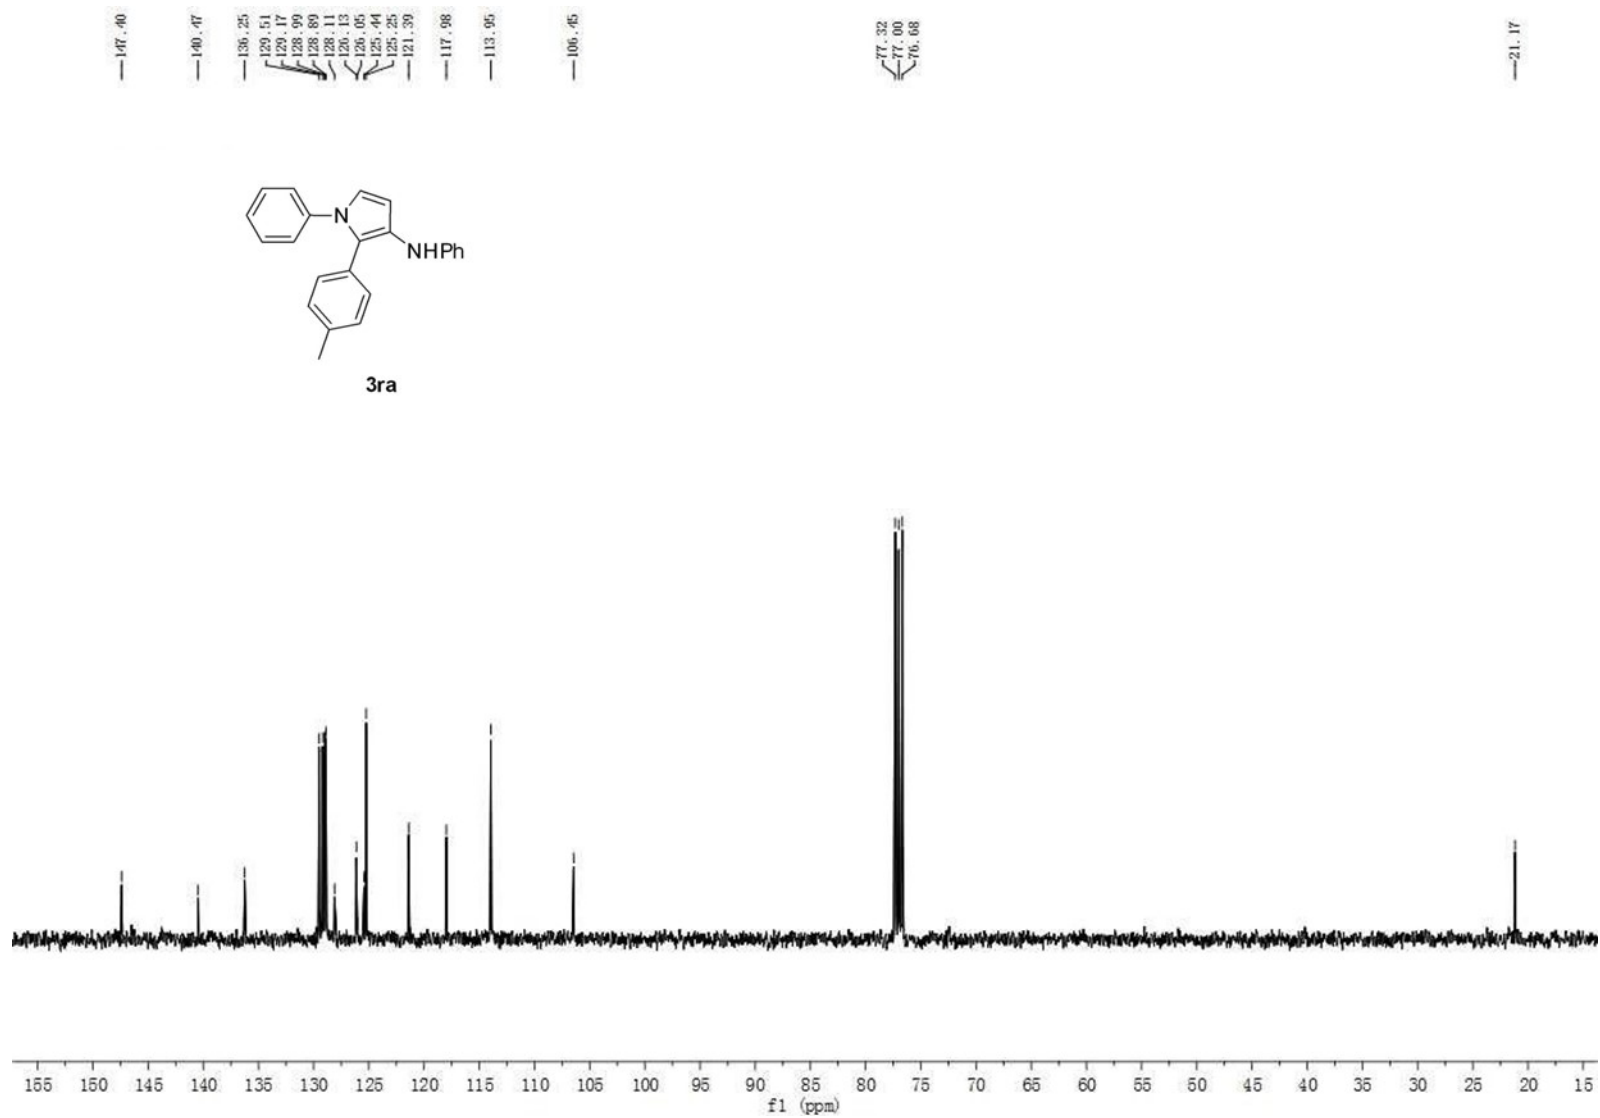

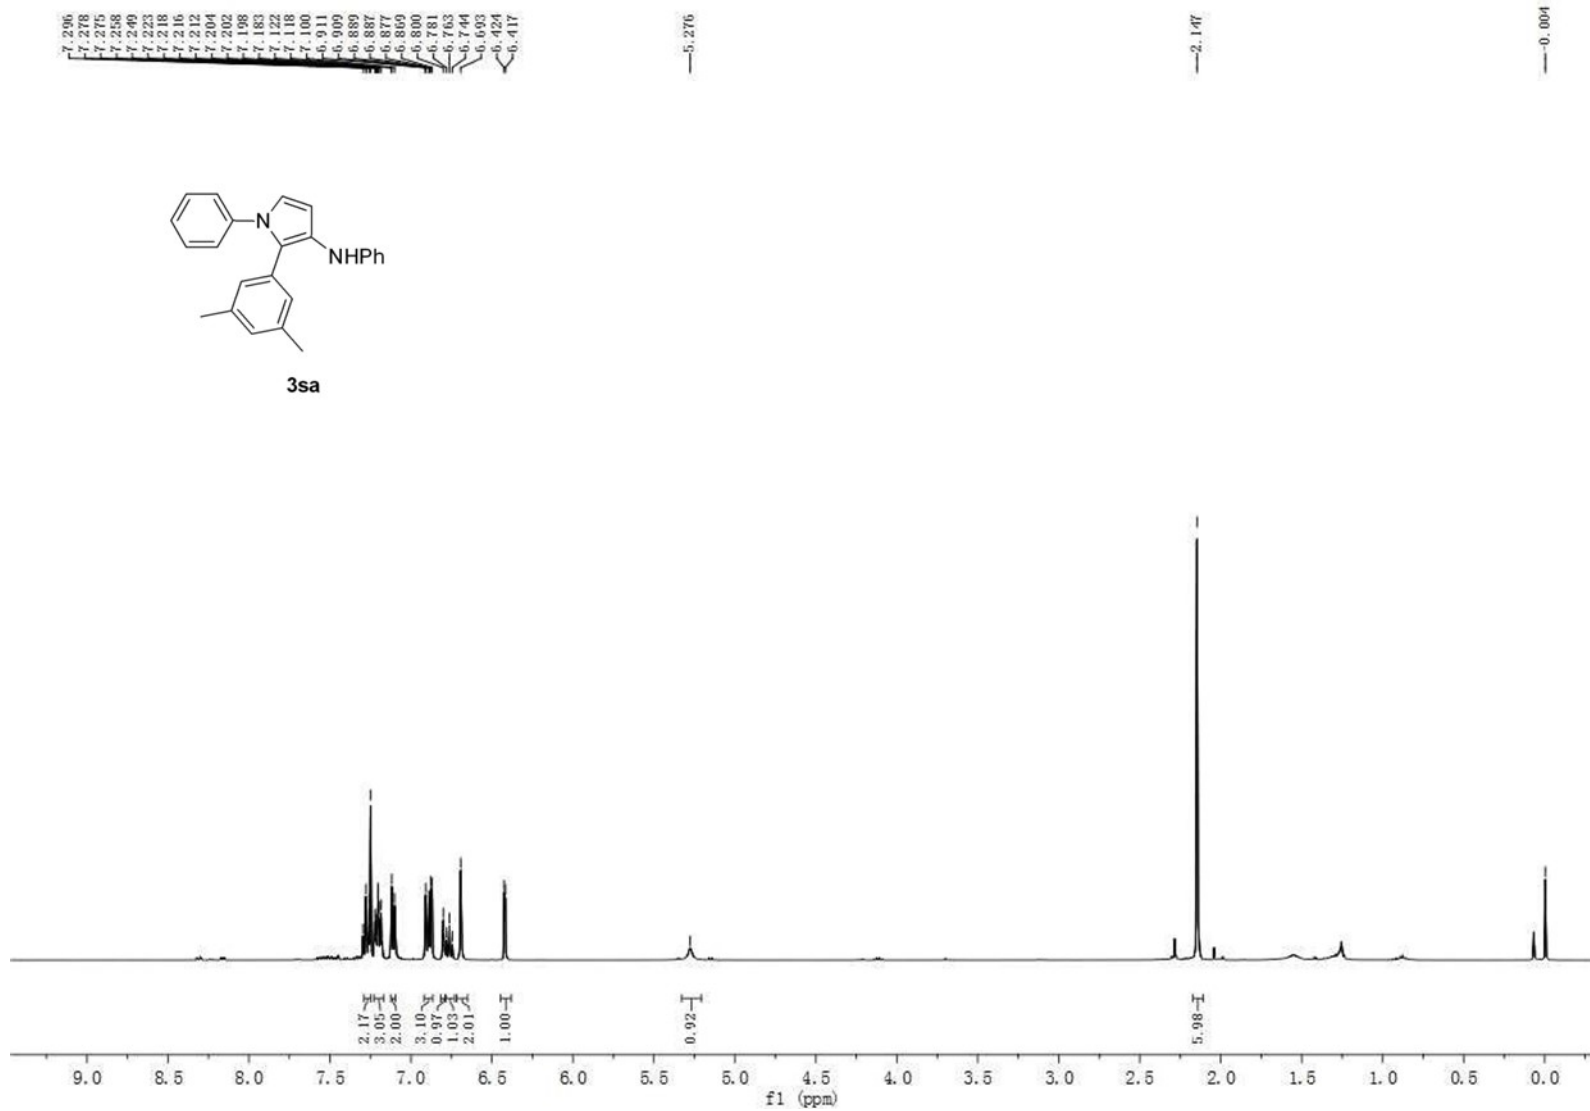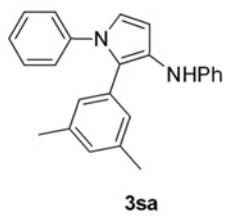

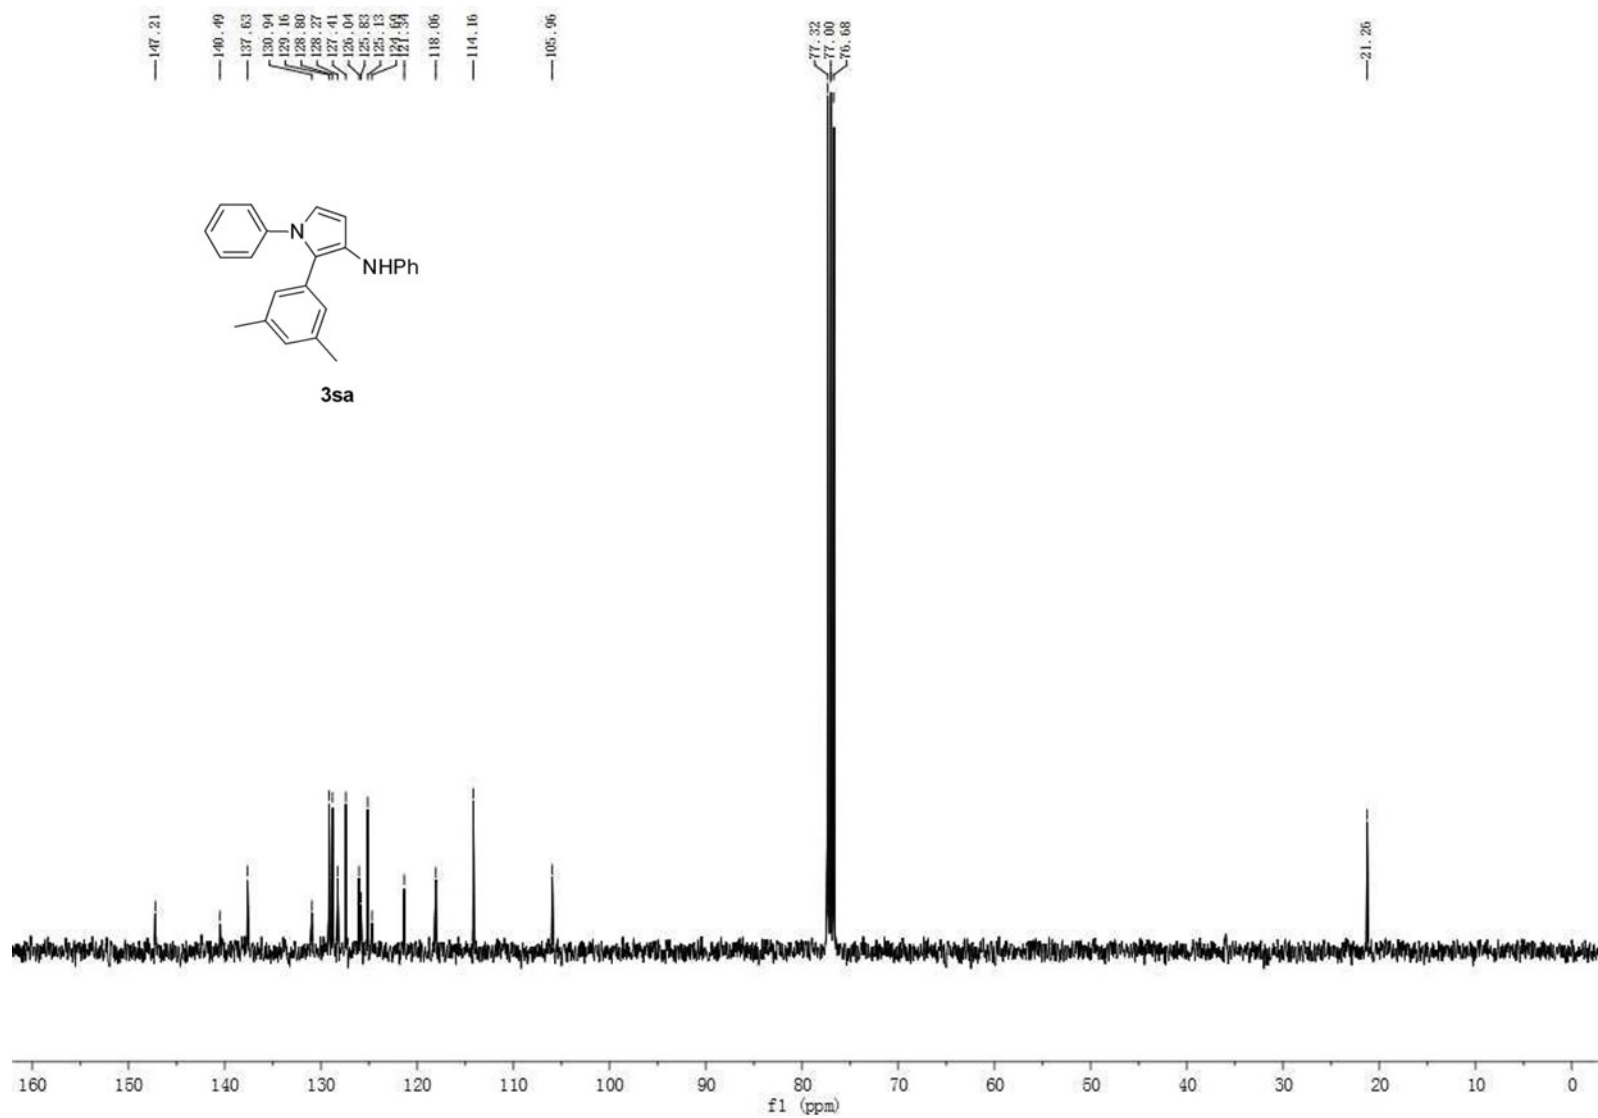

S106

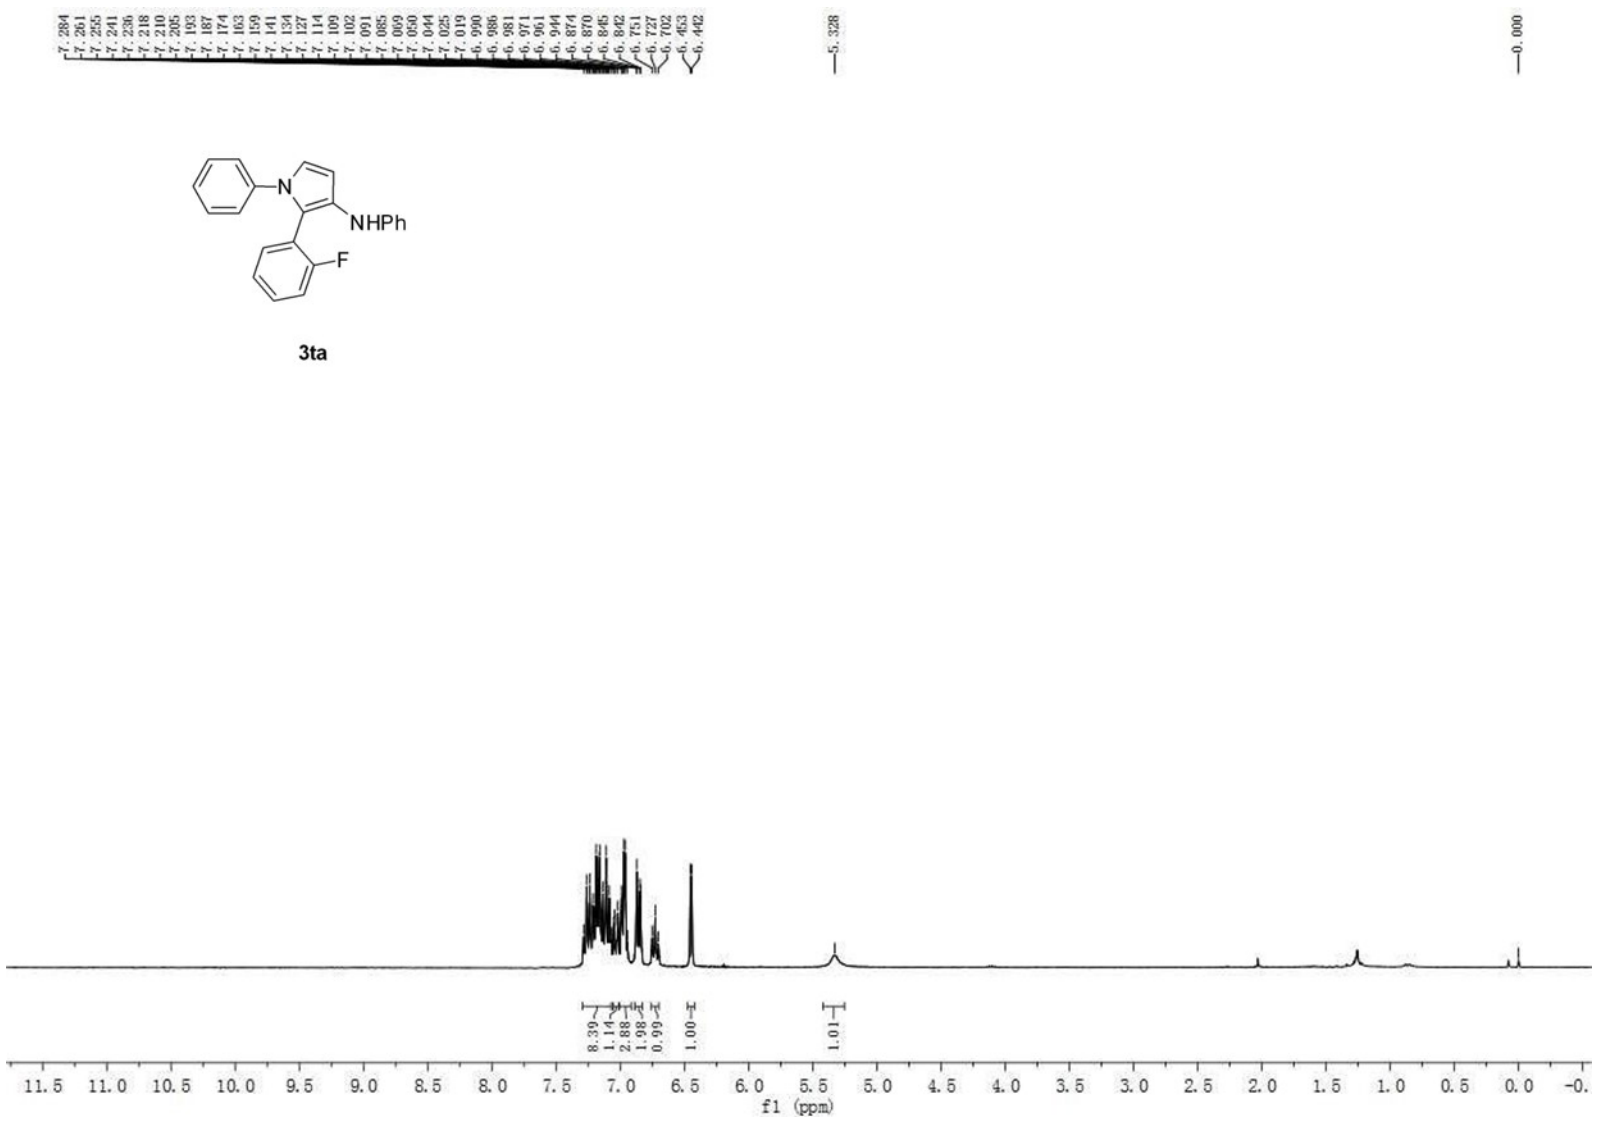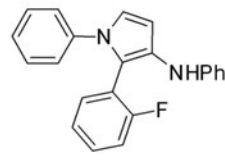

3ta

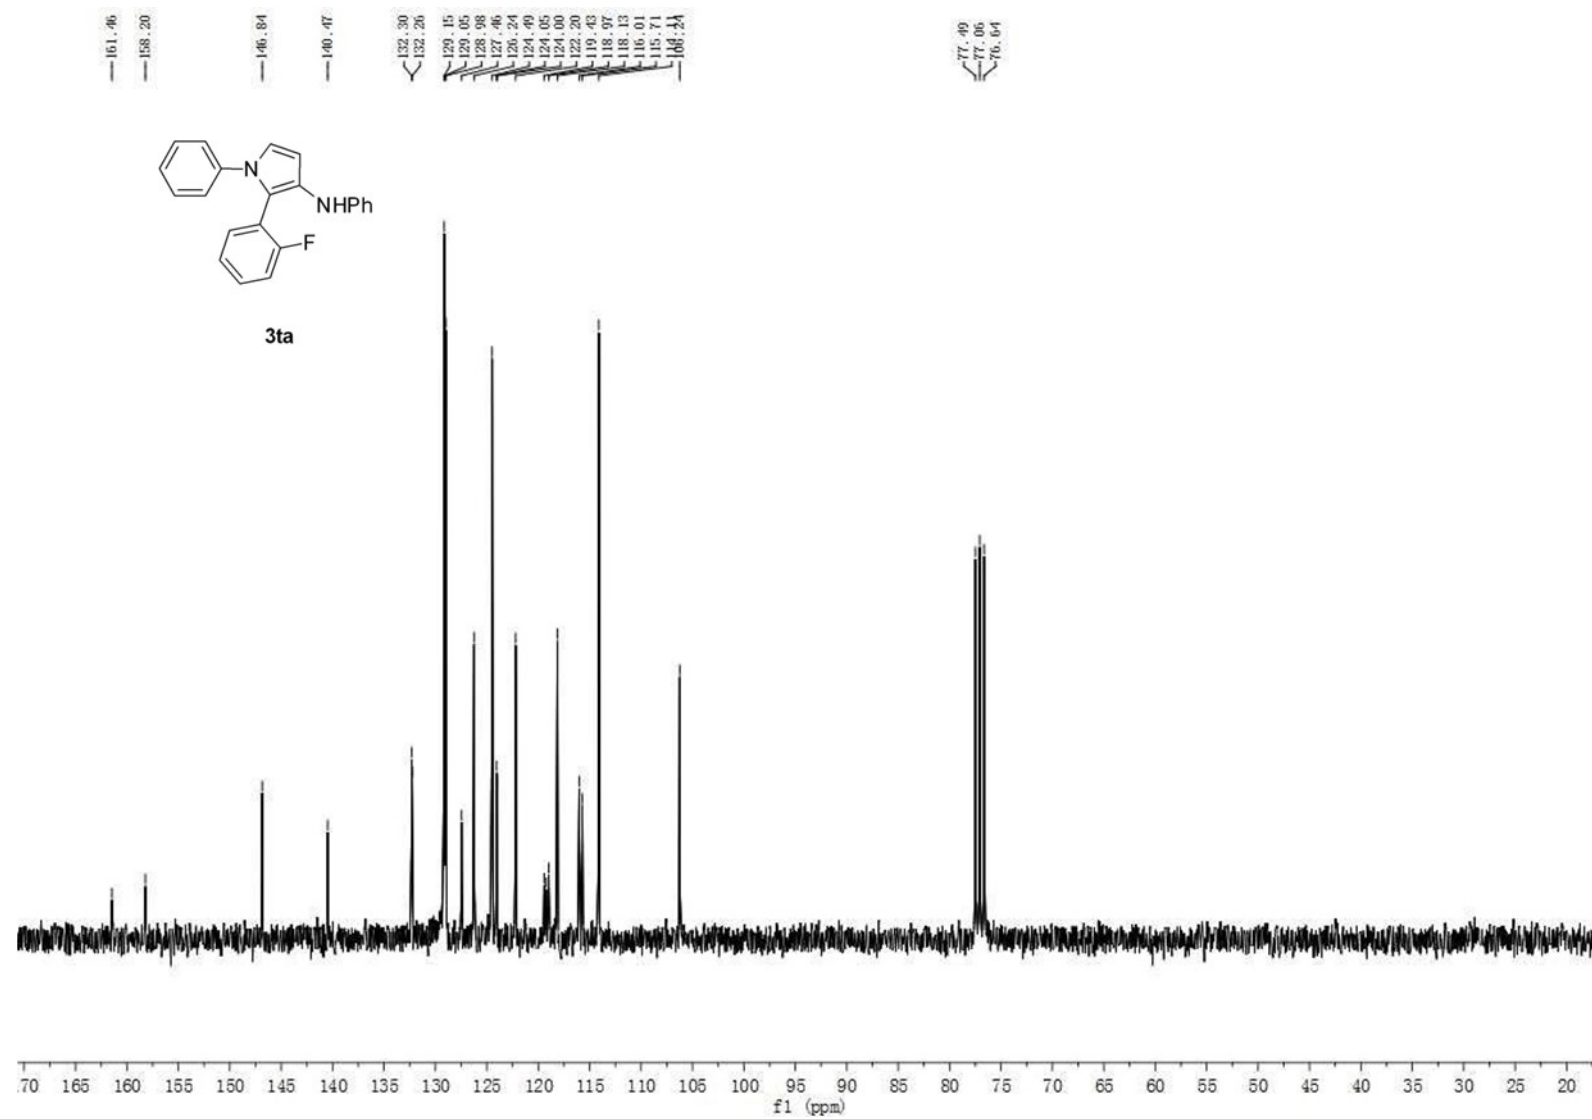



7.334  
7.310  
7.305  
7.291  
7.285  
7.263  
7.258  
7.242  
7.231  
7.207  
7.178  
7.157  
7.147  
7.139  
7.130  
7.120  
7.120  
7.113  
7.107  
7.104  
6.905  
6.894  
6.887  
6.883  
6.860  
6.858  
6.855  
6.812  
6.808  
6.804  
6.800  
6.779  
6.776  
6.766  
6.751  
6.704

5.219

0.075  
0.000

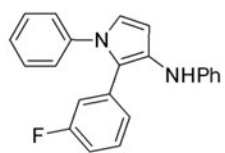

3ua

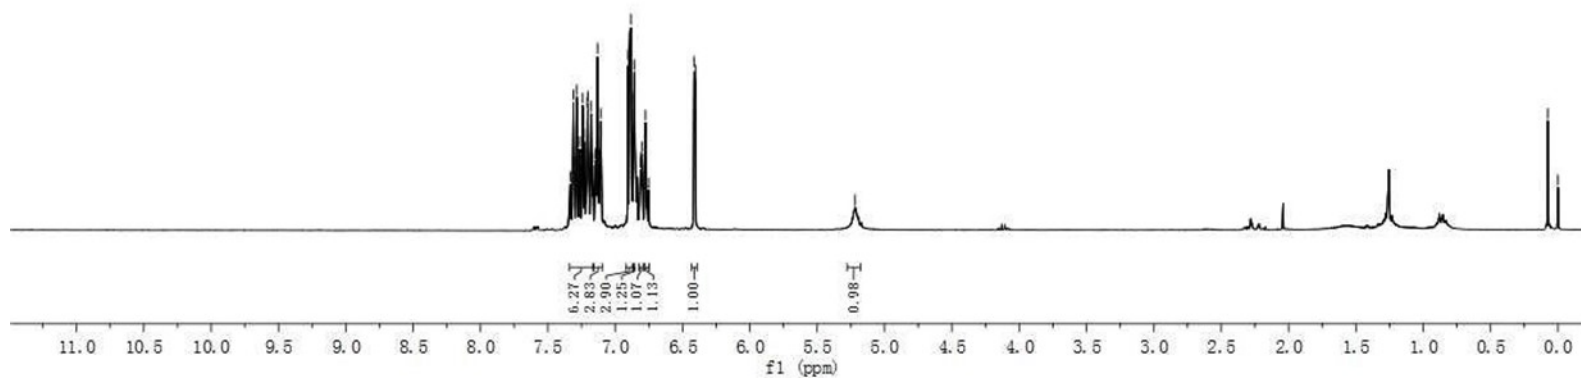

164.17  
160.92  
146.97  
140.13  
129.71  
129.60  
129.23  
129.08  
126.53  
126.43  
125.24  
125.16  
118.38  
116.33  
116.03  
114.12  
113.99  
113.21  
106.55  
77.42  
77.00  
76.58

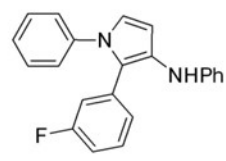

3ua

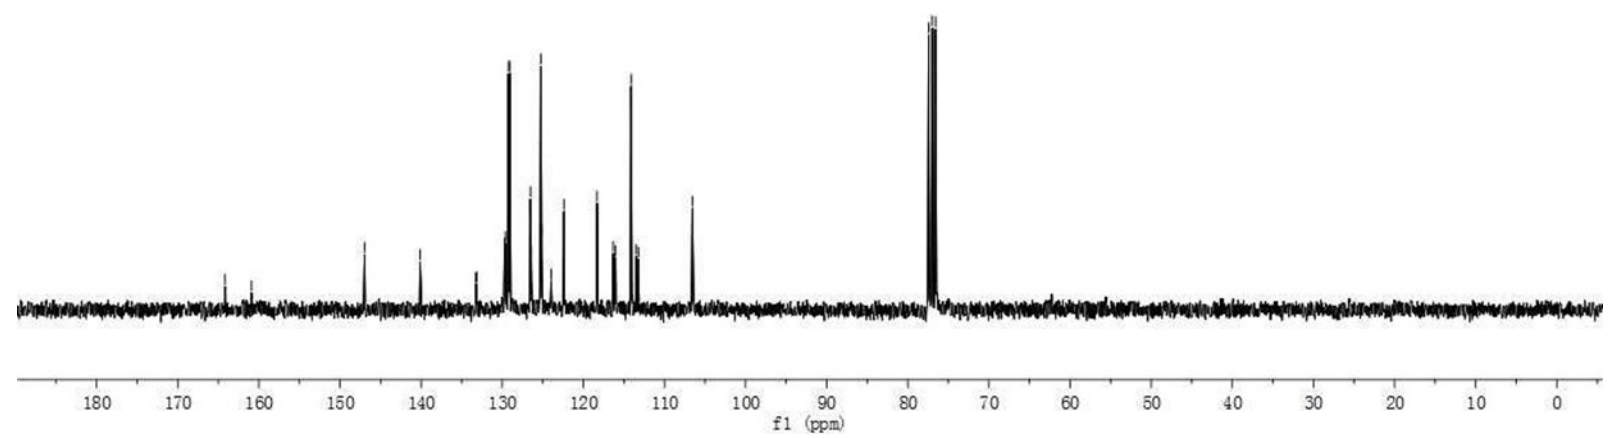

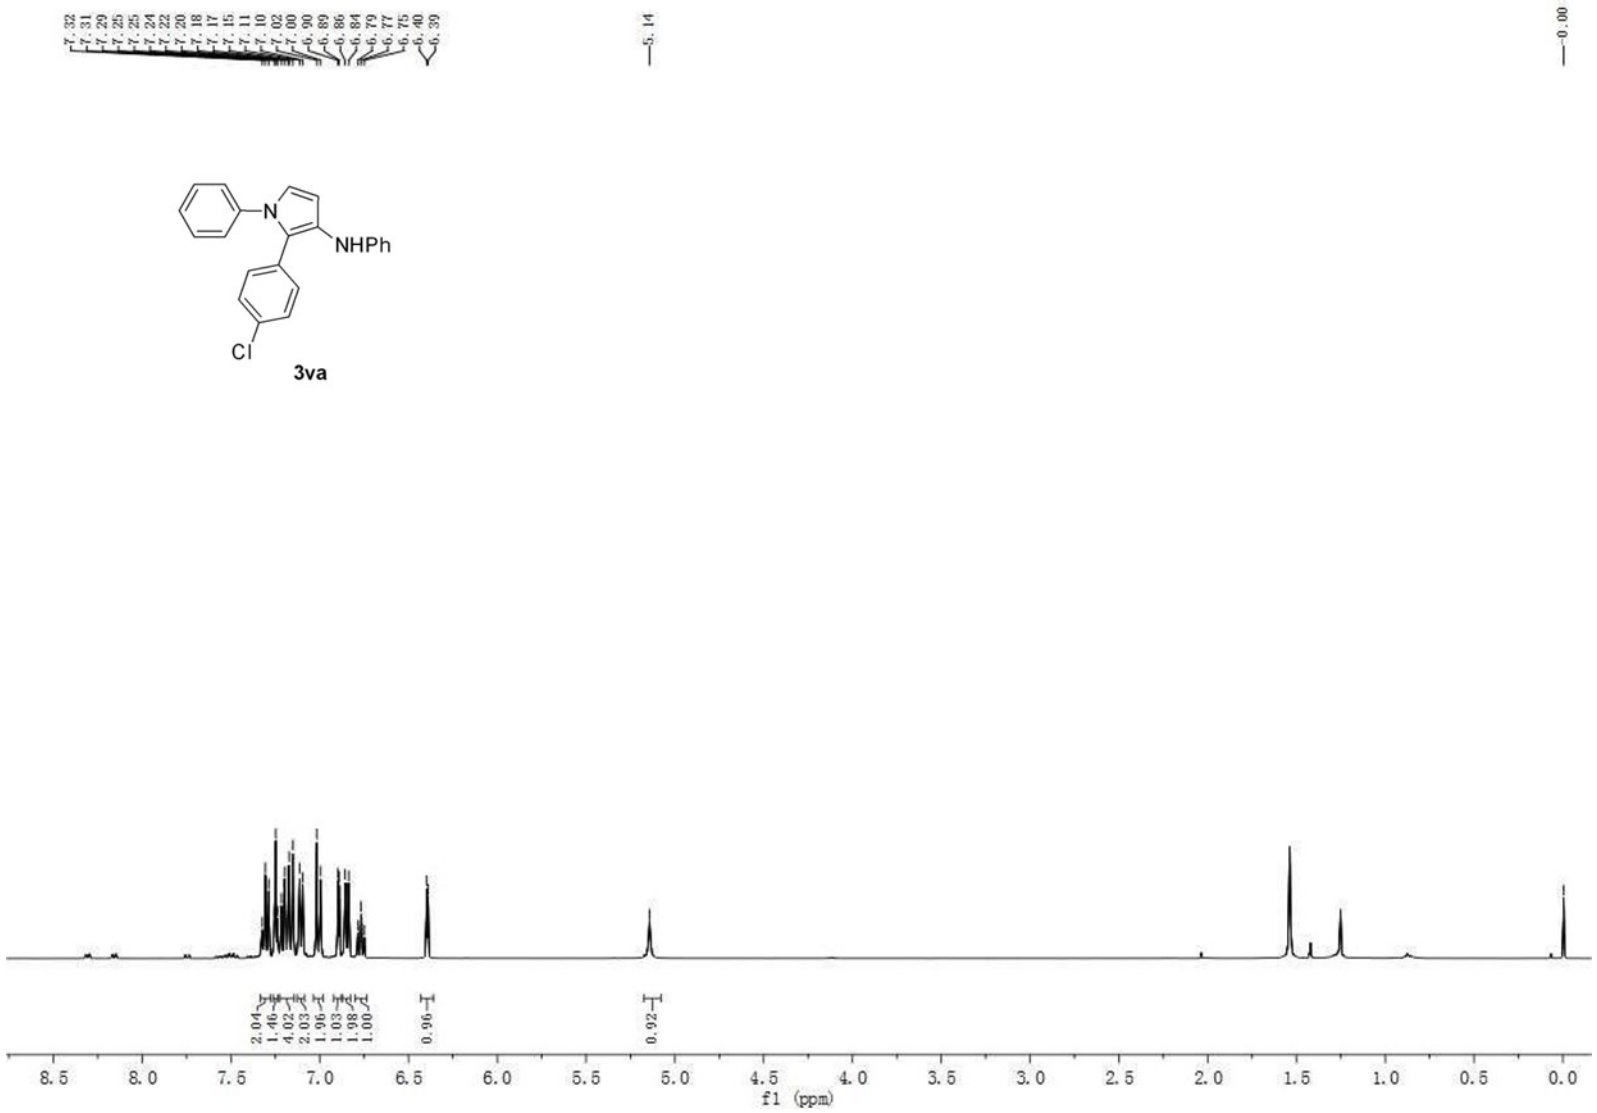

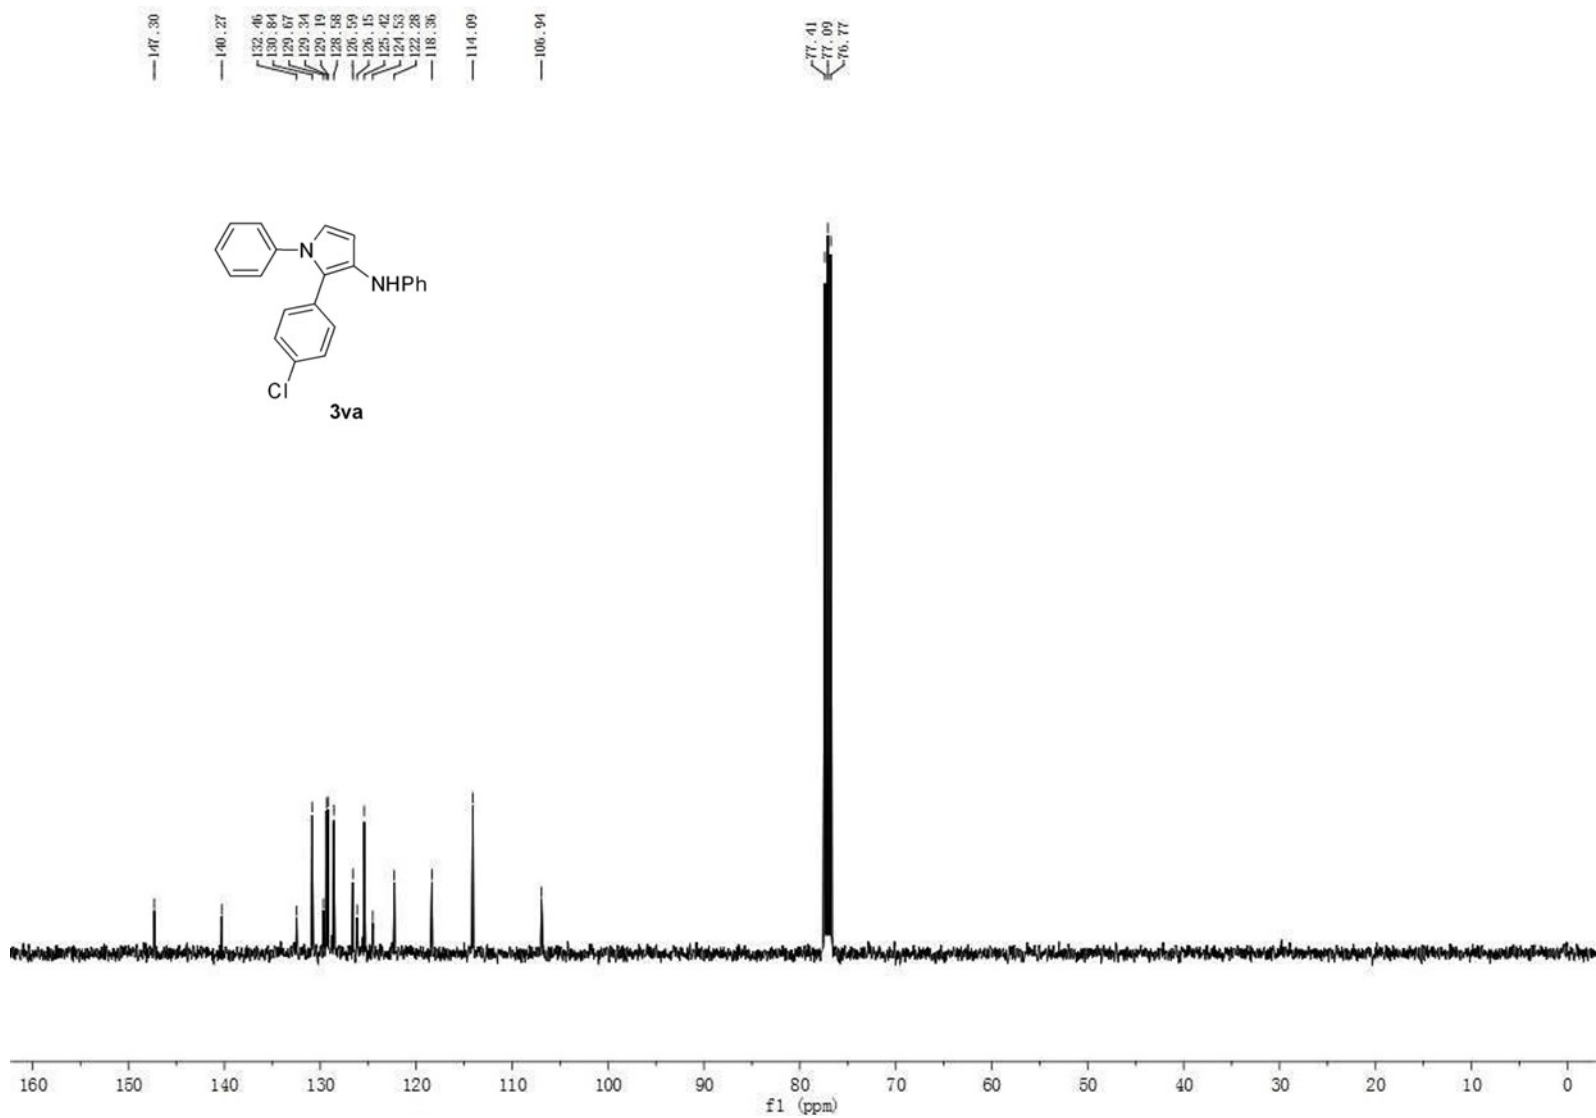

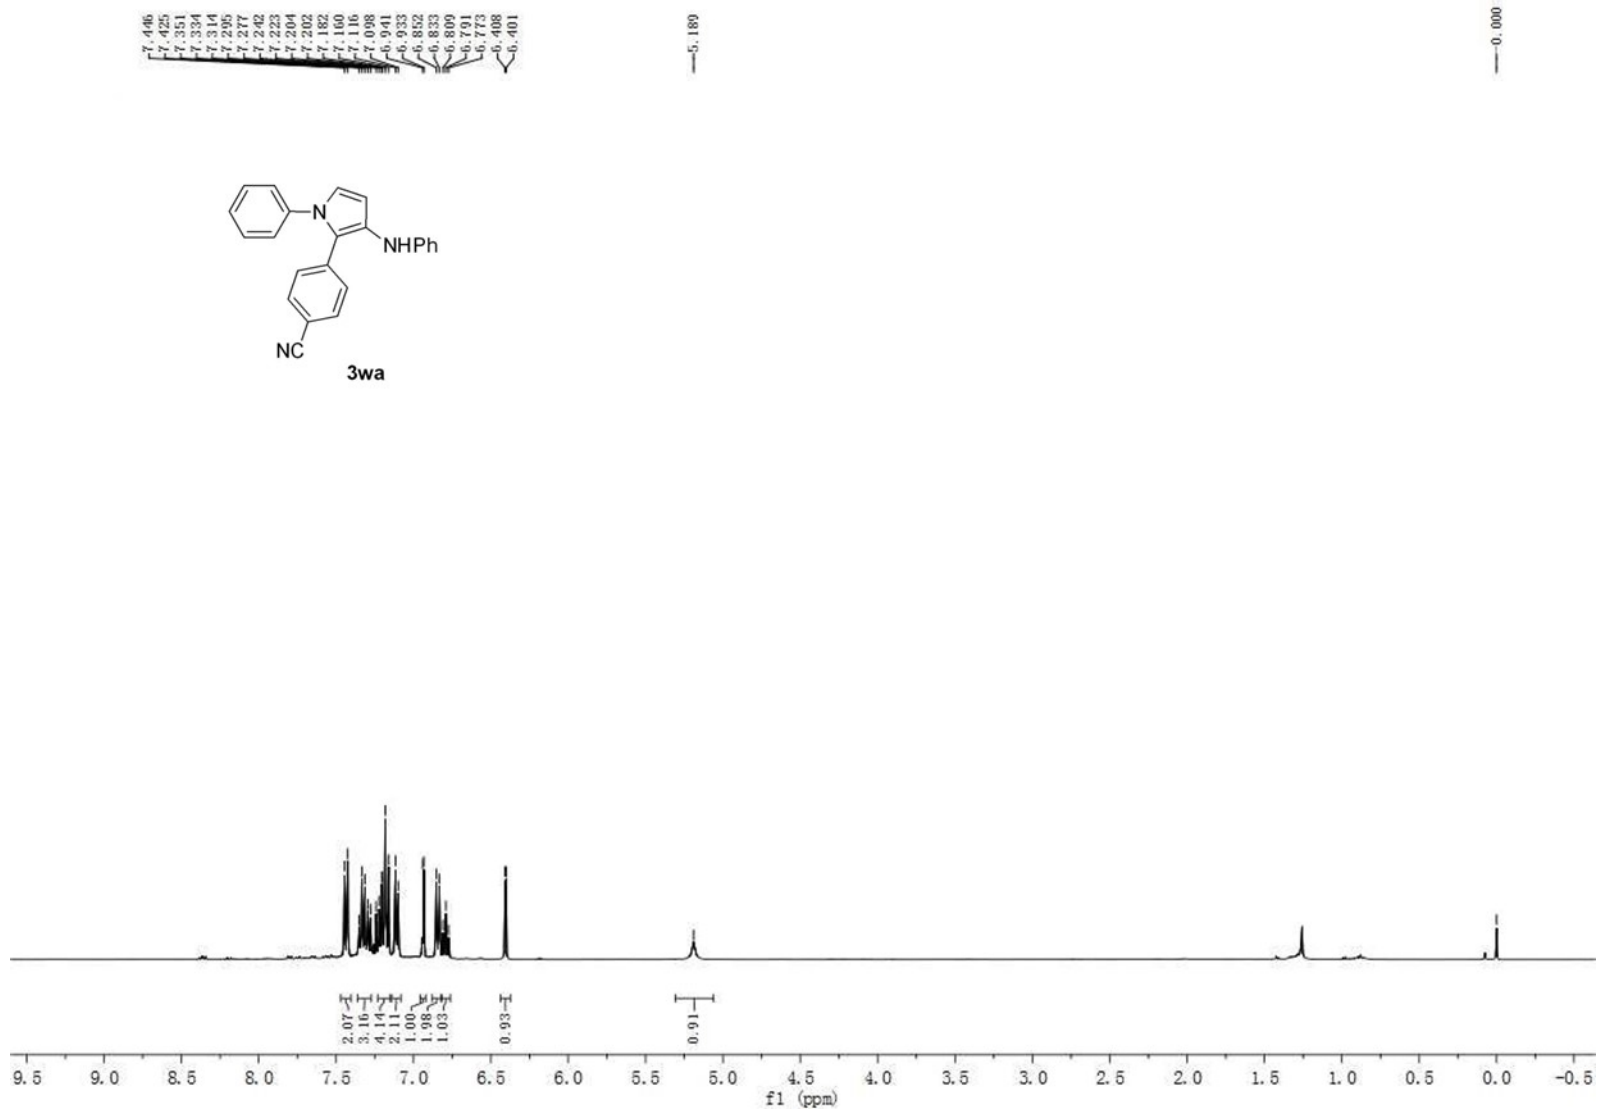

146.06  
139.94  
135.78  
131.91  
129.44  
129.30  
127.70  
126.92  
125.34  
123.92  
123.71  
118.94  
118.09  
114.24  
109.34  
107.08

77.32  
77.00  
76.08

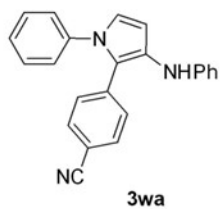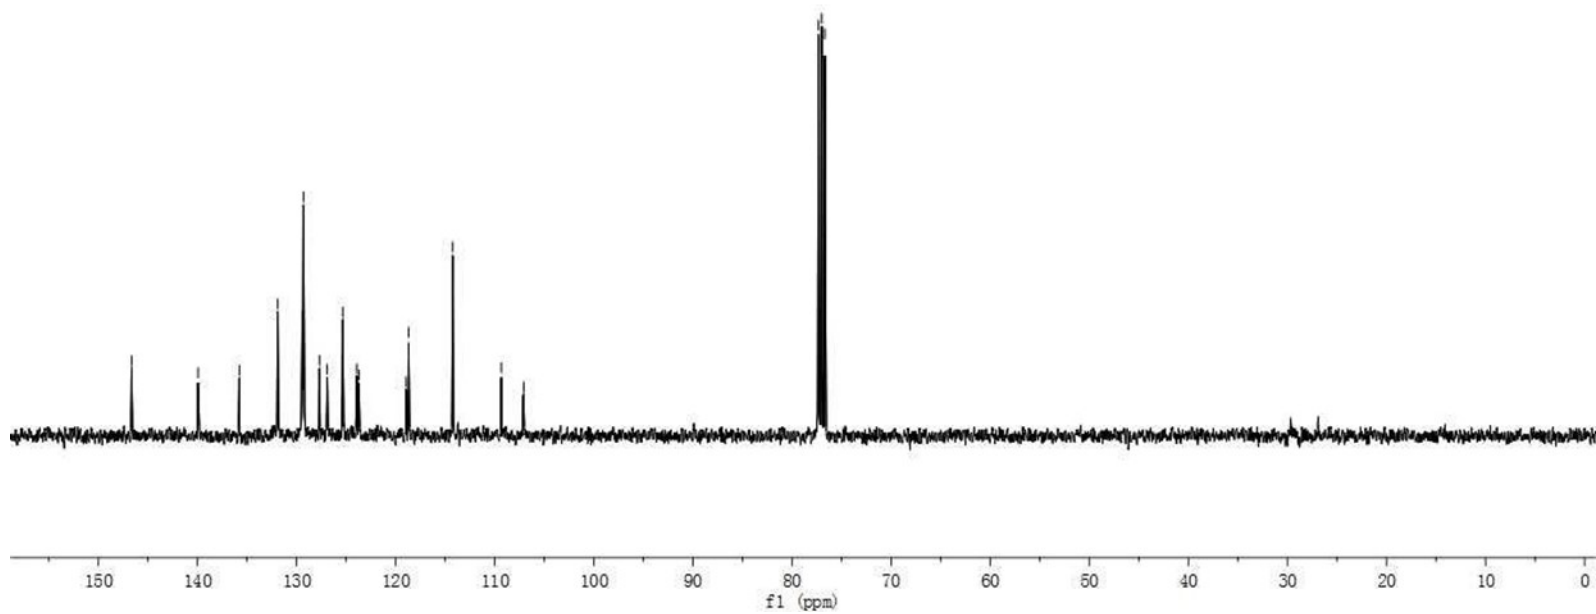

S114

7.820  
7.791  
7.764  
7.736  
7.405  
7.355  
7.329  
7.304  
7.227  
7.203  
7.153  
7.125  
7.100  
7.037  
7.009  
7.066  
7.049  
7.022  
7.038  
7.018  
6.993  
6.991  
6.845  
6.842  
6.830  
6.816  
6.813  
6.700  
6.566  
6.553  
6.568

0.002  
0.000

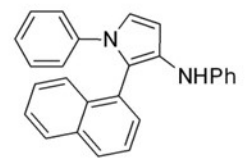

3xa

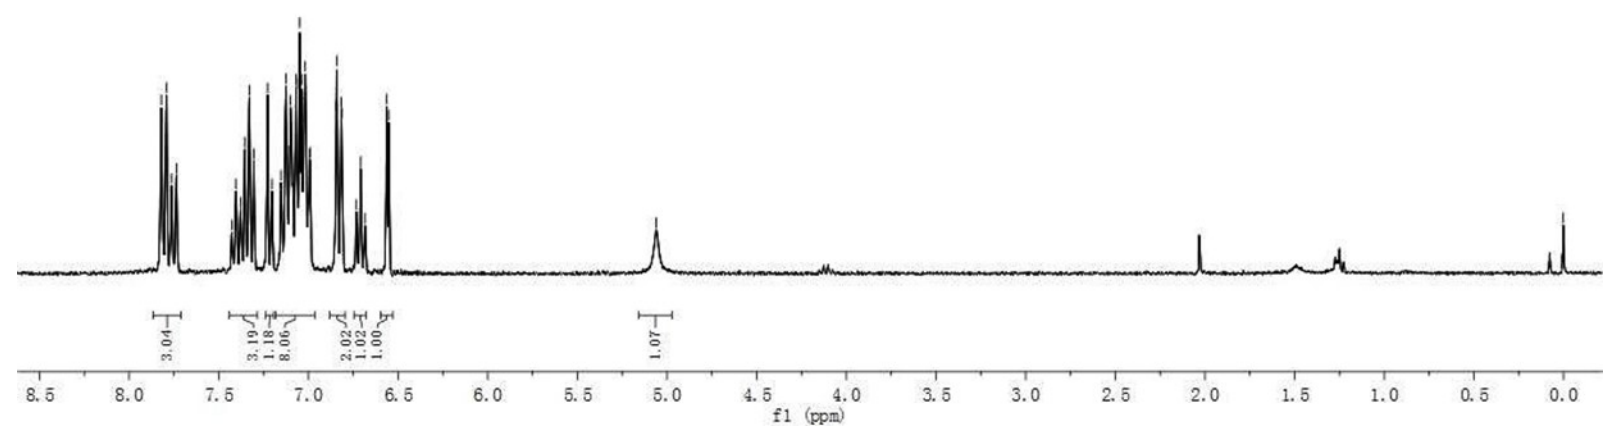

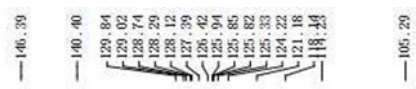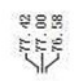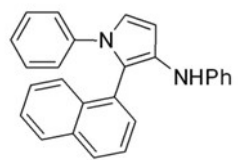

3a

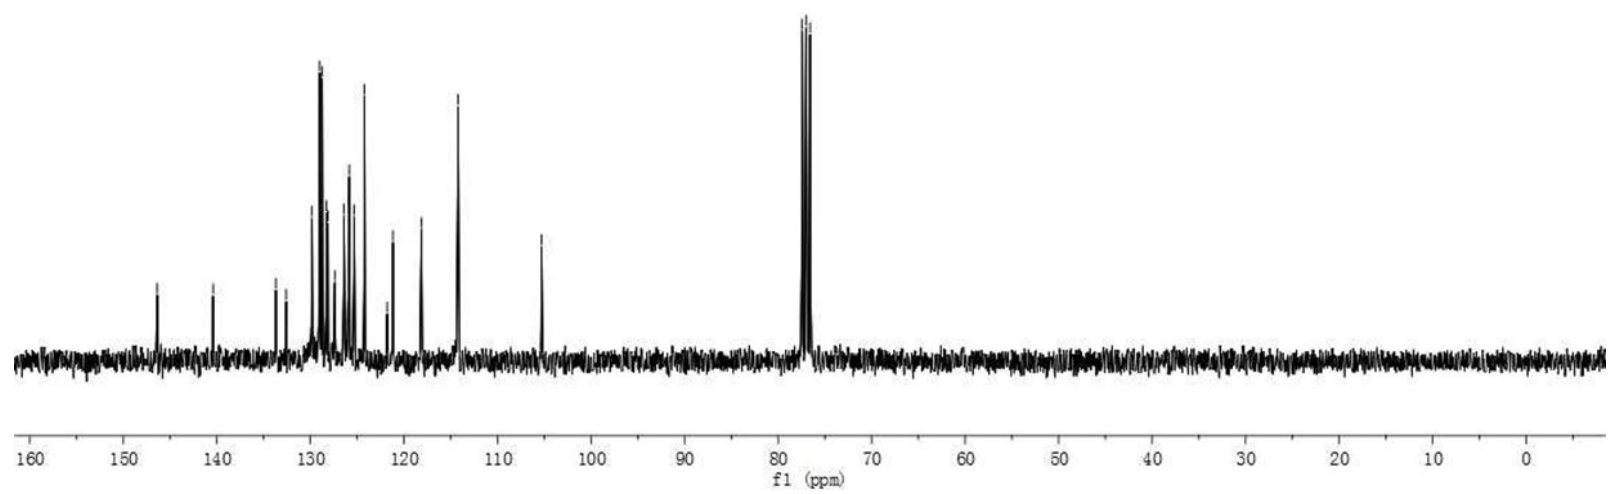



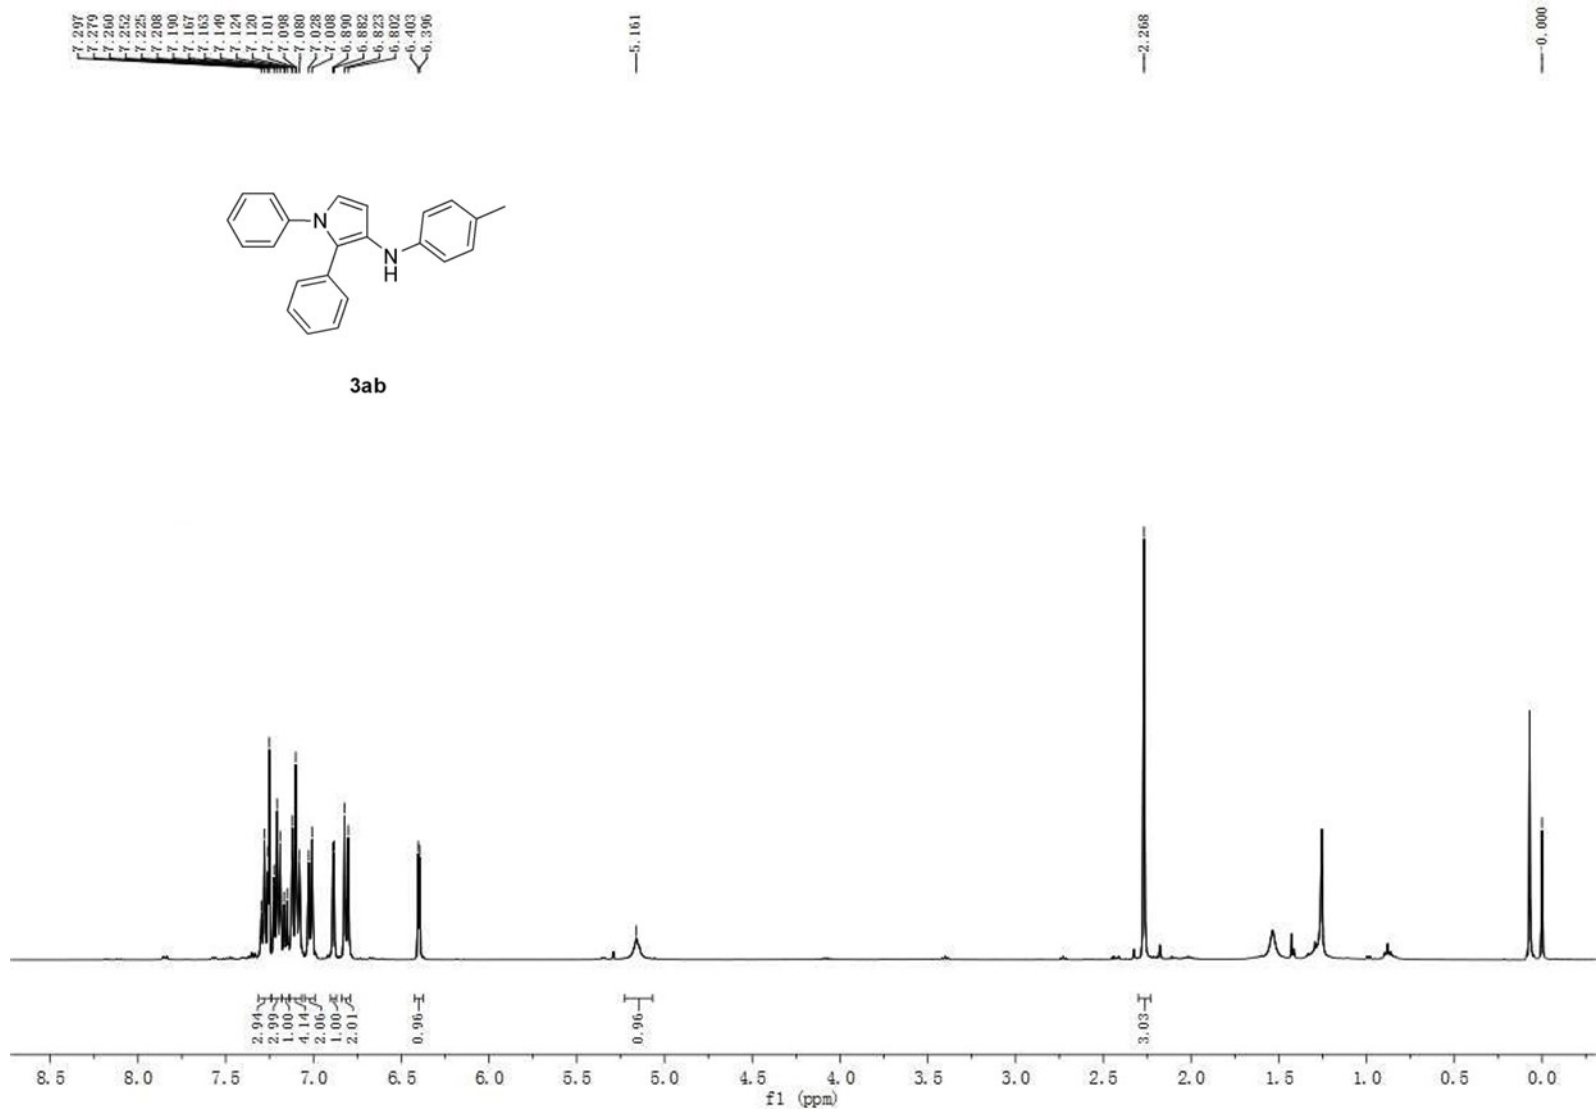

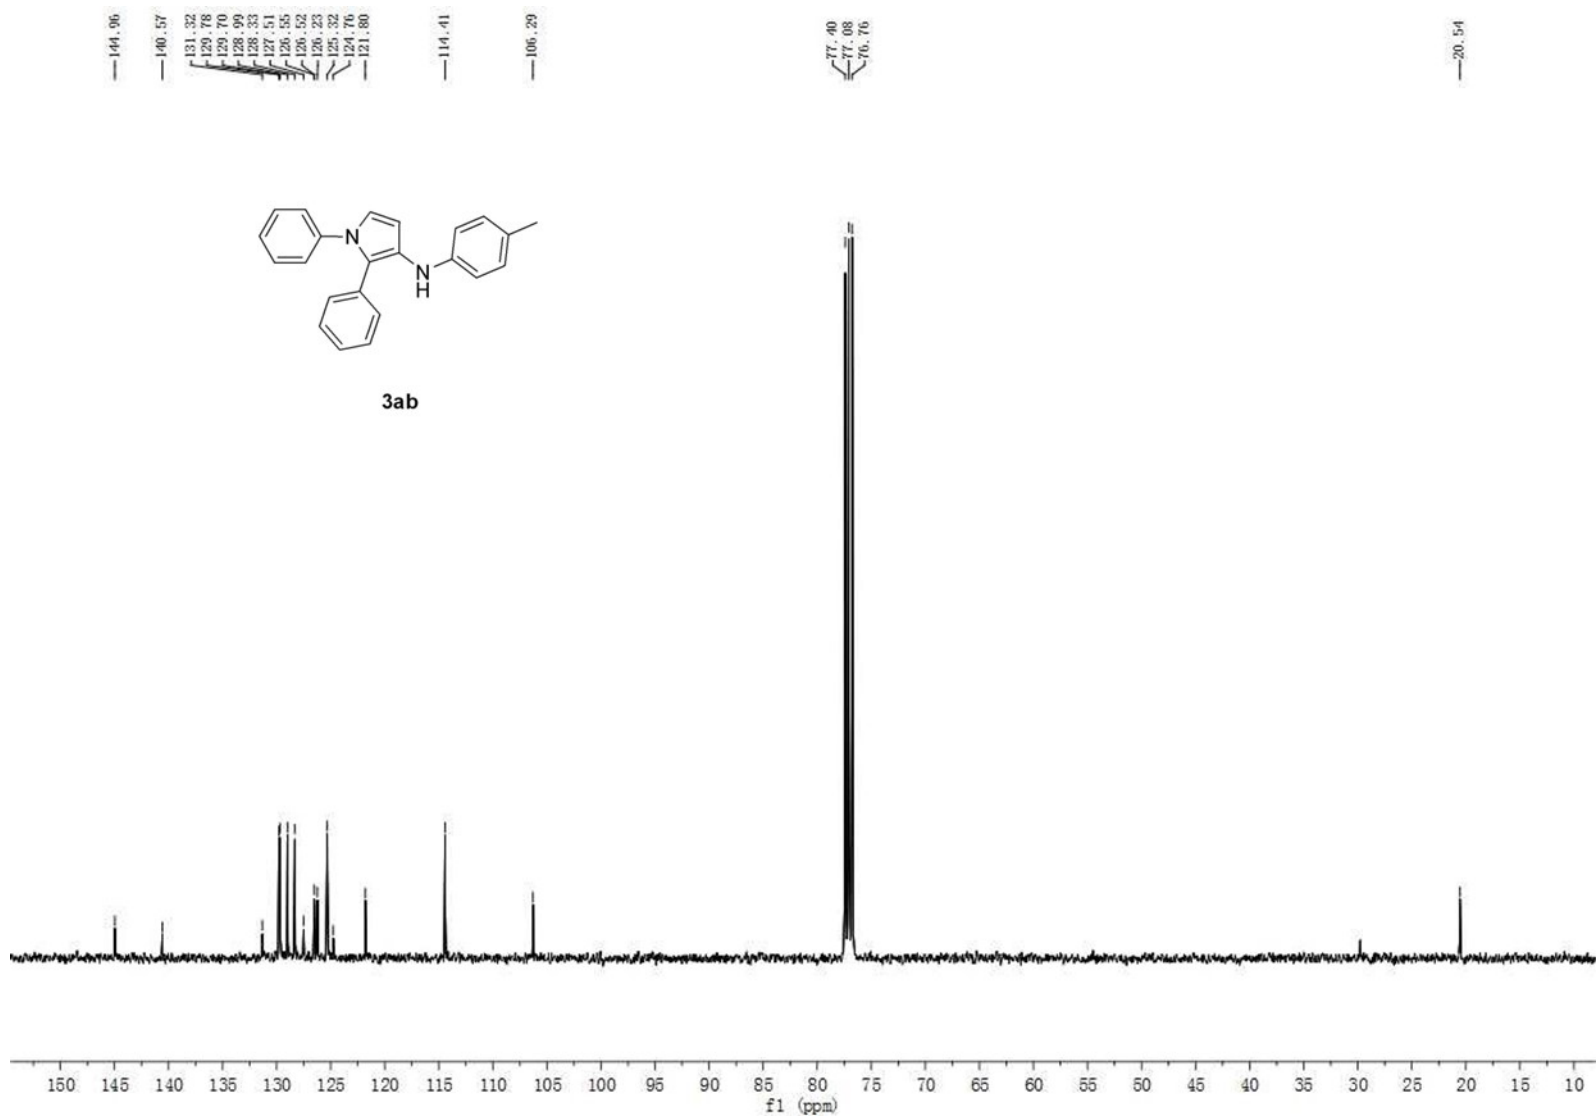

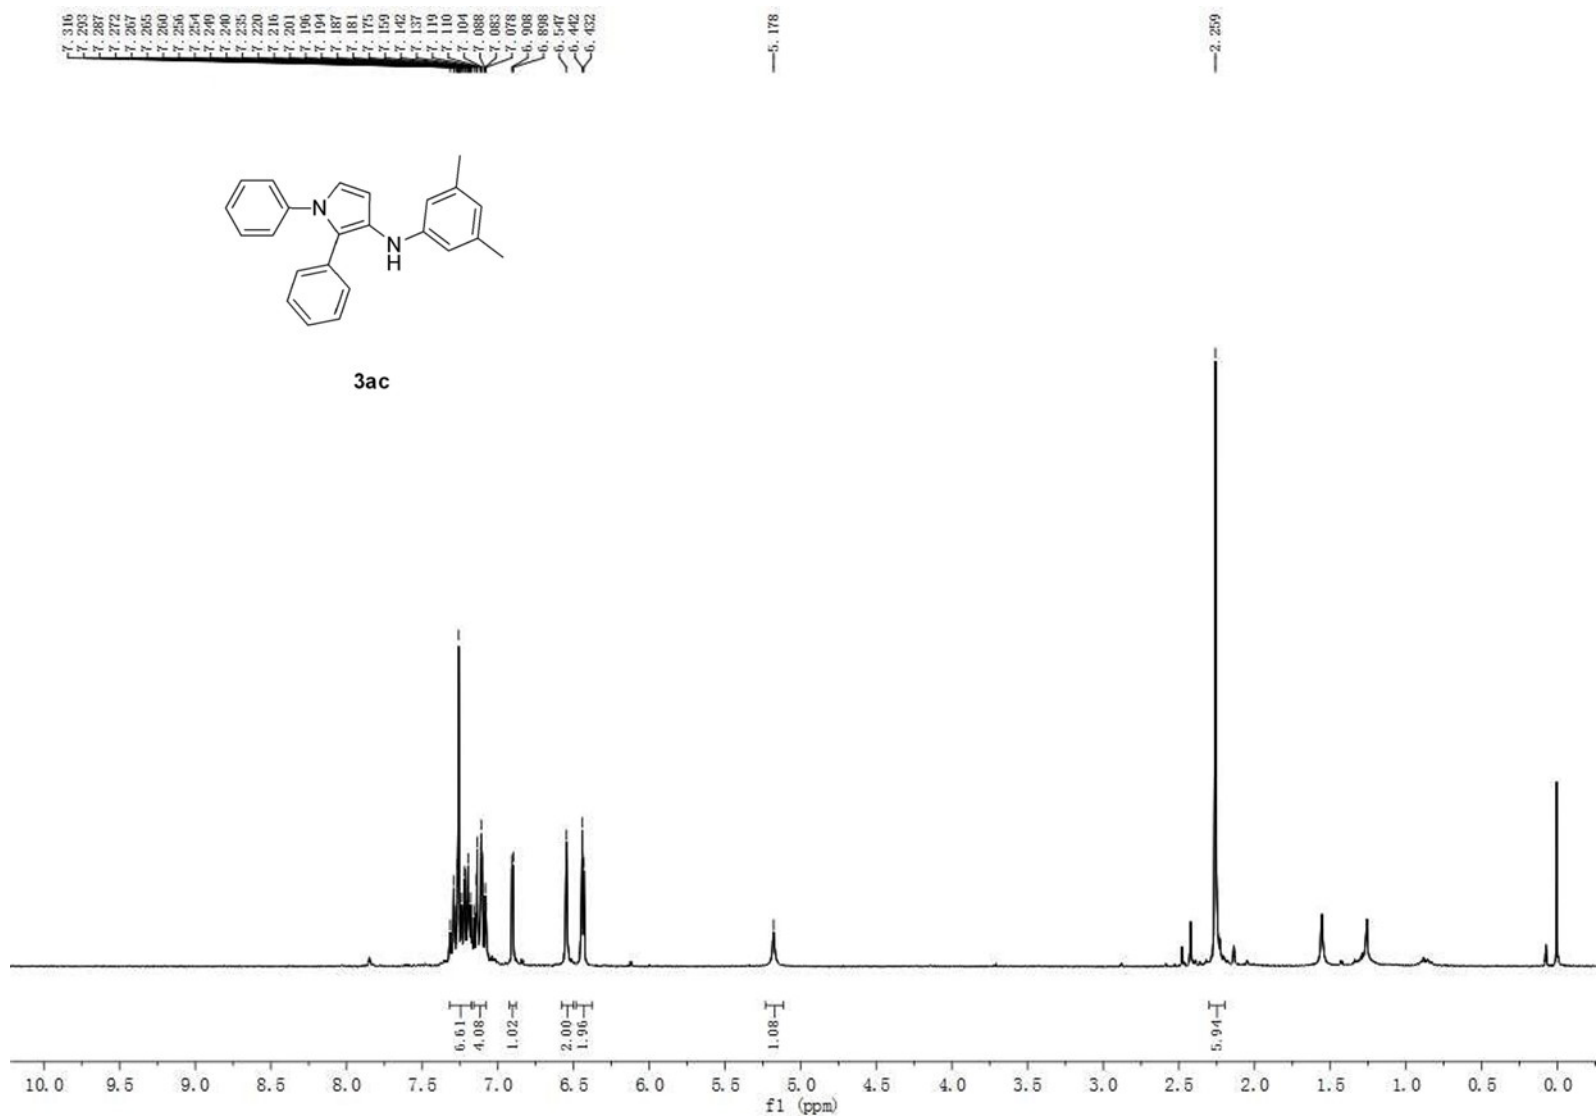

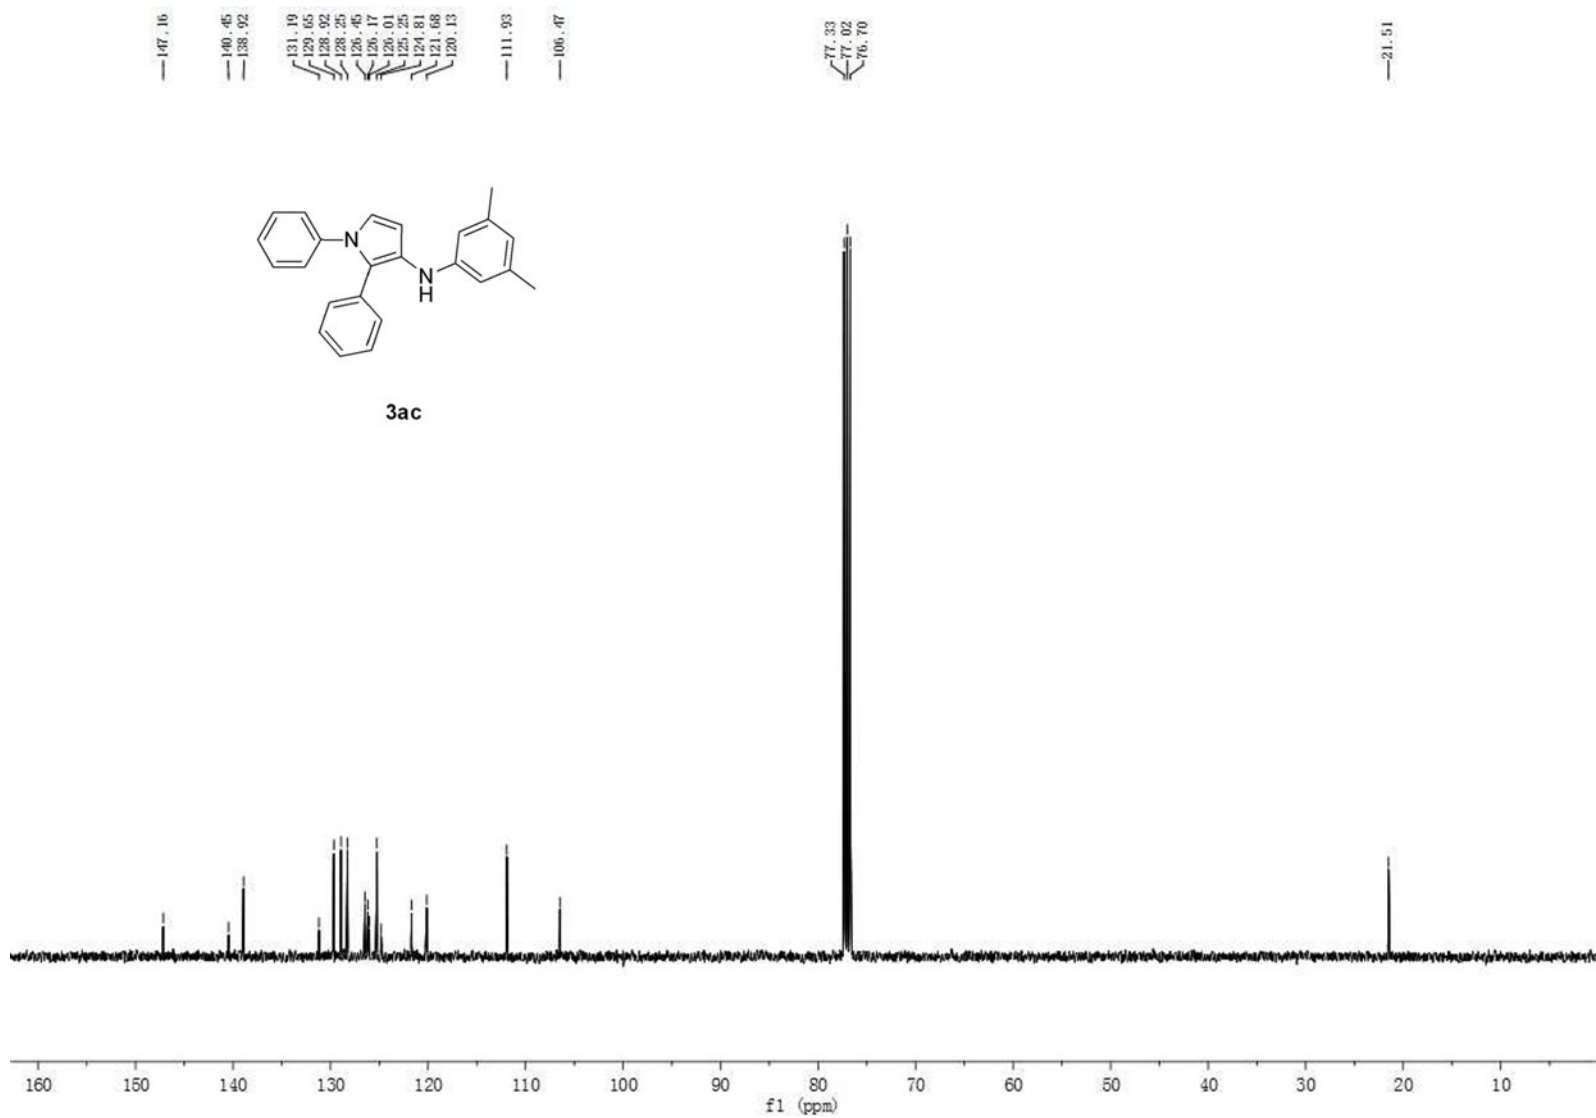

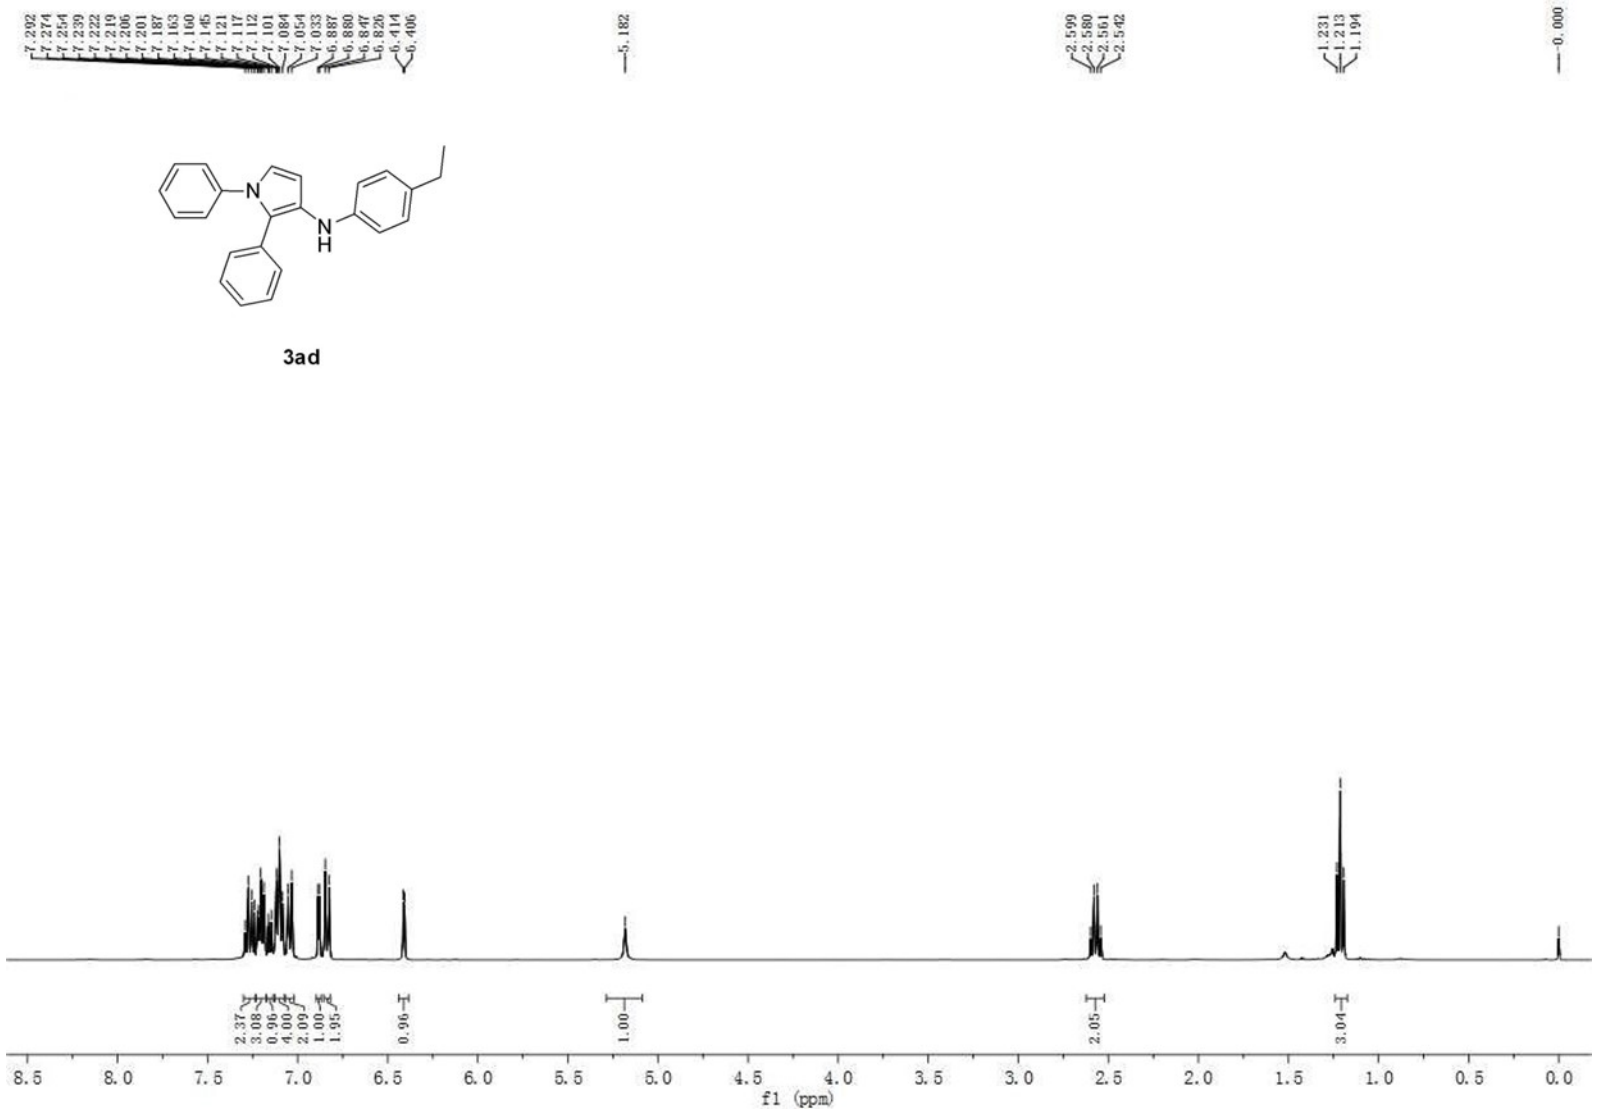

145.01  
140.48  
134.06  
131.25  
129.62  
128.90  
128.50  
128.24  
126.48  
126.42  
126.13  
125.22  
124.57  
121.70  
114.32  
106.15

77.32  
77.00  
76.08

27.99

15.89

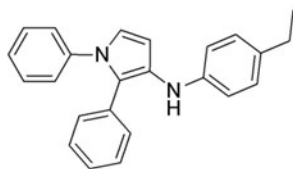

3ad

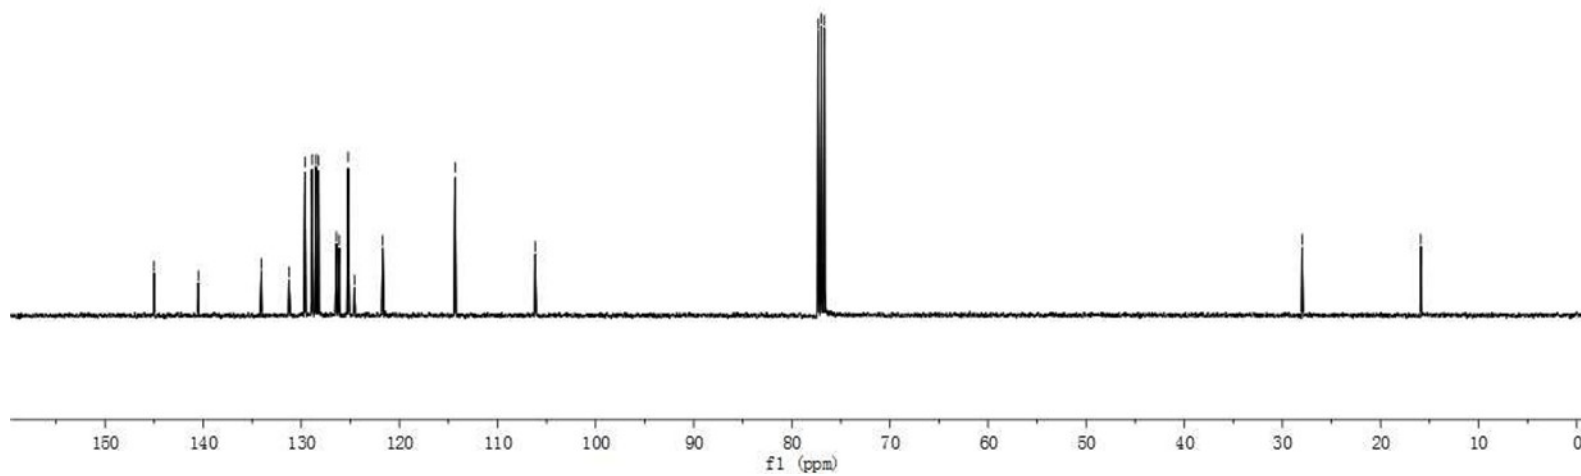

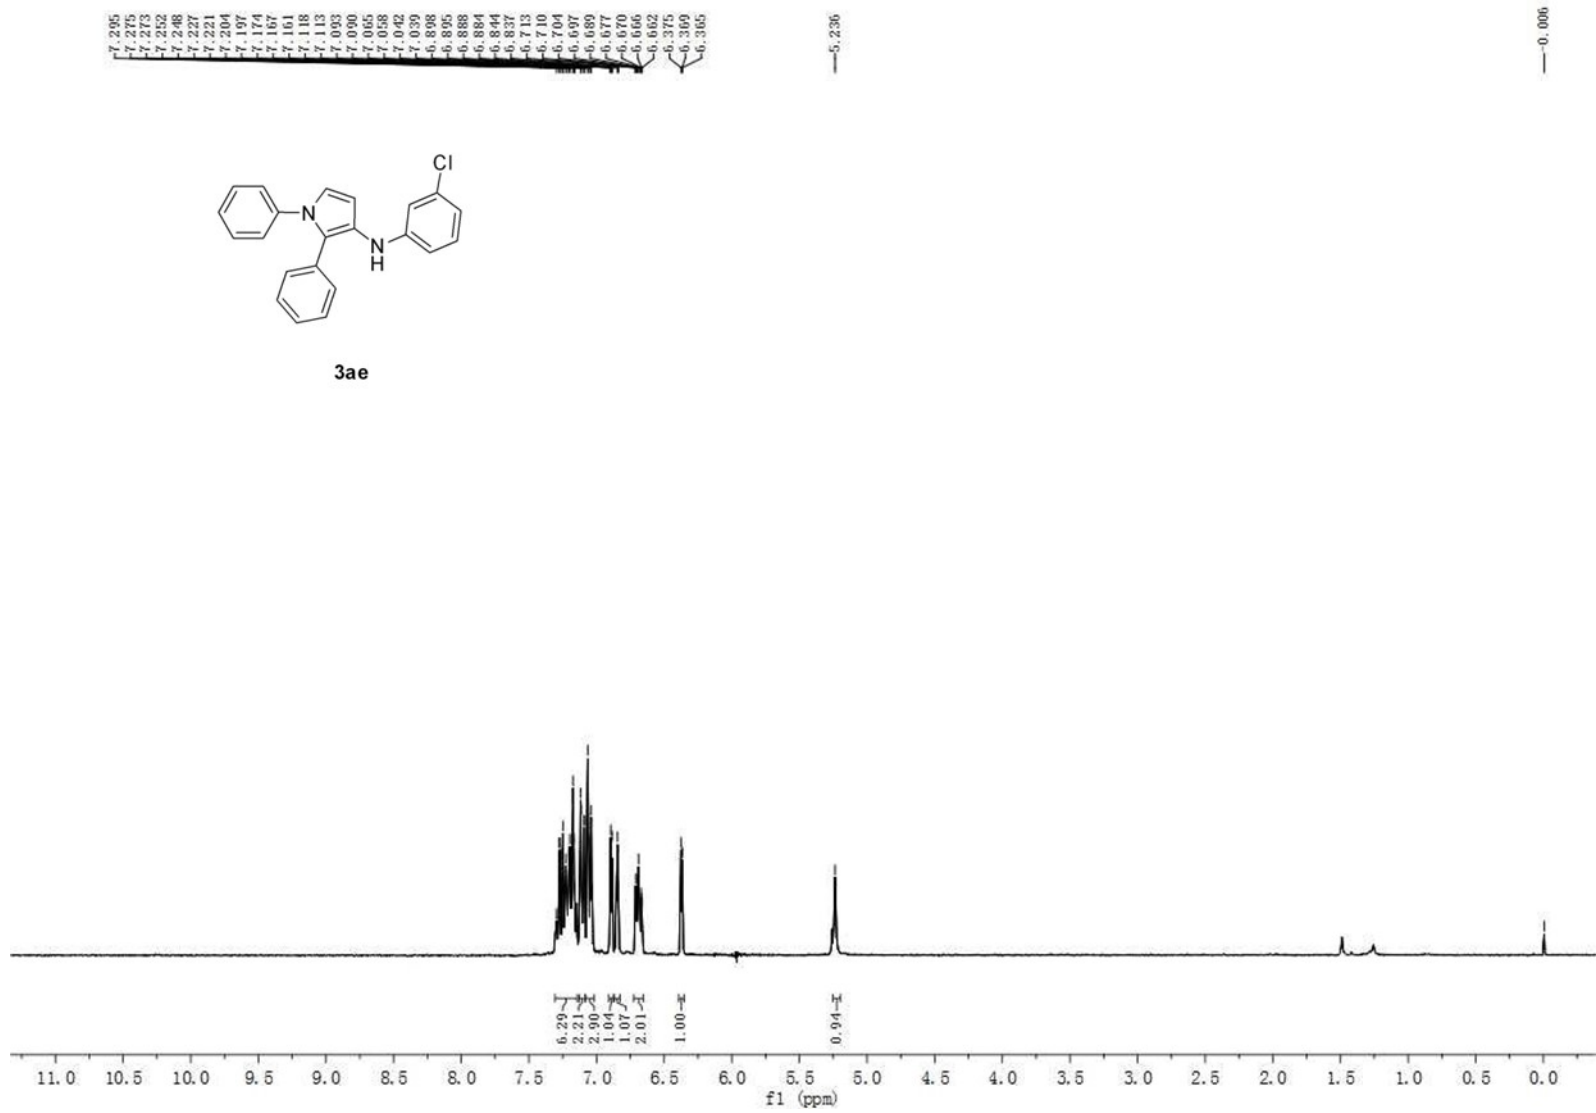

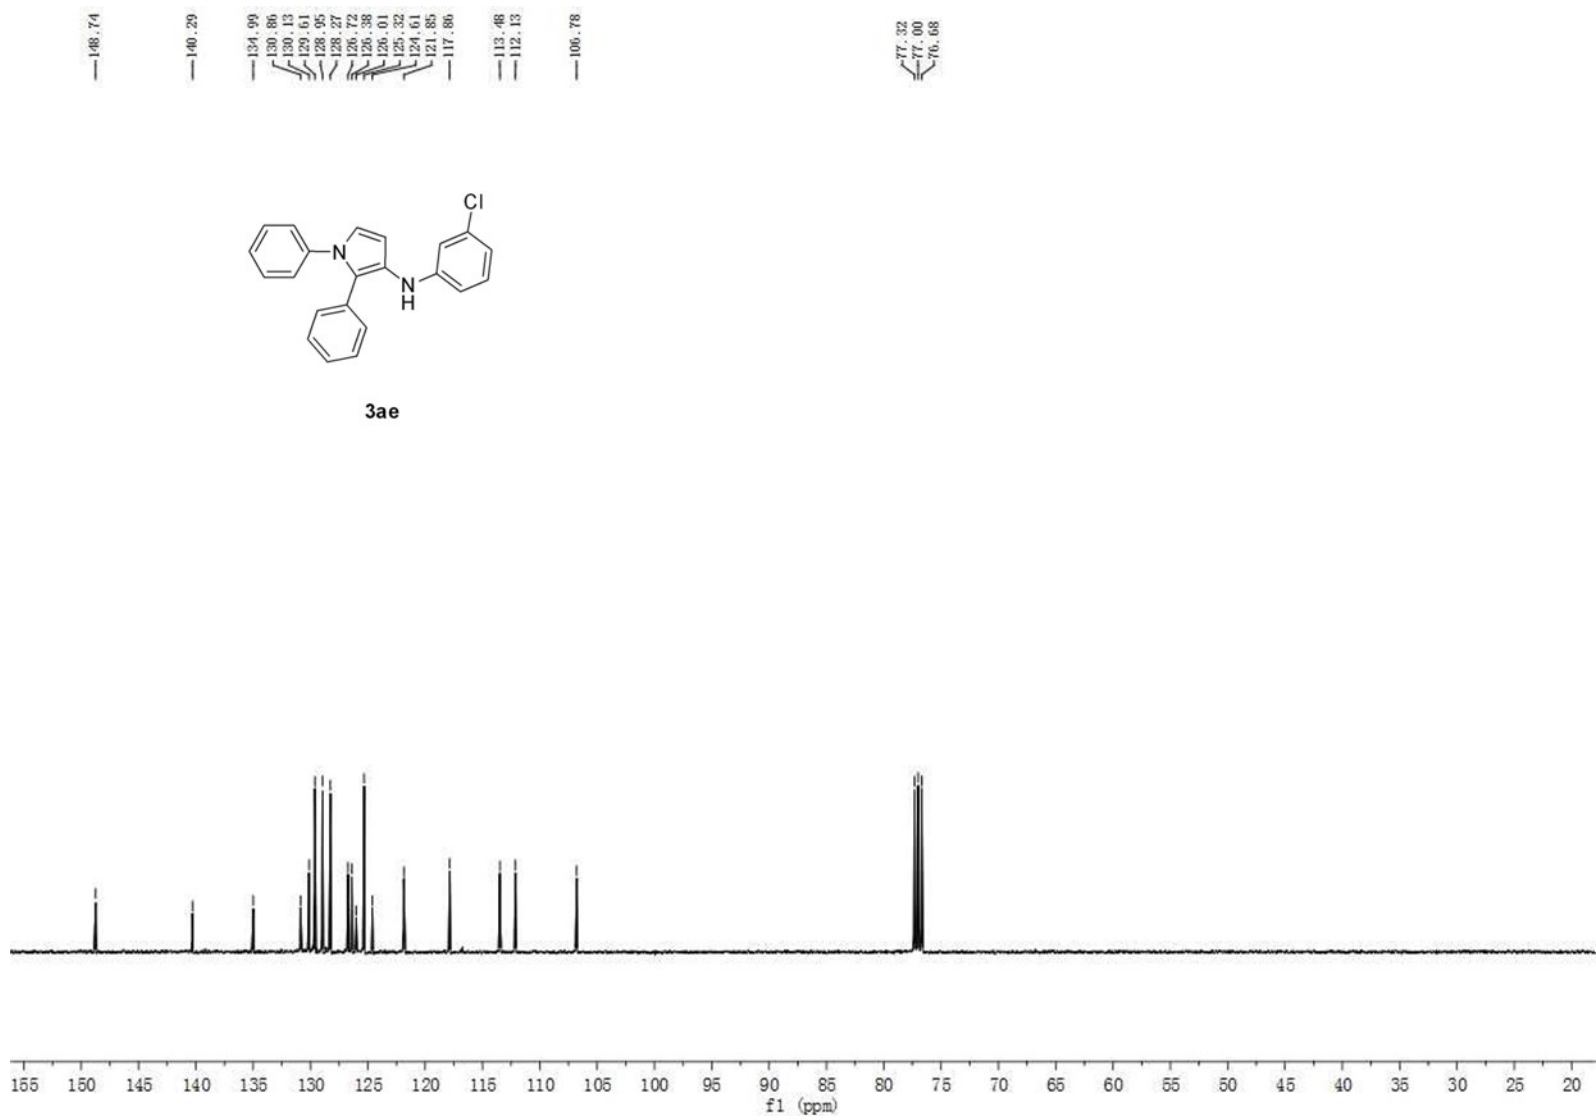



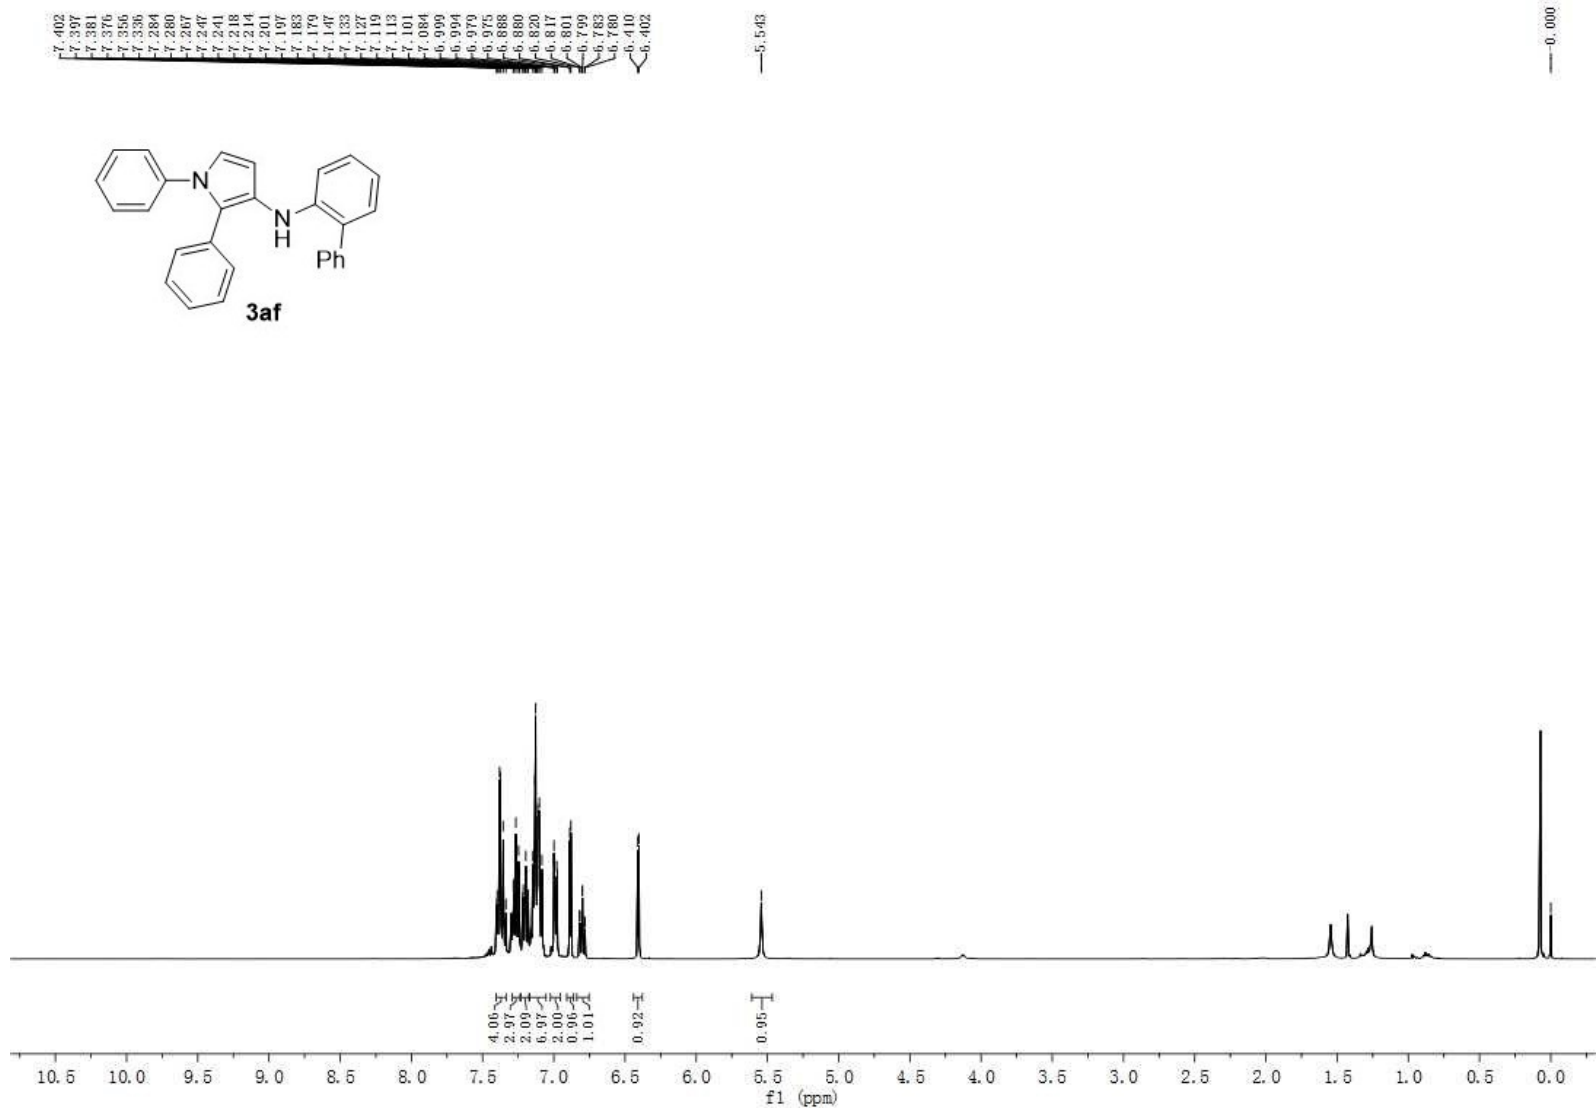

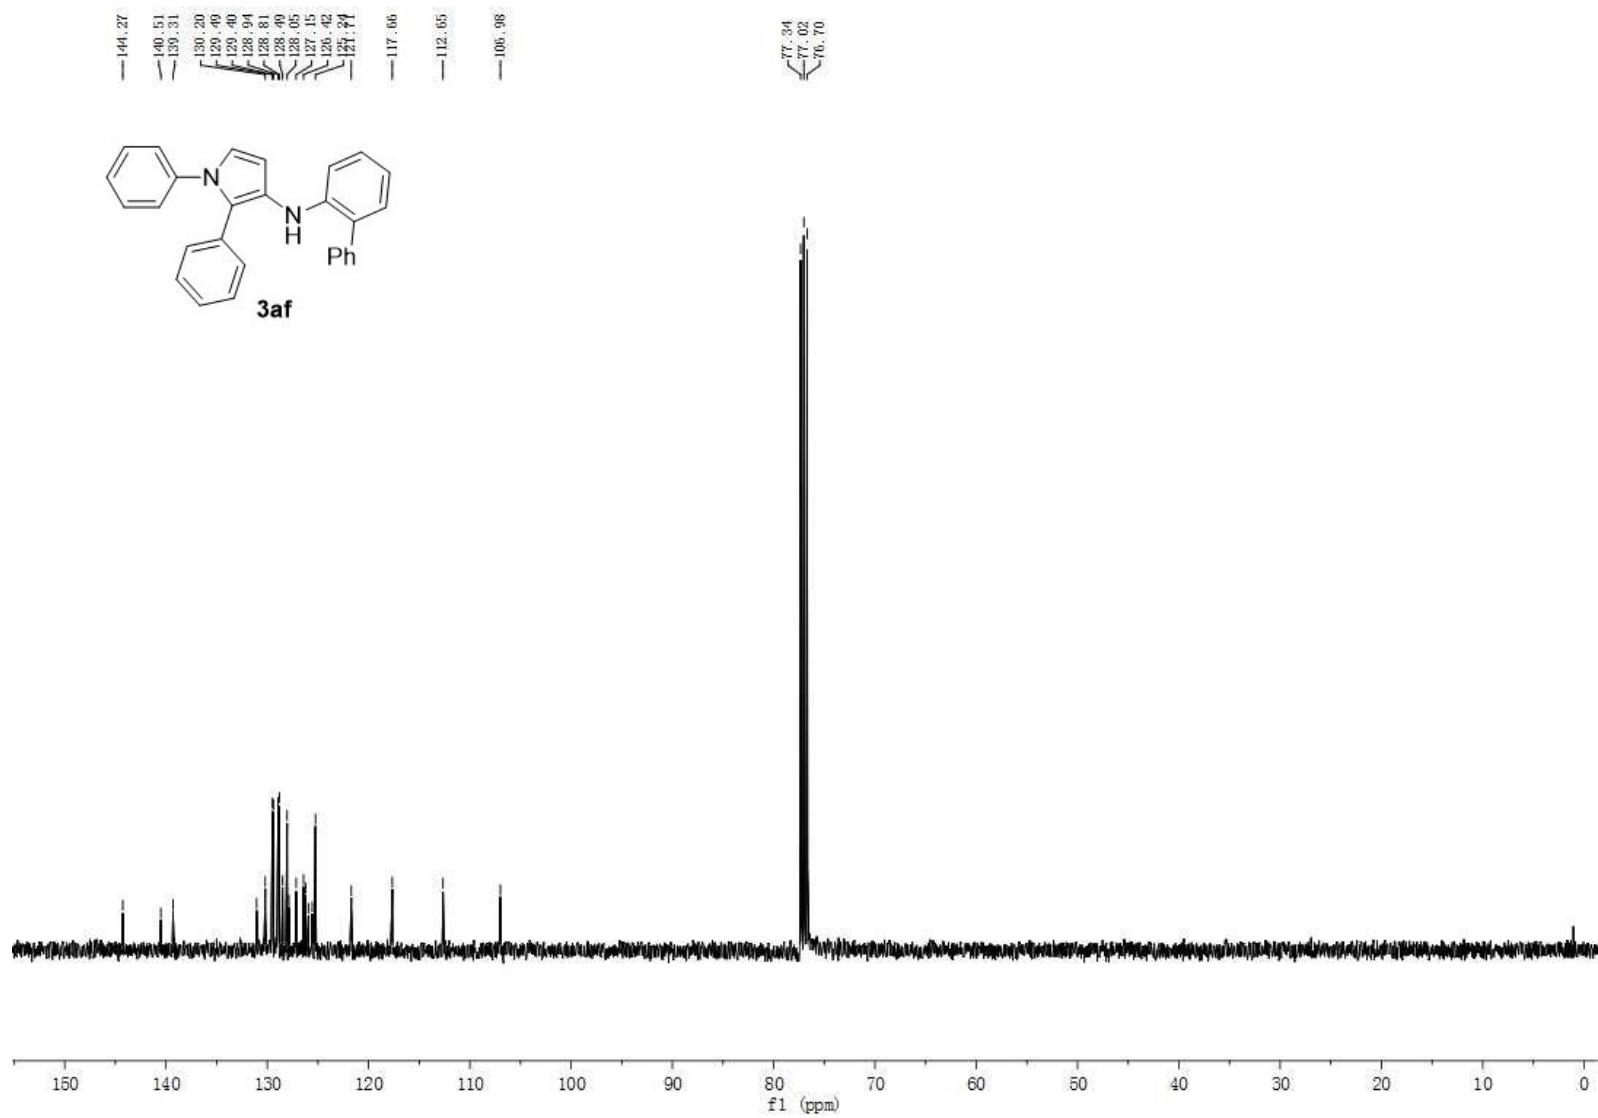

S126
